# Supplementary material
Source: PubMed Central journal article supplement (PMC5446075)
Supplement: NIHMS858081-supplement-Supplemental.pdf [file NIHMS858081-supplement-Supplemental.pdf]

# SUPPLEMENTARY FILE

## A RENEWED MODEL OF PANCREAS CANCER EVOLUTION BASED ON GENOMIC REARRANGEMENT PATTERNS

Faiyaz Notta<sup>1‡</sup>, Michelle Chan-Seng-Yue<sup>1\*</sup>, Mathieu Lemire<sup>1\*</sup>, Yilong Li<sup>2,\*</sup>, Gavin Wilson<sup>1,2</sup>, Ashton A Connor<sup>1</sup>, Rob E Denroche<sup>1</sup>, Sheng-Ben Liang<sup>3</sup>, Andrew MK Brown<sup>1</sup>, Jaeseung C Kim<sup>1,4</sup>, Tao Wang<sup>4,6</sup>, Jared T Simpson<sup>1,7</sup>, Timothy Beck<sup>1</sup>, Ayelet Borgida<sup>9</sup>, Nicholas Buchner<sup>1</sup>, Dianne Chadwick<sup>3</sup>, Sara Hafezi-Bakhtiari<sup>1,3</sup>, John E Dick<sup>1,5,8</sup>, Lawrence Heisler<sup>1</sup>, Michael A Hollingsworth<sup>9</sup>, Emin Ibrahimov<sup>1</sup>, Gun Ho Jang<sup>1</sup>, Jeremy Johns<sup>1</sup>, Lars GT Jorgensen<sup>1</sup>, Calvin Law<sup>10</sup>, Olga Ludkovski<sup>8</sup>, Ilinca Lungu<sup>1</sup>, Karen Ng<sup>1</sup>, Danielle Pasternack<sup>1</sup>, Gloria M Petersen<sup>11</sup>, Liran I Shlush<sup>8</sup>, Lee Timms<sup>1</sup>, Ming-Sound Tsao<sup>4,8</sup>, Julie M Wilson<sup>1</sup>, Christina K Yung<sup>1</sup>, George Zogopoulos<sup>12</sup>, John MS Bartlett<sup>1</sup>, Ludmil B Alexandrov<sup>13</sup>, Francisco X Real<sup>14</sup>, Sean P Cleary<sup>15,16</sup>, Michael H Roehrl<sup>3,8</sup>, John D McPherson<sup>1,4</sup>, Lincoln D Stein<sup>1,5</sup>, Thomas J Hudson<sup>1,5‡</sup>, Peter J Campbell<sup>2,17</sup>, Steven Gallinger<sup>1,15,16</sup>

<sup>1</sup>Ontario Institute for Cancer Research, Toronto, Ontario Canada,

<sup>2</sup>Cancer Genome Project, Wellcome Trust Sanger Institute, Hinxton, UK

<sup>3</sup>UHN Program in BioSpecimen Sciences, Department of Pathology, University Health Network, Toronto, ON, Canada

<sup>4</sup>Department of Medical Biophysics, <sup>5</sup>Molecular Genetics and <sup>6</sup>Laboratory Medicine and Pathobiology, University of Toronto, Toronto, ON, Canada

<sup>7</sup>Department of Computer Science, University of Toronto, Toronto, Ontario, Canada;

<sup>8</sup>Princess Margaret Cancer Centre, University Health Network (UHN), Toronto, ON, Canada

<sup>9</sup>Eppley Institute for Research in Cancer, Nebraska Medical Center, Omaha, NE, USA

<sup>10</sup>Division of Surgical Oncology, Sunnybrook Health Sciences Centre, Odette Cancer Centre, Toronto, ON, Canada

<sup>11</sup>Department of Health Sciences Research, Mayo Clinic, Rochester, MN, USA

<sup>12</sup>Research Institute of the McGill University Health Centre, Montreal, QC, Canada

<sup>13</sup>Theoretical Biology and Biophysics (T-6) and Center for Nonlinear Studies, Los Alamos National Laboratory, Los Alamos, New Mexico, USA

<sup>14</sup>Epithelial Carcinogenesis Group, Spanish National Cancer Research Centre (CNIO), Madrid, Spain; Department of Experimental and Health Sciences, Universitat Pompeu Fabra, Barcelona, Spain

<sup>15</sup>Lunenfeld-Tanenbaum Research Institute, Mount Sinai Hospital, Toronto, ON, Canada;

<sup>16</sup>Department of Surgery, University Health Network, Toronto, Ontario, Canada;

<sup>17</sup>Department of Hematology, University of Cambridge, Cambridge, UK.

\* These authors contributed equally to this work



## Table of contents

|                                                                                                                      |           |
|----------------------------------------------------------------------------------------------------------------------|-----------|
| <b>Supplementary Results</b> .....                                                                                   | <b>3</b>  |
| Tumour enrichment and overview of somatic alterations .....                                                          | 3         |
| Description of CN patterns in Diploids versus Polyploids using CELLULOID.....                                        | 4         |
| Timing of CN alterations and mutations in polyploids .....                                                           | 4         |
| Algorithm to detect chromothripsis - Chrom-AL.....                                                                   | 6         |
| Further details of chromothripsis in PC .....                                                                        | 6         |
| Description of Extended Data Fig. 5c .....                                                                           | 7         |
| Patterns of cataclysmic events in metastatic progression (related to Extended Data Fig. 6) .....                     | 7         |
| Reconstruction of rearrangement events in Pcsi_0171.....                                                             | 8         |
| Evidence for allelic losses preceding mutation in key preneoplastic driver genes, <i>TP53</i> and <i>SMAD4</i> ..... | 8         |
| <b>Methods</b> .....                                                                                                 | <b>10</b> |
| Ethics approval and sample acquisition.....                                                                          | 10        |
| Tumour cell enrichment.....                                                                                          | 10        |
| Library Construction and Whole Genome Sequencing .....                                                               | 11        |
| Immunohistochemistry and Fluorescence In-Situ Hybridization .....                                                    | 12        |
| Sequence alignment, variant calling and structural variants.....                                                     | 13        |
| Mutational Signatures .....                                                                                          | 14        |
| CELLULOID: Evaluation of tumour cellularity, tumour ploidy, and absolute copy number profiles .....                  | 14        |
| The interconnection between tumour ploidy and sample cellularity .....                                               | 17        |
| Chrom-AL: Algorithm to detect cataclysmic genetic events .....                                                       | 18        |
| Timing of copy number and mutations in polyploidy tumours .....                                                      | 22        |
| Statistical Analysis .....                                                                                           | 23        |
| Data Availability.....                                                                                               | 24        |
| <b>References:</b> .....                                                                                             | <b>25</b> |
| <b>Supplementary Figure and Table Legends</b> .....                                                                  | <b>27</b> |
| <b>Supplementary Figures and Tables</b> .....                                                                        | <b>31</b> |

## Supplementary Results

### Tumour enrichment and overview of somatic alterations

The extreme desmoplastic response in PC (herein referring to ductal adenocarcinoma only) is due to the accumulation of stromal cell types such as fibroblasts and lymphocytes. A cohort of 107 primary, stage I/II operable tumours were subjected two enrichment methodologies based on availability of viable fresh samples or frozen tissue. A complete list of clinical features of this cohort is provided in Supplementary Table 2. Fresh tumours were subjected to a multiparameter cell-sorting scheme where tumour epithelial cells were distinguished from fibroblasts and lymphocytes using cell surface antigens. Tumour cells were identified using epithelial cell adhesion molecule (EpCAM, CD326) (Extended Data Fig. 1a). Immunohistochemical (IHC) analyses of primary tumours using the same EpCAM antibody clone used for flow sorting confirmed the high specificity of this antigen to demarcate tumour epithelium (Extended Data Fig. 1b). Fibroblasts and lymphocytes were identified using a combination of markers associated with the mesenchymal (CD90, CD140b) or the blood cell lineage (CD45) (Supplementary Fig. 5a) and were not tumour derived (Supplementary Fig. 5b). From frozen tissue, tumour material was identified morphologically and enriched using laser capture microdissection (LCM) (Extended Data Fig. 1c). We performed whole genome sequencing (WGS) of tumour-enriched samples from 107 cases at an average depth of ~50X. Based on regions of loss of heterozygosity (LOH), we estimated that the median tumour cellularity of the sample cohort was 76% (flow-sorted: 95%, n=21; LCM: 72%, n=86; total) (Extended Data Fig. 1d). The application of these techniques enabled us to perform genome analysis on a large number of PC at a resolution that has previously not been reported.

Across our cohort (n=107), we identified a total of 942,773 somatic mutations (median: 5979, range: 3082 – 90290) and a mutation burden of 1.93 per Mb (range: 0.996 – 29.17 per Mb) (Extended Data Fig. 1e). At 50X WGS, we could easily detect the classical mutations in PC at high frequencies (*KRAS* – 93%; *TP53* – 74%; *SMAD4* – 30%; *CDKN2A* – 22%; Extended Data Fig. 1e). We replicated recent finding of the phenomenon of chromosome X hypermutation<sup>1</sup> (Extended Data Fig. 1f). We found a total of 11,293 somatic copy number changes (median: 85, range: 24 – 349) and 10,123 structural variants (4097 deletions, 2078 duplications, 2537 inversions, 1411 translocations) in our cohort (median: 74, range: 1 – 470).

## **Description of CN patterns in Diploids versus Polyploids using CELLULOID**

We used a new informatics tool, Celluloid, to analyze our tumour-enriched cohort and found a distinct pattern of copy number (CN)/SNP changes associated with diploid and polyploid tumours. Diploid tumours typically displayed three major CN/SNP clusters, with the largest cluster of heterozygous SNPs at CN 2 (Fig. 1a, top panel; Extended Data Fig. 2, Diploid). For example in Ashpc\_0008 (Fig. 1a, top panel), there are three distinct CN states (1 through 3), and there is a large cluster of germline heterozygous SNPs that align with a CN of 2. Regions of LOH (CN=1) and gain (CN=3) correspond to the loss or the addition of one parental allele. In a diploid tumour, regions unaffected by CN change (CN=2) would remain heterozygous (50% ratio) due to the retention of both parental alleles. Similarly, regions of LOH and gain would be expected to display SNP ratios that correspond to the loss or the addition of a parental allele (0 or 100%, 33 or 66%) (Supplementary Fig. 6a). Thus, the patterns of CN changes in Ashpc\_0008 are consistent with a diploid tumour. By contrast, polyploid tumours often exhibited four or more CN/SNP clusters, with a dominant cluster of heterozygous SNPs at CN 4 in tetraploids (Fig. 1a, bottom panel; Extended Data Fig. 2, polyploid). In Ashpc\_0005, there are 5 major CN states, and the largest cluster of heterozygous SNPs (50%) resides at a CN of 4 (Fig. 1a, bottom panel). The rest of the CN states (5, 3, 2, 1) correspond to SNP ratios that denote the absolute number of parental alleles present at that state. In a tetraploid tumour, regions unaffected by CN change would have two copies of each parental allele (CN=4) and thus would retain heterozygosity (Supplementary Fig. 6bi). However, CN losses and gains that occurred before or after genome duplication would display a variegated pattern of SNP ratios (Supplementary Fig. 6b, bottom). These patterns of CN/SNP changes are consistent with a polyploid tumour. We validated several tumours for CN changes from ploidy call from Celluloid (Extended Data Fig. 2). By relating tumour cellularity to ploidy, we also verified that the frequency of polyploidization was not being under or overestimated ( $p=0.46$ , Kruskal-Wallis test; Extended Data Fig. 3a).

### **Timing of CN alterations and mutations in polyploids**

We used the following approach to determine the mutational timing in polyploids. To develop the reasoning behind the approach, consider the illustrative scenario in which a single copy of DNA was lost in a tetraploid tumour prior to genome duplication (i.e. from 2 to 1); after doubling, the CN of this alteration would return to 2 but would appear to be loss of heterozygosity (LOH) because only one allele could be duplicated (Supplementary Fig. 6b-ii).

Thus, in tetraploids, we can estimate that segments at 2 copies at LOH represent losses before genome duplication, although we cannot exclude the possibility that both alleles from one parent were lost after genome duplication. On the other hand, CN losses following genome duplication would generally appear as single step changes (e.g. 4 to 3; Supplementary Fig. 6b-iii,iv). A similar set of logical deductions can also be applied to other CN changes (Methods). We also inferred the timing of mutations in polyploids. According to the principle of parsimony, mutations acquired before genome duplication would be duplicated as part of the event and would be at higher ploidy ( $>1$ ). Conversely, mutations acquired after genome duplication would be present on one copy of DNA and reside at lower ploidy ( $\leq 1$ ).

As covered in part in the main text of the paper, we used the above approach to assess the dynamics of mutation accrual in polyploids. Approximately 76% (78/102, n=5 not available) of cases were enriched for C>T transitions in context of NpCpG trinucleotides related to ageing and the spontaneous deamination of 5-methyl-cytosine (referred to as Age-related). Seventeen percent of cases (n=17/102) harboured more or less balanced distribution of all six classes of base substitutions (C>A, C>G, C>T, T>A, T>C, T>G), a signature associated with DNA double-strand break repair (referred to as DSBR) of which half possessed mutations in *BRCA1/2*. The proportion of Age-related and DSBR cases did not differ amongst polyploids and diploids (Age-related: poly vs. dip - 74% vs. 78%,  $p=0.19$ ; DSBR: 17% vs. 16%,  $p=0.21$ , Fisher's exact test; Extended Data Fig. 3d). In DSBR cases, a slightly higher proportion of mutations were acquired before polyploidization (median: before - 58%, after - 47%;  $p=0.02$ , t-test; Fig. 1c). Age-related cases, which represent the bulk of this group, displayed a marked effect of accumulating most of their mutations while they were still diploid (median: before - 65%, after - 42%;  $p=9.6 \times 10^{-7}$ , t-test; Fig 1b). Three of 102 cases displayed a distinct increase in C>A transversions, a signature not yet assigned to a specific aetiology (referred to as Signature 8<sup>2</sup>). All three cases with Signature 8 cases were polyploid and demonstrated a striking pattern of accumulating most mutations after polyploidization (median: before - 35%, after - 70%; Supplementary Fig. 7a). More studies are need on the Signature 8 cases to determine if this pattern would persist.

To determine if mutational signatures are stable in polyploids, we rederived the signatures separating the mutations that occurred before or after polyploidization. In cases where there was enough mutation data to perform this analysis, we established that most polyploids displayed a stable signature pattern in both the diploid and the non-diploid phases of tumour development (28/30; Supplementary Fig. 7d, left column), except in two cases where the attributed signature only came to dominate after polyploidization (1 DSBR and 1 Signature

8; Supplementary Figure 7d, middle and right columns). Thus, mutational signatures are largely unaffected by the genomic instability in polyploids.

### **Algorithm to detect chromothripsis - Chrom-AL**

Chrom-AL was designed based on the four features of chromothripsis: 1) focal CN oscillations that vary between a few states, 2) random joining of DNA breakpoints from all four types of structural rearrangements (tail-to-head [TH], head-to-head [HH], tail-to-tail [TT], head-to-tail [HT]), 3) intervening segments of LOH, and 4) clustering of rearrangement breakpoints. Chrom-AL can detect chromothripsis in presence of other rearrangement phenomenon such as breakage-fusion-bridge (BFB) (see methods below and online Chrom-AL solutions). The sensitivity of Chrom-AL can be shown with its ability to resolve chromothripsis events with as few as 7-10 structural variants (SVs) (Supplementary Fig. 8). By applying Chrom-AL to acute leukaemias, where chromothripsis is rare<sup>3,4</sup>, we verified that the algorithm does not overestimate the rate of such events. Only one of 50 acute leukemia genomes harboured such an event (Supplementary Fig. 9a).

### **Further details of chromothripsis in PC**

Using Chrom-AL, we found the chromothripsis rate in two independent cohorts of PC to be similar (60 - 65%; ICGC cohort is shown in Supplementary Fig. 10), dramatically higher than previous reports<sup>5</sup>. We used CELLULOID to distinguish CN changes under lower cellularity conditions of the ICGC cohort. The increased rate of chromothripsis reported here compared to previous reports<sup>5</sup> is likely due to the combined effect of the increased sensitivity of detecting CN events using CELLULOID on the backdrop of tumour-enriched genomes. We found that locally rearranged and unstable subtypes identified by Waddell *et al*<sup>5</sup> were particularly enriched for chromothripsis (Supplementary Fig. 9b,c; Supplementary Fig. 10 and Supplementary Table 2).

In our tumour-enriched genome cohort (n=107), a total of 192 chromosome level chromothripsis events were observed (2.7 events/case, range: 1-9; n=70/107 cases). Chromothripsis events varied markedly in size ranging from a few megabases to involving several whole chromosomes (Supplementary Fig. 11a,b). Chromothripsis was frequently observed alongside other cataclysmic processes such as BFB<sup>6</sup>, polyploidization or both (Supplementary Fig. 11c). *TP53* mutations were also associated with increased rate of chromothripsis (76% versus 36%; p=0.0002, Fisher's exact test; Extended Data Fig. 1e) as shown previously<sup>7</sup>. Whereas only 3% of events were localized to chr19, we observed a focal

amplification effect on *PAK4* (Extended Data Fig. 4b, bottom panel,  $p=0.003$ , Wilcoxon test), a kinase predicted to be a marker of gemcitabine sensitivity<sup>8,9</sup>. A survey of common tumour suppressor genes revealed that several resided in regions lost due to chromothripsis (e.g. *ARID1A*, *ARID1B*, *PTEN*, *RUNX1*, *SMARCB1*, *NF2*; Supplementary Fig. 12).

### **Description of Extended Data Fig. 5c**

We first approached this question by annotating two cases where a large number of CN alterations were observed. In Ashpc\_0008, a diploid tumour, five chromosomes harboured 71% of all CN alterations (chr14, chr6, chr18, chr3, chr20; Extended Data Fig. 5c). By tracking DNA rearrangements, we found these CN alterations were a result of two chromothripsis events; one that rejoined pieces of chr14, chr6 and chr8 (Extended Data Fig. 5c, ①), and the other that reconnected pieces of chr3 and chr20 (Extended Data Fig. 5c, ②). With recent evidence that chromothripsis is sustained and resolved in a single cell division<sup>10,11</sup>, we can infer that 71% of the CN changes in this tumour were derived from approximately two aberrant cell mitoses.

### **Patterns of cataclysmic events in metastatic progression (related to Extended Data Fig. 6)**

To investigate cataclysmic phenomena in disease progression, we analyzed the genomes of 15 distinct metastases from six cases. Five metastases, mainly from common PC metastatic sites such as the liver and lymph nodes, from three different cases were all polyploid (Extended Data Fig. 6a; Pcsi\_0380, Pcsi\_0378, Pcsi\_0386). In Pcsi\_0380, the primary tumour was also polyploid suggesting a polyploid clone seeded both metastases (Extended Data Fig. 6a, left). In Pcsi\_0407, we found the ploidy status of the two independent metastases to be discordant (Extended Data Fig. 6b). The lymph node metastasis was diploid (ploidy = 1.79), whereas the liver metastasis that was tetraploid (ploidy = 3.08). As the primary tumour was also diploid (ploidy = 1.83) in this case, we looked to the mutation data to determine if a diploid or a polyploid clone initiated the liver metastasis. We found that a subset of the diploid mutations (i.e. mutations that occurred before polyploidization) were unique to the liver metastasis suggesting that a diploid clone initially seeded the liver and accumulated mutations before undergoing polyploidization (Extended Data Fig. 6c). We cannot formally rule out that a polyploid clone from an unknown metastatic site seeded the liver; however, we believe this scenario unlikely as the liver is amongst the earliest sites to be seeded by the primary tumour.

## Reconstruction of rearrangement events in Pcsi\_0171

In addition to Ashpc\_0005 shown in Fig. 3, we also performed a detailed reconstruction of the events in one more case. In Pcsi\_0171, a diploid tumour, 43% (9/21) of all rearrangements were confined to chr9 and chr18 (Extended Data Fig. 8a). The crisscrossing rearrangements that connect the identical DNA copy state between these two chromosomes bear the hallmarks of chromothripsis. At a single time point in this tumour's development, a single copy of chr9 and chr18 were broken into tens of segments where most of chr9p and chr18q were lost. The retained pieces were repaired mostly through inversion type rearrangements. Notably, two of these inversions, one intrachromosomal denoting the left border of the event on chr9 (30.5 Mb, Extended Data Fig. 8b) and the other interchromosomal demarcating the right border on chr18 (35.3 Mb), were liable for the contemporaneous loss of *CDKN2A* and *SMAD4* (Extended Data Fig. 8c,d). This result cannot be explained under the current model of PC progression.

## Evidence for allelic losses preceding mutation in key preneoplastic driver genes, *TP53* and *SMAD4*

Thirty-eight of 192 chromothripsis events occurred on chromosomes where the three key tumour suppressor genes reside (chr9: *CDKN2A*; chr17: *TP53*, chr18: *SMAD4*; Extended Data Fig. 4a). These genes are commonly inactivated in a biallelic manner by diverse mechanisms of genetic inactivation (deletions, mutations, SVs). Overall, we observed LOH at *CDKN2A* (91%; 97/107), *TP53* (91%; 97/107) and *SMAD4* (86%; 92/107) at similar rates, comparable to the frequency of *KRAS* mutations in this cohort (90%; n=96/107) (Extended Data Fig. 1e). In 75% of cases, the second copy of *CDKN2A* was inactivated mostly due to an additional deletion event (56/107 homozygous dels; 24/107 mutation; Extended Data Fig. 1e). A second hit in *TP53* and *SMAD4* was found in 77% and 48%, respectively, predominately due to somatic mutations (*TP53*: 82/107 mutations; *SMAD4* – 35/107 mutation, 16/107 homozygous dels). Importantly, mutations in these key driver genes were not observed in the absence of allelic losses implying that the latter are obligatory for transformation.

This led us to examine the relative timing of allelic losses and mutations in these key driver genes. As homozygous deletions cannot be temporally ordered relative to one another under the current experimental design, we focused on *TP53* and *SMAD4*. Biallelic inactivation of both *TP53* and *SMAD4* occurs very early in tumour progression<sup>12</sup>; however we reasoned that

some cases in our cohort may harbour subclonal events in these genes. Among samples that had mutations in *TP53* and *SMAD4*, the corresponding allelic loss was at integer value (Supplementary Fig. 13a,c), supporting that these events are present in all cells. In 7% (n=6/82; Supplementary Fig. 13a,b) of *TP53* cases and 23% of *SMAD4* cases (n=8/35; Supplementary Fig. 13c,d), the mutation was not fully clonal, indicating that it occurred after the allelic loss. Direct evidence that mutations in *TP53* and *SMAD4* follow allelic losses in these genes comes from an analysis of a primary tumour and two matched metastases (Supplementary Fig. 14a). Here, the CN profile illustrating a single copy loss in *TP53* and *SMAD4* was constant in all sequential samples (Supplementary Fig. 14b), whereas the proportion of cells carrying *TP53* and *SMAD4* mutations was greater in the metastases than in the primary tumour (Supplementary Fig. 14c,d). This supports that the mutations transitioned to be fully clonal only in the metastases. This sample also had a chromothripsis event that deleted a copy of *CDKN2A* that was fully clonal by CN in both the primary and metastatic tumours (Supplementary Fig. 14e). Importantly, this suggests that the chromothripsis event resulting in the loss of *CDKN2A* preexisted the *TP53* or *SMAD4* mutations, and provides an alternate line of evidence that such catastrophic events occur early in tumourigenesis. These data provide evidence that allelic losses in *TP53* and *SMAD4* precede mutation in PC and corroborate the report by Luttges *et al*<sup>13</sup>. Generally, these findings reinforce a view that allelic losses are critical for transformation and mutations promote metastatic progression in PC<sup>14-16</sup>.



## Methods

### Ethics approval and sample acquisition

A total of 107 surgically resectable cases of pancreatic ductal adenocarcinoma were obtained via informed consent under the ICGC protocol from collaborating hospitals in Canada and the United States. 84 cases were obtained from University Health Network (Toronto, Canada), 14 cases from Mayo Clinic, 3 cases from University of Nebraska as part of a rapid autopsy program, 5 cases from Sunnybrook Health Sciences Centre (Toronto, Canada), and 1 case from McGill University (Montreal, Canada). Consent for WGS was obtained locally at each institute. At the Ontario Institute for Cancer Research, approval was obtained through the University Health Network Research Ethics Board (08-0767-T) and University of Toronto Research Ethics Board (#30024). Preoperatively, blood samples were collected for germline DNA. In cases where blood was not collected, duodenal mucosa or other non-cancerous tissue was collected post-operatively for germline DNA. Tumours were sectioned to confirm diagnosis of ductal adenocarcinoma and a piece was snap frozen in liquid nitrogen, and stored at  $-80^{\circ}\text{C}$  or  $-150^{\circ}\text{C}$  before proceeding with laser capture microdissection (LCM). For 21 cases (17 UHN, 4 Sunnybrook), fresh tumour material was dissociated and viably sorted at  $-150^{\circ}\text{C}$  (below). We obtained clinical follow-up on the majority of cases.

### Tumour cell enrichment

*Sample dissociation and cell sorting:* Freshly resected tumours were minced into fine pieces in 10cm tissue culture dishes using a razor blade. After mechanical dissociation, 9mL of RPMI (at 1% fetal bovine serum) was added. 1ml of 10X Collagenase/hyaluronidase mix (Stem cell technologies) was added to bring the volume to 10mL and the sample was placed at  $37^{\circ}\text{C}$  incubator. Every 20 mins, the tissue pieces in the culture dish were pipetted through narrowing orifices (ex 10mL then 5ml then 1mL pipet) for a total of 60 – 120 mins. The sample was then passed through a 70-150 micron nylon mesh, centrifuged and resuspended in dimethyl sulfoxide (DMSO - Sigma) based cryopreservation media (20% FBS/10% DMSO final) and placed at  $-150^{\circ}\text{C}$  for long-term storage.

For cell sorting, frozen vials of viable cells were thawed via dropwise addition of RPMI solution (IMDM + 20%FCS + DNaseI). Final concentration of DNaseI (Roche Applied Science, 10104159001) in RPMI solution was 200ug/mL. Post-thaw, cells were spun at low

RPM (~1000) for 20min at 4°C. After the spin, thawing solution was removed and cells were resuspended in 100uL of PBS+5% FBS for antibody staining for cell sorting. The following antibodies were used for cell sorting: GlyA FITC (BD bioscience, clone HIR2), CD140b PE (BD bioscience, clone 28D4), CD45 PC5 (Beckman Coulter, clone IM1833), EpCAM PerCP-eFluor710 (eBioscience, clone 1B7), CD31 PC7 (eBioscience, clone WM-59), CD90 (BD Biosciences, clone 5E10), CD34 APC7 (BD bioscience, clone 581, custom conjugation). Cell sorting was performed on the BD FACSAria III using 4-laser configuration.

*Laser capture microdissection:* Snap frozen tumour tissue embedded in OCT was cut into 8um sections and mounted on PEN-Membrane Slides (Leica). Sections were stained with diluted hematoxylin to distinguish tumour epithelium from stroma. A staff pathologist marked tumour sections and LCM was performed according to manufacturer's protocol on the Leica LMD7000 system. Specimens were collected by gravity - contact-free and contamination-free and directly placed in DNA lysis buffer.

## **Library Construction and Whole Genome Sequencing**

DNA from tumour enriched samples (flow sorted or LCM) was isolated according to standard protocols and quantified using Qubit Fluorometric system (Life Technologies). Genomic DNA (gDNA) from tumours that underwent cell sorting was subjected to Nextera Library Preparation (Illumina Inc) according to manufacturer's protocol. Briefly, 50ng of gDNA was resuspended in 20ul of Nuclease Free water, followed by addition of tagmentation buffer (25uL) and enzyme (5uL). The reaction was placed at 55°C for 5min. Clean-up of tagmented DNA was performed using Agencourt AMPure XP SPRI beads (Beckman Coulter). Illumina indexes and adaptors were added using limited PCR amplification (5 cycles), and followed by a second cleanup step using Agencourt AMPure XP beads (Beckman Coulter). Libraries were quantified using Qubit and analyzed using the Agilent Bioanalyzer High Sensitivity DNA Kit (Agilent Technologies, Santa Clara, CA, USA).

gDNA from tumours that underwent LCM were subjected to the KAPA Library Preparation. 50ng of Qubit (Life Technologies, Carlsbad, CA, Cat #Q32854) quantified gDNA was sheared to 300-500bp fragments using the Covaris S2 Ultra-sonicator (Covaris Inc., Woburn, MA, USA) followed by 1x volume AMPure XP SPRI bead cleanup (Beckman Coulter Genomics, Danvers, MA, USA). Libraries were constructed using enzymatic reagents from KAPA Library Preparation Kits (KAPA Biosystems, Woburn, MA USA) according to protocols as described in reference 17<sup>17</sup> for end repair, A-tailing, and adapter ligation. Adapter-ligated libraries were enriched using optimized PCR conditions by adding 3 µL of Illumina paired-end

enrichment primers (Integrated DNA Technologies, Coralville, Iowa, USA), 75  $\mu$ L of 2x KAPA HiFi HotStart ReadyMix (KAPA Biosystems, Woburn, MA, USA) and 33  $\mu$ L of nuclease-free water (Life Technologies, Carlsbad, CA, USA) to 36  $\mu$ L of eluted DNA and amplified across 3 individual PCR reaction tubes. Libraries were incubated in Verti 96-well Thermal Cyclers (Life Technologies, Carlsbad, CA, USA) for 45s at 98°C and cycled 10 times for 15s at 98°C, 30s at 65°C, and 30s at 72°C. Following a 0.6x SPRI bead clean-up (Agencourt AMPure XP beads), post-PCR enriched libraries were eluted in 30 $\mu$ L of elution buffer (Qiagen, Hilden Germany, Cat#19086) and validated using Agilent Bioanalyzer High Sensitivity DNA Kit (Agilent Technologies, Santa Clara, CA, USA).

Prior to sequencing, both Nextera and KAPA libraries were quantified on the Illumina Eco Real-Time PCR Instrument (Illumina Inc., San Diego, CA, USA) using qPCR according to the standard manufacturer's protocol (Illumina Inc). Paired-end cluster generation and sequencing was carried out for all libraries on the Illumina HiSeq 2000/2500 platform using high-throughput (a) 2X101 cycles (Illumina Inc., San Diego, CA, USA) and (b) 2X126 cycles (Illumina Inc., San Diego, CA, USA), combined with rapid run (c) 2X101 cycles (Illumina Inc., San Diego, CA, US). Samples were sequenced with the number of lanes predicted to yield a collapsed coverage of 50x and 30x for tumour and normal samples, respectively. Post-sequencing, insert size of DNA fragments for each run was monitored to ensure that there were minimal to no differences between the two different library preparation methodologies. In our analysis, we never observed any biases in calling of somatic variants, copy number or structural variants between these methodologies.

### **Immunohistochemistry and Fluorescence In-Situ Hybridization**

Dual-colour interphase FISH was performed on whole mount paraffin sections using in-house brewed probes for *smad4* gene and commercial probes for KRAS (not shown), p53 and p16/CEP9 (not shown). Two BAC clones RP11-729G3 (starts 48,478,290 ends 48,634,496) and RP11-348N10 (48,542,628 - 48,715,868) - actual probe size 48,611,411 - that correspond to the 18q21.2 region containing *SMAD4* gene (starts 48,556,583 ends 48,611,411) were selected from the Human UCSC Genome Browser assembly (Feb.2009 CRch37/hg19) and obtained from TCAG Genome Resource Facility (Sickkids Hospital, Toronto, Canada). Nick translation kit (Abbott Laboratories, Abbott Park, Illinois, USA) was used to directly label BAC clones with SpO fluorochrome according to the manufacturer's protocol while CEP18 labeled in green (Abbott Laboratories, Abbott Park, Illinois, USA) served as an internal control. Probes were verified on normal blood metaphases to confirm their correct localization. A commercially

available LSI *CDKN2A* Spectrum Orange probe with CEP9 Spectrum Green included as internal control was used to identify copy numbers of p16/*CDKN2A* gene (Abbott Laboratories, Abbott Park, Illinois, USA), *KRAS* labeled in red was purchased from Agilent (Agilent Technologies, Santa Clara, CA, USA) and combined with CEP12 SpG (Abbott Laboratories, Abbott Park, Illinois, USA). *TP53*-17p13 labeled in orange and copy control 17 labeled in green were bought from CymoGen DX (Biocare medical (CymoGen DX), Concord, CA, USA). FISH was performed by standard methods using the probes described above. Briefly, slides were deparaffinized in Xylen, incubated in Cytric buffer (pH=6.0) for 35 minutes at 80°C and digested with pepsin (Sigma, 75,000 U in 0.01N HCl) for 13-17 minutes at 37°C followed by codenaturation for 7 minutes at 75°C. Hybridization was conducted at 37°C for 2 days. After washings slides were counterstained with 4',6-Diamidino-2-phenylindole, dihydrochloride (DAPI). A Zeiss Imager.M1 microscope (Carl Zeiss Canada Ltd., Canada) equipped with a camera (JAI Inc., San Jose, CA, USA) and the MetaSystems Isis FISH Imaging System (MetaSystems GmbH, Altlussheim, Germany) was employed for manual signal analysis and image capturing. For *TP53/SMAD4* FISH: Two BAC clones for *SMAD4* (see above) were labeled with SpG and RP11-89D11 (7,571,720 -7,663,042) that correspond to the 17p13.1 region containing *TP53* gene (starts 7,571,720 ends 7,590,868 -Human UCSC Genome Browser assembly (Feb.2009 CRch37/hg19) was labeled with SpO.

Immunohistochemistry: Paraffin sections at 4um thickness were dried in a 60°C oven overnight before staining. The immunohistochemistry (IHC) was performed according to the manufacture's guidelines using BenchMark XT-an automated slide stainer (Ventana Medical System) with standard (or mild) antigen retrieval (CC1,Tris/Borate/EDTA pH8.0, #950-124) or with protease1 (760-2018) for 4 minutes. The concentration for EpCAM (eBioscience, clone 1B7) was 1/100 for 60 minutes. Ventana Ultraview Universal DAB Detection Kit (#760-500) was utilized. The complex is then visualized with hydrogen peroxide substrate and 3, 3'-diaminobenzidine tetrahydrochloride (DAB) chromogen. The slides were counterstained with Ventana Hematoxylin II and Bluing reagent, dehydrated in graded alcohol, cleared in xylene and coverslipped in Permount.

### **Sequence alignment, variant calling and structural variants**

The data was aligned to the GRCh37.p0 reference including random contigs using Burrows-Wheeler Aligner (BWA) v0.6.2<sup>18</sup>. Multiple lanes of the same sample were sorted, merged and duplicates were marked across libraries using Picard v1.90 (<http://broadinstitute.github.io/picard>).

Germline single nucleotide polymorphisms (SNPs) were called using the Genome Analysis Toolkit (GATK) v1.3.16<sup>19</sup>. In brief, the data was locally realigned around indels and the base quality values were recalibrated prior to variant calling using the Unified Genotyper. The data was then filtered using the VariantFiltration module. Mutations with a QUAL score of greater than 50 in the normal sample were classified as germline variants. In all cases the tumour and matched normal samples were processed simultaneously. Strelka v1.0.7<sup>20</sup> was used to call somatic SNVs using default settings. The Tier 1 SNVs were utilized for all downstream analysis. All mutations were annotated with dbSNP v142 (<http://www.ncbi.nlm.nih.gov/SNP/>) and COSMIC v64 (<http://cancer.sanger.ac.uk/cosmic>). Protein coding consequences were predicted for each mutation using ANNOVAR v2013-06-21<sup>21</sup>.

Structural variants (SVs) were called using both Crest vAlpha<sup>22</sup> and Delly v0.5.5<sup>23</sup>. Custom in-house scripts filtered for high confident SVs from their respective tools. The union of the high confident SVs were then utilized for all downstream analysis. In all cases default parameters were used unless otherwise specified.

## **Mutational Signatures**

Mutation signatures were derived as previously described<sup>2</sup>.

## **CELLULOID: Evaluation of tumour cellularity, tumour ploidy, and absolute copy number profiles**

After alignment, reads are counted in 1 kbp bins using functions from the R package HMMcopy. These counts are then adjusted for the GC content of each bin using LOESS (local) regression and scaled to the mean (scaled GC-corrected read count [SRC]). Segmentation of the data in both tumour and normal tissue (say, from matched non malignant tissue or from blood) is performed using penalized least squares, as implemented in the R package copynumber. To each segment is assigned the mean SRC value, calculated from the bins within the segment. SRC is proportional to the mean number of chromosomes (copies), averaged over all sequenced cells.

Germline heterozygous positions are extracted in the autosome, except in regions of the genome where duplication or deletion events are observed in the normal tissues. The number of reads supporting each allele (the reference allele – the one observed on the reference human assembly – and the alternate allele) is recorded from the tumour data and the allelic ratio (AR; the proportion of reads supporting the reference allele) calculated. Each heterozygous position is also paired with the SRC value of the segment it belongs to, evaluated from the tumour

data, to form pairs of values (SRC, AR). These pairs of points are represented in a three-dimensional graph as a contour (elevation) plot (Fig. 2). This figure is a visual representation of the autosomal-wide copy number profile of the tumour. Each peak (or pair of peaks since the graph is reflected around AR=0.5) corresponds to a specific copy-number state that summarizes both the total copy number (on the x-axis, once appropriately scaled) and the ratio of relative abundance of maternal and paternal copies (on the y-axis, once contamination from normal tissues - or tumour cellularity - is accounted for). The relative positions of these peaks can be mathematically derived in the following way.

Let us define the autosomal ploidy of a *sequenced sample* (that includes both tumour and possibly contamination from normal cells) as

$$P = \frac{1}{N_B} \sum_b c_b$$

where  $c_b$  represents the mean number of chromosomal copies at base  $b$ , averaged over all cells, and  $N_B$  is the number of autosomal bases. This can be interpreted as the relative abundance of autosomal DNA in the sequenced sample compared to a normal (reference) haploid autosomal genome. We aim to use the SRC values to estimate the ploidy. Re-writing the above as

$$P \approx K \times \frac{1}{N_{bins}} \sum_{bin} SRC_{bin}$$

(where  $K$  is a scaling constant) is not informative since the SRC values are scaled and relative, making this expression trivial. However, because SRC are scaled to the mean, bins that fall in regions of exactly  $P$  copies (averaged over all cells) are expected to display SRC values of 1. Let  $S$  be the value of SRC that would be expected in regions where all cells display 2 copies of chromosomes (such regions do not need to actually exist in the sequenced sample). Because of proportionality, we have the relationship

$$P = \frac{2}{S},$$

thus, ploidy can be evaluated by finding  $S$ .

Consider the more general case of a sequenced sample that consists of a proportion  $n$  of normal cells and  $t$  of tumour cells ( $n+t=1$ ). Because ploidy may differ in normal and tumour cells, these percentages *are not* equivalent to percentages of reads originating from normal or tumour cells. Consider a segment in the genome that is present in 2 copies in the normal cells and an average of  $T$  copies in the tumour cells. The tumour cells can be further broken down in subclones, in proportions  $t_1, t_2, \dots (t = t_1+t_2+\dots)$ , each subclone displaying a different number of copies ( $T_1, T_2, \dots$ ). Then, by proportionality, the SRC of bins in that segment are expected to take the value

$$\frac{S}{2} \times (2n + T_1 t_1 + T_2 t_2 + \dots)$$

(Eq. 1). To determine the expected AR of heterozygous positions in that segment, the number of copies need to be further broken down into number of maternal and paternal copies:  $T_i = M_i + P_i$ . Normal cells are assumed to have one maternal chromosome and one paternal chromosome. In a segment that displays  $M_i$  maternal and  $P_i$  paternal copies in subclone  $i$ , the AR is expected to take the value

$$\frac{n + M_1 t_1 + M_2 t_2 + \dots}{2n + T_1 t_1 + T_2 t_2 + \dots}$$

(Eq. 2) if, say, the maternal chromosome carries the reference allele, and reflected around 0.5 otherwise. Let

$$EP(S, n, t, M_1, P_1, M_2, P_2, \dots)$$

represent the (x,y) coordinates described in Eq. 1 and 2. Let  $OP = \{OP_i\}$  be the set of observed contour plot peaks (or subset of peaks deemed of particular interest by the user). The algorithm used to estimate  $S$ ,  $n$  and  $t$  finds parameters that minimize the total distance between the observed peaks and the EP coordinate closest to each. In other words, if

$$d_i(S, n, t) = \min_{M_1, P_1, M_2, P_2, \dots} |OP_i - EP(S, n, t, M_1, P_1, M_2, P_2, \dots)|,$$

then the algorithm consists on finding  $S$ ,  $n$  and  $t$  that minimize

$$\sum_i d_i(S, n, t).$$

In practice, the number of expected peak locations grows exponentially with the number of subclones and the number of maternal/paternal configurations. The algorithm further depends on a set of allowed copy-number configurations (a set of  $M_i$  and  $P_i$ ) that can be set by the user. For example, the user might want to ignore configurations where the number of maternal chromosomes is smaller than the number of paternal chromosomes in one subclone but higher in another; this would reduce the number of possible ARs. Other restrictions may include situations where the number of copies between different subclones cannot differ (by difference or by ratio) by more than some specified threshold.

The objective function to be minimized is not convex and multiple local minima exist. Optimization is done either by simulated annealing if a global minimum is desired (using the *R* package GenSA) or using the *R* built-in function `optim` with grid-defined starting points to survey and inspect a set of local minima.

Once values for  $S$ ,  $n$  and  $t$  are obtained, the ploidy in the *tumour* cells ( $P_T$ ) can then be calculated as

$$P_T = \frac{P - 2n}{1 - n}$$

where  $P=2/S$  is the ploidy of the whole sample that was sequenced. The SRC values can be rescaled into their corresponding integer copy number in tumours using Eq. 1 above.

The above describes the current implementation of an *R* package named CELLULOID, which can be obtained from <http://github.com/mathieu-lemire>.

### **The interconnection between tumour ploidy and sample cellularity**

Tumor ploidy and sample cellularity estimates are interconnected: while the ploidy of a tumor can always be doubled and still provide copy-number segments at integer levels (albeit only at even values), the estimate of cellularity would have to be decreased. Indeed, in order to maintain an allelic ratio at a given value, the proportion of tumor cells has to be reduced to compensate the higher number of copies in them (from a cellularity value  $t$  to a value  $t/(2-t)$  in



the case of a doubling of the ploidy). A test (e.g. Kruskal-Wallis) can thus be designed to verify that ploidy estimates have not been systematically over- or underestimated, simply by comparing the distribution of cellularity estimates stratified by ploidy.

To compare CELLULOID's calls with other software, we ran TITAN<sup>24</sup> on the tumors to get estimates of ploidy and cellularity. We varied the number of clonal clusters from 1 to 2, and for each, starting values for ploidy were set at 2, 3.5 and 5.5. Of the 6 possible solutions, we chose the one that was associated with the smallest validity score index. For the selected 12 tumors that were validated using FISH (Supplementary Figures 16 and 17), we present in Supplementary Figure 17 the contour plots of their copy number profiles, overlaid with expected peak locations calculated from equations presented in Methods, calculated from TITAN's estimates of tumor ploidy and tumor cellularity; the majority of the solutions based on minimum validity index alone appeared to inadequately capture the tumor copy number profiles (Supplementary Figure 17, left column). We note that for the large majority of tumors, curation of TITAN's possible solutions by inspection of the copy number profile would reveal a solution that is in close proximity to the call made by CELLULOID (Supplementary Figure 16; Supplementary Figure 17, second and third panels), with the exception of high ploidy calls and the apparent underestimation of cellularity by TITAN compared to CELLULOID.

### **Chrom-AL: Algorithm to detect cataclysmic genetic events**

Chrom-AL is an in-house tool developed to standardize the detection of complex rearrangement patterns linked to chromothripsis<sup>10</sup>. Chrom-AL applies a series of statistical tests and thresholds at the level of the chromosome and also within the windows of the structural events to infer a call. We inspected 80 genomes manually and estimate that the false-positive and false-negative rate of Chrom-AL is approximately ~7% and ~8%, respectively, in our data set. The tool is designed based on the chromothripsis criteria presented by Korbil and Campbell<sup>25</sup>. Complex rearrangement patterns can often involve multiple distinct types of mitotic errors (ex. FoSTeS, MMBIR) including a chromothripsis event<sup>10,11,26</sup>. Chrom-AL is not designed to distinguish chromothripsis from other replication based mitotic errors, which can also be catastrophic occurring within one or few cell divisions. As such, we use the term chromothripsis to broadly refer to a 'one-off' mitotic catastrophe.

As chromothripsis events typically increase the number of SVs in a genome, there is a correlation between tumours with increased numbers of SVs and rate of chromothripsis<sup>7</sup>. Thus, proper SV calling becomes a critical parameter in implementation of any algorithm to call chromothripsis. Despite this correlation, a high rate of SVs does not necessarily imply a

chromothripsis event. Thus, the false positive and false negative rates of Chrom-AL will likely vary with the overall rate of SVs that differs amongst tumour types. For this reason, visual inspection still remains a critical tool in evaluating such events. Chrom-AL does not detect chromothripsis events that are predominately driven by a single SV type. For example, on rare occasions, we observed the typically CN oscillation hallmark of chromothripsis that was connected mostly by HH or TT inversions. Whether such rearrangements were indeed accumulated over time or all at once is not known. To remain consistent with the criteria discussed below, we excluded these events from the analysis. Below, we describe the criteria and conditions used to detect cataclysmic events by Chrom-AL. Chrom-AL was implemented in R.

### **Tests for Catastrophic Events:**

#### **1) Threshold for number of structural variants (SVs) and copy number (CN) alterations (chromosomal level)**

Catastrophic events typically have large numbers of SVs and CNs changes. Only events with at least 7-8 SV and 8 CN segments were considered in the analysis.

#### **2) Clustering of breakpoints (chromosomal level)**

Catastrophic events are typically localized to particular genomic regions that can be assessed statistically. To do this, we ordered the breakpoints sequentially and calculated the distances between each breakpoint. The distribution of distances were compared against the exponential distribution as described by Korbel and Campbell<sup>25</sup> using a Kolmogorov-Smirnov (KS) test and followed by Bonferroni correction. Regions with a  $q \leq 0.1$  were considered to display evidence of breakpoint clustering.

#### **3) Chromosomal breakpoint enrichment (chromosomal level)**

We observed several instances where SVs comprising a catastrophic event were scattered chromosome wide and did not cluster within a particular region of a chromosome. Thus, they failed the KS test described above. To account for this shortcoming, we performed an additional test to determine if SVs were enriched on any particular chromosome than would be expected by chance. To identify chromosomes enriched for SVs, a hyper-geometric test was run on each chromosome based on all the breakpoints identified in the tumour. This was followed by a Bonferroni correction. Chromosomes with a  $q \leq 0.1$  were identified as having a high rate of breakpoints.

#### **4) Join Distribution (chromosomal and window level)**

In paired end sequencing, all SVs can be categorized into 4 read-pair orientations based on the direction of the + or - reads: tail-to-head [+/-, TH], head-to-head [-/-, HH], tail-to-tail [+/+, TT], head-to-tail [-/+, HT]. Pairs in standard orientation (+/-) are considered to be a deletion type SV with a TH join. Duplication type SVs are in the reverse orientation -/+ and defined by a HT join. Inversions can be both in the forward (+/+) orientation or reverse (-/-) orientation. In the forward orientation, they were defined as TT and in the reverse orientation they were defined as HH. Using read-pair information for SVs, we classified each SV based on their segment joins. In a catastrophic event, we expect SVs of all 4 types to be present. For each region we tested this hypothesis. To initially run the test, we required at least 1 type of read-pair join from each of the 4 subtypes to be present. A multinomial test, from the EMT v1.1 package, was run to test the distribution of segment joins against an equal distribution. The regions with a p-value > 0.05 were considered to show evidence of equal distributions of segment joins.

#### **5) CN Oscillations (chromosomal and window level)**

Catastrophic events typically display oscillations in CN that vary between a few states. However, when chromothripsis is coopted with BFB cycles as part of a single catastrophic event, there will be some segments in the event that will oscillate between limited CN states versus other segments that may appear to increase in a stepwise manner. To be categorized as a bona-fide 'one-off' event, there must be some sequential segments that retain an oscillation pattern. We required at least 4 sequential segments in any catastrophic event must oscillate between two different states. Due to polyploidization, the amplitude of the CN step was defined to be variable (1, 2 or more).

#### **6) Interspersed LOH (chromosomal and window level)**

Chromothripsis drives CN losses, and thus CN oscillations should correspond to interspersed loss of heterozygosity (LOH). To test for LOH, we identified all the high confident germline heterozygous SNPs in the genome and determined the allelic ratio in the tumour sample. The distributions of allelic ratios between each sequential CN segments were compared using a t-test. A minimum of 10 positions had to be identified within each CN segment to be processed otherwise those segments were excluded from

the analysis. A bonferroni correction test was run. Those segments with a  $q \leq 0.1$  were considered significantly different. To show evidence of interspersed LOH, at least 4 comparisons had to be made (thus at least 5 CN segments had to be present in the region). At least 50% of the compared segments had to show some significant difference in the distribution of allele ratio to be classified as showing interspersed LOH.

### **Chromosome level analysis:**

Genomic regions were first evaluated at the chromosome level. For each sample, all chromosomes were independently evaluated for the above tests. For tests 2 and 3, we used CN breakpoints for segments where a matching SV could not be mapped. The importance of this point is shown in Fig. 4a (Ashpc\_0008, event 2). In this case, there was a chained chromothripsis event connecting chromosomes 3 and 20. On chr 3, the left edge of at 42.8 Mb was part of the chromothripsis event but the corresponding SV to this CN loss is not mapped. This was also the case for the right edge of the chromothripsis event on chr20 (7.1Mb). In this scenario, CN breakpoint was critical to utilize in the tests to decipher whether this was indeed a chromothripsis event. If CN breakpoints are not integrated into the analysis, such events would go undetected or be misclassified. We found that including CN breakpoint was necessary to properly establish the DNA windows of chromothripsis events, especially when SVs could not be properly mapped (discussed below).

### **Identification of DNA rearrangement windows:**

The next step was to identify the borders of the catastrophic event on each chromosome. Catastrophic events typically display overlapping SVs throughout the region of the event. To localize the chromosomal window where the catastrophic event occurred, we selected the left and right borders of overlapping SV breakpoints. SVs resulting in translocations were used to establish the rearrangement window when at least two independent translocations were detected between the same two chromosomes. In this manner, we could establish inter- and intra-chromosomal windows to facilitate the segregation of multi-chromosome events from single-chromosome events. Each window was flanked with 6kbp on either end. The windows that define each candidate catastrophic event were used for downstream analysis.

### **Window Level Analysis:**

A window was first scored on whether there were at least 8 SVs present within the window. Each window was then evaluated for tests 4-6.

### **Classification of single chromosome versus multi-chromosome catastrophic event:**

Single chromosome catastrophic events were classified when all SVs within a window occurred on the same chromosome. In the case of translocations, at least 2 SV had to have occurred between the same two chromosomes to be considered a multi-chromosome event. If more than 2 chromosomes were involved, each chromosome had to have SVs occurring with  $n-2$  of the other chromosomes, where  $n$  refers to the total number of chromosomes involved, to be considered part of the chain.

### **Event (CR1 vs. CR2)**

Each window was independently scored. If a window was classified as a catastrophic and was involved in a multi-chromosome event, both windows on either side of the translocation were considered to be catastrophic at the chromosomal level but were counted as a single catastrophic event. Through a large number of iterations where the tests described above were iteratively optimized, we established two distinct criteria maximize sensitivity and specificity of detection.

### **Criteria 1 (CR1)**

To be classified as an event under CR1, a region had to pass at least 5 of the 6 chromosomal level tests (test 1-6). A window had to be identified with at least 8 SV and the window had to pass the segment join and the interspersed LOH test (test 4 and 6).

### **Criteria 2 (CR2)**

To be classified as event under CR2, a region had to pass at least 5 of following test: the 6 chromosomal level tests (test 1-6), the identification of a window with at least 8 SV, the window segment join and the window interspersed LOH test (test 4 and 6). In addition to these conditions, the window had to have at least 7 SV events and had to pass window oscillation (criteria 5).

### **Timing of copy number and mutations in polyploid tumours**

CN alterations were classified according to whether they occurred 'before' or 'after' genome duplication. Although this analysis is more accurately tetraploids (due to the number of limited paths to a give final CN state in tetraploids), we did perform analysis on hexaploids

(Supplementary Fig. 7b,c). In the case of deletions, a copy state of 0 implies an event that occurred prior to genome duplication. According to the most parsimonious interpretation, a copy state of 1 and 3 implies CN changes that occurred after genome duplication. To determine the relative timing CN alterations that resided at a state of 2, we used germline allelic ratios. A CN of 2 at LOH was considered to be a CN loss that occurred before genome duplication. However, lack of LOH was considered to be an alteration that occurred after genome duplication. For amplifications, events at even CN state were considered to be alterations that occurred before genome duplication versus those with odd CN states were considered to occur after, and consistent with criteria used previously<sup>27</sup>.

To time somatic mutations, we looked only at the mutations that fell within regions that had a copy state of 4. At each of these positions, we calculated the number of mutated copies found in the cell using the following formula that accounts for the cellularity of the sample.

$$\text{Somatic AR} = \frac{t * k}{(t * (m + p)) + (n * 2)}$$

Where the  $t$  is fraction of tumour in the sample (cellularity),  $n$  is the fraction of normal in the sample,  $k$  is the number of mutated copies,  $m$  is the number of maternal copies and  $p$  is the number of paternal copies. Mutations with greater than 1 copy were deemed to occur before genome duplication because they lie on multiple copies. On the other hand, mutations that lie on 1 copy were considered to occur after genome duplication.

## Statistical Analysis

To test whether any chromosomes were statistically enriched for chromothripsis events, we performed Monte Carlo sampling. The 192 detected chromothripsis events were randomly scattered across the genome using a multinomial distribution assuming an equal probability of hitting each chromosome. We did not account for chromosome size, as the recently identified mechanism of chromothripsis suggests that such events are independent of size of the chromosome as any size piece of a chromosome or whole chromosomes can get caught in micronuclei<sup>10</sup>. The test was iterated 100,000 times. For each chromosome, we identified the number of times a value greater than or equal the observed value was spotted for each chromosome (Fig. 3b). To infer a p-value, the fraction of the simulated observation per chromosome over the total number of tests was used. For instance, we detected 22 samples

with a chromothripsis event on chr18. In only 49 replicates ( $p=0.00049$ ; 49/100,000) did we observe at least one chromosome (any) displaying chromothripsis in 22 or more simulated samples, illustrating that results on chr18 are robust to multiple testing issues.

### **Data Availability**

Raw data (fastq files) and clinical information on the patient cohort are available from the International Cancer Genome Consortium (ICGC) data portal at <http://dcc.icgc.org>.

## References:

1. Jäger, N. *et al.* Hypermutation of the inactive X chromosome is a frequent event in cancer. *Cell* **155**, 567–581 (2013).
2. Alexandrov, L. B. *et al.* Signatures of mutational processes in human cancer. *Nature* **500**, 415–421 (2013).
3. Cancer Genome Atlas Research Network. Genomic and epigenomic landscapes of adult de novo acute myeloid leukemia. *The New England journal of medicine* **368**, 2059–2074 (2013).
4. Papaemmanuil, E. *et al.* RAG-mediated recombination is the predominant driver of oncogenic rearrangement in ETV6-RUNX1 acute lymphoblastic leukemia. *Nature genetics* (2014). doi:10.1038/ng.2874
5. Waddell, N. *et al.* Whole genomes redefine the mutational landscape of pancreatic cancer. *Nature* **518**, 495–501 (2015).
6. Campbell, P. J. *et al.* The patterns and dynamics of genomic instability in metastatic pancreatic cancer. *Nature* **467**, 1109–1113 (2010).
7. Rausch, T. *et al.* Genome Sequencing of Pediatric Medulloblastoma Links Catastrophic DNA Rearrangements with TP53 Mutations. **148**, 59–71 (2012).
8. Moon, S.-U. *et al.* p21-Activated Kinase 4 (PAK4) as a Predictive Marker of Gemcitabine Sensitivity in Pancreatic Cancer Cell Lines. *Cancer Res Treat* (2014). doi:10.4143/crt.2014.054
9. Chen, S. *et al.* Copy number alterations in pancreatic cancer identify recurrent PAK4 amplification. *Cancer Biol. Ther.* **7**, 1793–1802 (2008).
10. Zhang, C.-Z. *et al.* Chromothripsis from DNA damage in micronuclei. *Nature* (2015). doi:10.1038/nature14493
11. Maciejowski, J., Li, Y., Bosco, N., Campbell, P. J. & de Lange, T. Chromothripsis and Kataegis Induced by Telomere Crisis. *Cell* **163**, 1641–1654 (2015).
12. Iacobuzio-Donahue, C. A., Velculescu, V. E., Wolfgang, C. L. & Hruban, R. H. Genetic basis of pancreas cancer development and progression: insights from whole-exome and whole-genome sequencing. *Clinical cancer research : an official journal of the American Association for Cancer Research* **18**, 4257–4265 (2012).
13. Lüttges, J. *et al.* Allelic loss is often the first hit in the biallelic inactivation of the p53 and DPC4 genes during pancreatic carcinogenesis. *The American journal of pathology* **158**, 1677–1683 (2001).
14. Iacobuzio-Donahue, C. A. *et al.* DPC4 gene status of the primary carcinoma correlates with patterns of failure in patients with pancreatic cancer. *J. Clin. Oncol.* **27**, 1806–1813 (2009).
15. Weissmueller, S. *et al.* Mutant p53 Drives Pancreatic Cancer Metastasis through Cell-Autonomous PDGF Receptor  $\beta$  Signaling. *Cell* **157**, 382–394 (2014).
16. Whittle, M. C. *et al.* RUNX3 Controls a Metastatic Switch in Pancreatic Ductal Adenocarcinoma. *Cell* **161**, 1345–1360 (2015).
17. Fisher, S. *et al.* A scalable, fully automated process for construction of sequence-ready human exome targeted capture libraries. *Genome biology* **12**, R1 (2011).
18. Li, H. & Durbin, R. Fast and accurate short read alignment with Burrows-Wheeler transform. *Bioinformatics (Oxford, England)* **25**, 1754–1760 (2009).
19. DePristo, M. A. *et al.* A framework for variation discovery and genotyping using next-generation DNA sequencing data. *Nature genetics* **43**, 491–498 (2011).
20. Saunders, C. T. *et al.* Strelka: accurate somatic small-variant calling from sequenced tumor-normal sample pairs. *Bioinformatics (Oxford, England)* **28**, 1811–1817 (2012).
21. Wang, K., Li, M. & Hakonarson, H. ANNOVAR: functional annotation of genetic variants from high-throughput sequencing data. *Nucleic acids research* **38**, e164–e164 (2010).
22. Wang, J. *et al.* CREST maps somatic structural variation in cancer genomes with base-pair resolution. *Nature methods* **8**, 652–654 (2011).
23. Rausch, T. *et al.* DELLY: structural variant discovery by integrated paired-end and split-read analysis. *Bioinformatics (Oxford, England)* **28**, i333–i339 (2012).
24. Ha, G. *et al.* TITAN: inference of copy number architectures in clonal cell populations from tumor whole-genome sequence data. *Genome Res.* **24**, 1881–1893 (2014).
25. Korbel, J. O. & Campbell, P. J. Criteria for Inference of Chromothripsis in Cancer Genomes. **152**, 1226–1236 (2013).



26. Li, Y. *et al.* Constitutional and somatic rearrangement of chromosome 21 in acute lymphoblastic leukaemia. *Nature* **508**, 98–102 (2014).
27. Zack, T. I. *et al.* Pan-cancer patterns of somatic copy number alteration. *Nature genetics* **45**, 1134–1140 (2013).
28. Vogelstein, B. *et al.* Cancer Genome Landscapes. *Science* **339**, 1546–1558 (2013).
29. Nik-Zainal, S. *et al.* The Life History of 21 Breast Cancers. *Cell* **149**, 994–1007 (2012).

## Supplementary Figure and Table Legends

**Supplementary Figure 1:** In Ashpc\_0027, a focal set of SVs resembling a mitotic catastrophe which included cycles of BFB resulting in the concurrent loss *SMAD4* and gain in *GATA6*.

**Supplementary Figure 2: Survival analysis of patient cohort used in this study.** (a) Kaplan-Meier curve for overall survival for cases with (blue) and without chromothripsis (red). The poor prognosis associated with chromothripsis was maintained in multi-variable analysis including traditional prognostic factors of tumour stage and grade. The survival curves include an additional 41 cases that were sequenced during the course of our analysis (n=148; Connor et al., manuscript submitted). (b) The wide spectrum of chromothripsis events (from 8 SVs to 100s) prompted us to perform a basic analysis based on the median number of SV rearrangements in our tumour cohort (SV high > 70 rearrangements; SV low ≤ 70 rearrangements; 70 patients in each group). p values were derived using log-rank test. However, further studies with larger patient cohorts will be required to establish the prognostic value of chromothripsis in PC.

**Supplementary Figure 3:** The data presented here is related to the analysis presented in Fig. 3 and Extended Data Fig. 7. (a) Copy number profile of chr17 and chr18 from the heart (hr) metastasis (Pcsi\_0410) showing that *TP53* and *SMAD4* genes are at copy number of 2 but at LOH due to a ploidy event (shown in Extended Data Fig. 7). (b) FISH validation for copy number of *TP53* and *SMAD4* genes in the heart metastasis and primary tumour. This confirms that the primary tumour was polyploid. FISH probes overlap *TP53* and *SMAD4* genes (shown as black line in a). (c) Chromosome rearrangement plot depicting an additional chromothripsis event specific to the adrenal gland (ag) metastasis in Pcsi\_0410. The copy number step in the chromothripsis event is one indicating that it occurred after polyploidization event in Pcsi\_0410. hr – heart.

**Supplementary Figure 4: Summary of all cases where a simultaneous event affected classical driver genes in PC evolution (*KRAS*, *CDKN2A*, *TP53*, *SMAD4*).** Single unbalanced translocations are included in these analyses because, by definition, such events are simultaneous similar to chromothripsis. (a) Ashpc\_0003: *CDKN2A* and *SMAD4*. (b) Ashpc\_0017: *TP53* and *SMAD4*. (c) Ashpc\_0026: *TP53* and *SMAD4*. (d) Pcsi\_0227: *TP53* and *SMAD4*. (e) Pcsi\_0326: *TP53* and *SMAD4*. (f) Pcsi\_0239: *CDKN2A* and *SMAD4*. (g) Pcsi\_0297: *TP53* and *SMAD4*. (h) Pcsi\_0492: *TP53* and *SMAD4*. (i) Ramp\_0007: *CDKN2A* and *SMAD4*. (j) Pcsi\_0236: *CDKN2A* and *SMAD4*. (k) Pcsi\_0078: *KRAS* and *CDKN2A*. (l) Pcsi\_0078: *KRAS* and *SMAD4*. (m) Pcsi\_0294: *TP53* and *SMAD4* loss. (n) Pcsi\_0102: *TP53* and *SMAD4* loss. (o) Pcsi\_0312: *TP53* and *SMAD4* loss.

**Supplementary Figure 5: Design of flow sorting scheme used to distinguish tumour epithelial cells from stromal cells.** (a) Gating strategy to purify tumour epithelial cells (EpCAM+), lymphocytes (CD45+), endothelium (CD31+CD34+), and fibroblasts (CD90+CD140b+) from primary pancreas ductal adenocarcinoma. Viable cells were gated based on propidium iodide staining. (b) Whole genome sequencing was performed on lymphocytes and fibroblasts to demonstrate that these lineages are not tumour derived. Representative IGV plot of the *KRAS* mutation from purified tumour cells, lymphocytes and fibroblasts is shown.

**Supplementary Figure 6: Rationale used to distinguish diploid and polyploid tumours by CELLULOID.** (a) Scenarios of CN events where heterozygosity is retained (i) or lost (LOH) in a diploid tumour. (b) Scenarios of CN events where heterozygosity is retained (i), or

lost (ii-iv) due to CN alterations that occur before or after genome duplication. Schematic plots of the consequences of these scenarios on germline allelic SNP ratios and CN are shown. ‘a’ and ‘b’ represent heterozygous germline SNP. For simplification, only deletions are depicted.

**Supplementary Figure 7:** (a) Box whisker plots of the proportion of mutations acquired before or after polyploidization event in three cases with increased C>A transversions defined as Signature 8 by Alexandrov et al.<sup>2</sup>. (b) Proportion of mutations acquired before (yellow) or after (blue) polyploidization event for tumour >4N (n=6). (c) Proportion of genome lost and gained either before (yellow) or after (blue) for these tumours. Box whisker plots represent 10-90% quartiles. p values were derived using t-test. (d) In polyploid tumours, the signature of mutations that occurred before and after polyploidization was derived independently. In tetraploid tumours, 28 of 30 cases did not demonstrate a change in the mutational signature before and after polyploidization (representative case is shown on the left column – Pcsi\_0388). In two cases (DSBR – middle column; Signature 8 – right column), the defining signature only appeared after polyploidization. Pure mutational signatures from the Aging, DSBR and Signature 8 phenotype are shown according to the 96 base substitution context (bottom).

**Supplementary Figure 8:** Representative tumours where a chromothripsis event could be distinguished with as few as 7 structural variants (SVs) (left). Cases with similar number of SVs where Chrom-AL did not call a chromothripsis event are shown on the right. All Chrom-AL solutions are shown in the supplementary text. No of SVs used to make the chromothripsis call by Chrom-AL is shown top right for each case. Importantly, the algorithm needs to be combined with a visualization step to ensure the chromothripsis events are bona fide especially in cases where few SVs are involved in the event.

**Supplementary Figure 9:** (a) Chromothripsis image in a single case of lymphoblastic leukemia. (b) Percentage of the four subtypes of rearrangement profiles classified by Waddell *et al.*<sup>5</sup> observed across our cohort. (c) Number of chromothripsis events per sample subcategorized according to the rearrangement subtype in b.

**Supplementary Figure 10:** Images depicting SVs and CN alterations for chromothripsis calls from Supplementary Table 1 (ICGC validation group).

**Supplementary Figure 11: Description of chromothripsis events observed in this study.** (a) A focal chromothripsis event spanning a 2Mb window that removed a copy of *CDKN2A*. (b) A representative case of a multi-chromosome chromothripsis event spanning three distinct chromosomes. (c) A representative cases where a chromothripsis event was coopted with cycles of BFB cycles. Foldback (FB) inversions that denote a BFB cycle are shown as black curved arrows on top of the plot.

**Supplementary Figure 12: Consensus copy number plots from cases with and without chromothripsis.** To facilitate comparison of CN profiles amongst all cases, polyploidy tumours were normalized according to tumour ploidy (shown as Normalized CN on the y-axis). Interquartile ranges for chromothripsis cases are indicated in pale red, and for non-chromothripsis cases in pale blue. The location of common tumour suppressor genes in cancer, obtained from Vogelstein et al.<sup>28</sup>, are shown to uncover regions whether CN changes from chromothripsis affected driver genes.

**Supplementary Figure 13: Characterization of copy number and mutation events in TP53 and SMAD4 genes.** (a,b) CN number of the *TP53* gene with a coinciding mutation. In a, cases where the mutation is present in all cells (fully clonal) is shown. In b, cases where the

mutation is subclonal to the allelic loss are shown. Cases where the CN of the gene is above 1 are polyploidy tumours. (c,d) Similar to a and b for status of the *SMAD4* gene. To determine the fraction of tumour cells carrying the mutation, we used the following formula from Nik-Zainal et al.<sup>29</sup>:  $f = \min(1, \frac{r}{R} \frac{pCN_T + (1-p)CN_N}{p})$ . r - read depth of mutant allele, R - total read depth, p - cellularity, CN<sub>T</sub> - copy number of variant in tumour, CN<sub>N</sub> - copy number in normal.

**Supplementary Figure 14: Characterization of *TP53* and *SMAD4* mutational status in a case of primary tumour and matched metastases.** (a) Schematic depiction of the case. The primary tumour (P) was in the head of the pancreas was removed by whipple resection. The two metastases appeared at the site of anastomoses (M1) and in pancreas tail (M2) one year after the surgery. All tumours had a minimum cellularity of at least 80% prior to sequencing. All three samples underwent WGS to ~45X depth with a paired normal (blood) at ~40X. (b) CN status of *TP53* and *SMAD4* in the primary tumour and metastases. CN for all cases for both genes resides directly at integer copy indicating that it is present in all cells. (c) IGV depiction of the *TP53* and *SMAD4* variant observed in these tumours. (d) Proportion of cells carrying the *TP53* (top) and *SMAD4* (bottom) variant in primary and metastases. (e) The chromothripsis event on chr9 that removed a one copy of *CDKN2A* in present in the primary tumour and metastases. \* indicates region reads that mapped to repeat regions.

**Supplementary Figure 15: Phylogenetic tree of metastatic progression in Pcsi\_0410 (related to Figure 3).** (a) To derive the genetic relationship between metastases in Pcsi\_0410, a neighbour-joining tree was inferred using the Euclidean distance defined by copy number profiles (encompassing structural variants) and weighted by the length of the segments. Copy number profiles of each sample are below the clustering dendrogram (log2 scale). (b) Genetic relationship of metastases based on somatic SNV data using neighbour joining method based on whether the SNV was present. There are a total 6,750 somatic SNVs shown in the heatmap and 4,183 that were common in all of the metastases (not present on the map).

**Supplementary Figure 16: Assessment of ploidy by CELLULOID and TITAN.** Comparison of (a) ploidy and (b) cellularity estimates between CELLULOID and TITAN. TITAN's solutions were inspected according to contour plots (shown in Supplementary Figure 17) and curated. The size of the points indicates the rank of TITAN's validity index measure based on 6 possible solutions.

**Supplementary Figure 17: Comparison of TITAN solutions and CELLULOID solutions for FISH validated samples.** Cases showing ploidy solutions for TITAN based recommended validity index (indicated to left corner, TITAN - default) versus an alternate solution (TITAN curated) that verified with FISH data (bottom left). The CELLULOID solution corresponds to revised TITAN ploidy solution.

**Supplementary Figure 18: Related to Extended Figure 9:** (a) High concordance between LOH events in bulk (\*) tumour versus single tumour cells. (b) Coverage statistics on single cells used in the analysis above.

**Supplementary Table 1:** Summary of pathological and clinical variable of the cases used in this study.

**Supplementary Table 2:** Summary of chromothripsis events in the validation cohort of PC genomes made available through the International Cancer Genome Consortium. Images of all events are presented in Supplementary Fig. 10.

## **Supplementary Figures and Tables**

Ashpc\_0027

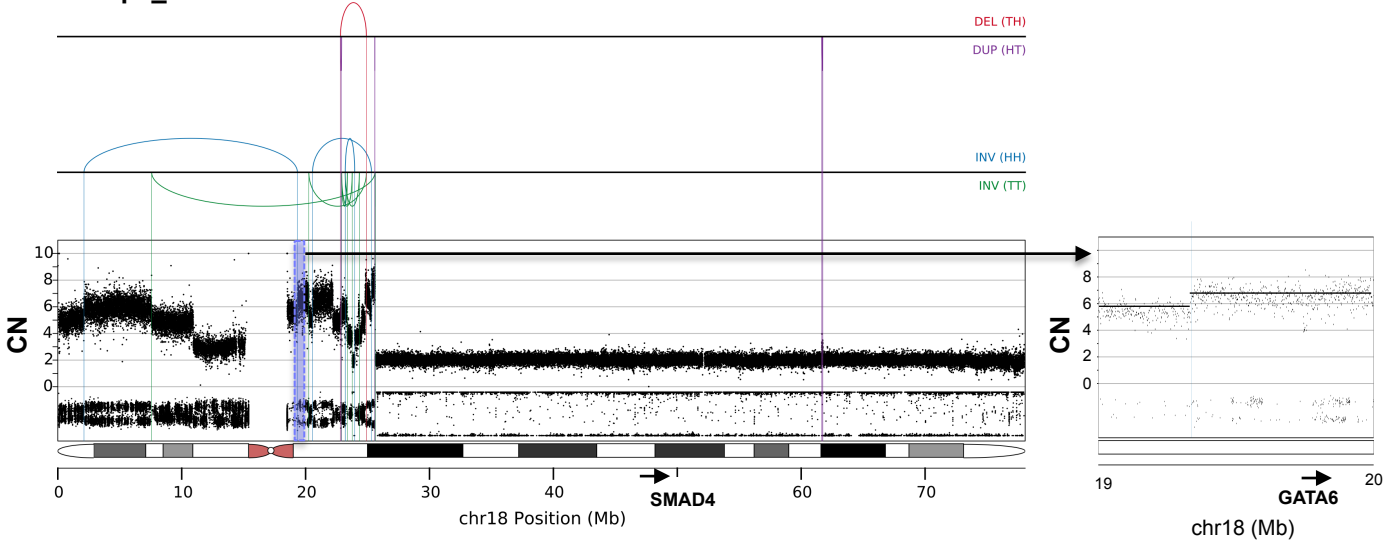

# Supplementary Figure 2

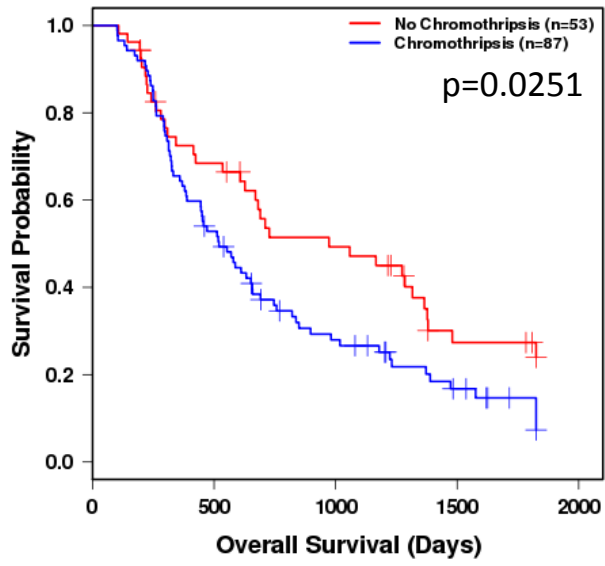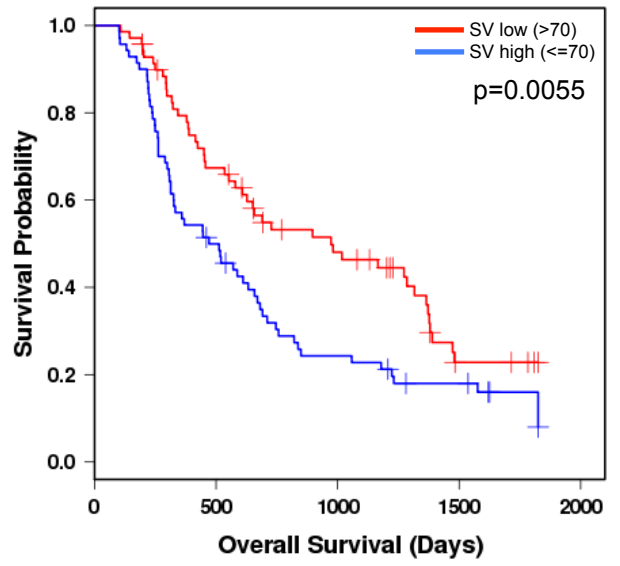



# Supplementary Figure 3

**a**

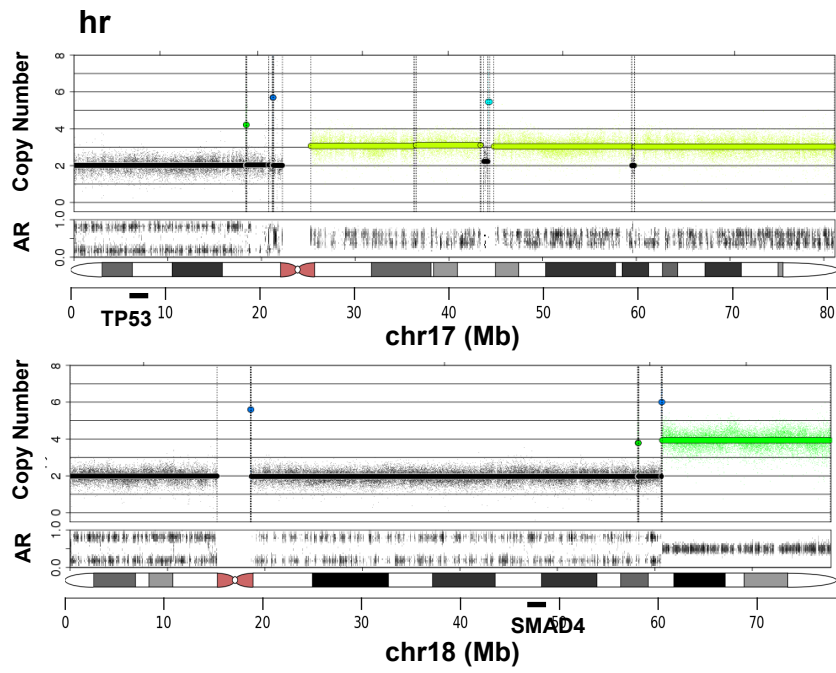

**b**

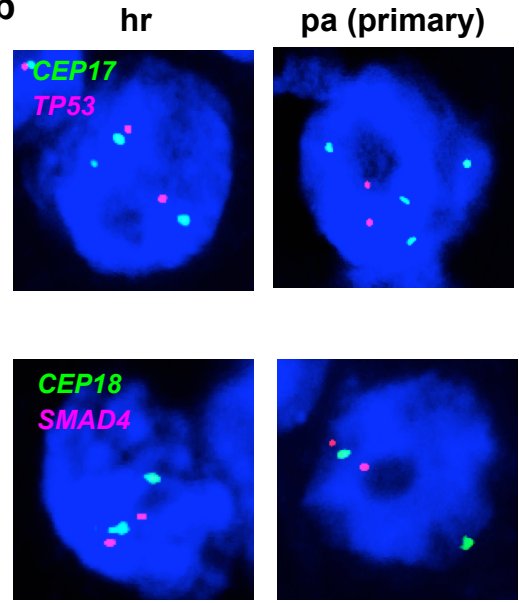

**c**

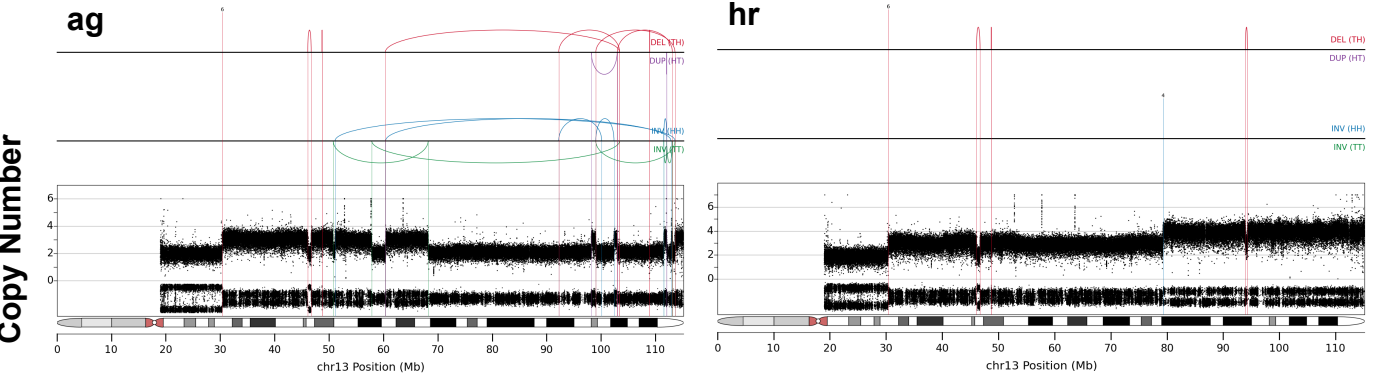

**a**

Ashpc\_0003

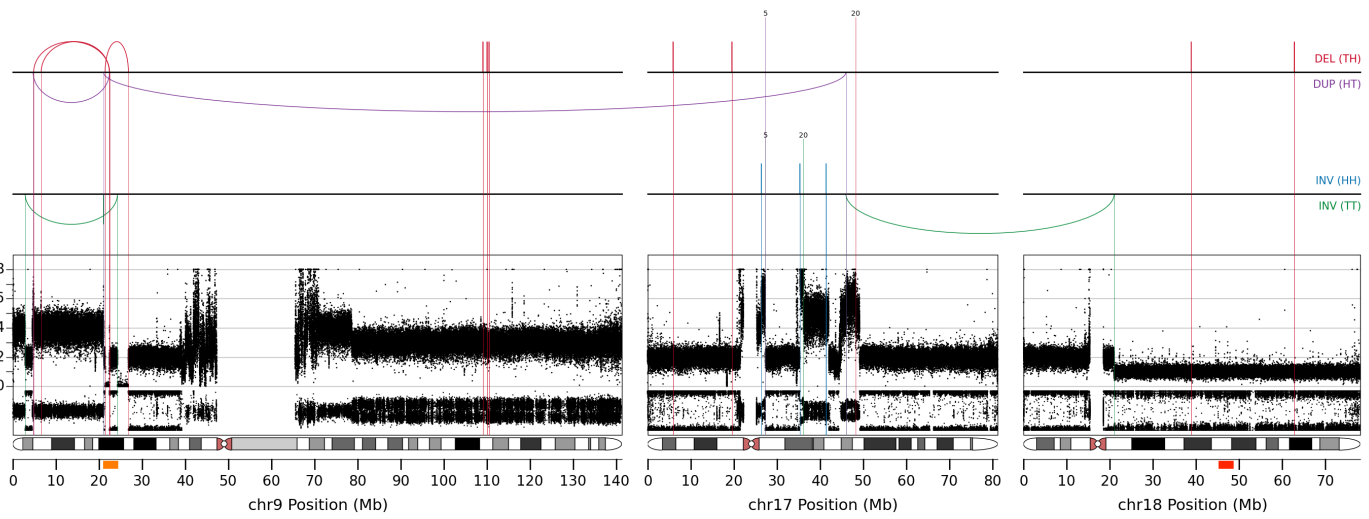

**b**

Ashpc\_0017

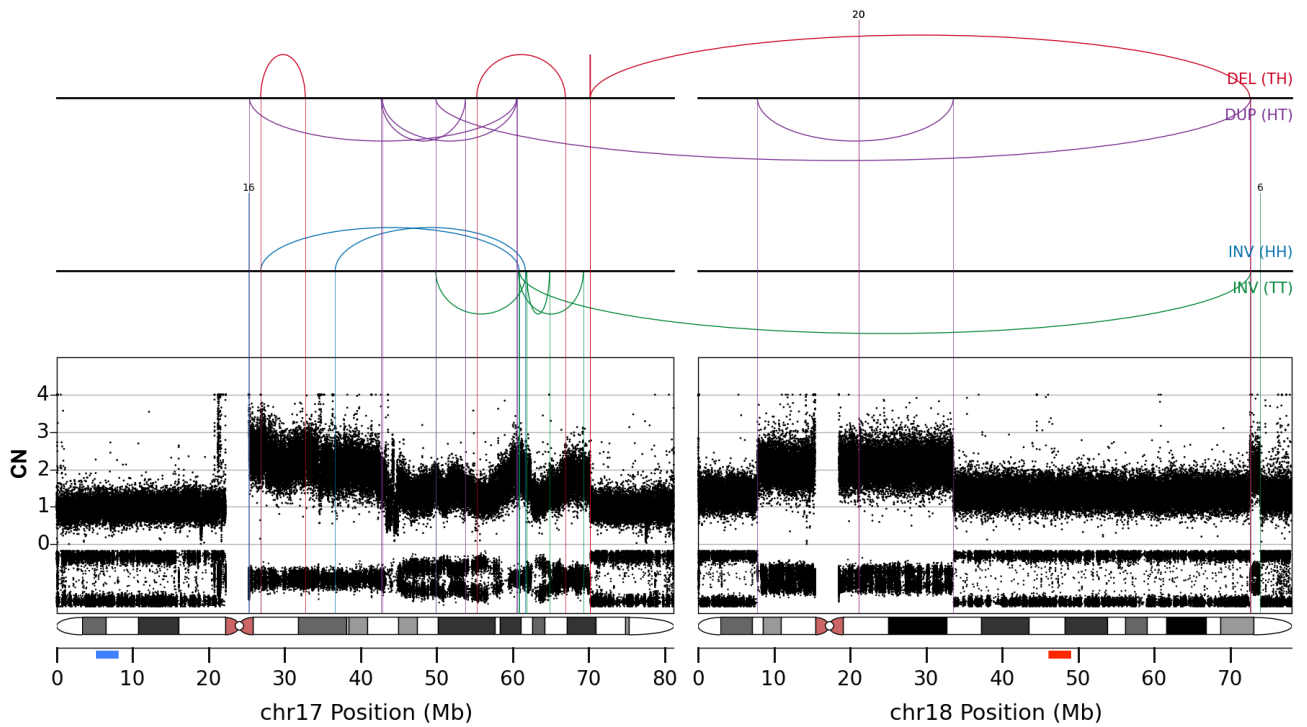

- █ CDKN2A
- █ TP53
- █ SMAD4
- █ KRAS

**c**

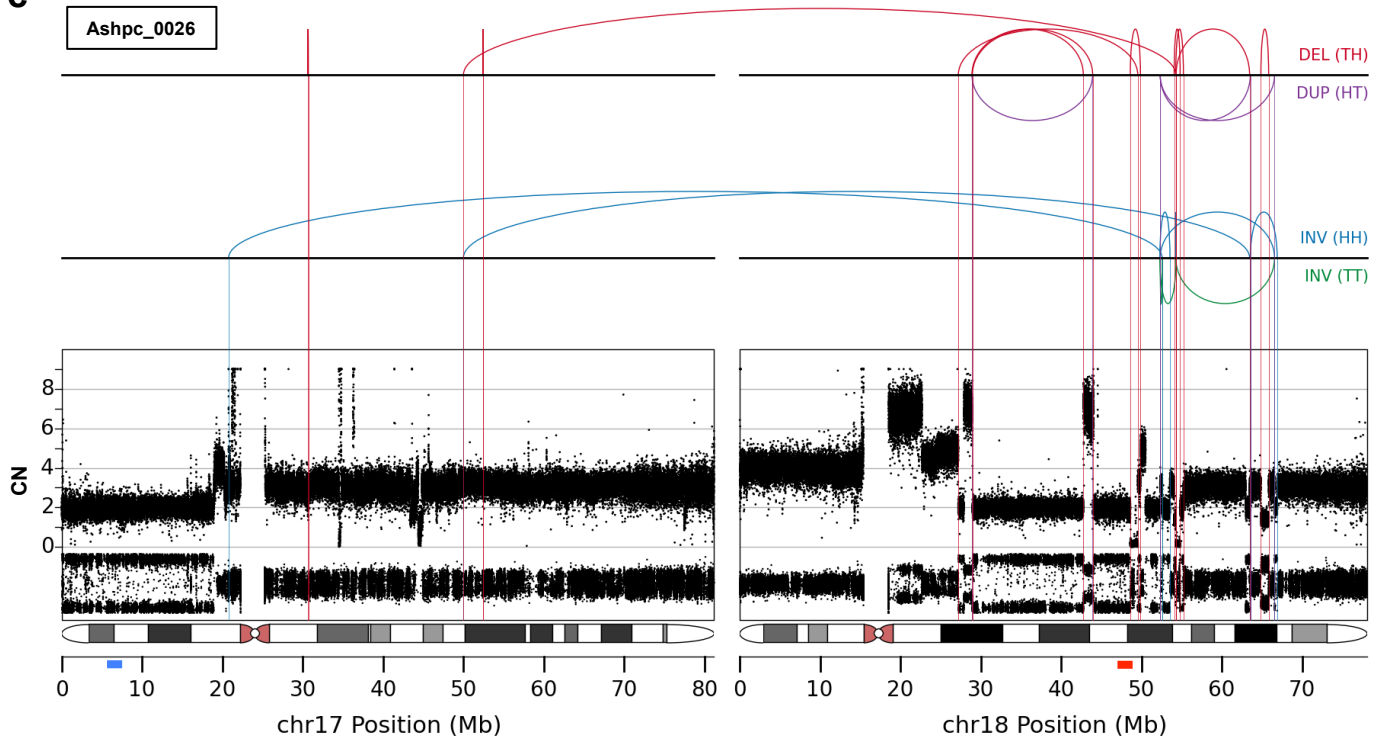

**d**

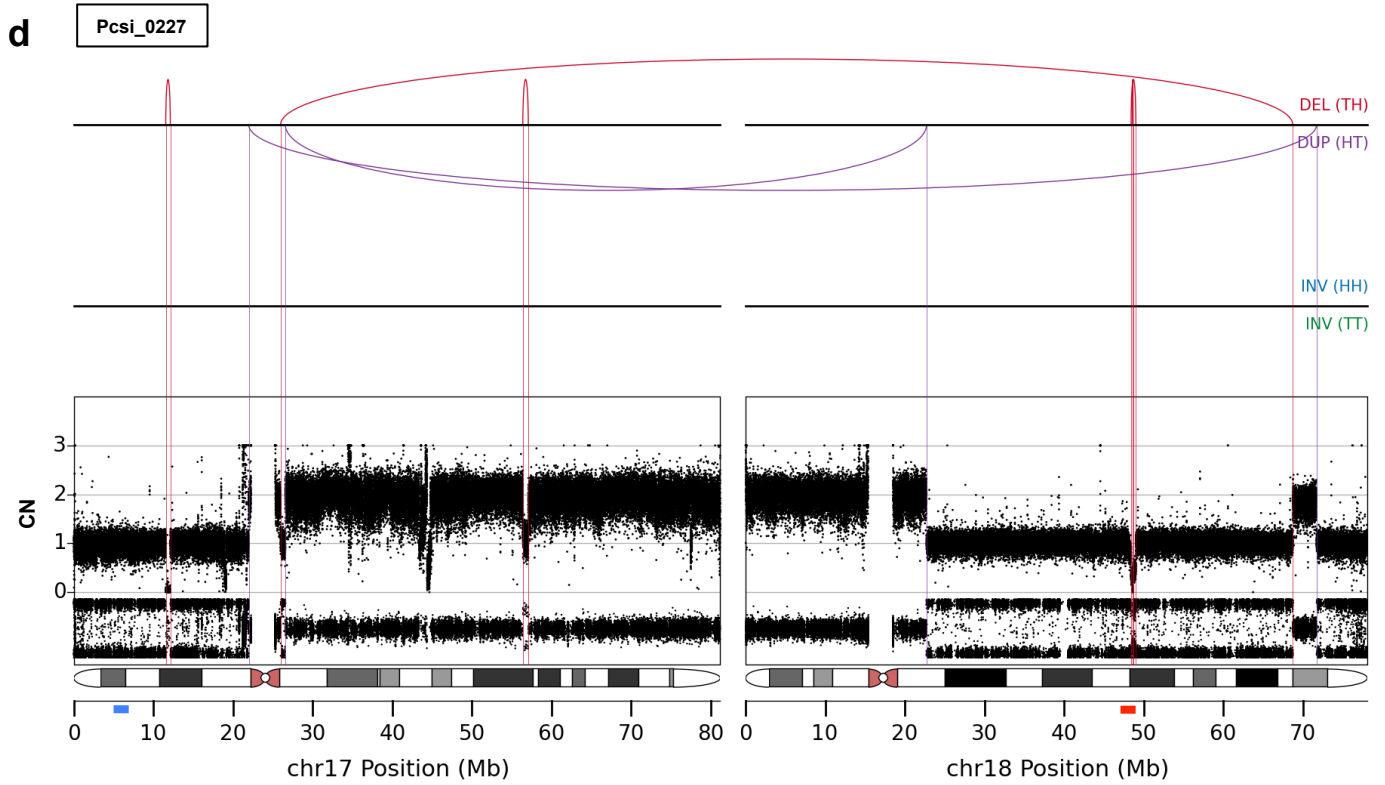

e

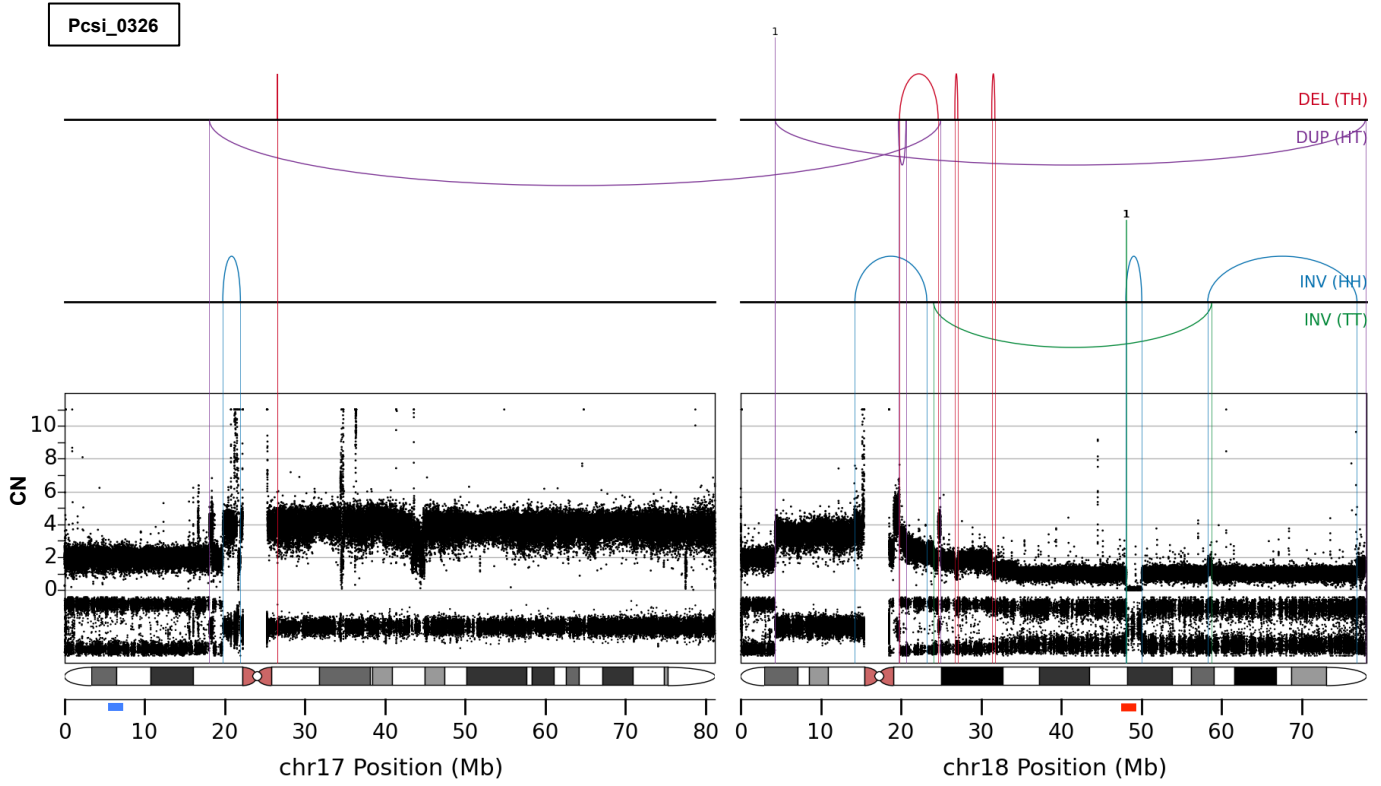

f

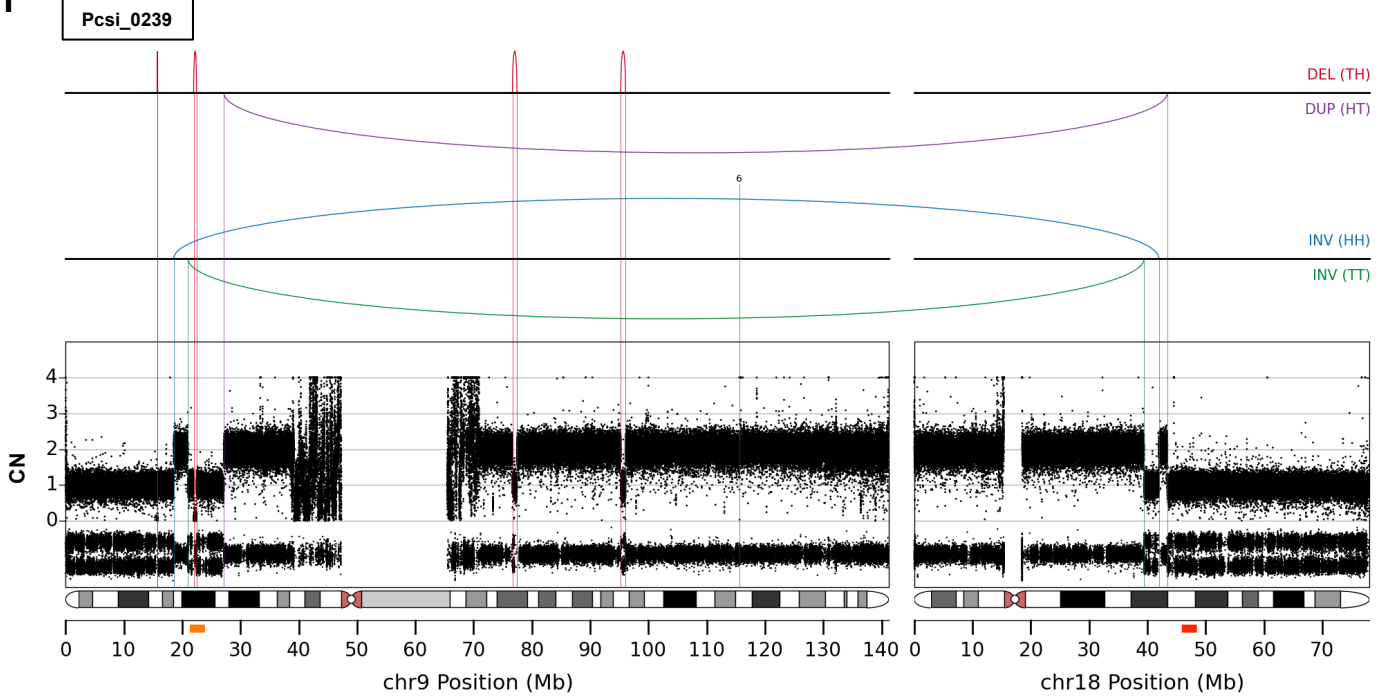

g

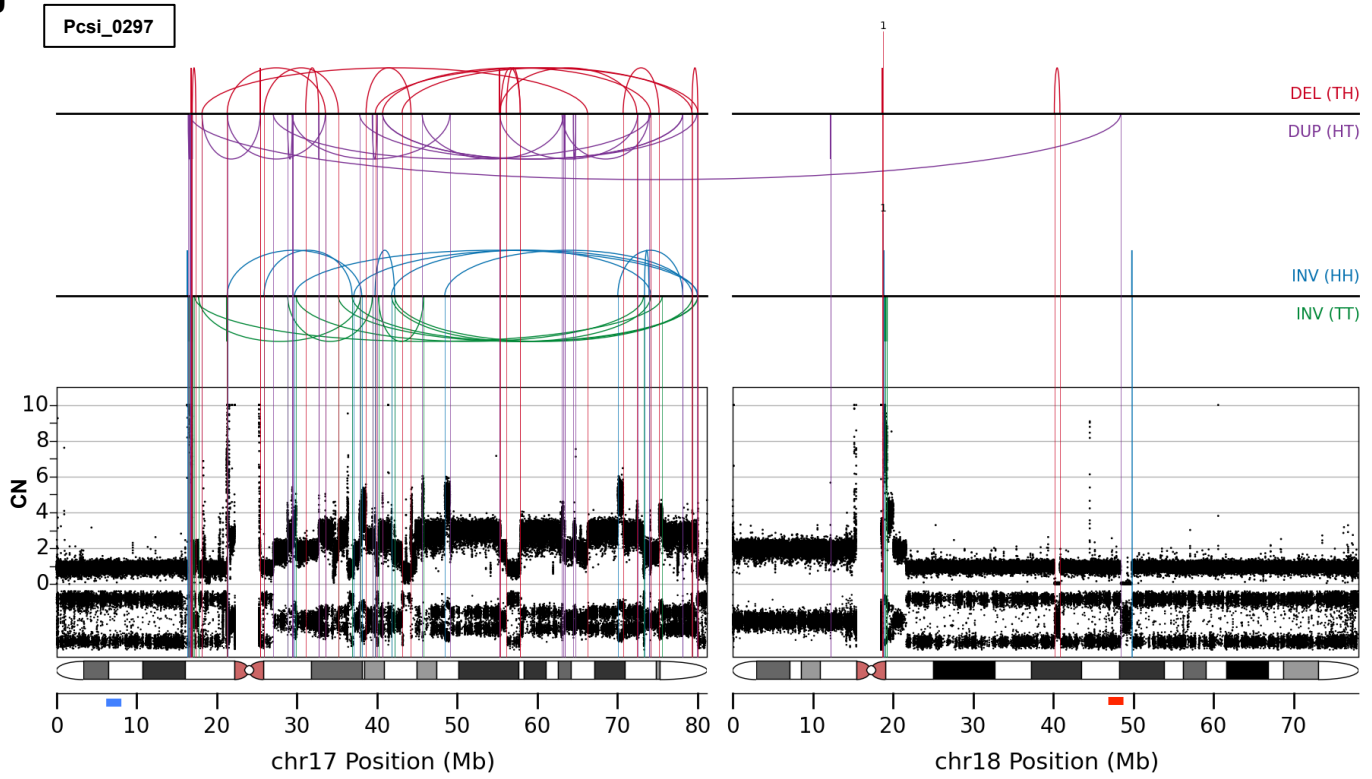

h

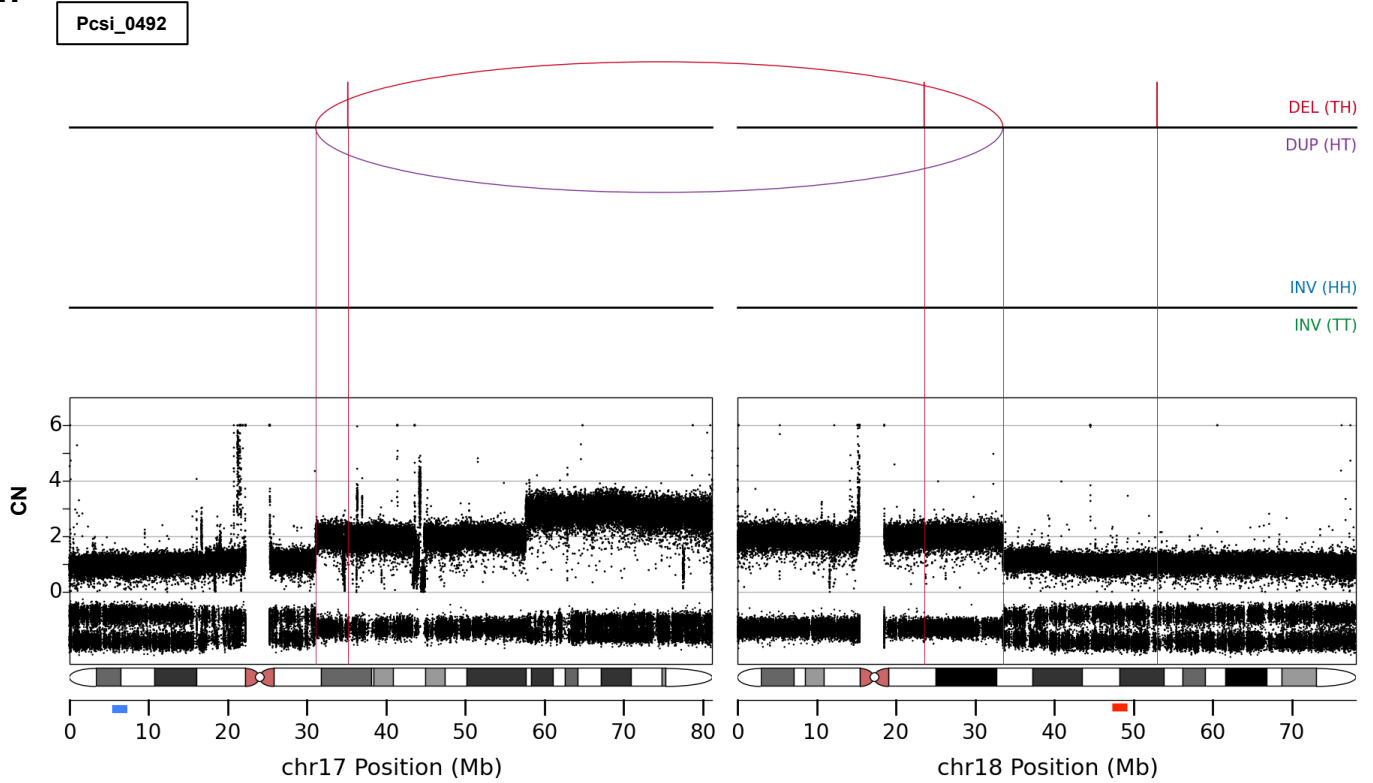

i

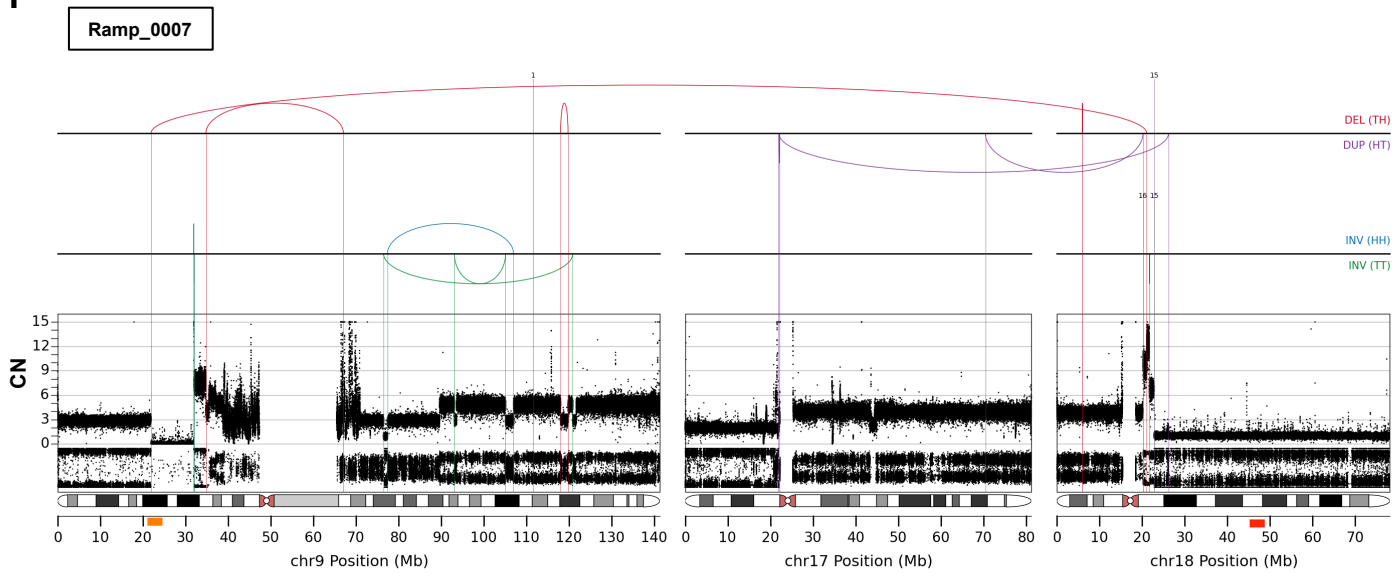

j

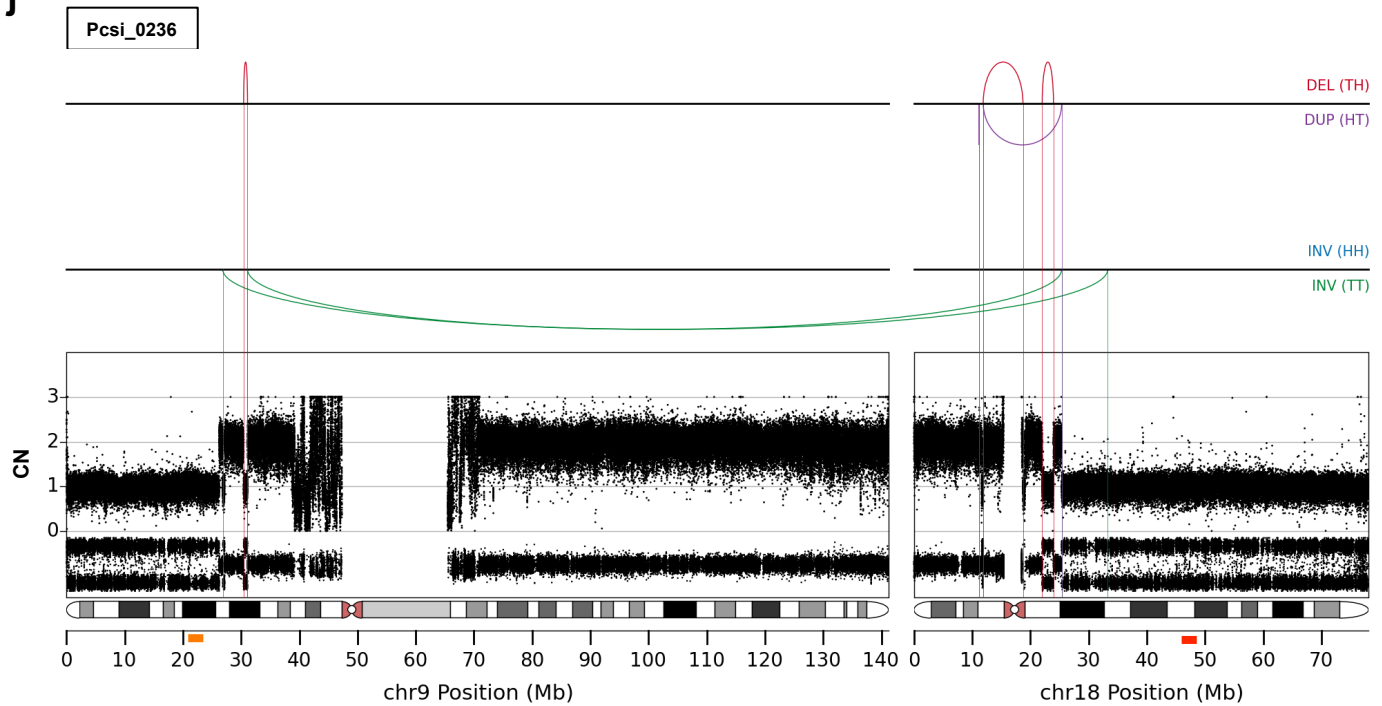

k

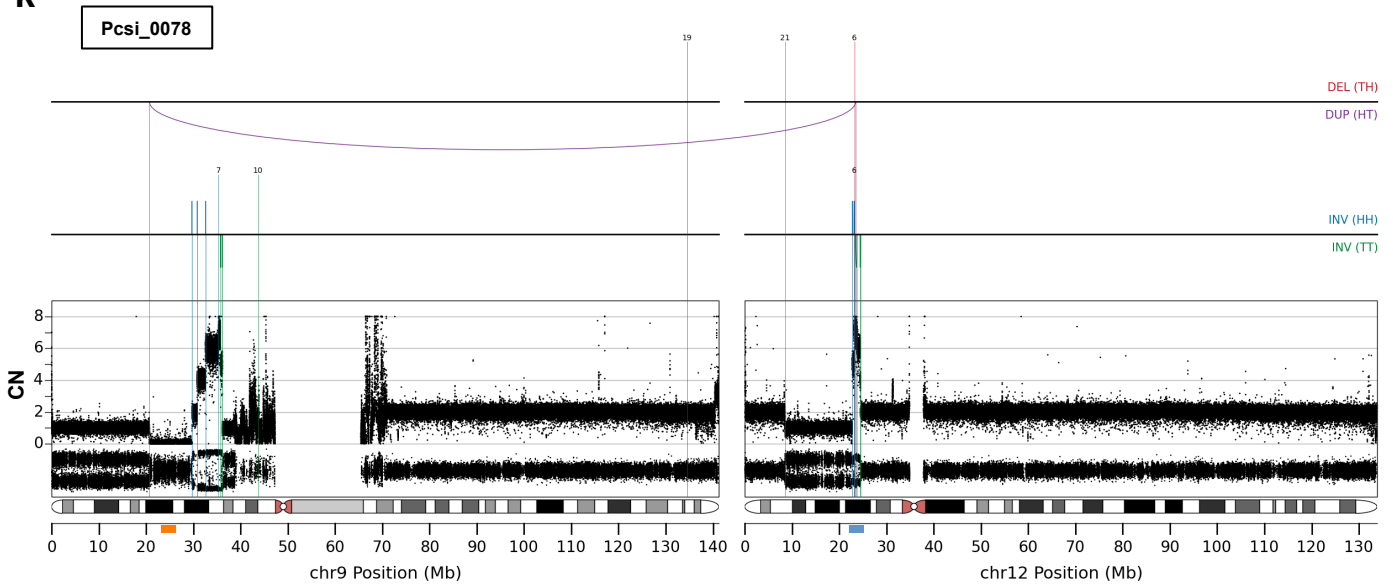

l

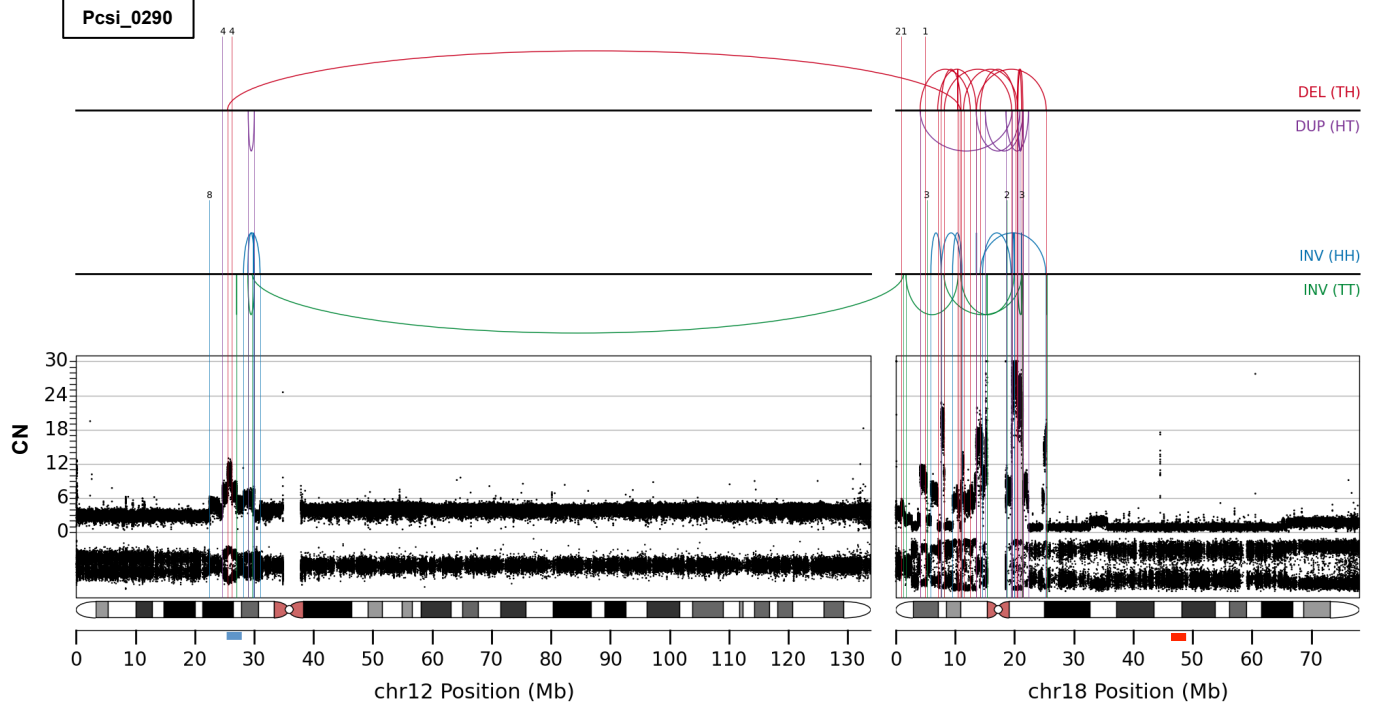



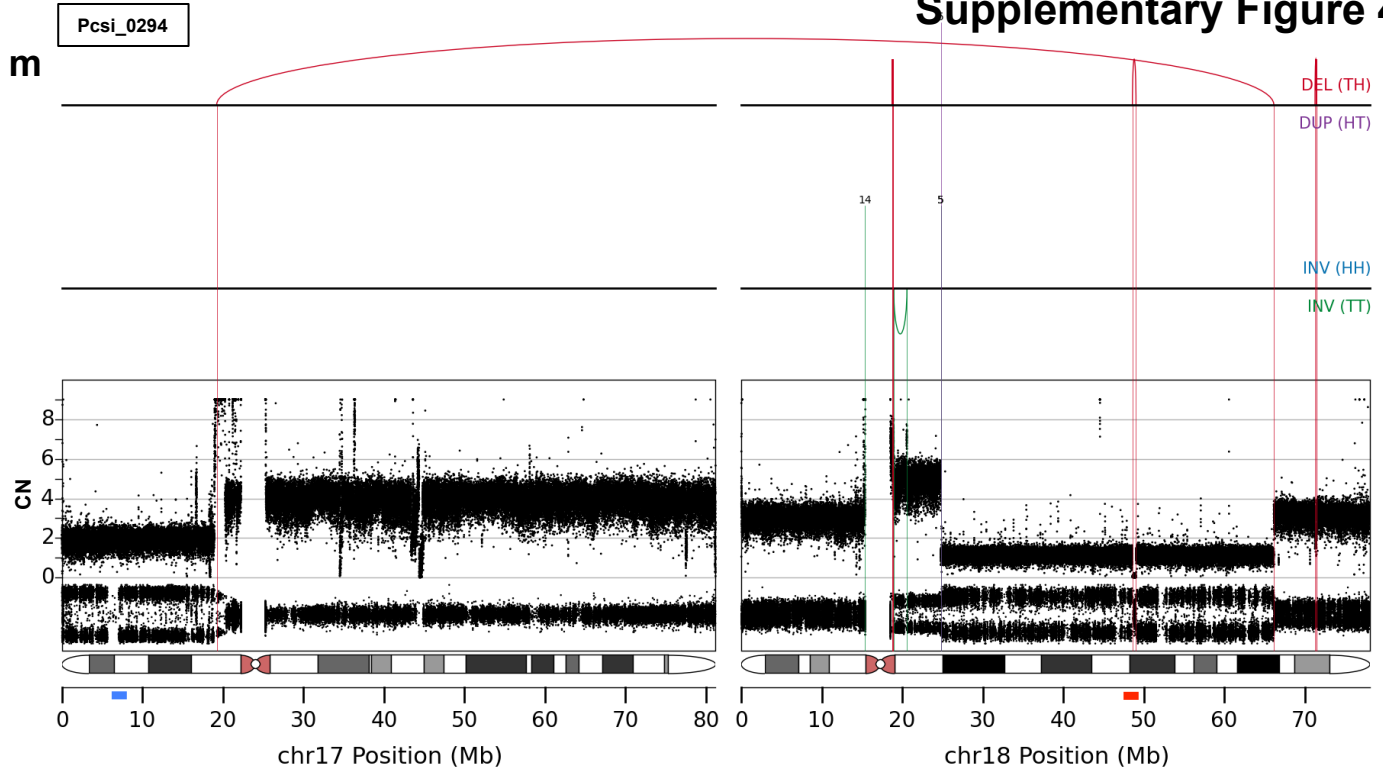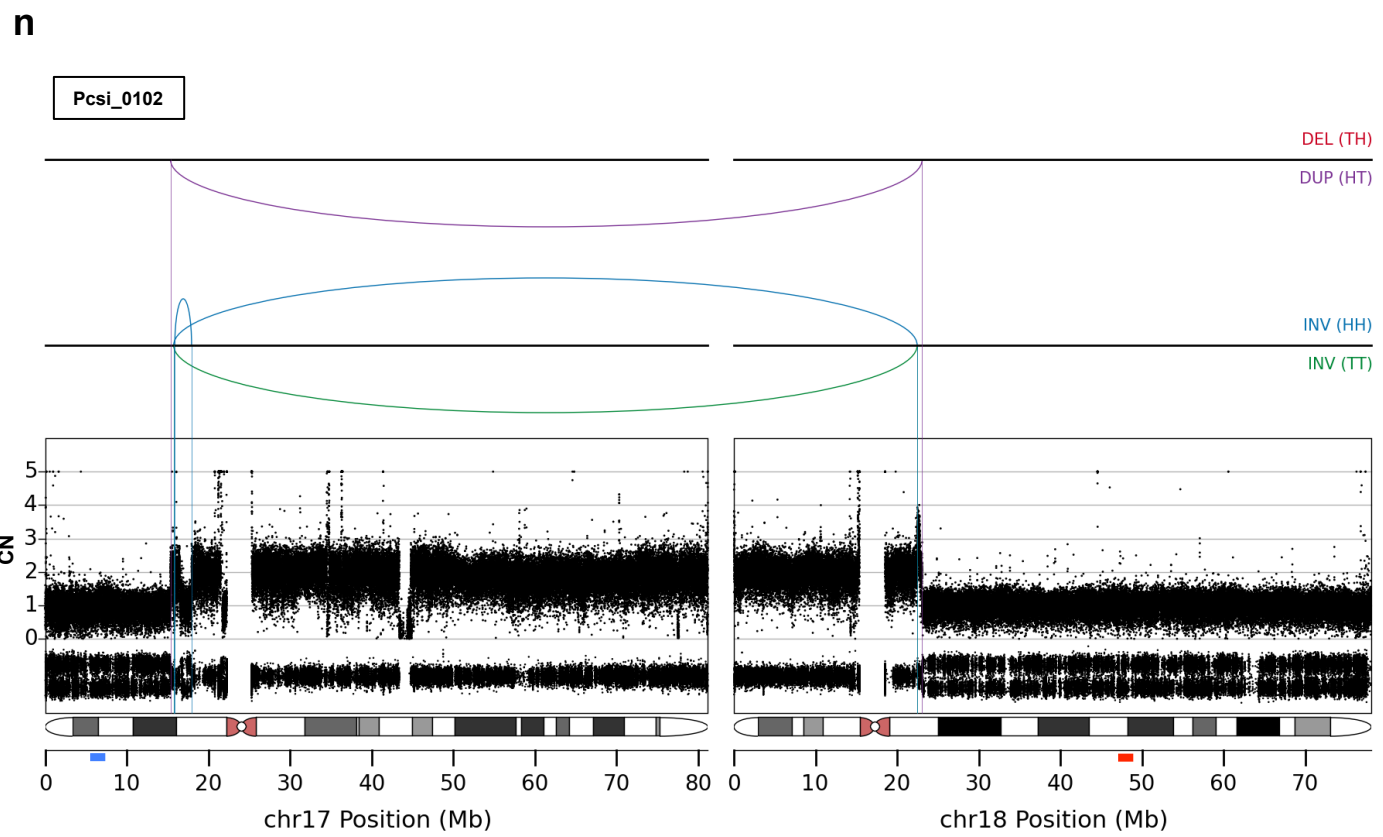



O

Pcsi\_0312

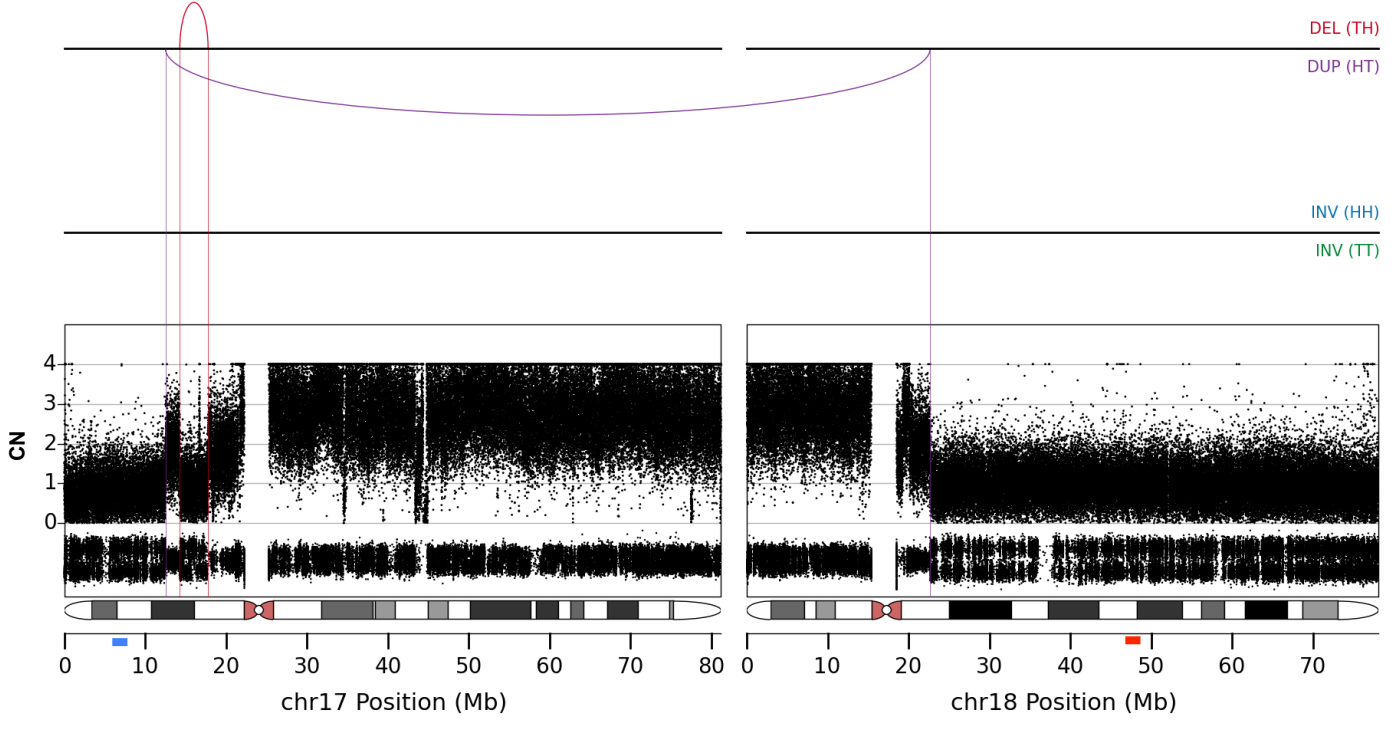

a

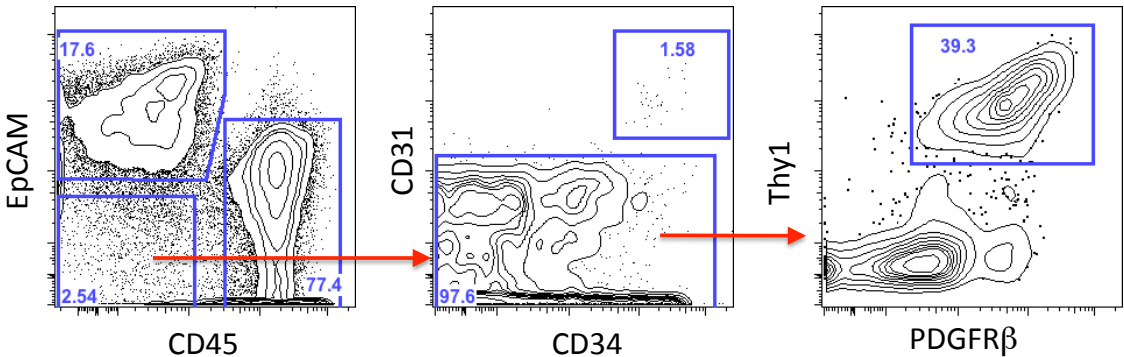

b

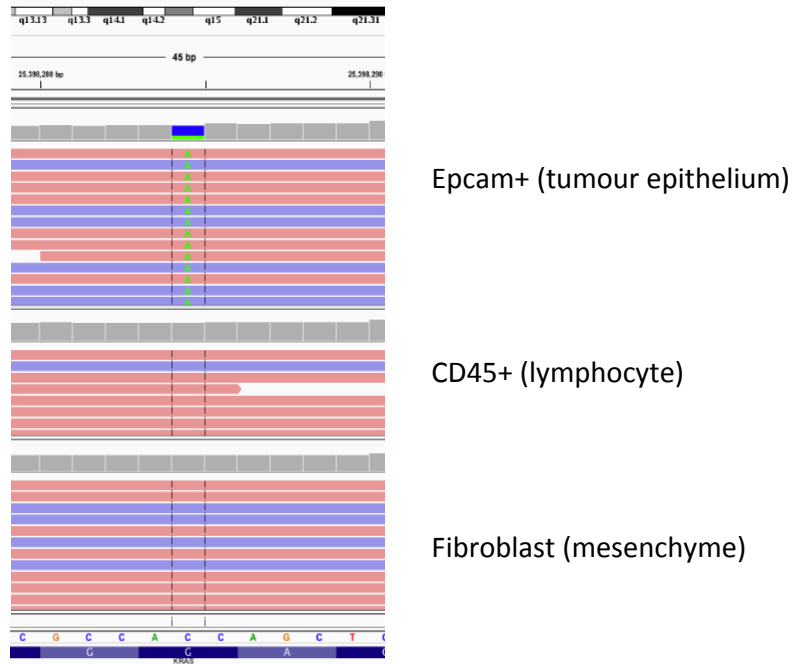

**a**

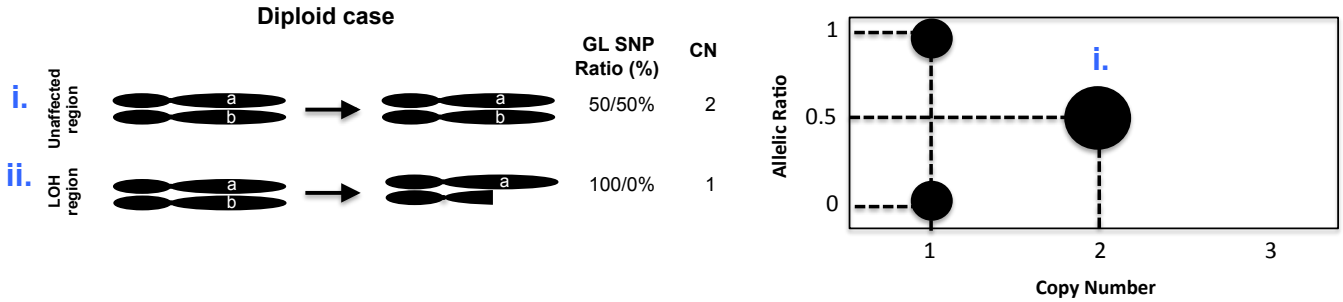

**b**

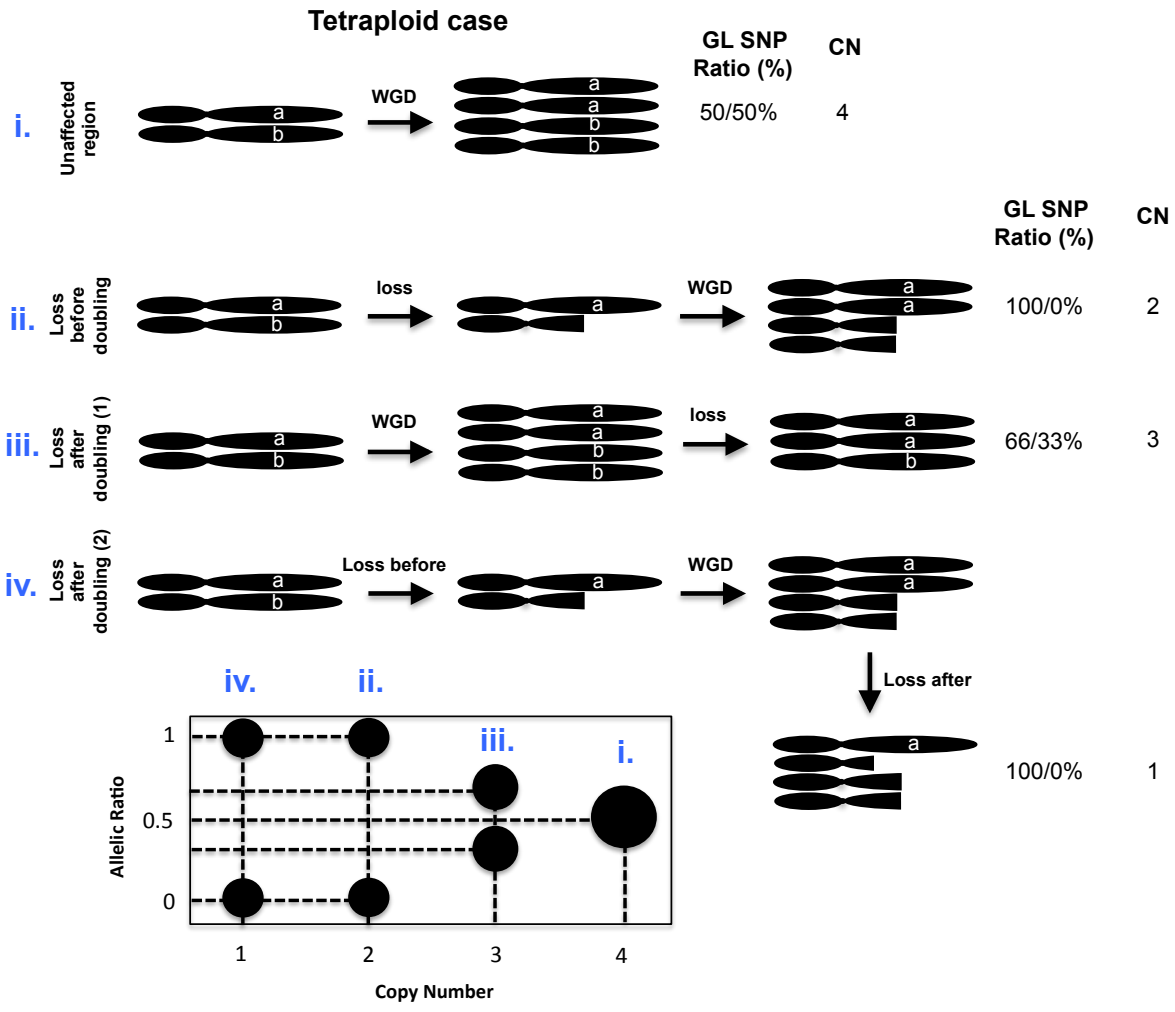

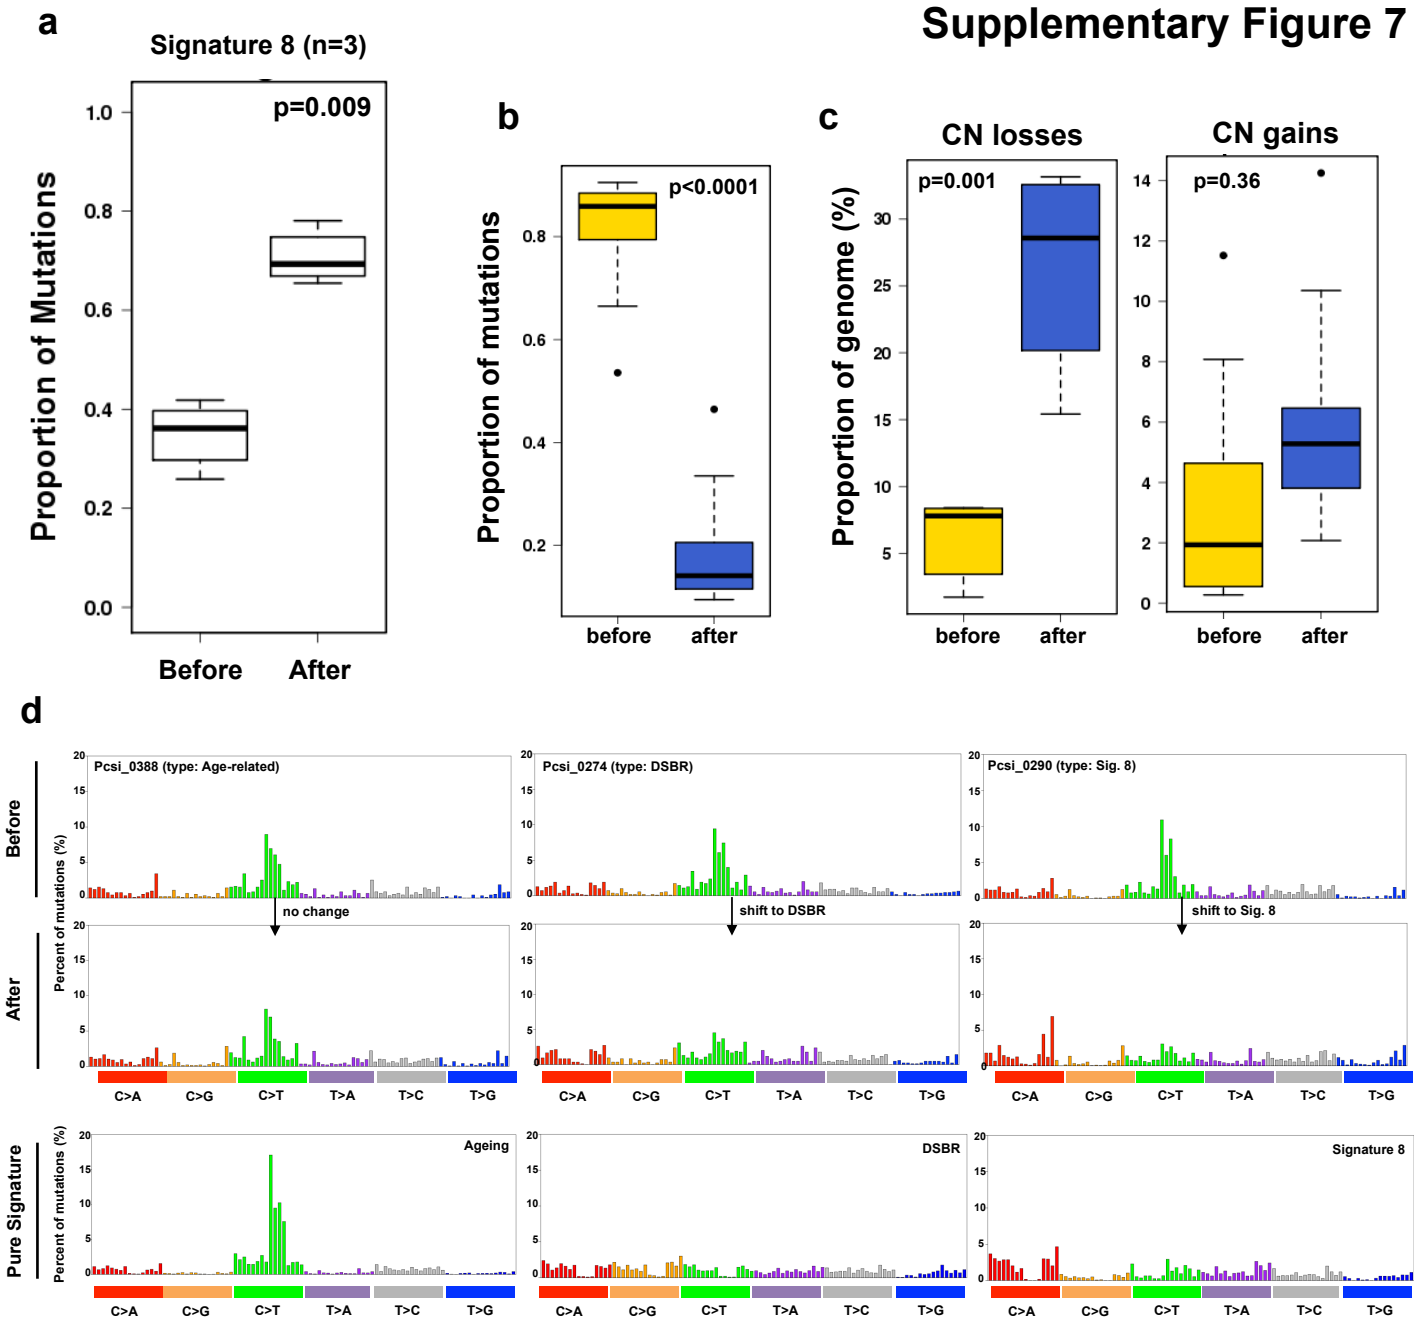

## chromothripsis

no. SVs

## no chromothripsis

no. SVs

Ashpc\_0003

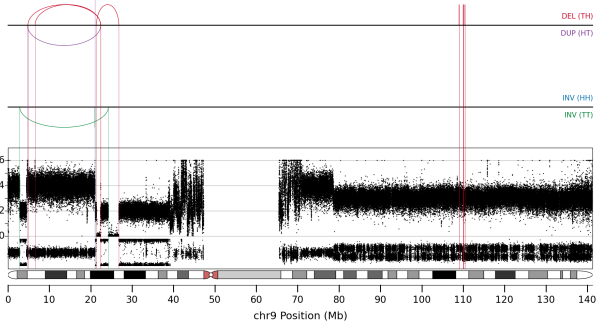

7

Pcsi\_0048

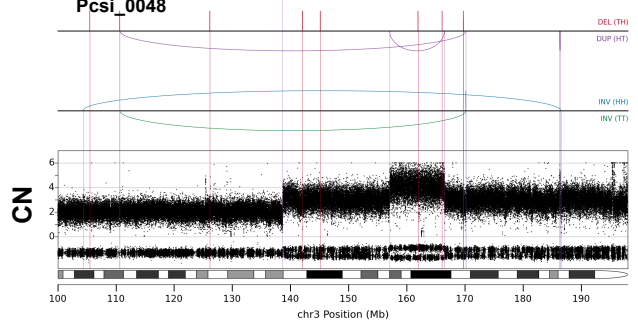

11

Ashpc\_0007

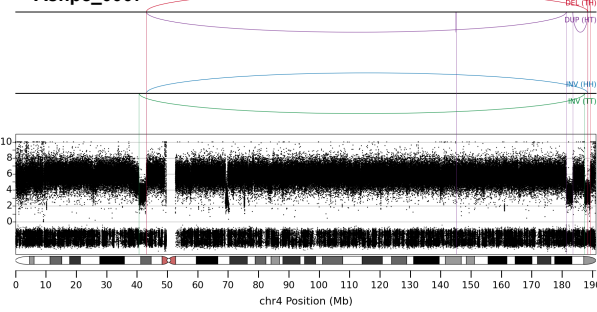

7

Pcsi\_0162

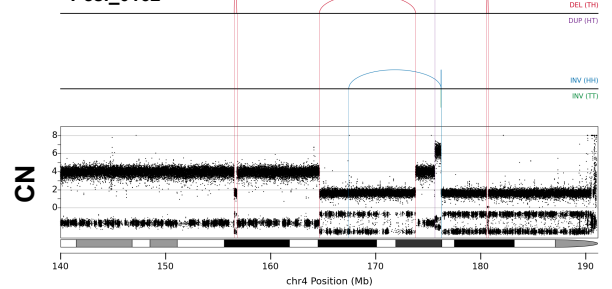

7

Pcsi\_0287

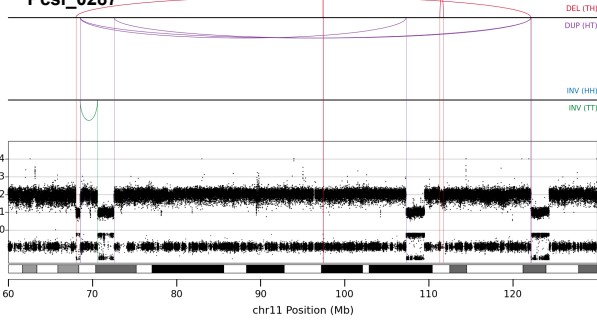

7

Pcsi\_0084

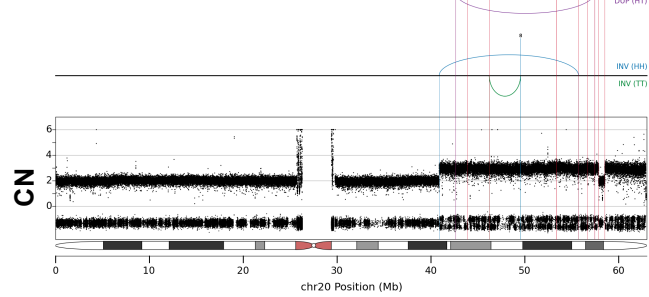

10

Pcsi\_0345

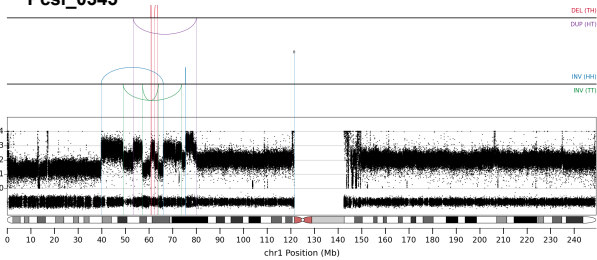

7

Ashpc\_0015

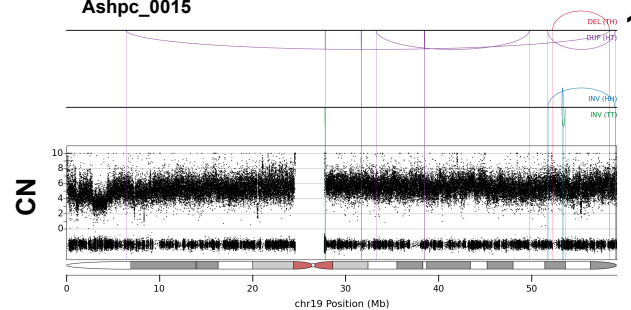

13

**a**

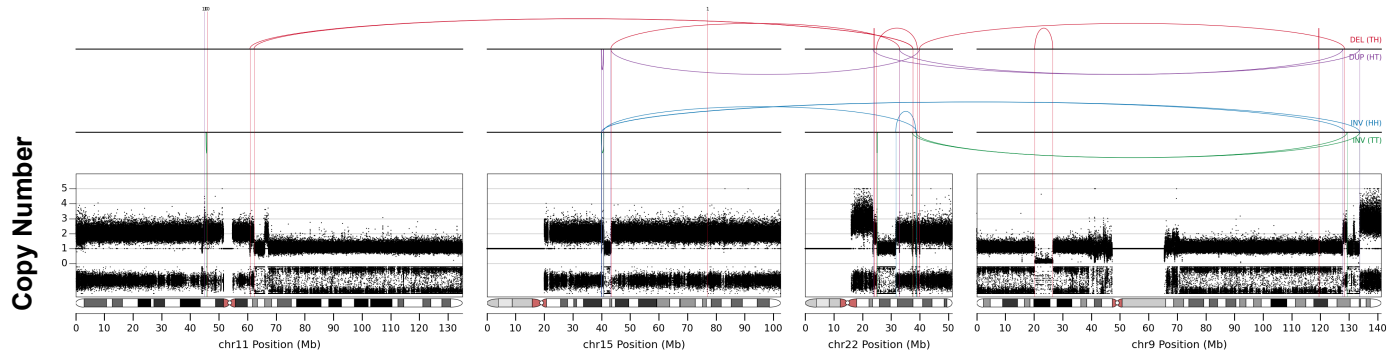

**b**

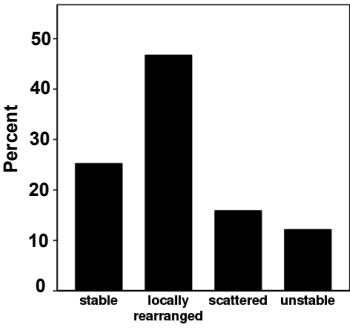

**c**

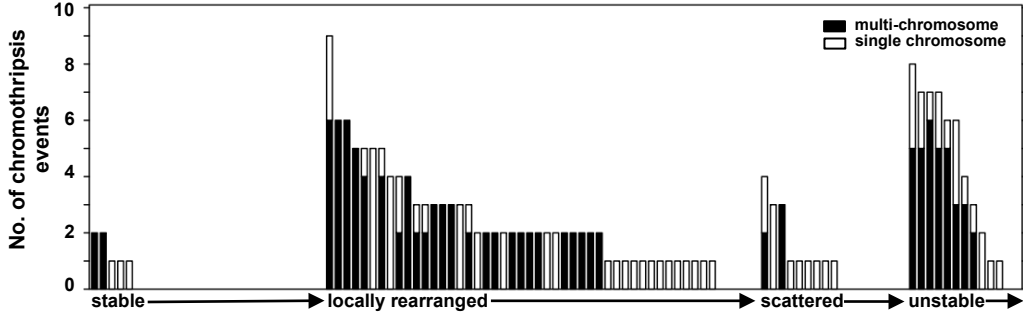





# Supplementary Figure 10

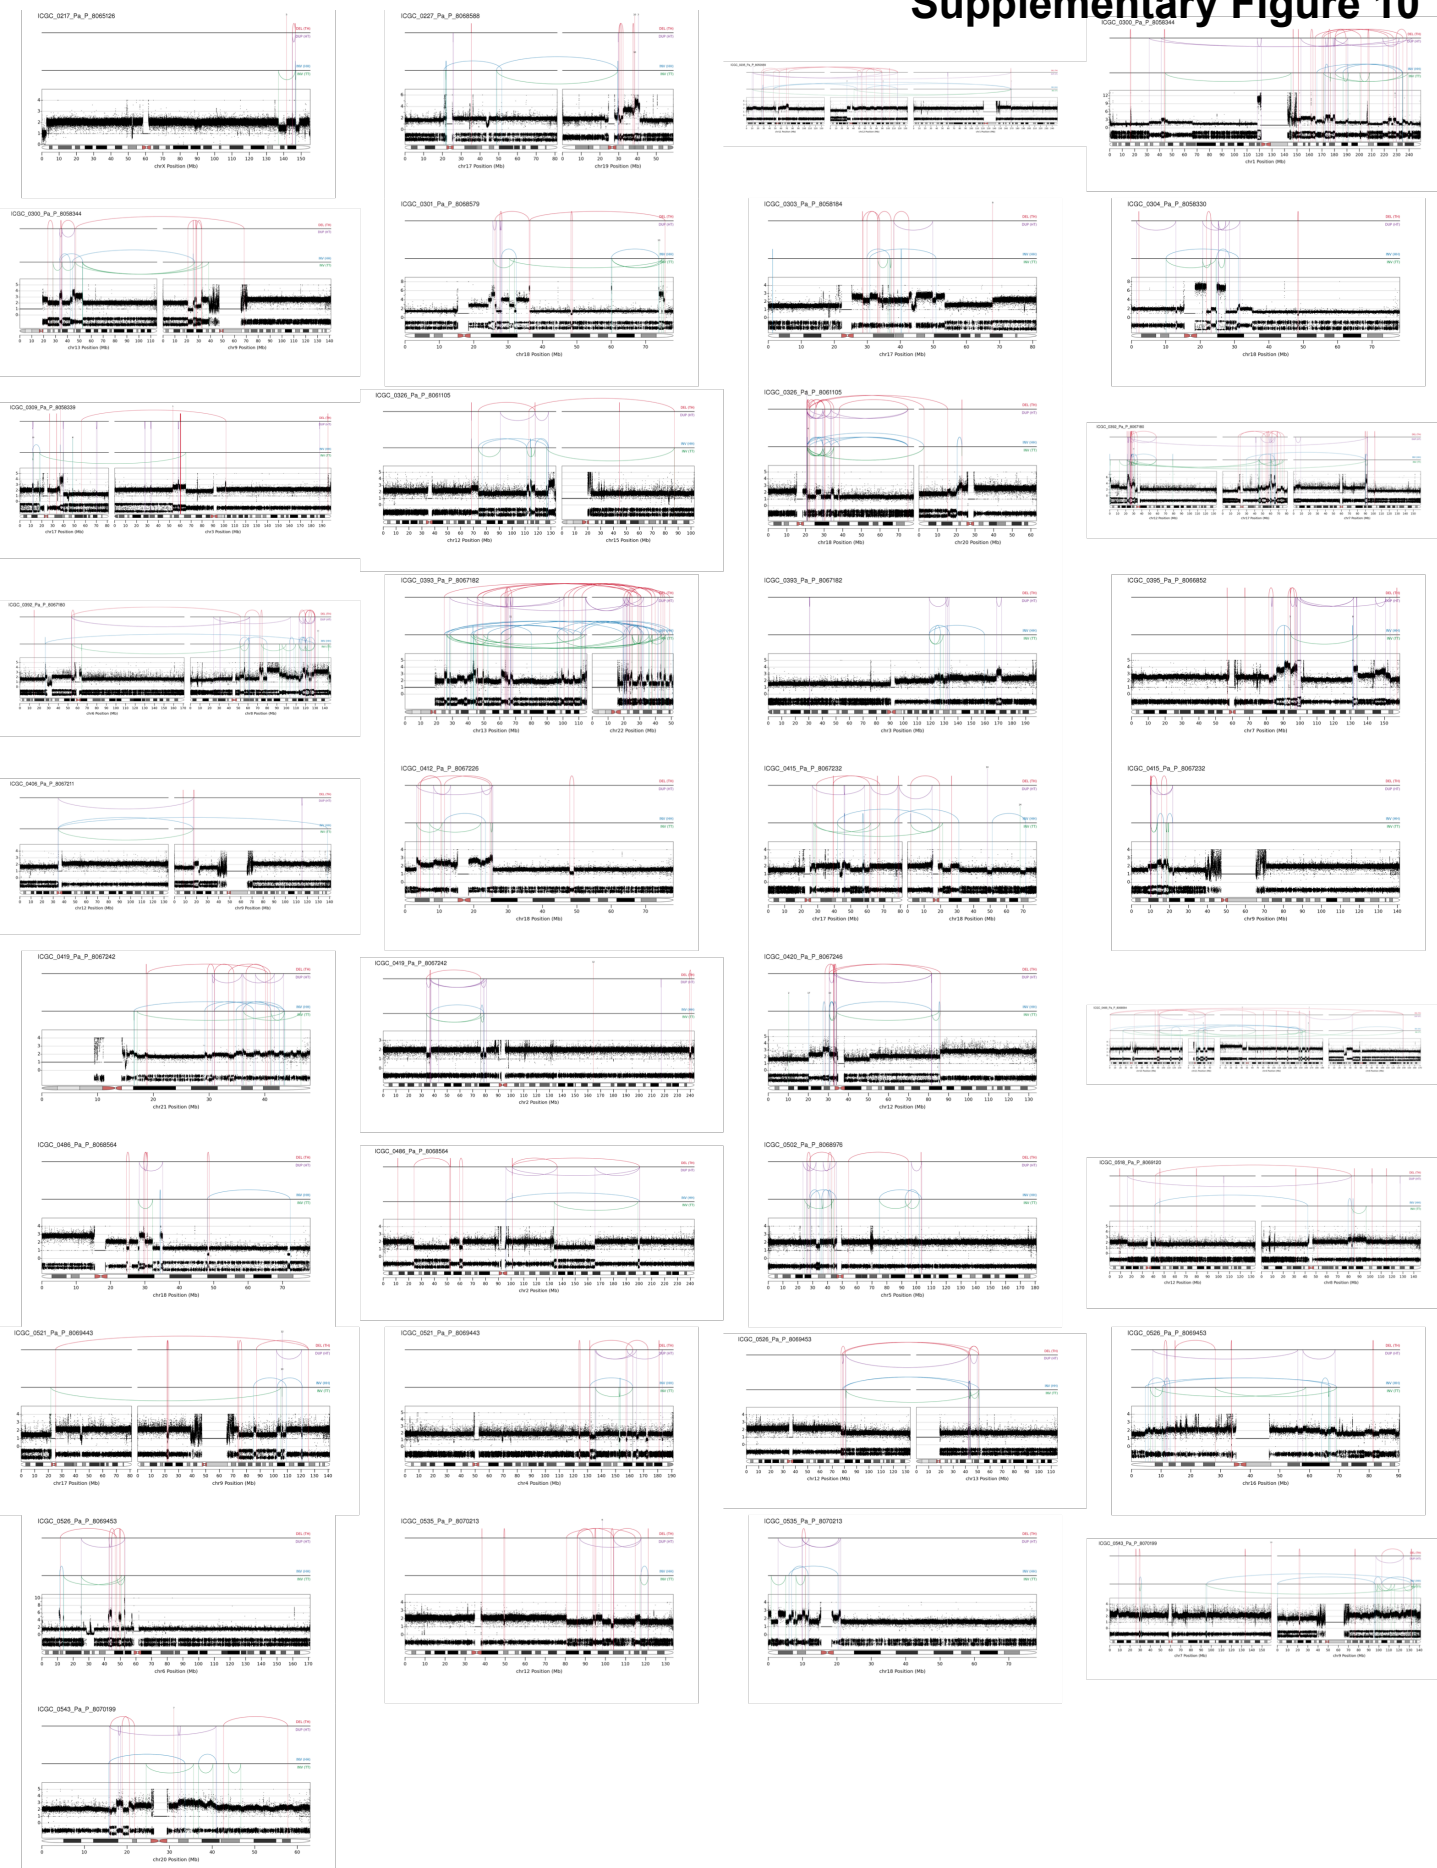



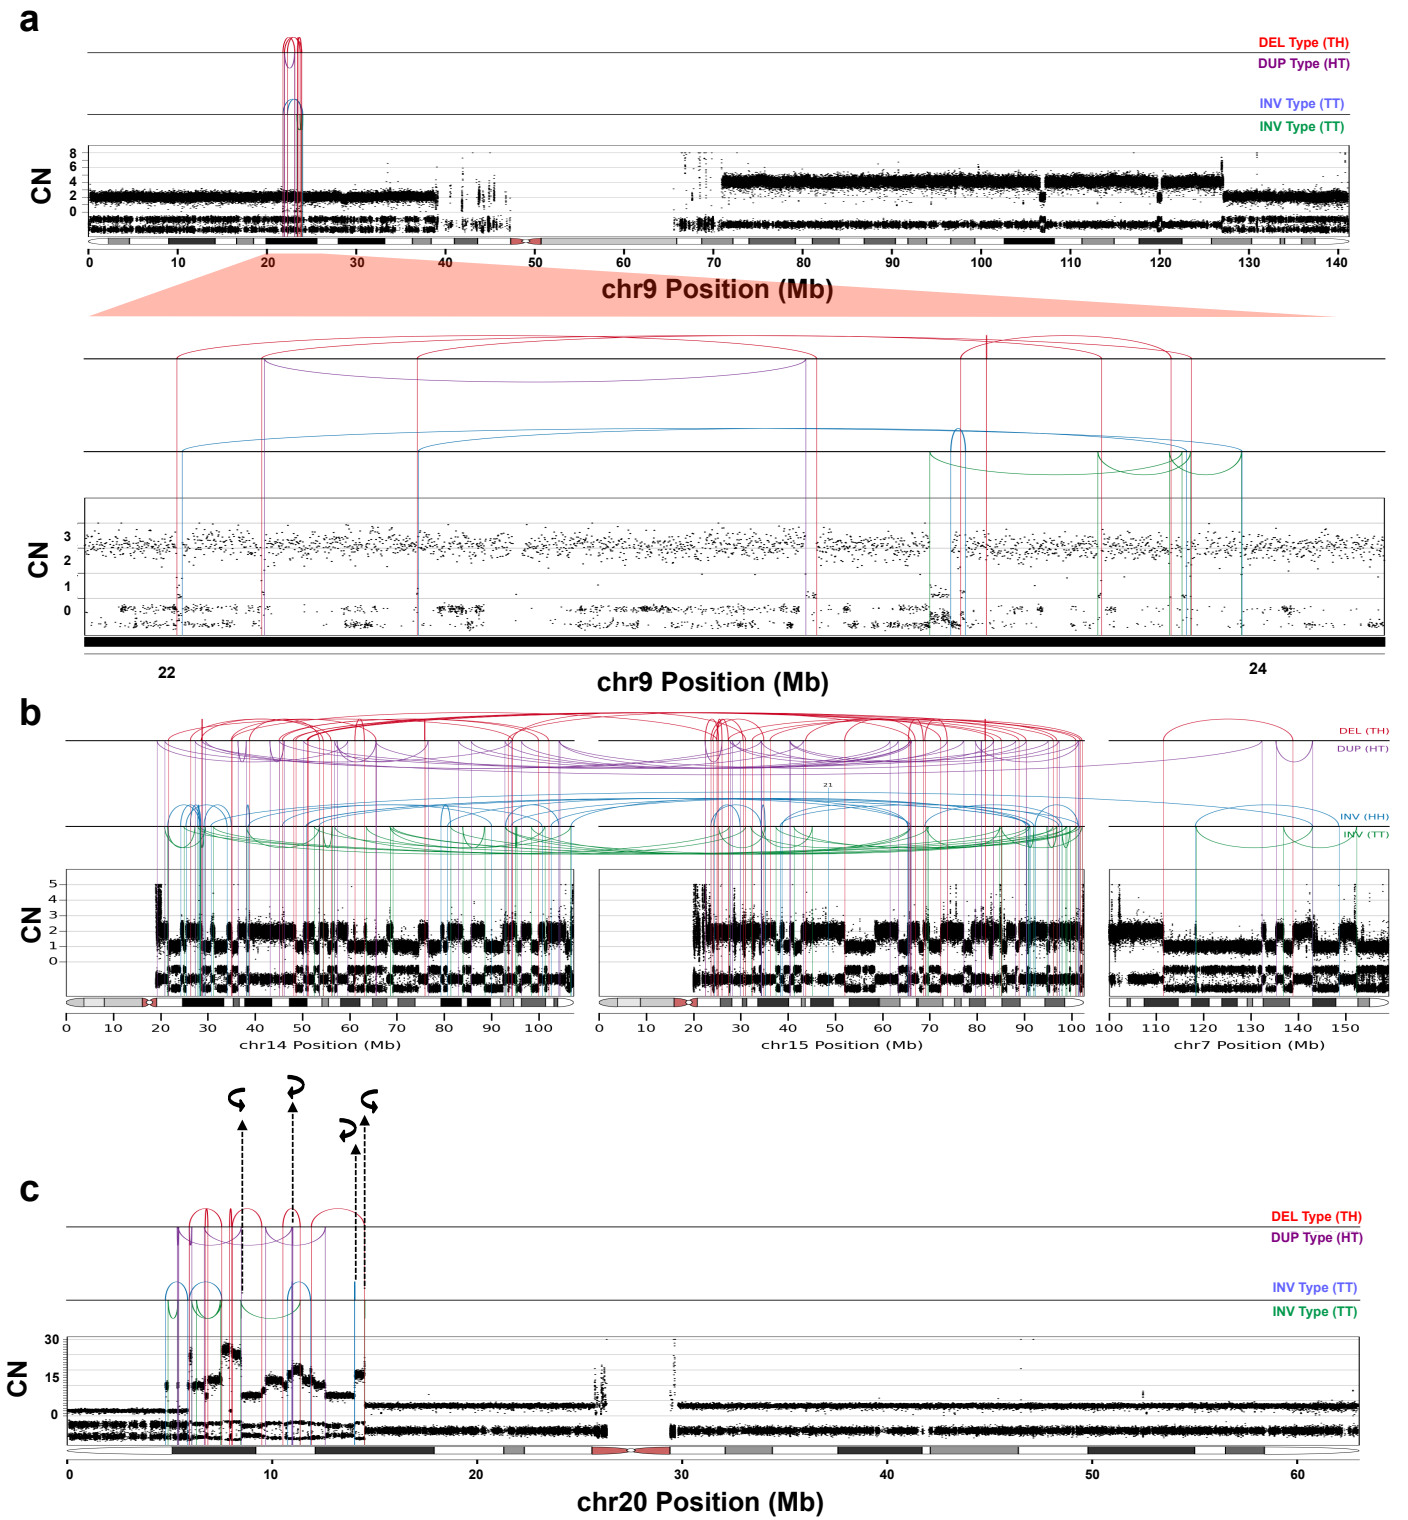

chr1

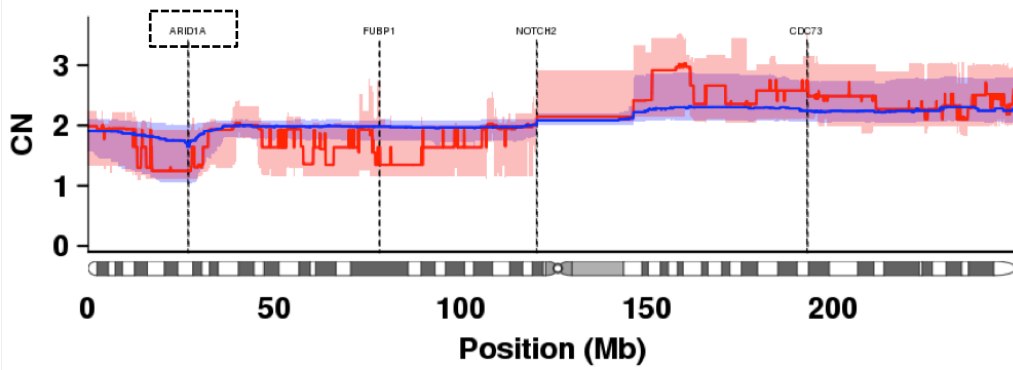

chr2

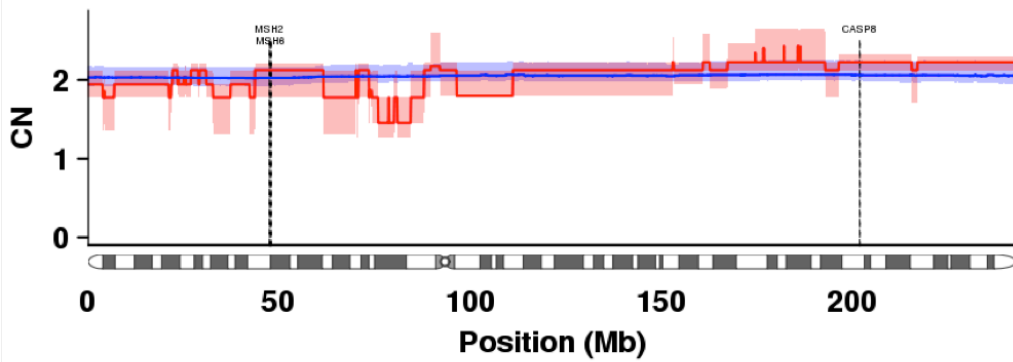

chr3

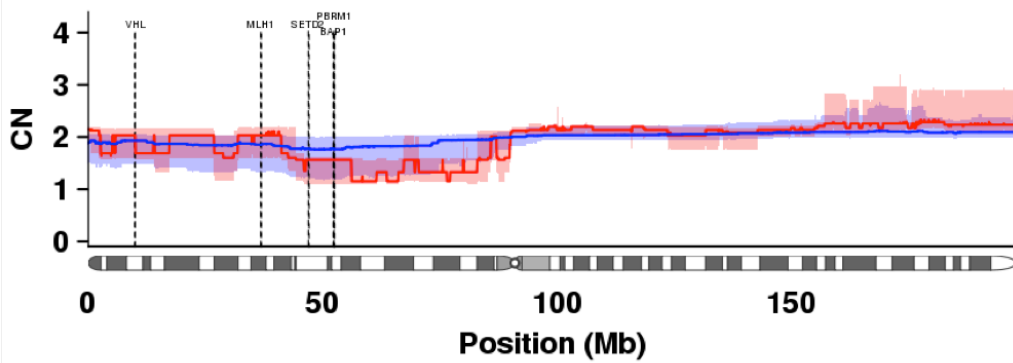

chr4

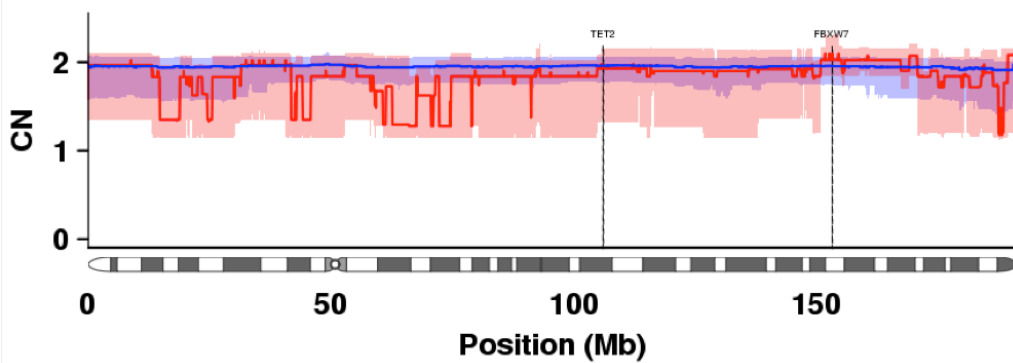

chr5

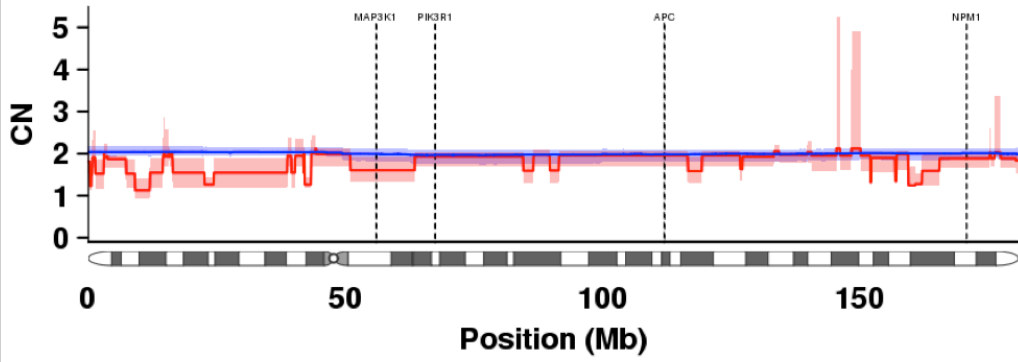

chr6

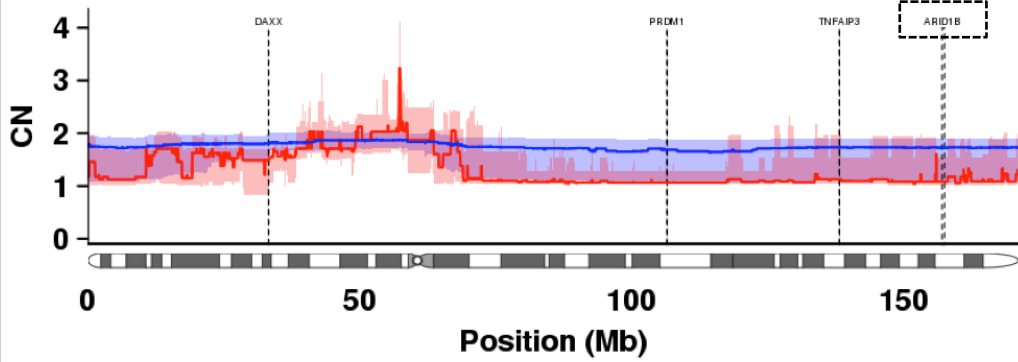

chr7

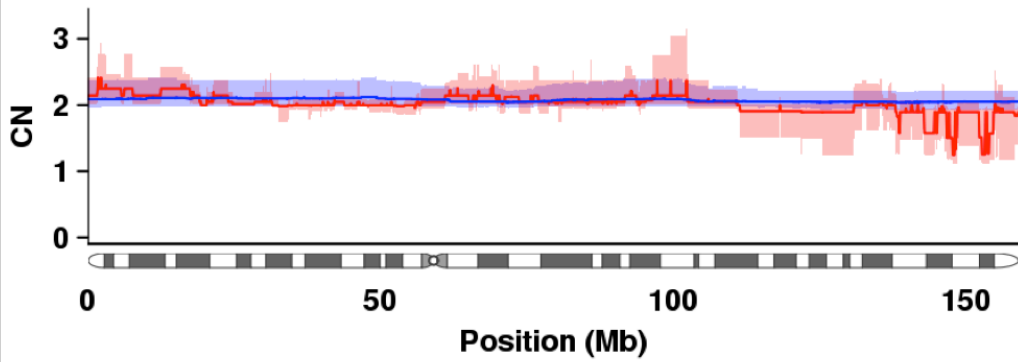

chr8

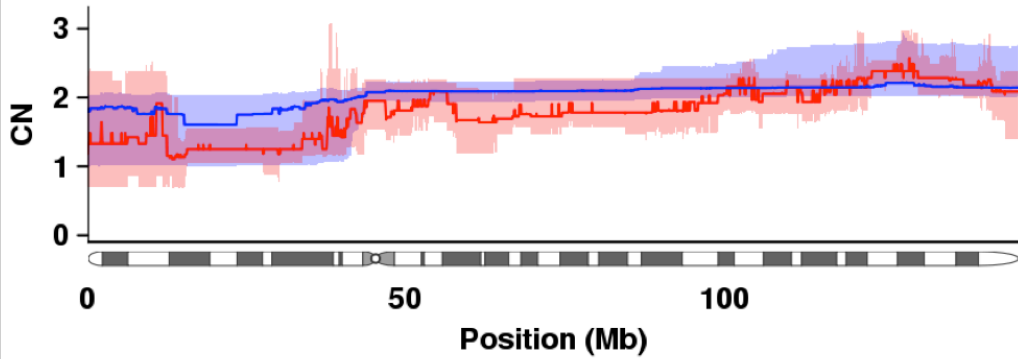

chr9

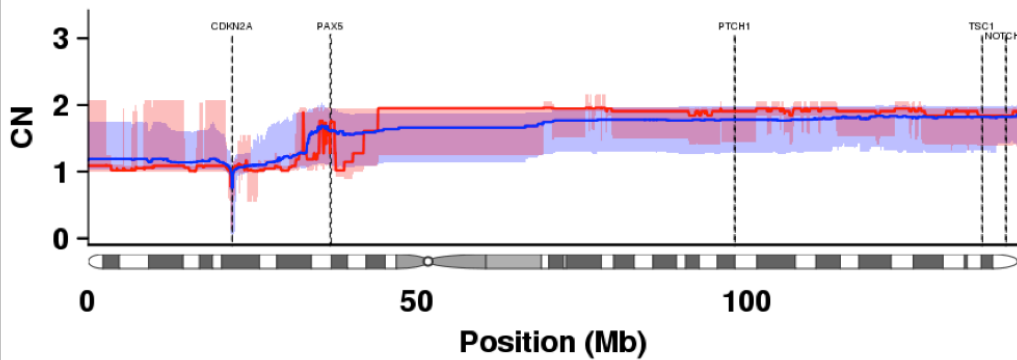

chr10

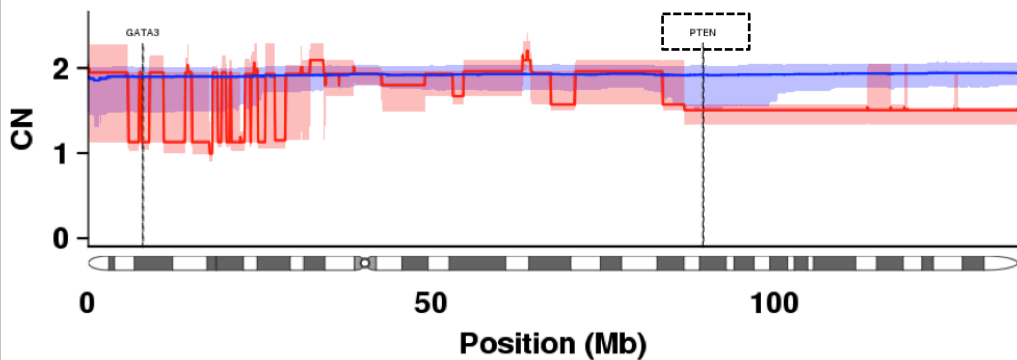

chr11

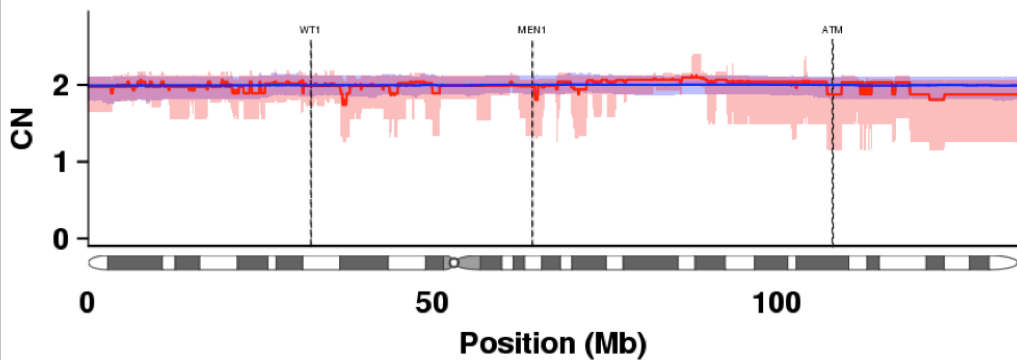

chr12

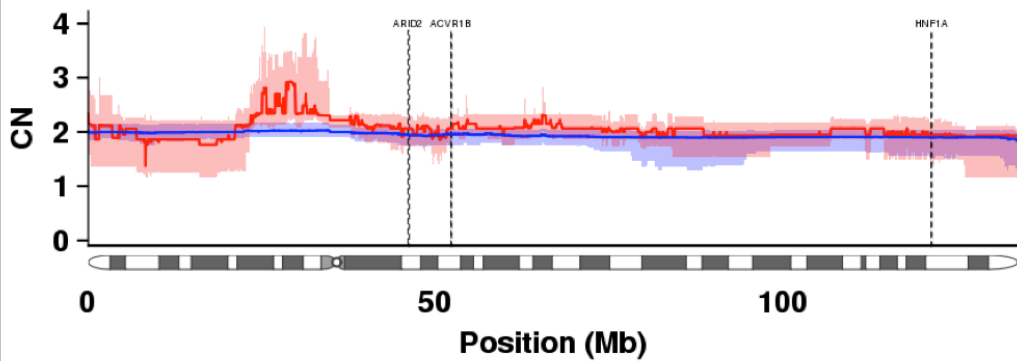

## chr13

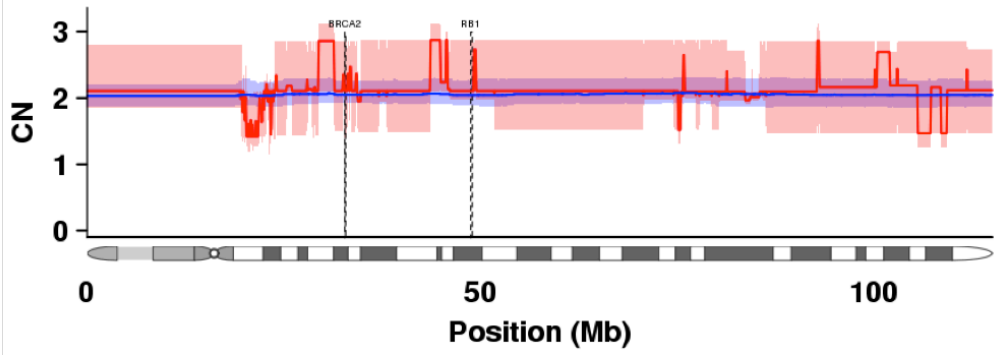

## chr14

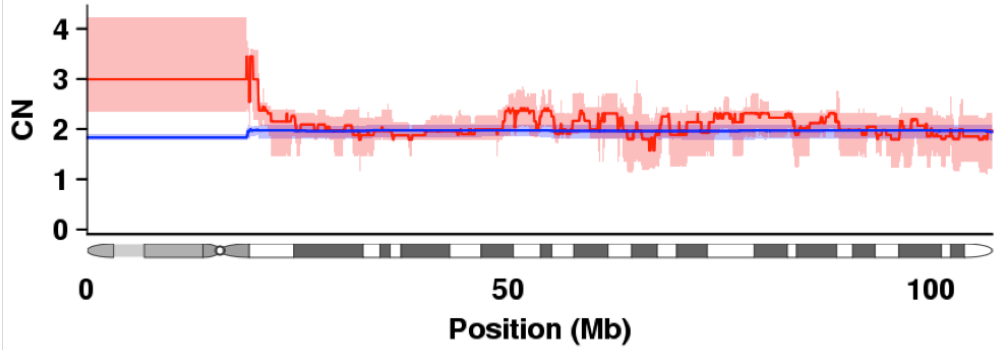

## chr15

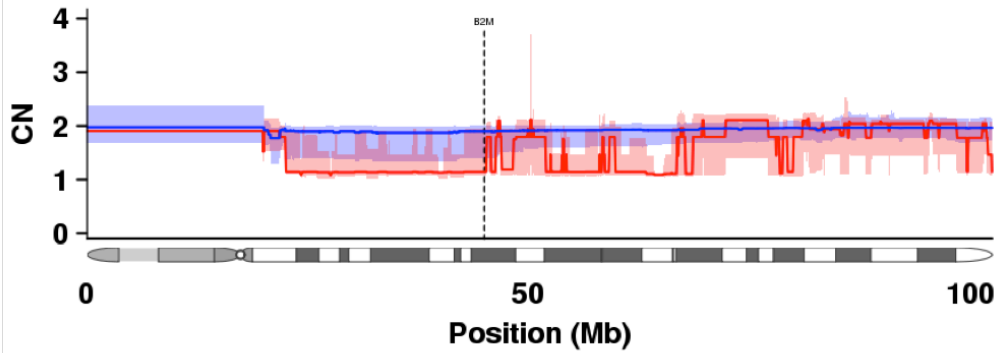

## chr16

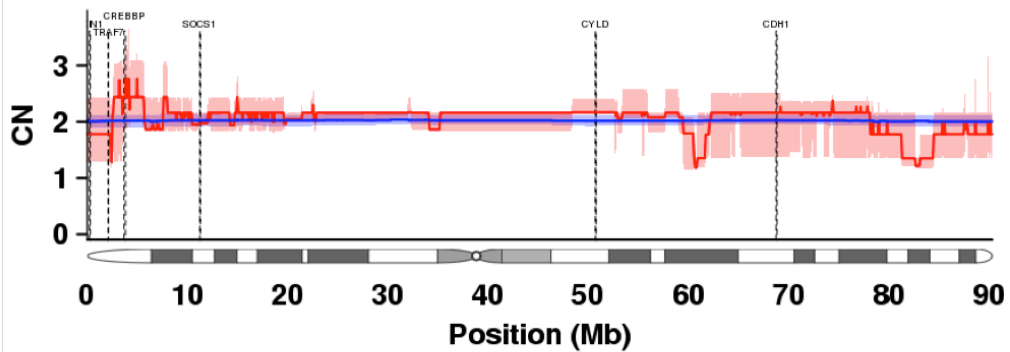

chr17

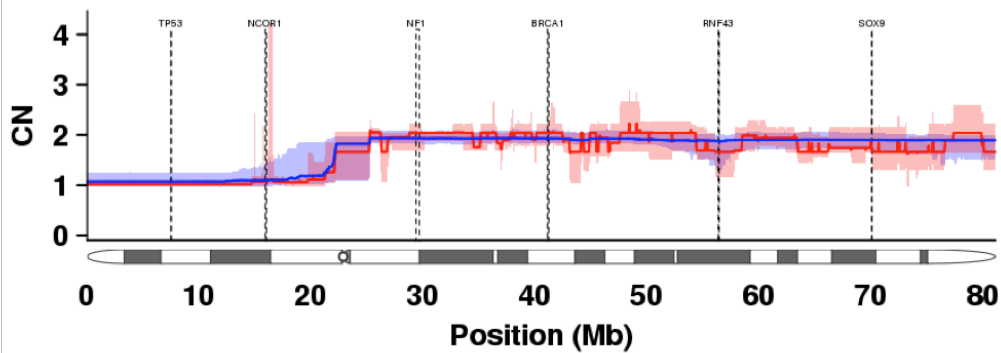

chr18

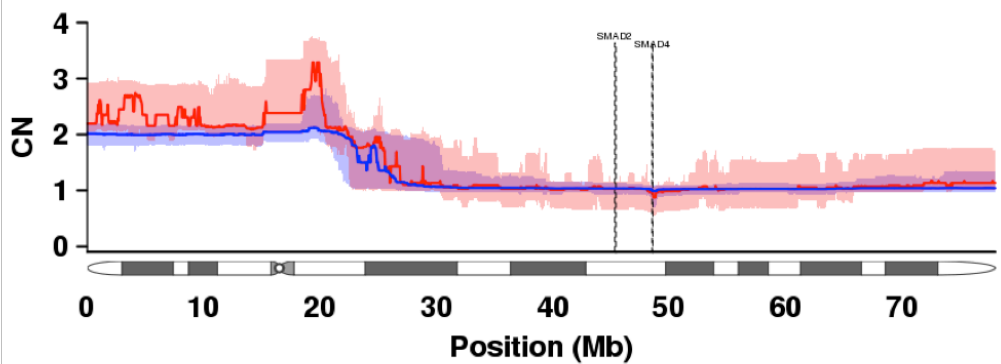

chr19

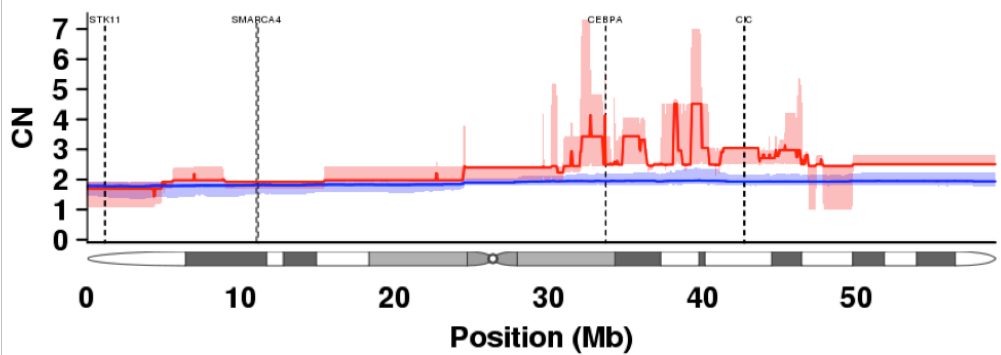

chr20

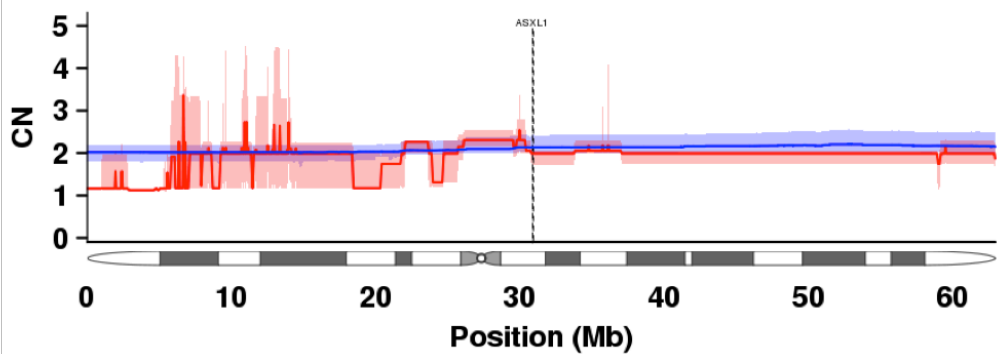

chr21

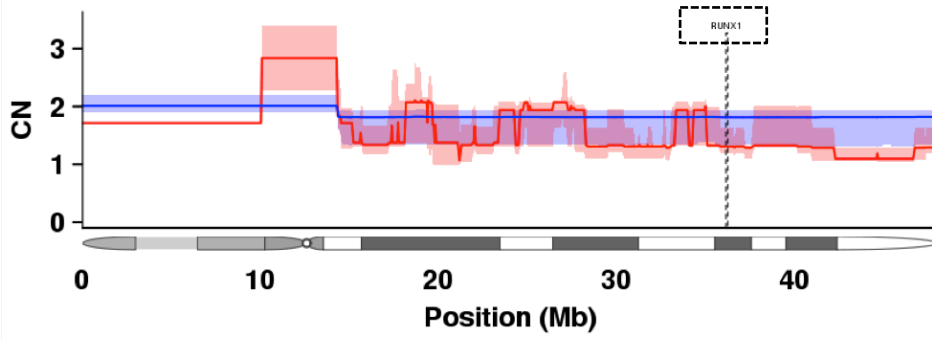

chr22

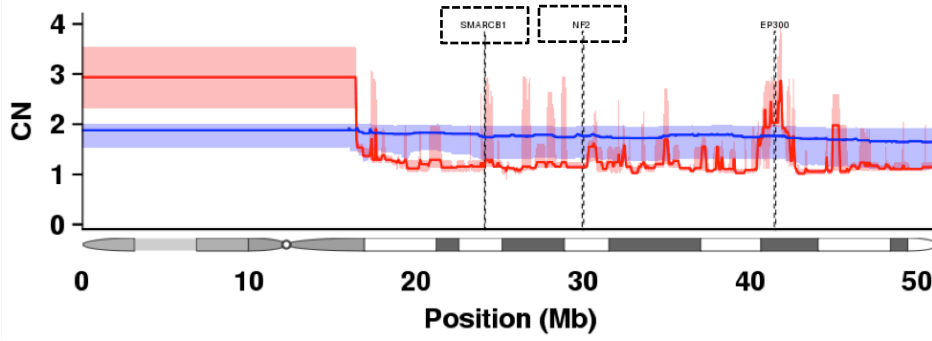

a

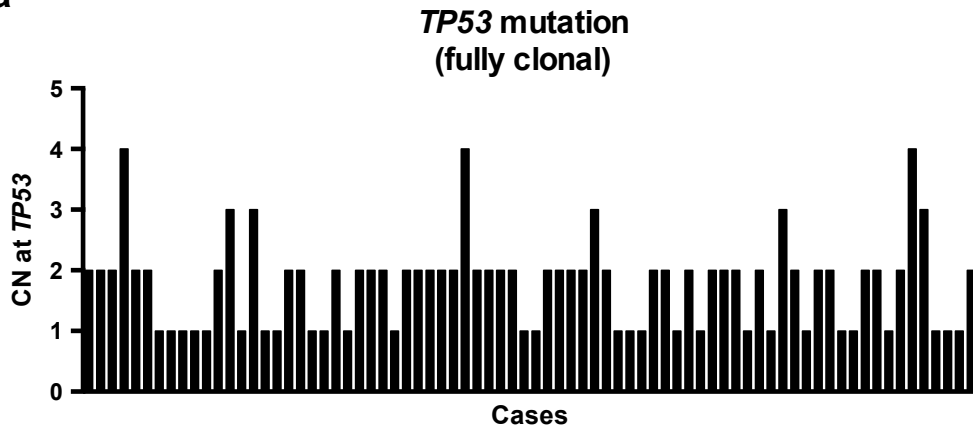

b

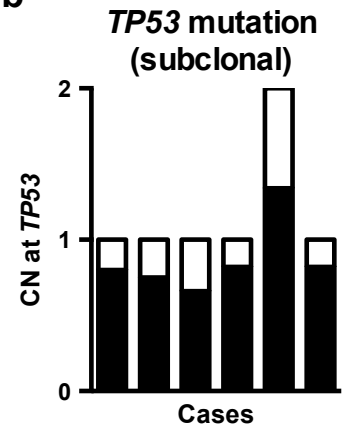

c

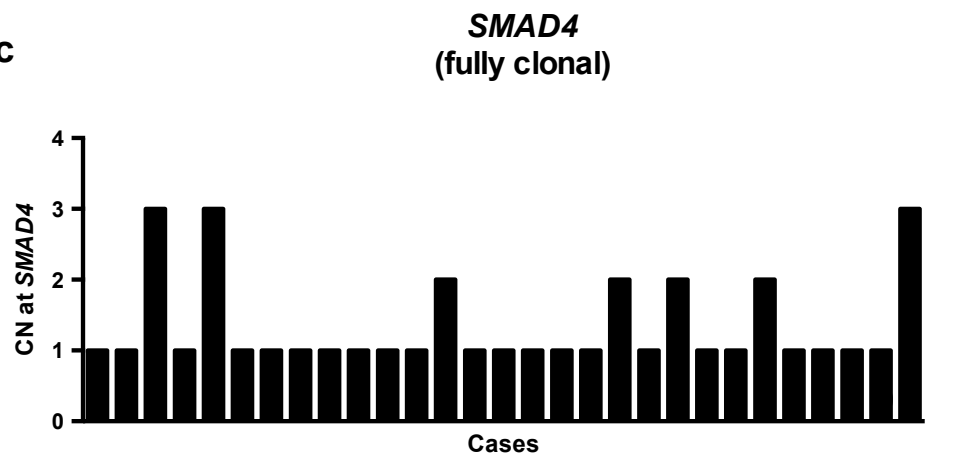

d

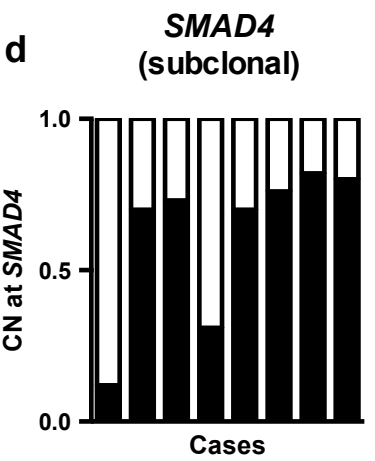

legend:

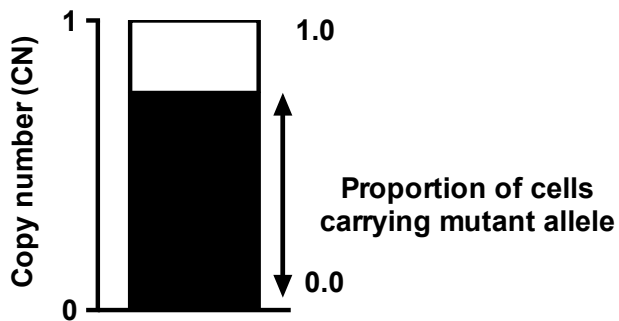



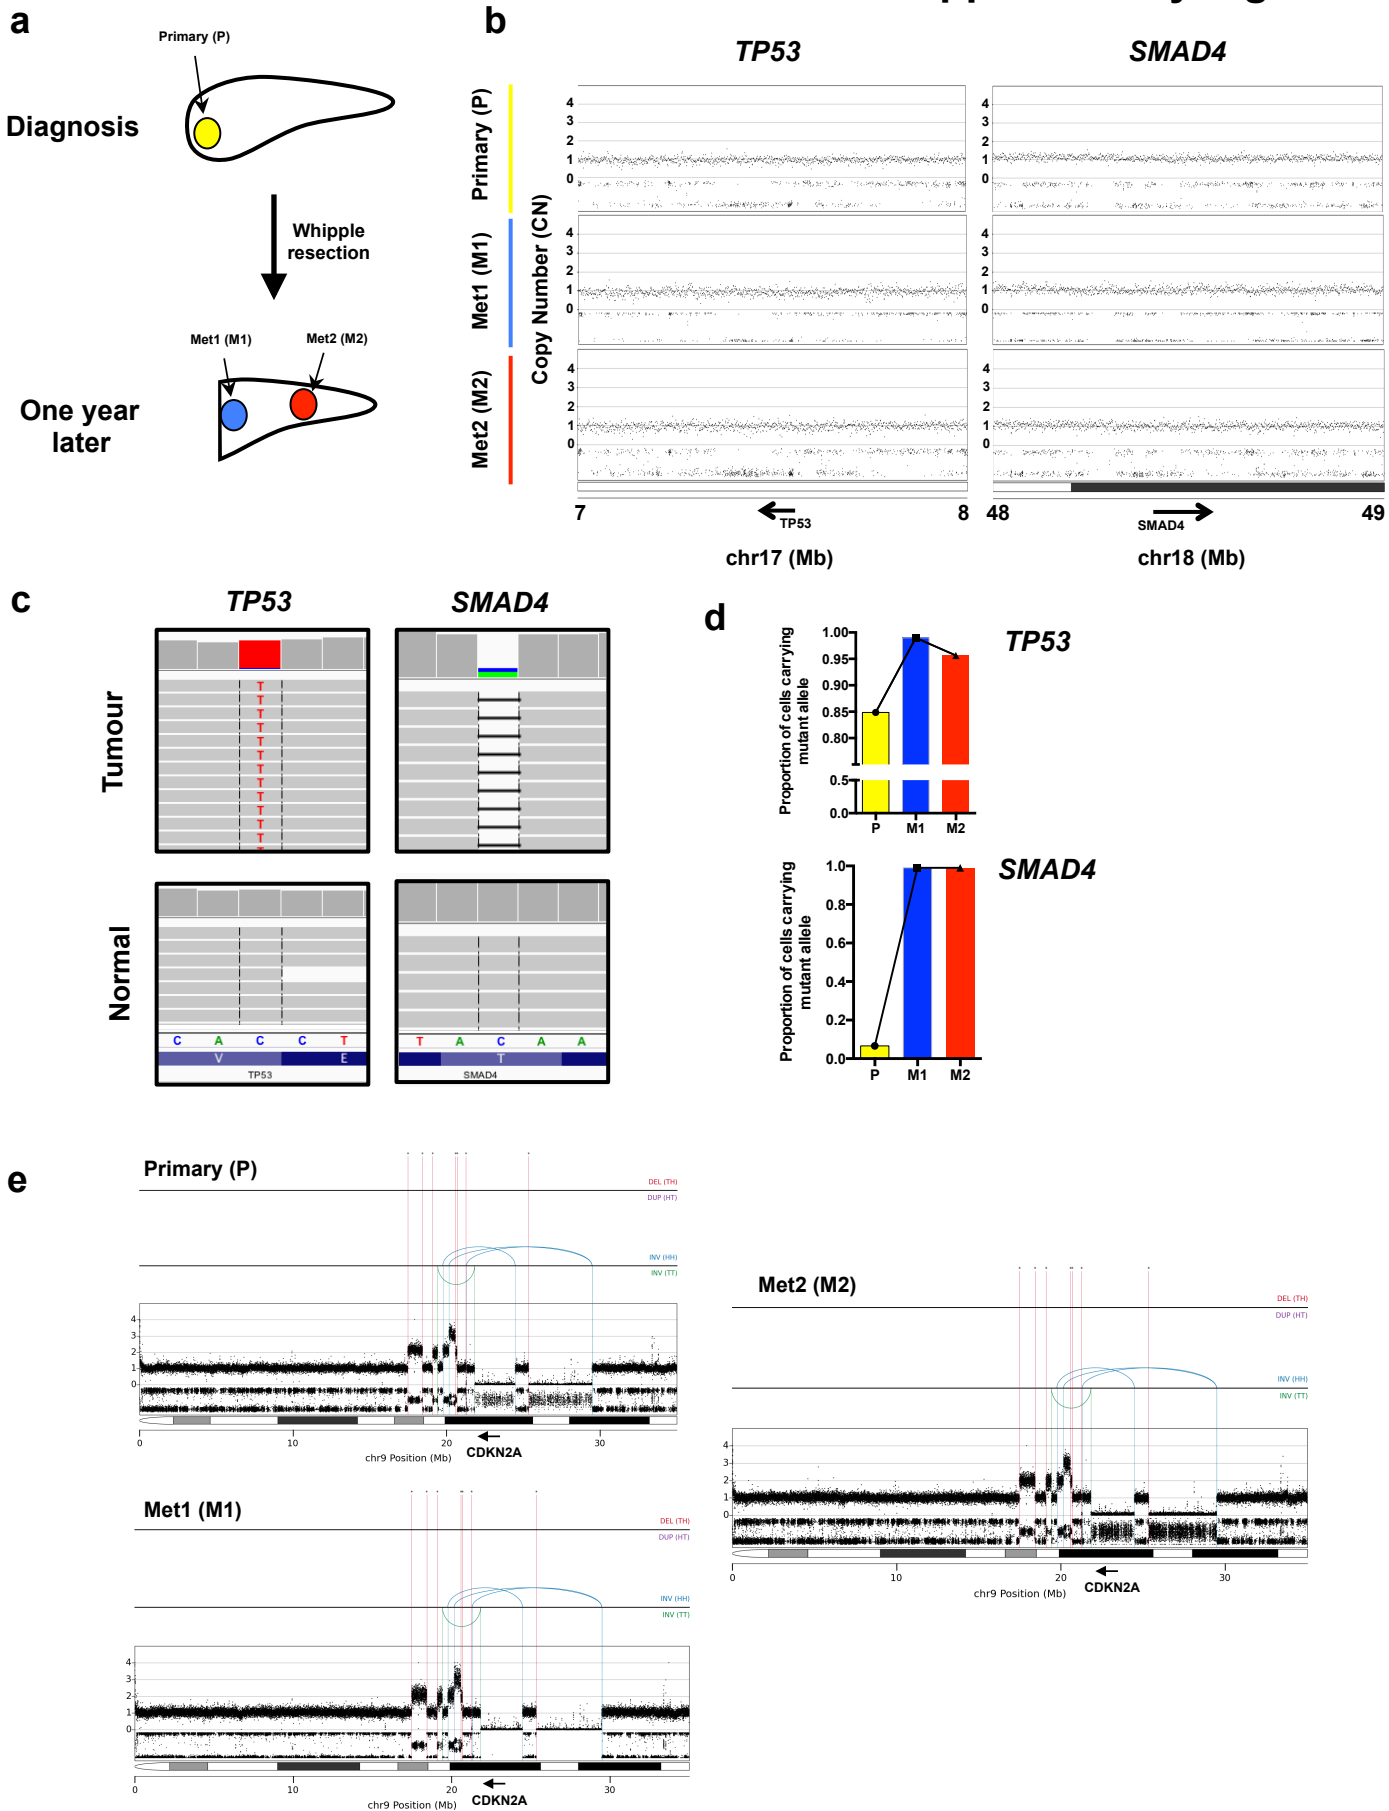

**b**

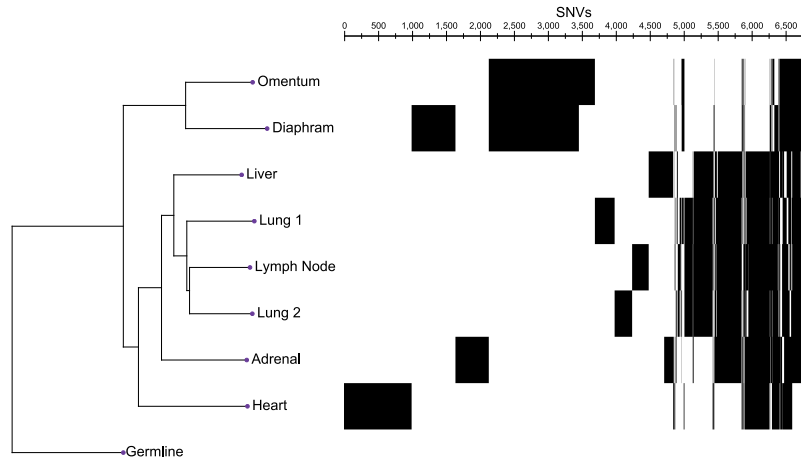

**a**

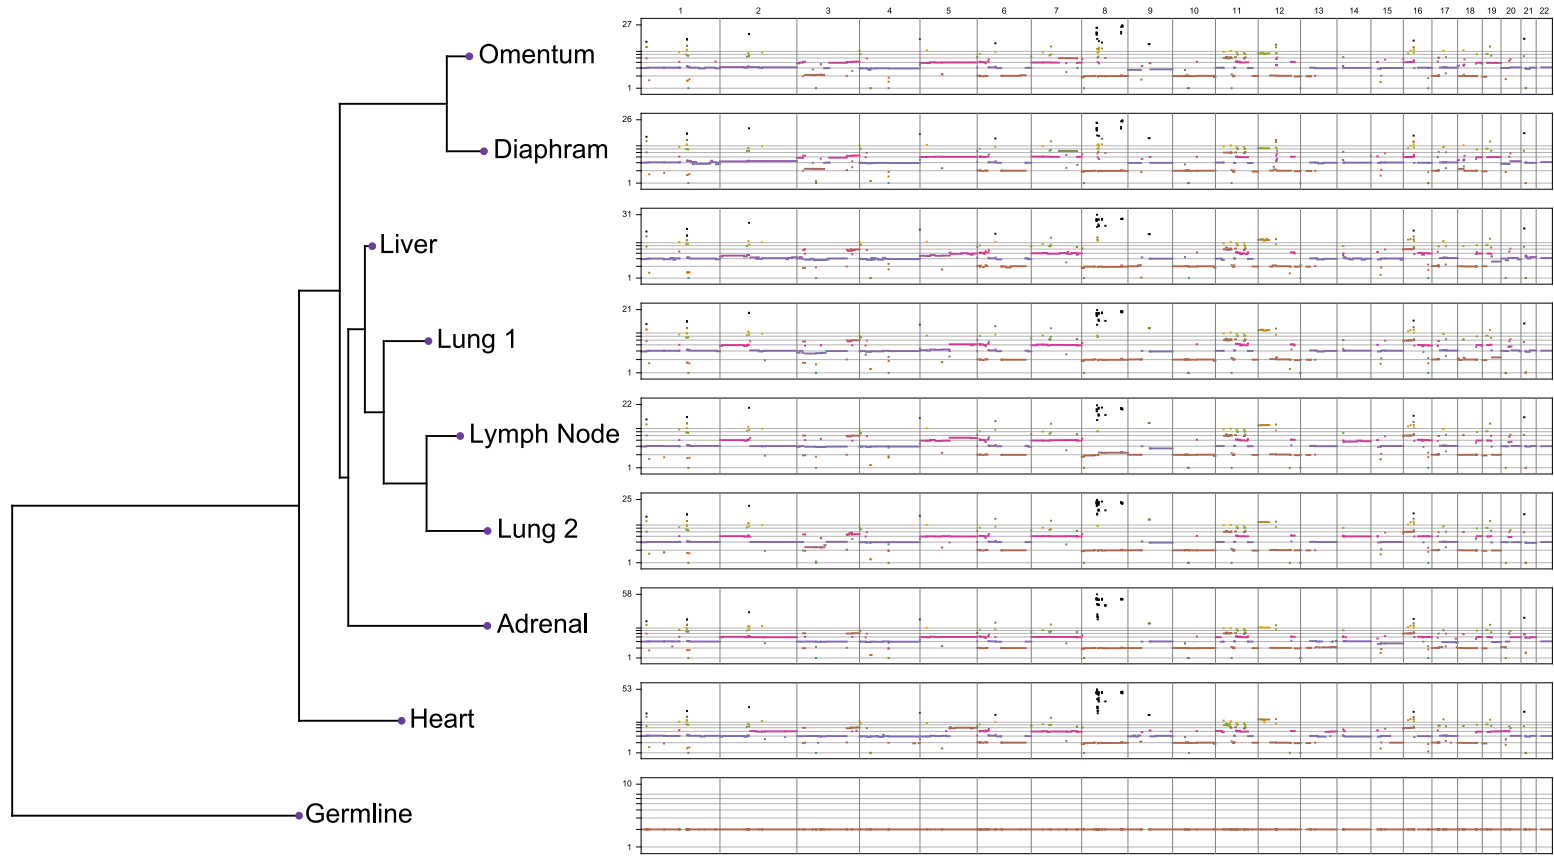

a.

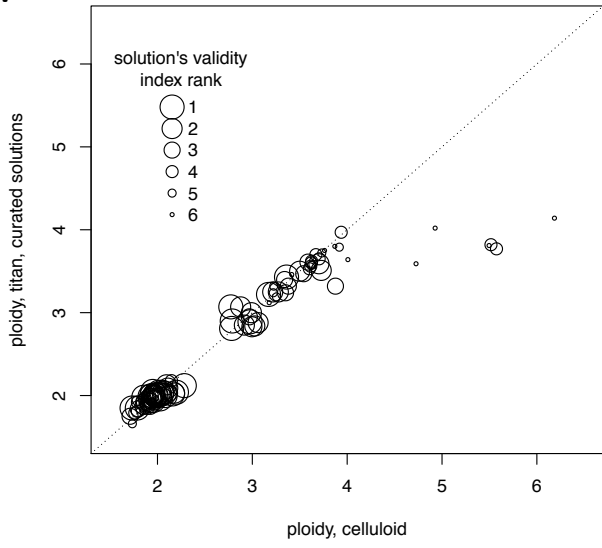

b.

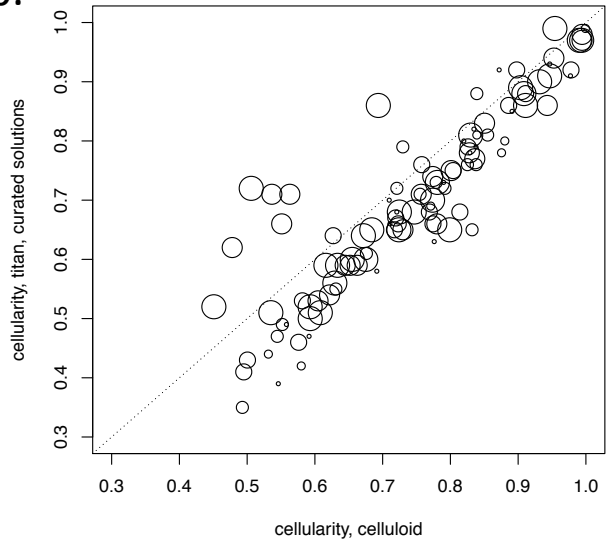

## TITAN (recommended)

## TITAN (curated)

## CELLULOID

## Validated Copy Number

Ashpc\_0005

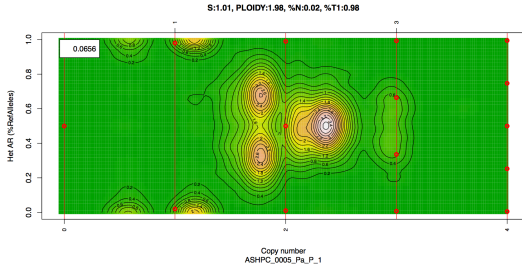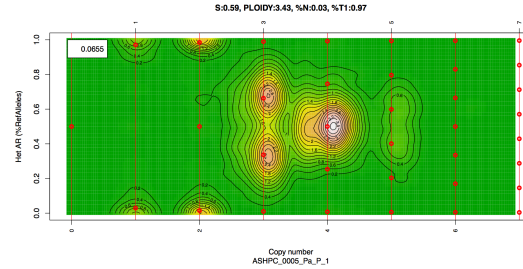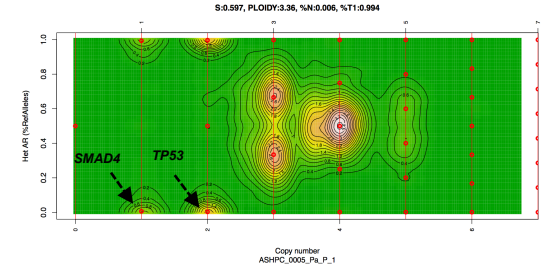

Ashpc\_0027

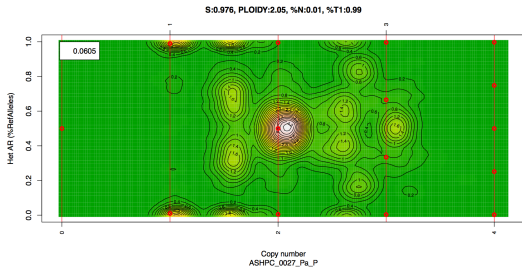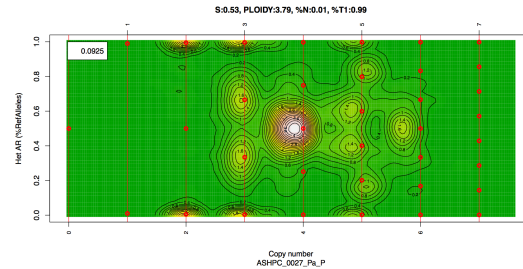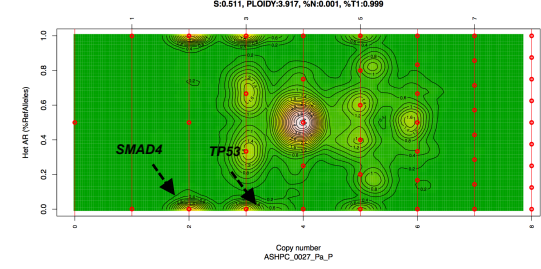

Ashpc\_0003

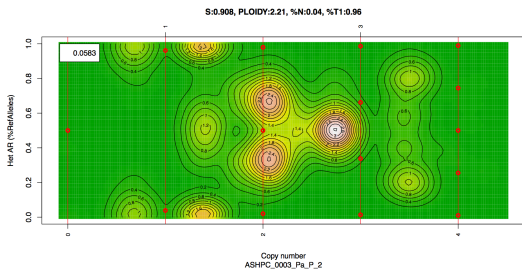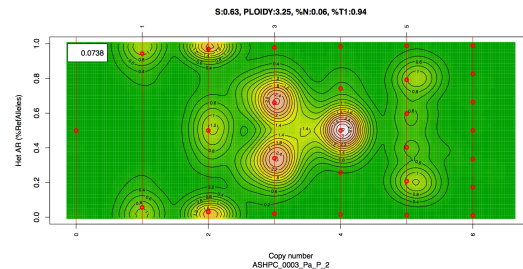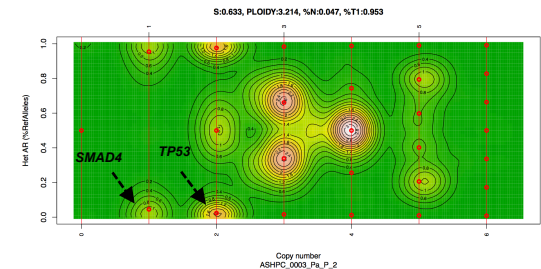

Pcsi\_0082

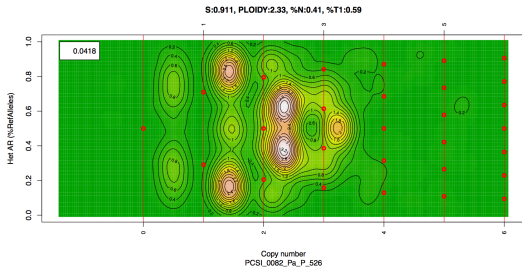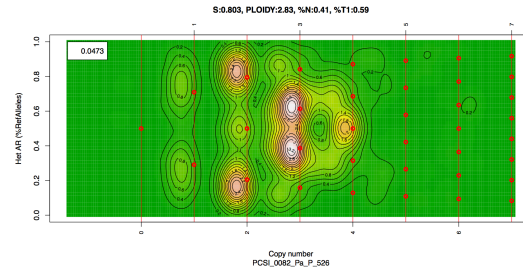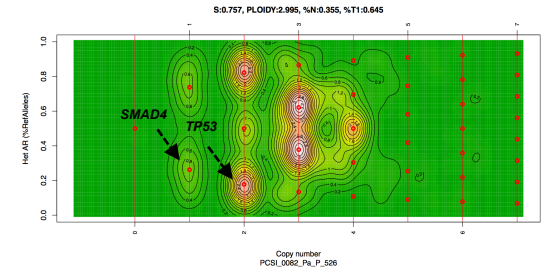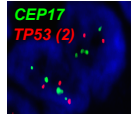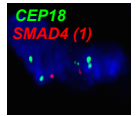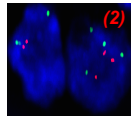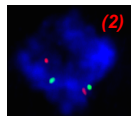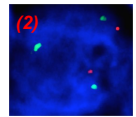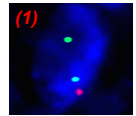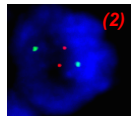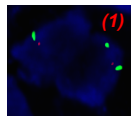

## TITAN (recommended)

## TITAN (curated)

## CELLULOID

## Validated Copy Number

Pcsi\_0099

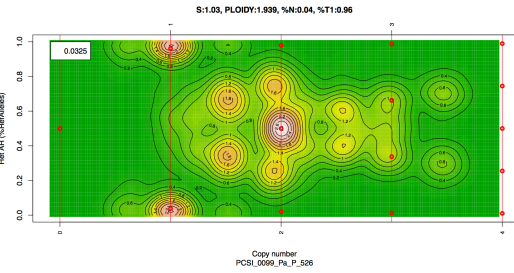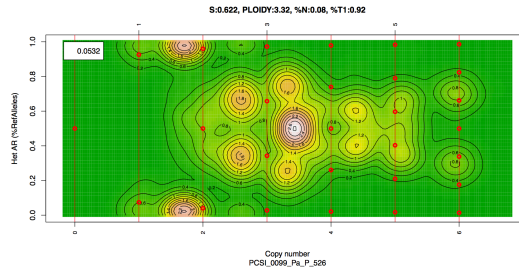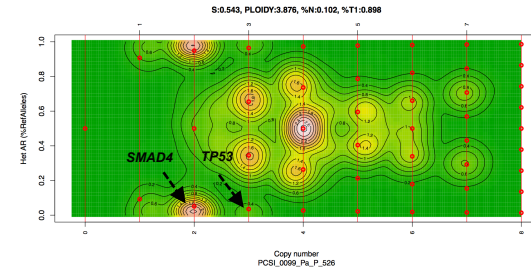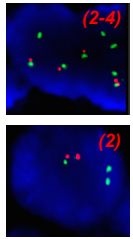

Ashpc\_0019

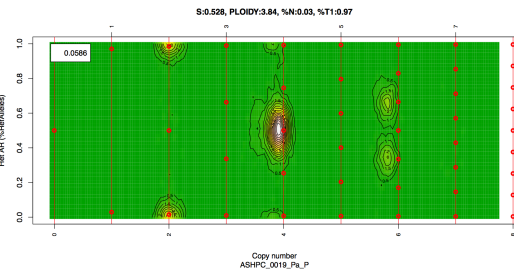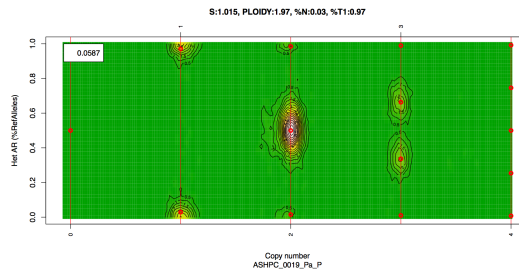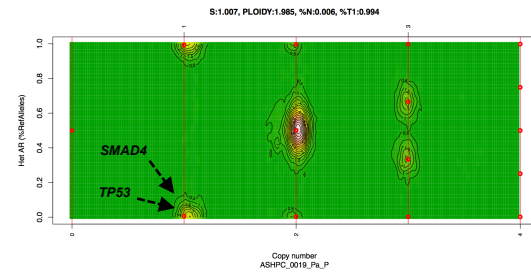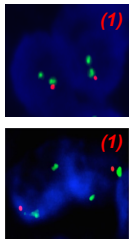

Ashpc\_0023

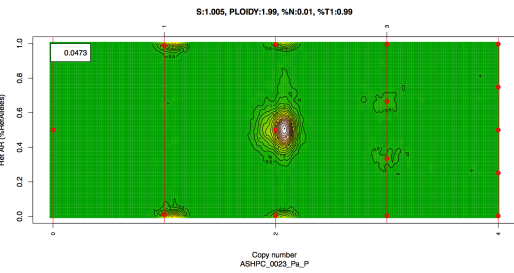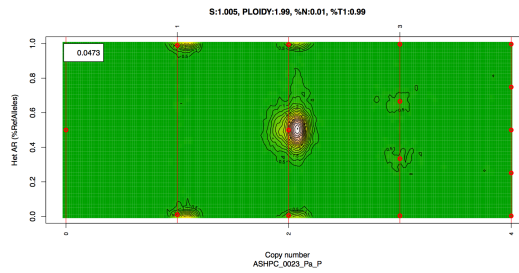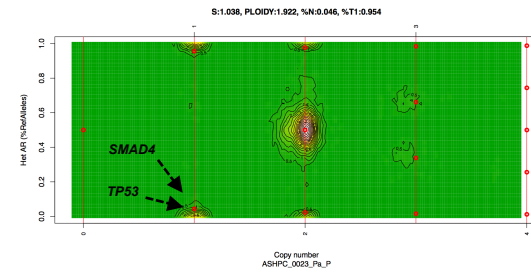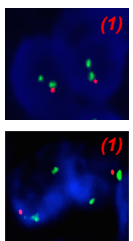

Ashpc\_0025

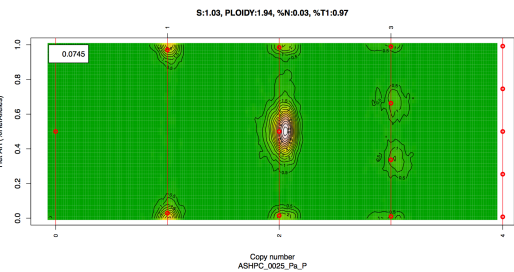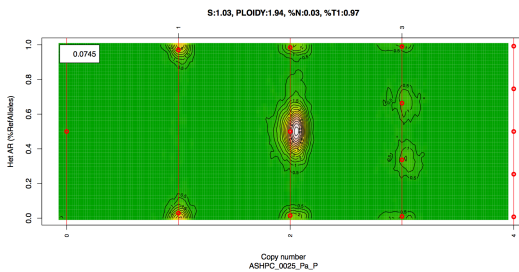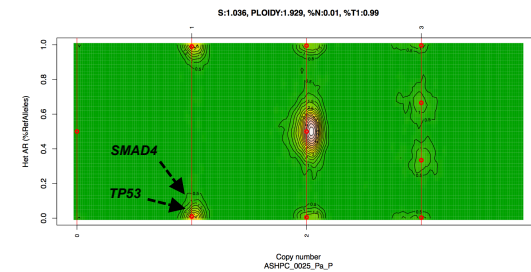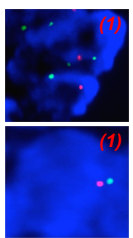

## TITAN (recommended)

## TITAN (curated)

## CELLULOID

## Validated Copy Number

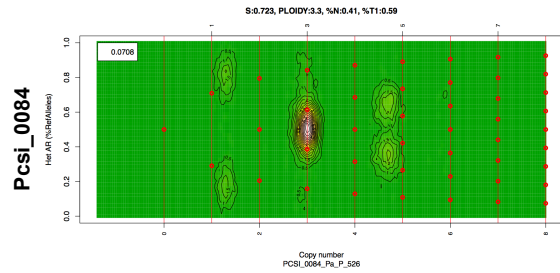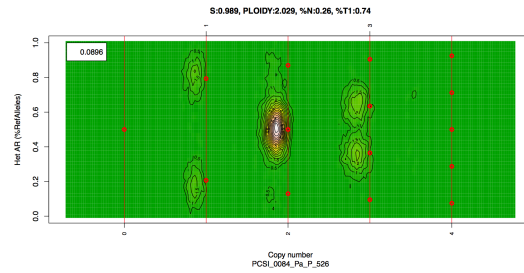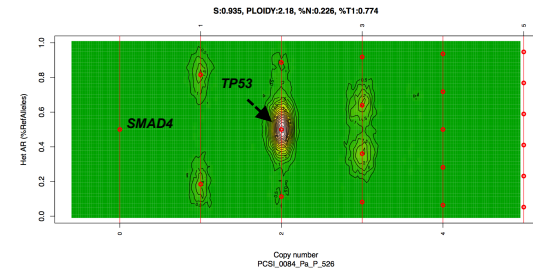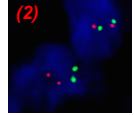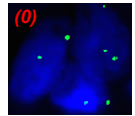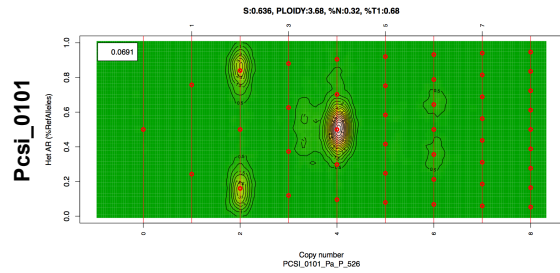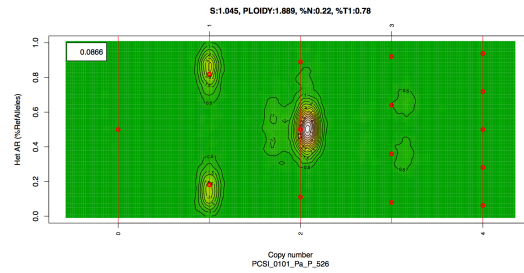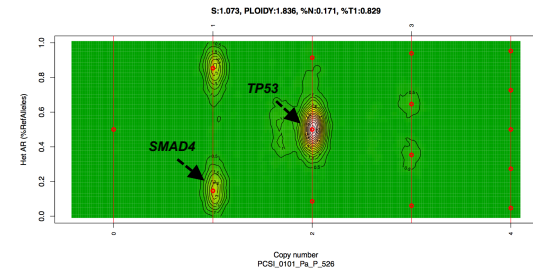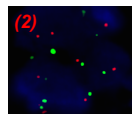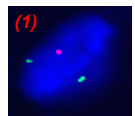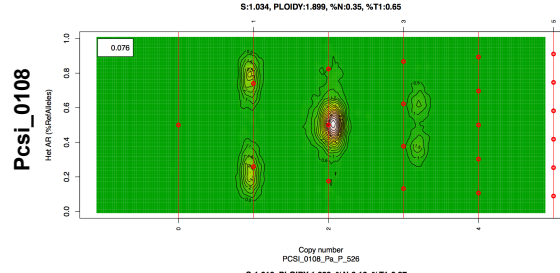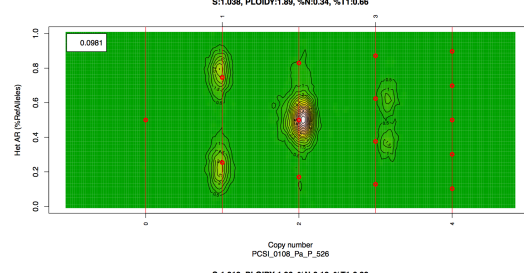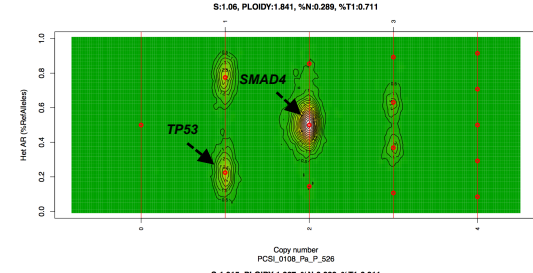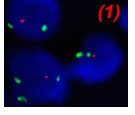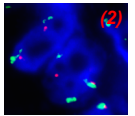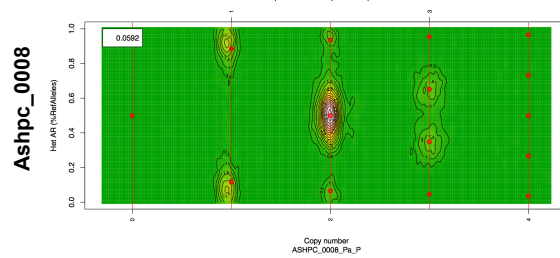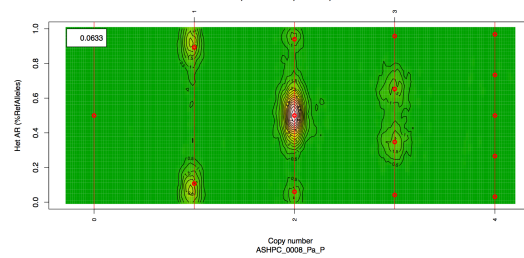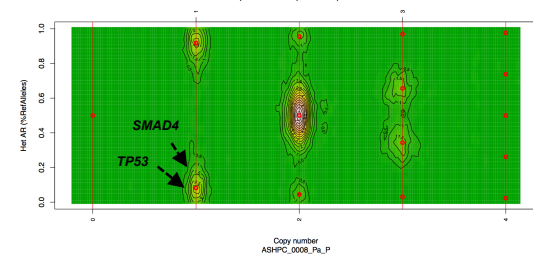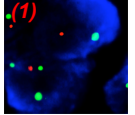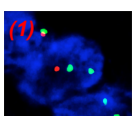



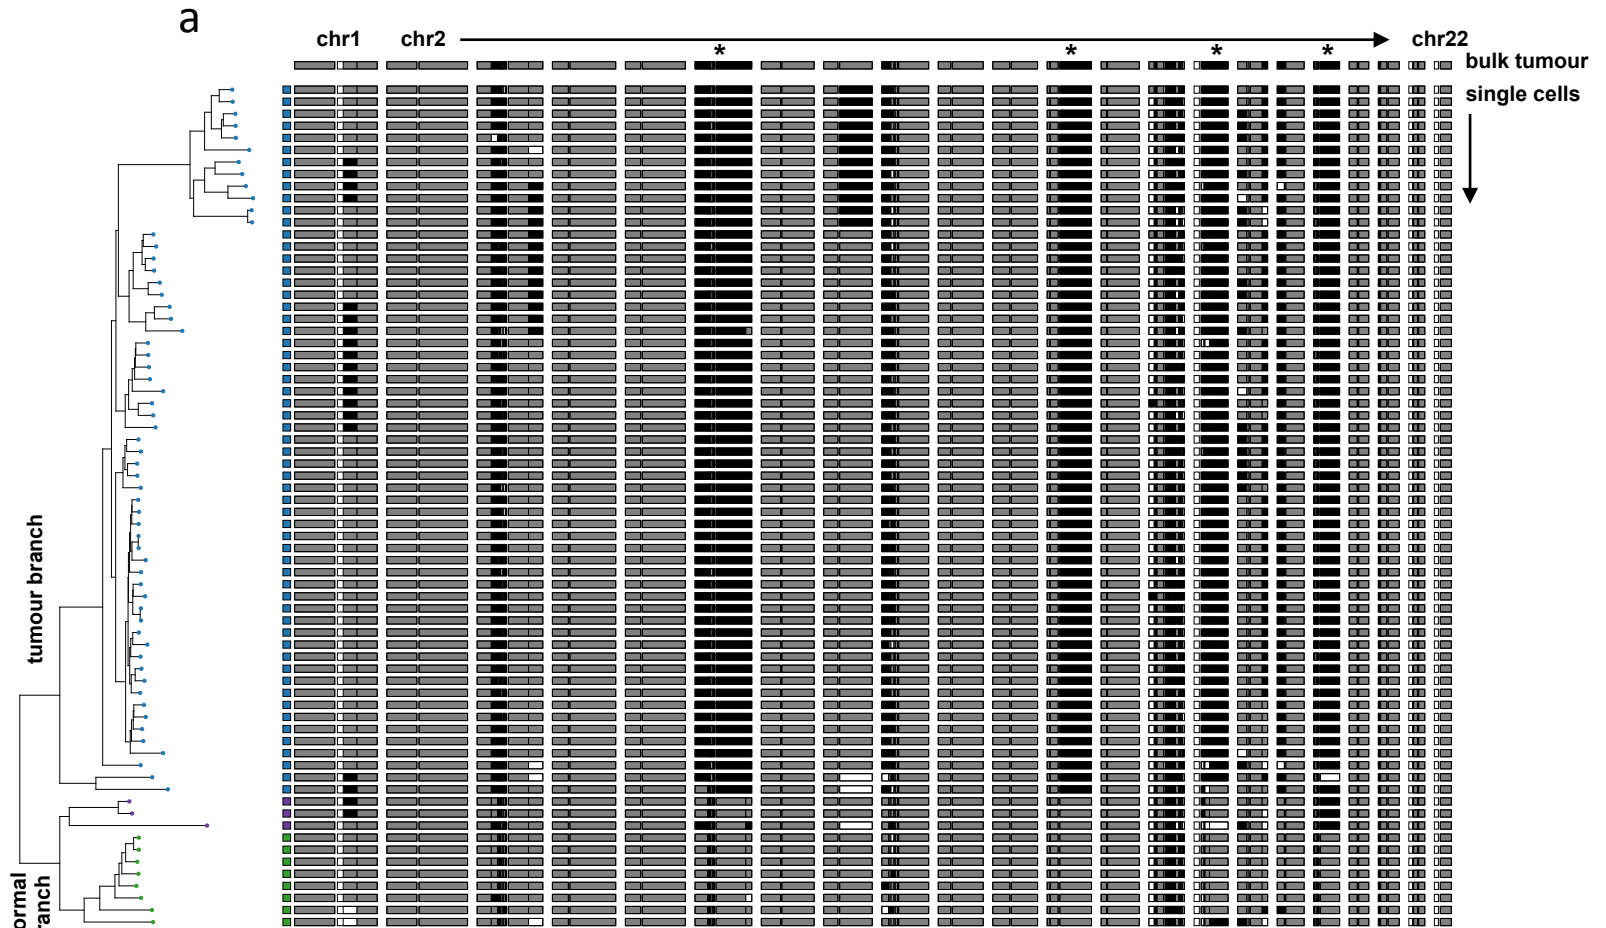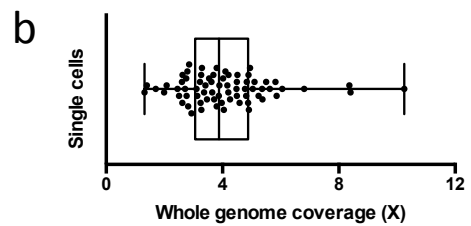

**Supplementary Table 1**

| <b>Variables</b>                            | <b>n=107 (100%)</b> |
|---------------------------------------------|---------------------|
| <b>Gender</b>                               |                     |
| Male                                        | 52 (49%)            |
| Female                                      | 55 (51%)            |
| <b>Age (years)</b>                          |                     |
| Mean                                        | 65.7                |
| Median                                      | 67                  |
| Range                                       | 41.0 - 87.0         |
| <b>Histological Subtype</b>                 |                     |
| Ductual Adenocarcinoma                      | 98 (92%)            |
| Ductual Adenocarcinoma with IPMN            | 7 (7%)              |
| Mucinous Adenocarcinoma                     | 2 (1%)              |
| <b>Histological Grade (differentiation)</b> |                     |
| Well                                        | 17 (16%)            |
| Moderate                                    | 50 (47%)            |
| Poor                                        | 35 (33%)            |
| Undifferentiated                            | 4 (4%)              |
| NA                                          | 1 (<1%)             |
| <b>T Stage</b>                              |                     |
| T1                                          | 2 (2%)              |
| T2                                          | 11 (10%)            |
| T3                                          | 90 (84%)            |
| T4                                          | 2 (2%)              |
| NA                                          | 2 (2%)              |
| <b>N Stage</b>                              |                     |
| N0                                          | 24 (22%)            |
| N1                                          | 80 (75%)            |
| NA                                          | 3 (3%)              |



**Supplementary Table 2: (images for events below are provided in Supplementary Figure 12)**

| Sample                 | Chromothripsis | Number of Events | Event(CR1) Reactions                                                                                | Event(CR2) Reactions                                                                                   |
|------------------------|----------------|------------------|-----------------------------------------------------------------------------------------------------|--------------------------------------------------------------------------------------------------------|
| ICGC_0006_Pa_P_8031121 | yes            | 2                | chr4:119141674-190583192, chr11:3857001-42860000                                                    | -                                                                                                      |
| ICGC_0007_Pa_P_8012199 | yes            | 2                | chr1:38807432-49403757, chr20:1220916-53876562                                                      | -                                                                                                      |
| ICGC_0009_Pa_P_8012321 | yes            | 1                | chr10:81878711-132340500                                                                            | -                                                                                                      |
| ICGC_0020_Pa_P_8067541 | yes            | 1                | chr11:19382658-73704272 + chr18:23746770-70216075 + chr6:14869820-98354849                          | -                                                                                                      |
| ICGC_0021_Pa_P_8015109 | yes            | 2                | chr18:388221-19388487, chr19:28272240-58070000                                                      | -                                                                                                      |
| ICGC_0025_Pa_P_8012211 | yes            | 2                | -                                                                                                   | chr1:152793001-227435776, chr11:19268841-82026000 + chr2:194317737-200534000 + chr4:54977001-178340245 |
| ICGC_0026_Pa_P_8014825 | no             | 0                | -                                                                                                   | -                                                                                                      |
| ICGC_0031_Pa_P_8014807 | yes            | 1                | chr3:20313547-191370000 + chr7:90171001-147405313                                                   | -                                                                                                      |
| ICGC_0037_Pa_P_8015259 | yes            | 1                | chr13:22601936-91517618 + chr5:27822135-101940729 + chr8:31057842-33184912 + chr9:10485425-84628448 | -                                                                                                      |
| ICGC_0051_Pa_P_8015277 | no             | 0                | -                                                                                                   | -                                                                                                      |
| ICGC_0052_Pa_P_8015858 | no             | 0                | -                                                                                                   | -                                                                                                      |
| ICGC_0053_Pa_P_8064559 | yes            | 1                | chr6:12284188-65918328 + chr7:61963702-138259000                                                    | -                                                                                                      |
| ICGC_0054_Pa_P_8016486 | no             | 0                | -                                                                                                   | -                                                                                                      |
| ICGC_0055_Pa_P_8016498 | no             | 0                | -                                                                                                   | -                                                                                                      |
| ICGC_0059_Pa_P_8030340 | yes            | 1                | chr3:78125968-190531000                                                                             | -                                                                                                      |
| ICGC_0061_Pa_P_8030032 | no             | 0                | -                                                                                                   | -                                                                                                      |
| ICGC_0063_Pa_P_8030353 | yes            | 1                | chr1:44735953-91085000                                                                              | -                                                                                                      |
| ICGC_0066_Pa_P_8031681 | yes            | 1                | chr15:23935953-39587428                                                                             | -                                                                                                      |
| ICGC_0069_Pa_P_8053200 | yes            | 1                | chr15:62553001-96296030                                                                             | -                                                                                                      |
| ICGC_0075_Pa_P_8014187 | no             | 0                | -                                                                                                   | -                                                                                                      |
| ICGC_0087_Pa_P_8033523 | yes            | 2                | chr7:17118521-62393134 + chrX:150743716-150756151                                                   | chr10:60719577-84096607                                                                                |
| ICGC_0088_Pa_P_8032817 | yes            | 1                | chr17:11412234-61138000 + chr18:22984960-59090269                                                   | -                                                                                                      |
| ICGC_0099_Pa_P_8067507 | no             | 0                | -                                                                                                   | -                                                                                                      |
| ICGC_0103_Pa_P_8031073 | no             | 0                | -                                                                                                   | -                                                                                                      |
| ICGC_0105_Pa_P_8031085 | no             | 0                | -                                                                                                   | -                                                                                                      |
| ICGC_0108_Pa_P_8029781 | yes            | 3                | chr19:787019-40699181, chr10:64265789-78493082 + chr18:4869120-22568155 + chr20:11625346-12862531   | chr16:2038476-21189028 + chr8:130576805-136046121                                                      |
| ICGC_0109_Pa_P_8031146 | yes            | 1                | chr21:42789811-43243876 + chr5:55531001-177534040                                                   | -                                                                                                      |
| ICGC_0114_Pa_P_8044091 | yes            | 3                | chr1:32132001-65797000, chr6:92940001-139752552                                                     | chr2:12368001-45055653                                                                                 |
| ICGC_0115_Pa_P_8031668 | yes            | 1                | -                                                                                                   | chr13:70447001-94109000                                                                                |
| ICGC_0124_Pa_P_8068548 | no             | 0                | -                                                                                                   | -                                                                                                      |
| ICGC_0134_Pa_P_8034252 | no             | 0                | -                                                                                                   | -                                                                                                      |
| ICGC_0135_Pa_P_8034278 | no             | 0                | -                                                                                                   | -                                                                                                      |
| ICGC_0140_Pa_P_8035555 | no             | 0                | -                                                                                                   | -                                                                                                      |

| Sample                 | Chromothripsis | Number of Events | Event(CR1) Reactions                                                                                                         | Event(CR2) Reactions                                                  |
|------------------------|----------------|------------------|------------------------------------------------------------------------------------------------------------------------------|-----------------------------------------------------------------------|
| ICGC_0141_Pa_P_8043971 | no             | 0                | -                                                                                                                            | -                                                                     |
| ICGC_0144_Pa_P_8035693 | no             | 0                | -                                                                                                                            | -                                                                     |
| ICGC_0146_Pa_P_8043983 | yes            | 2                | chr10:3245988-120473283 + chr3:23871307-74921000 + chr5:10334406-14659841, chr11:44267469-122915221 + chr5:65165957-65213263 | -                                                                     |
| ICGC_0150_Pa_P_8066037 | yes            | 1                | chr19:14991001-24027955 + chrY:7917901-8070966                                                                               | -                                                                     |
| ICGC_0169_Pa_P_8044594 | yes            | 1                | chr14:44497557-78996543                                                                                                      | -                                                                     |
| ICGC_0185_Pa_P_8057676 | no             | 0                | -                                                                                                                            | -                                                                     |
| ICGC_0188_Pa_P_8044983 | no             | 0                | -                                                                                                                            | -                                                                     |
| ICGC_0192_Pa_P_8068554 | no             | 0                | -                                                                                                                            | -                                                                     |
| ICGC_0199_Pa_P_8057479 | yes            | 1                | chr2:109779001-139791000                                                                                                     | -                                                                     |
| ICGC_0201_Pa_P_8057482 | yes            | 1                | chr21:14704472-41675000 + chr8:18756001-25760000                                                                             | -                                                                     |
| ICGC_0206_Pa_P_8031544 | yes            | 1                | -                                                                                                                            | chr18:20981938-27796673                                               |
| ICGC_0207_Pa_P_8031704 | yes            | 1                | -                                                                                                                            | chr7:121028865-151116416                                              |
| ICGC_0212_Pa_P_8035633 | no             | 0                | -                                                                                                                            | -                                                                     |
| ICGC_0214_Pa_P_8051974 | yes            | 4                | chr1:196993875-239103445, chr1:33852332-33865200 + chr2:1473001-230678821 + chr4:27184750-162020226 + chr6:16963400-24709000 | chrX:98097871-154472372, chr8:298610-1625901 + chr9:18780346-36541180 |
| ICGC_0215_Pa_P_8052570 | no             | 0                | -                                                                                                                            | -                                                                     |
| ICGC_0217_Pa_P_8065126 | yes            | 1                | -                                                                                                                            | chrX:136982418-147033291                                              |
| ICGC_0223_Pa_P_8057484 | no             | 0                | -                                                                                                                            | -                                                                     |
| ICGC_0224_Pa_P_8057490 | no             | 0                | -                                                                                                                            | -                                                                     |
| ICGC_0230_Pa_P_8068563 | no             | 0                | -                                                                                                                            | -                                                                     |
| ICGC_0235_Pa_P_8050939 | yes            | 1                | chr11:9746226-73065000 + chr12:40995001-116758747 + chr1:168543716-169262776                                                 | -                                                                     |
| ICGC_0295_Pa_P_8058336 | no             | 0                | -                                                                                                                            | -                                                                     |
| ICGC_0296_Pa_P_8057714 | yes            | 1                | chr18:2188460-21883265 + chr7:70084135-72295679                                                                              | -                                                                     |
| ICGC_0300_Pa_P_8058344 | yes            | 2                | chr1:31664933-242106869, chr13:27869960-52828178 + chr9:20973001-68222000                                                    | -                                                                     |
| ICGC_0301_Pa_P_8068579 | yes            | 1                | chr18:25566441-75681666                                                                                                      | -                                                                     |
| ICGC_0303_Pa_P_8058184 | yes            | 1                | chr17:28709866-50798662                                                                                                      | -                                                                     |
| ICGC_0304_Pa_P_8058330 | yes            | 1                | chr18:1484781-31587000                                                                                                       | -                                                                     |
| ICGC_0309_Pa_P_8058339 | yes            | 1                | chr17:11446622-56223367 + chr3:65172798-101912639 + chrX:23483143-23579966                                                   | -                                                                     |
| ICGC_0312_Pa_P_8058333 | no             | 0                | -                                                                                                                            | -                                                                     |
| ICGC_0315_Pa_P_8049223 | no             | 0                | -                                                                                                                            | -                                                                     |
| ICGC_0321_Pa_P_8061178 | no             | 0                | -                                                                                                                            | -                                                                     |
| ICGC_0326_Pa_P_8061105 | yes            | 2                | chr12:73739582-128134138 + chr15:86999782-87157000, chr18:20632703-75024999 + chr20:2720376-15316884                         | -                                                                     |
| ICGC_0338_Pa_P_8064632 | no             | 0                | -                                                                                                                            | -                                                                     |
| ICGC_0391_Pa_P_8067175 | no             | 0                | -                                                                                                                            | -                                                                     |
| ICGC_0392_Pa_P_8067180 | yes            | 2                | chr6:26366154-56659000 + chr8:24080552-130012489, chr12:12083354-58332929 + chr17:19426001-76916717 + chr7:89474527-92364151 | -                                                                     |

| Sample                 | Chromothripsis | Number of Events | Event(CR1) Reactions                                                                                                         | Event(CR2) Reactions                             |
|------------------------|----------------|------------------|------------------------------------------------------------------------------------------------------------------------------|--------------------------------------------------|
| ICGC_0393_Pa_P_8067182 | yes            | 2                | chr13:24905001-114487669 + chr22:19442148-51029010                                                                           | chr3:118842791-159597000                         |
| ICGC_0395_Pa_P_8066852 | yes            | 1                | chr7:86035902-153368549                                                                                                      | -                                                |
| ICGC_0406_Pa_P_8067211 | no             | 0                | -                                                                                                                            | -                                                |
| ICGC_0412_Pa_P_8067226 | yes            | 1                | chr18:3346945-25568170                                                                                                       | -                                                |
| ICGC_0415_Pa_P_8067232 | yes            | 2                | chr9:10009001-21759698, chr17:26762993-79337786 + chr18:1927686-31124924                                                     | -                                                |
| ICGC_0419_Pa_P_8067242 | yes            | 2                | chr2:33805559-80731252, chr21:16555068-46488206                                                                              | -                                                |
| ICGC_0420_Pa_P_8067246 | yes            | 1                | chr12:27339001-85853159                                                                                                      | -                                                |
| ICGC_0486_Pa_P_8068564 | yes            | 3                | chr2:95882001-200539577, chr10:907872-92767218 + chr21:10861001-35164441 + chr4:65693783-160611077 + chr6:43279902-138568410 | chr18:28018001-35175000                          |
| ICGC_0502_Pa_P_8068976 | yes            | 1                | chr5:23463169-45911622                                                                                                       | -                                                |
| ICGC_0503_Pa_P_8069319 | no             | 0                | -                                                                                                                            | -                                                |
| ICGC_0507_Pa_P_8069060 | no             | 0                | -                                                                                                                            | -                                                |
| ICGC_0518_Pa_P_8069120 | yes            | 1                | -                                                                                                                            | chr12:16384995-42011319 + chr8:42534001-96221000 |
| ICGC_0521_Pa_P_8069443 | yes            | 2                | chr4:131679252-183296000, chr17:21737346-25340558 + chr9:85192726-125508753                                                  | -                                                |
| ICGC_0526_Pa_P_8069453 | yes            | 3                | chr6:11430001-53080081, chr16:4622923-69128190, chr12:77168515-81380773 + chr13:42394145-51286894                            | -                                                |
| ICGC_0533_Pa_P_8070181 | no             | 0                | -                                                                                                                            | -                                                |
| ICGC_0535_Pa_P_8070213 | yes            | 2                | chr18:890528-21111000                                                                                                        | chr12:80584438-121394005                         |
| ICGC_0543_Pa_P_8070199 | yes            | 2                | chr20:15750001-41058204, chr7:94685001-95587605 + chr9:181480-137306520                                                      | -                                                |

ASHPC\_0003\_Pa\_P\_2

ASHPC\_0003\_Pa\_P\_2

|                         | Total Pass: Chromosome(6) | Window ID with >= 8 SV | Window Join | Window AR | Window Oscillation | Window Type | Window Chain                                     | Overall    |
|-------------------------|---------------------------|------------------------|-------------|-----------|--------------------|-------------|--------------------------------------------------|------------|
| chr1                    | 1                         | FAIL                   | NA          | NA        | NA                 | NA          | NA                                               | NA         |
| chr2                    | 1                         | FAIL                   | NA          | NA        | NA                 | NA          | NA                                               | NA         |
| chr3                    | 1                         | FAIL                   | NA          | NA        | NA                 | NA          | NA                                               | NA         |
| chr4                    | 5                         | FAIL                   | NA          | NA        | NA                 | NA          | NA                                               | NA         |
| chr5                    | 1                         | FAIL                   | NA          | NA        | NA                 | NA          | NA                                               | NA         |
| chr6                    | 1                         | FAIL                   | NA          | NA        | NA                 | NA          | NA                                               | NA         |
| chr7                    | 0                         | FAIL                   | NA          | NA        | NA                 | NA          | NA                                               | NA         |
| chr8                    | 0                         | FAIL                   | NA          | NA        | NA                 | NA          | NA                                               | NA         |
| chr9:2858001-26808000   | 5                         | FAIL                   | FAIL        | FAIL      | PASS               | inter       | NA                                               | Event(CR2) |
| chr10                   | 0                         | FAIL                   | NA          | NA        | NA                 | NA          | NA                                               | NA         |
| chr11                   | 0                         | FAIL                   | NA          | NA        | NA                 | NA          | NA                                               | NA         |
| chr12:80911525-61100331 | 4                         | FAIL                   | FAIL        | FAIL      | FAIL               | NA          | NA                                               | NA         |
| chr13                   | 0                         | FAIL                   | NA          | NA        | NA                 | NA          | NA                                               | NA         |
| chr14                   | 0                         | FAIL                   | NA          | NA        | NA                 | NA          | NA                                               | NA         |
| chr15                   | 0                         | FAIL                   | NA          | NA        | NA                 | NA          | NA                                               | NA         |
| chr16                   | 0                         | FAIL                   | NA          | NA        | NA                 | NA          | NA                                               | NA         |
| chr17:27299750-27317398 | 5                         | FAIL                   | FAIL        | FAIL      | FAIL               | NA          | NA                                               | NA         |
| chr17:36126715-48291000 | 5                         | FAIL                   | PASS        | PASS      | FAIL               | chain       | chr17:36126715-48291000, chr20:22654370-41679000 | NA         |
| chr18                   | 0                         | FAIL                   | NA          | NA        | NA                 | NA          | NA                                               | NA         |
| chr19:11480890-21893138 | 0                         | FAIL                   | FAIL        | FAIL      | FAIL               | chain       | chr19:11480890-21893138, chr20:8080720-8554165   | NA         |
| chr20:8080720-8554165   | 4                         | FAIL                   | PASS        | FAIL      | FAIL               | chain       | chr19:11480890-21893138, chr20:8080720-8554165   | NA         |
| chr20:22654370-41679000 | 4                         | FAIL                   | PASS        | FAIL      | FAIL               | chain       | chr17:36126715-48291000, chr20:22654370-41679000 | NA         |
| chr21                   | 0                         | FAIL                   | NA          | NA        | NA                 | NA          | NA                                               | NA         |
| chr22                   | 0                         | FAIL                   | NA          | NA        | NA                 | NA          | NA                                               | NA         |
| chrX                    | 0                         | FAIL                   | NA          | NA        | NA                 | NA          | NA                                               | NA         |
| chrY                    | 0                         | FAIL                   | NA          | NA        | NA                 | NA          | NA                                               | NA         |

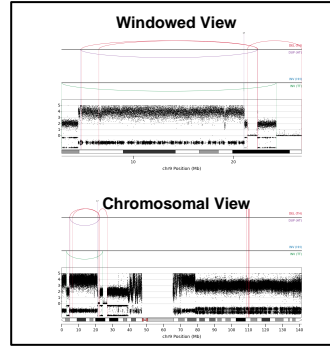

ASHPC\_0005\_Pa\_P\_1

ASHPC\_0005\_Pa\_P\_1

|                         | Total Pass: Chromosome(6) | Window ID with >= 8 SV | Window Join | Window AR | Window Oscillation | Window Type | Window Chain                                    | Overall    |
|-------------------------|---------------------------|------------------------|-------------|-----------|--------------------|-------------|-------------------------------------------------|------------|
| chr1                    | 0                         | FAIL                   | NA          | NA        | NA                 | NA          | NA                                              | NA         |
| chr2                    | 0                         | FAIL                   | NA          | NA        | NA                 | NA          | NA                                              | NA         |
| chr3                    | 0                         | FAIL                   | NA          | NA        | NA                 | NA          | NA                                              | NA         |
| chr4                    | 0                         | FAIL                   | NA          | NA        | NA                 | NA          | NA                                              | NA         |
| chr5                    | 0                         | FAIL                   | NA          | NA        | NA                 | NA          | NA                                              | NA         |
| chr6                    | 0                         | FAIL                   | NA          | NA        | NA                 | NA          | NA                                              | NA         |
| chr7                    | 0                         | FAIL                   | NA          | NA        | NA                 | NA          | NA                                              | NA         |
| chr8                    | 0                         | FAIL                   | NA          | NA        | NA                 | NA          | NA                                              | NA         |
| chr9:2627754-21822941   | 6                         | FAIL                   | FAIL        | FAIL      | FAIL               | NA          | NA                                              | NA         |
| chr9:29098519-29904903  | 6                         | FAIL                   | FAIL        | FAIL      | FAIL               | chain       | chr18:69813001-78009123, chr9:29098519-29904903 | NA         |
| chr10                   | 0                         | FAIL                   | NA          | NA        | NA                 | NA          | NA                                              | NA         |
| chr11                   | 0                         | FAIL                   | NA          | NA        | NA                 | NA          | NA                                              | NA         |
| chr12                   | 0                         | FAIL                   | NA          | NA        | NA                 | NA          | NA                                              | NA         |
| chr13                   | 0                         | FAIL                   | NA          | NA        | NA                 | NA          | NA                                              | NA         |
| chr14                   | 0                         | FAIL                   | NA          | NA        | NA                 | NA          | NA                                              | NA         |
| chr15                   | 0                         | FAIL                   | NA          | NA        | NA                 | NA          | NA                                              | NA         |
| chr16                   | 0                         | FAIL                   | NA          | NA        | NA                 | NA          | NA                                              | NA         |
| chr17:16787919-21320992 | 0                         | FAIL                   | FAIL        | FAIL      | FAIL               | NA          | NA                                              | NA         |
| chr18:8016920-19845886  | 6                         | FAIL                   | FAIL        | FAIL      | FAIL               | NA          | NA                                              | NA         |
| chr18:31950001-68900000 | 6                         | PASS                   | PASS        | PASS      | PASS               | inter       | NA                                              | Event(CR1) |
| chr18:69813001-78009123 | 6                         | FAIL                   | FAIL        | FAIL      | FAIL               | chain       | chr18:69813001-78009123, chr9:29098519-29904903 | NA         |
| chr19                   | 0                         | FAIL                   | NA          | NA        | NA                 | NA          | NA                                              | NA         |
| chr20                   | 0                         | FAIL                   | NA          | NA        | NA                 | NA          | NA                                              | NA         |
| chr21                   | 0                         | FAIL                   | NA          | NA        | NA                 | NA          | NA                                              | NA         |
| chr22:19340885-47240370 | 5                         | PASS                   | PASS        | PASS      | PASS               | inter       | NA                                              | Event(CR1) |
| chrX                    | 0                         | FAIL                   | NA          | NA        | NA                 | NA          | NA                                              | NA         |
| chrY                    | 0                         | FAIL                   | NA          | NA        | NA                 | NA          | NA                                              | NA         |

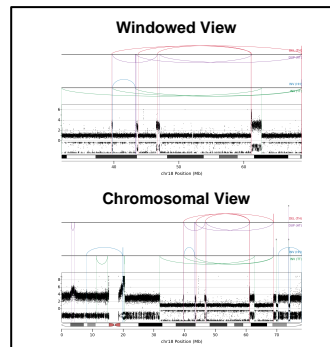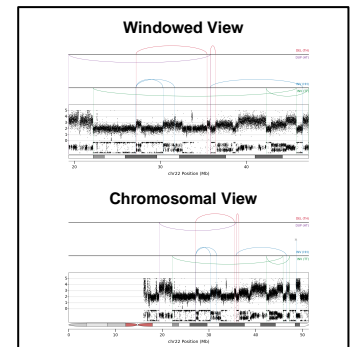

|                           | Total Pass: Chromosome(s) | Window ID with >= 8 SV | Window Join | Window AR | Window Oscillation | Window Type | Window Chain                                     | Overall    |
|---------------------------|---------------------------|------------------------|-------------|-----------|--------------------|-------------|--------------------------------------------------|------------|
| chr1                      | 0                         | FAIL                   | NA          | NA        | NA                 | NA          | NA                                               | NA         |
| chr2                      | 1                         | FAIL                   | NA          | NA        | NA                 | NA          | NA                                               | NA         |
| chr3                      | 3                         | FAIL                   | NA          | NA        | NA                 | NA          | NA                                               | NA         |
| chr4:7963243-28246386     | 6                         | FAIL                   | FAIL        | FAIL      | FAIL               | NA          | NA                                               | NA         |
| chr4:89636001-180440000   | 6                         | PASS                   | FAIL        | PASS      | PASS               | NA          | NA                                               | NA         |
| chr5                      | 1                         | FAIL                   | NA          | NA        | NA                 | NA          | NA                                               | NA         |
| chr6:2111001-50491114     | 6                         | PASS                   | PASS        | PASS      | PASS               | chain       | chr10:114374890-126834137, chr6:2111001-50491114 | Event(CR1) |
| chr7                      | 0                         | FAIL                   | NA          | NA        | NA                 | NA          | NA                                               | NA         |
| chr8                      | 0                         | FAIL                   | NA          | NA        | NA                 | NA          | NA                                               | NA         |
| chr9                      | 0                         | FAIL                   | NA          | NA        | NA                 | NA          | NA                                               | NA         |
| chr10:114374890-126834137 | 5                         | FAIL                   | FAIL        | PASS      | PASS               | chain       | chr10:114374890-126834137, chr6:2111001-50491114 | Event(CR1) |
| chr11                     | 2                         | FAIL                   | NA          | NA        | NA                 | NA          | NA                                               | NA         |
| chr12                     | 0                         | FAIL                   | NA          | NA        | NA                 | NA          | NA                                               | NA         |
| chr13                     | 1                         | FAIL                   | NA          | NA        | NA                 | NA          | NA                                               | NA         |
| chr14                     | 0                         | FAIL                   | NA          | NA        | NA                 | NA          | NA                                               | NA         |
| chr15                     | 0                         | FAIL                   | NA          | NA        | NA                 | NA          | NA                                               | NA         |
| chr16:84266414-85724416   | 3                         | FAIL                   | FAIL        | FAIL      | FAIL               | NA          | NA                                               | NA         |
| chr17                     | 0                         | FAIL                   | NA          | NA        | NA                 | NA          | NA                                               | NA         |
| chr18                     | 0                         | FAIL                   | NA          | NA        | NA                 | NA          | NA                                               | NA         |
| chr19                     | 0                         | FAIL                   | NA          | NA        | NA                 | NA          | NA                                               | NA         |
| chr20                     | 0                         | FAIL                   | NA          | NA        | NA                 | NA          | NA                                               | NA         |
| chr21                     | 0                         | FAIL                   | NA          | NA        | NA                 | NA          | NA                                               | NA         |
| chr22                     | 1                         | FAIL                   | NA          | NA        | NA                 | NA          | NA                                               | NA         |
| chrX                      | 1                         | FAIL                   | NA          | NA        | NA                 | NA          | NA                                               | NA         |
| chrY                      | 0                         | FAIL                   | NA          | NA        | NA                 | NA          | NA                                               | NA         |

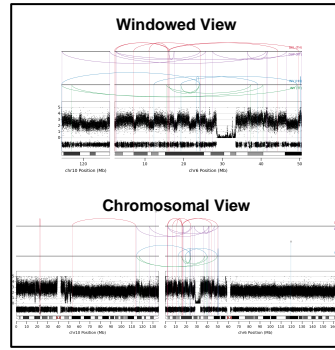

|                           | Total Pass: Chromosome(s) | Window ID with >= 8 SV | Window Join | Window AR | Window Oscillation | Window Type | Window Chain | Overall    |
|---------------------------|---------------------------|------------------------|-------------|-----------|--------------------|-------------|--------------|------------|
| chr1                      | 0                         | FAIL                   | NA          | NA        | NA                 | NA          | NA           | NA         |
| chr2                      | 1                         | FAIL                   | NA          | NA        | NA                 | NA          | NA           | NA         |
| chr3                      | 0                         | FAIL                   | NA          | NA        | NA                 | NA          | NA           | NA         |
| chr4:40688001-189310000   | 4                         | FAIL                   | PASS        | PASS      | PASS               | inter       | NA           | Event(CR2) |
| chr5                      | 2                         | FAIL                   | NA          | NA        | NA                 | NA          | NA           | NA         |
| chr6                      | 0                         | FAIL                   | NA          | NA        | NA                 | NA          | NA           | NA         |
| chr7:5464001-11249295     | 4                         | FAIL                   | FAIL        | FAIL      | FAIL               | NA          | NA           | NA         |
| chr8                      | 0                         | FAIL                   | NA          | NA        | NA                 | NA          | NA           | NA         |
| chr9:19905001-25945117    | 2                         | FAIL                   | FAIL        | FAIL      | FAIL               | NA          | NA           | NA         |
| chr9:26174973-29143000    | 2                         | FAIL                   | FAIL        | FAIL      | FAIL               | NA          | NA           | NA         |
| chr10                     | 0                         | FAIL                   | NA          | NA        | NA                 | NA          | NA           | NA         |
| chr11:118870624-119396074 | 1                         | FAIL                   | FAIL        | FAIL      | FAIL               | NA          | NA           | NA         |
| chr12                     | 0                         | FAIL                   | NA          | NA        | NA                 | NA          | NA           | NA         |
| chr13                     | 0                         | FAIL                   | NA          | NA        | NA                 | NA          | NA           | NA         |
| chr14                     | 0                         | FAIL                   | NA          | NA        | NA                 | NA          | NA           | NA         |
| chr15                     | 0                         | FAIL                   | NA          | NA        | NA                 | NA          | NA           | NA         |
| chr16                     | 0                         | FAIL                   | NA          | NA        | NA                 | NA          | NA           | NA         |
| chr17                     | 0                         | FAIL                   | NA          | NA        | NA                 | NA          | NA           | NA         |
| chr18:5451001-14575136    | 0                         | FAIL                   | FAIL        | FAIL      | FAIL               | NA          | NA           | NA         |
| chr19                     | 0                         | FAIL                   | NA          | NA        | NA                 | NA          | NA           | NA         |
| chr20                     | 0                         | FAIL                   | NA          | NA        | NA                 | NA          | NA           | NA         |
| chr21                     | 0                         | FAIL                   | NA          | NA        | NA                 | NA          | NA           | NA         |
| chr22                     | 1                         | FAIL                   | NA          | NA        | NA                 | NA          | NA           | NA         |
| chrX:121613891-13086896   | 0                         | FAIL                   | FAIL        | FAIL      | FAIL               | NA          | NA           | NA         |
| chrX:134315021-134465374  | 0                         | FAIL                   | FAIL        | FAIL      | FAIL               | NA          | NA           | NA         |
| chrY                      | 0                         | FAIL                   | NA          | NA        | NA                 | NA          | NA           | NA         |

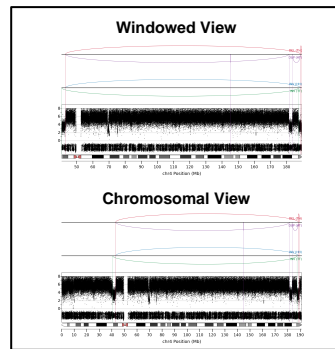

ASHPC\_0008\_Pa\_P

ASHPC\_0008\_Pa\_P

|                          | Total Pass: Chromosome(s) | Window ID with >= 8 SV | Window Join | Window AR | Window Oscillation | Window Type | Window Chain                                                             | Overall    |
|--------------------------|---------------------------|------------------------|-------------|-----------|--------------------|-------------|--------------------------------------------------------------------------|------------|
| chr1                     | 2                         | FAIL                   | NA          | NA        | NA                 | NA          | NA                                                                       | NA         |
| chr2                     | 0                         | FAIL                   | NA          | NA        | NA                 | NA          | NA                                                                       | NA         |
| chr3:61609001-87574000   | 6                         | PASS                   | PASS        | PASS      | PASS               | chain       | chr20:2913001-6118000, chr3:61609001-87574000                            | Event(CR1) |
| chr4                     | 0                         | FAIL                   | NA          | NA        | NA                 | NA          | NA                                                                       | NA         |
| chr5                     | 0                         | FAIL                   | NA          | NA        | NA                 | NA          | NA                                                                       | NA         |
| chr6:40005980-57333811   | 5                         | PASS                   | PASS        | PASS      | FAIL               | chain       | chr14:20953001-101625000, chr18:2451001-12237273, chr6:40005980-57333811 | Event(CR1) |
| chr7                     | 0                         | FAIL                   | NA          | NA        | NA                 | NA          | NA                                                                       | NA         |
| chr8                     | 0                         | FAIL                   | NA          | NA        | NA                 | NA          | NA                                                                       | NA         |
| chr9                     | 3                         | FAIL                   | NA          | NA        | NA                 | NA          | NA                                                                       | NA         |
| chr10                    | 0                         | FAIL                   | NA          | NA        | NA                 | NA          | NA                                                                       | NA         |
| chr11                    | 0                         | FAIL                   | NA          | NA        | NA                 | NA          | NA                                                                       | NA         |
| chr12                    | 1                         | FAIL                   | NA          | NA        | NA                 | NA          | NA                                                                       | NA         |
| chr13                    | 0                         | FAIL                   | NA          | NA        | NA                 | NA          | NA                                                                       | NA         |
| chr14:20953001-101625000 | 6                         | PASS                   | PASS        | PASS      | PASS               | chain       | chr14:20953001-101625000, chr18:2451001-12237273, chr6:40005980-57333811 | Event(CR1) |
| chr15                    | 1                         | FAIL                   | NA          | NA        | NA                 | NA          | NA                                                                       | NA         |
| chr16                    | 0                         | FAIL                   | NA          | NA        | NA                 | NA          | NA                                                                       | NA         |
| chr17                    | 0                         | FAIL                   | NA          | NA        | NA                 | NA          | NA                                                                       | NA         |
| chr18:2451001-12237273   | 6                         | FAIL                   | PASS        | PASS      | FAIL               | chain       | chr14:20953001-101625000, chr18:2451001-12237273, chr6:40005980-57333811 | Event(CR1) |
| chr19                    | 0                         | FAIL                   | NA          | NA        | NA                 | NA          | NA                                                                       | NA         |
| chr20:2913001-6118000    | 1                         | FAIL                   | FAIL        | FAIL      | FAIL               | chain       | chr20:2913001-6118000, chr3:61609001-87574000                            | Event(CR1) |
| chr21:26011547-29983023  | 1                         | FAIL                   | FAIL        | FAIL      | FAIL               | NA          | NA                                                                       | NA         |
| chr22                    | 0                         | FAIL                   | NA          | NA        | NA                 | NA          | NA                                                                       | NA         |
| chrX                     | 0                         | FAIL                   | NA          | NA        | NA                 | NA          | NA                                                                       | NA         |
| chrY                     | 0                         | FAIL                   | NA          | NA        | NA                 | NA          | NA                                                                       | NA         |

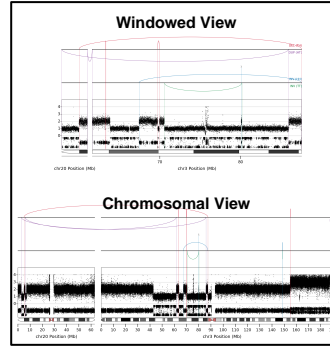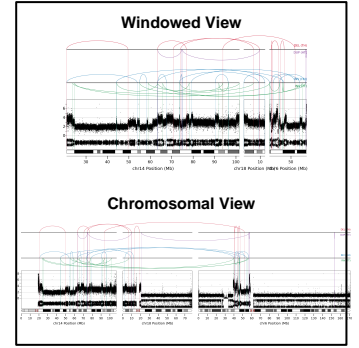

ASHPC\_0009\_Pa\_P

ASHPC\_0009\_Pa\_P

|                          | Total Pass: Chromosome(s) | Window ID with >= 8 SV | Window Join | Window AR | Window Oscillation | Window Type | Window Chain | Overall    |
|--------------------------|---------------------------|------------------------|-------------|-----------|--------------------|-------------|--------------|------------|
| chr1                     | 0                         | FAIL                   | NA          | NA        | NA                 | NA          | NA           | NA         |
| chr2                     | 0                         | FAIL                   | NA          | NA        | NA                 | NA          | NA           | NA         |
| chr3                     | 0                         | FAIL                   | NA          | NA        | NA                 | NA          | NA           | NA         |
| chr4                     | 0                         | FAIL                   | NA          | NA        | NA                 | NA          | NA           | NA         |
| chr5                     | 0                         | FAIL                   | NA          | NA        | NA                 | NA          | NA           | NA         |
| chr6:41803818-53480855   | 5                         | FAIL                   | FAIL        | PASS      | FAIL               | inter       | NA           | NA         |
| chr7                     | 0                         | FAIL                   | NA          | NA        | NA                 | NA          | NA           | NA         |
| chr8                     | 0                         | FAIL                   | NA          | NA        | NA                 | NA          | NA           | NA         |
| chr9                     | 0                         | FAIL                   | NA          | NA        | NA                 | NA          | NA           | NA         |
| chr10                    | 0                         | FAIL                   | NA          | NA        | NA                 | NA          | NA           | NA         |
| chr11                    | 0                         | FAIL                   | NA          | NA        | NA                 | NA          | NA           | NA         |
| chr12                    | 0                         | FAIL                   | NA          | NA        | NA                 | NA          | NA           | NA         |
| chr13                    | 0                         | FAIL                   | NA          | NA        | NA                 | NA          | NA           | NA         |
| chr14:20253865-102381471 | 6                         | PASS                   | PASS        | PASS      | PASS               | inter       | NA           | Event(CR1) |
| chr15:82459322-84717397  | 5                         | FAIL                   | FAIL        | FAIL      | FAIL               | NA          | NA           | NA         |
| chr16                    | 0                         | FAIL                   | NA          | NA        | NA                 | NA          | NA           | NA         |
| chr17                    | 5                         | FAIL                   | NA          | NA        | NA                 | NA          | NA           | NA         |
| chr18                    | 0                         | FAIL                   | NA          | NA        | NA                 | NA          | NA           | NA         |
| chr19                    | 0                         | FAIL                   | NA          | NA        | NA                 | NA          | NA           | NA         |
| chr20                    | 0                         | FAIL                   | NA          | NA        | NA                 | NA          | NA           | NA         |
| chr21                    | 0                         | FAIL                   | NA          | NA        | NA                 | NA          | NA           | NA         |
| chr22                    | 0                         | FAIL                   | NA          | NA        | NA                 | NA          | NA           | NA         |
| chrX                     | 0                         | FAIL                   | NA          | NA        | NA                 | NA          | NA           | NA         |
| chrY                     | 0                         | FAIL                   | NA          | NA        | NA                 | NA          | NA           | NA         |

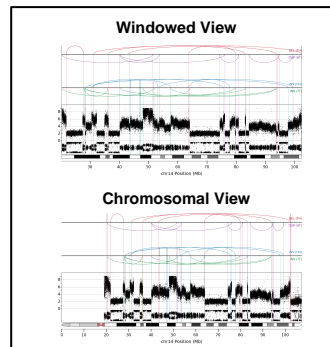

ASHPC\_0010\_Pa\_P

ASHPC\_0010\_Pa\_P

|                         | Total Pass: Chromosome(s) | Window ID with >= 8 SV | Window Join | Window AR | Window Oscillation | Window Type | Window Chain                                     | Overall    |
|-------------------------|---------------------------|------------------------|-------------|-----------|--------------------|-------------|--------------------------------------------------|------------|
| chr1                    | 0                         | FAIL                   | NA          | NA        | NA                 | NA          | NA                                               | NA         |
| chr2                    | 0                         | FAIL                   | NA          | NA        | NA                 | NA          | NA                                               | NA         |
| chr3                    | 0                         | FAIL                   | NA          | NA        | NA                 | NA          | NA                                               | NA         |
| chr4                    | 5                         | FAIL                   | NA          | NA        | NA                 | NA          | NA                                               | NA         |
| chr5                    | 0                         | FAIL                   | NA          | NA        | NA                 | NA          | NA                                               | NA         |
| chr6:89620678-168374137 | 3                         | FAIL                   | FAIL        | FAIL      | FAIL               | chain       | chr22:27232901-46027000, chr6:89620678-168374137 | Event(CR2) |
| chr7                    | 1                         | FAIL                   | NA          | NA        | NA                 | NA          | NA                                               | NA         |
| chr8                    | 2                         | FAIL                   | NA          | NA        | NA                 | NA          | NA                                               | NA         |
| chr9                    | 0                         | FAIL                   | NA          | NA        | NA                 | NA          | NA                                               | NA         |
| chr10                   | 0                         | FAIL                   | NA          | NA        | NA                 | NA          | NA                                               | NA         |
| chr11                   | 1                         | FAIL                   | NA          | NA        | NA                 | NA          | NA                                               | NA         |
| chr12                   | 0                         | FAIL                   | NA          | NA        | NA                 | NA          | NA                                               | NA         |
| chr13                   | 0                         | FAIL                   | NA          | NA        | NA                 | NA          | NA                                               | NA         |
| chr14                   | 0                         | FAIL                   | NA          | NA        | NA                 | NA          | NA                                               | NA         |
| chr15                   | 0                         | FAIL                   | NA          | NA        | NA                 | NA          | NA                                               | NA         |
| chr16                   | 0                         | FAIL                   | NA          | NA        | NA                 | NA          | NA                                               | NA         |
| chr17                   | 0                         | FAIL                   | NA          | NA        | NA                 | NA          | NA                                               | NA         |
| chr18:4121001-73562992  | 3                         | FAIL                   | PASS        | FAIL      | FAIL               | inter       | NA                                               | NA         |
| chr19                   | 0                         | FAIL                   | NA          | NA        | NA                 | NA          | NA                                               | NA         |
| chr20                   | 0                         | FAIL                   | NA          | NA        | NA                 | NA          | NA                                               | NA         |
| chr21                   | 0                         | FAIL                   | NA          | NA        | NA                 | NA          | NA                                               | NA         |
| chr22:27232901-46027000 | 4                         | FAIL                   | FAIL        | PASS      | PASS               | chain       | chr22:27232901-46027000, chr6:89620678-168374137 | Event(CR2) |
| chrX                    | 0                         | FAIL                   | NA          | NA        | NA                 | NA          | NA                                               | NA         |
| chrY                    | 0                         | FAIL                   | NA          | NA        | NA                 | NA          | NA                                               | NA         |

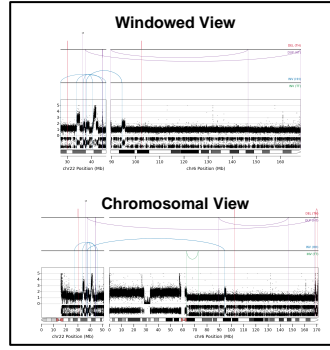

ASHPC\_0016\_Pa\_P

ASHPC\_0016\_Pa\_P

|                         | Total Pass: Chromosome(s) | Window ID with >= 8 SV | Window Join | Window AR | Window Oscillation | Window Type | Window Chain                                    | Overall    |
|-------------------------|---------------------------|------------------------|-------------|-----------|--------------------|-------------|-------------------------------------------------|------------|
| chr1:14759444-31722000  | 2                         | FAIL                   | FAIL        | FAIL      | FAIL               | NA          | NA                                              | NA         |
| chr2                    | 0                         | FAIL                   | NA          | NA        | NA                 | NA          | NA                                              | NA         |
| chr3                    | 0                         | FAIL                   | NA          | NA        | NA                 | NA          | NA                                              | NA         |
| chr4                    | 2                         | FAIL                   | NA          | NA        | NA                 | NA          | NA                                              | NA         |
| chr5                    | 0                         | FAIL                   | NA          | NA        | NA                 | NA          | NA                                              | NA         |
| chr6                    | 2                         | FAIL                   | NA          | NA        | NA                 | NA          | NA                                              | NA         |
| chr7                    | 0                         | FAIL                   | NA          | NA        | NA                 | NA          | NA                                              | NA         |
| chr8:36048001-43191000  | 2                         | FAIL                   | FAIL        | PASS      | FAIL               | chain       | chr20:20185692-20225981, chr8:36048001-43191000 | NA         |
| chr9:35216985-140949599 | 6                         | PASS                   | PASS        | PASS      | PASS               | inter       | NA                                              | Event(CR1) |
| chr10                   | 0                         | FAIL                   | NA          | NA        | NA                 | NA          | NA                                              | NA         |
| chr11                   | 0                         | FAIL                   | NA          | NA        | NA                 | NA          | NA                                              | NA         |
| chr12                   | 0                         | FAIL                   | NA          | NA        | NA                 | NA          | NA                                              | NA         |
| chr13:22553635-46181129 | 6                         | PASS                   | PASS        | PASS      | PASS               | inter       | NA                                              | Event(CR1) |
| chr13:8434001-96923988  | 6                         | FAIL                   | FAIL        | FAIL      | FAIL               | inter       | NA                                              | NA         |
| chr14                   | 0                         | FAIL                   | NA          | NA        | NA                 | NA          | NA                                              | NA         |
| chr15                   | 0                         | FAIL                   | NA          | NA        | NA                 | NA          | NA                                              | NA         |
| chr16                   | 0                         | FAIL                   | NA          | NA        | NA                 | NA          | NA                                              | NA         |
| chr17                   | 0                         | FAIL                   | NA          | NA        | NA                 | NA          | NA                                              | NA         |
| chr18                   | 0                         | FAIL                   | NA          | NA        | NA                 | NA          | NA                                              | NA         |
| chr19                   | 0                         | FAIL                   | NA          | NA        | NA                 | NA          | NA                                              | NA         |
| chr20:20185692-20225981 | 0                         | FAIL                   | FAIL        | FAIL      | FAIL               | chain       | chr20:20185692-20225981, chr8:36048001-43191000 | NA         |
| chr21                   | 0                         | FAIL                   | NA          | NA        | NA                 | NA          | NA                                              | NA         |
| chr22                   | 0                         | FAIL                   | NA          | NA        | NA                 | NA          | NA                                              | NA         |
| chrX                    | 0                         | FAIL                   | NA          | NA        | NA                 | NA          | NA                                              | NA         |
| chrY                    | 0                         | FAIL                   | NA          | NA        | NA                 | NA          | NA                                              | NA         |

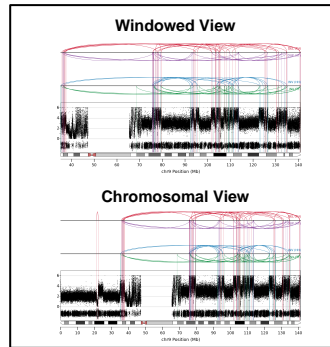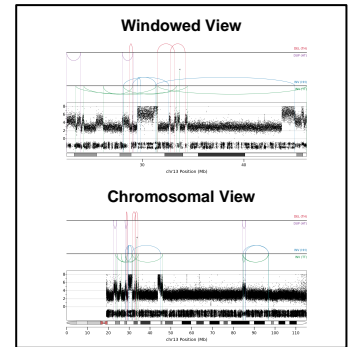

# ASHPC\_0017\_Pa\_P

# ASHPC\_0017\_Pa\_P

|                         | Total Pass: Chromosome(s) | Window ID with >= 8 SV | Window Join | Window AR | Window Oscillation | Window Type | Window Chain                                     | Overall    |
|-------------------------|---------------------------|------------------------|-------------|-----------|--------------------|-------------|--------------------------------------------------|------------|
| chr1                    | 0                         | FAIL                   | NA          | NA        | NA                 | NA          | NA                                               | NA         |
| chr2                    | 0                         | FAIL                   | NA          | NA        | NA                 | NA          | NA                                               | NA         |
| chr3                    | 0                         | FAIL                   | NA          | NA        | NA                 | NA          | NA                                               | NA         |
| chr4                    | 0                         | FAIL                   | NA          | NA        | NA                 | NA          | NA                                               | NA         |
| chr5                    | 0                         | FAIL                   | NA          | NA        | NA                 | NA          | NA                                               | NA         |
| chr6                    | 0                         | FAIL                   | NA          | NA        | NA                 | NA          | NA                                               | NA         |
| chr7                    | 0                         | FAIL                   | NA          | NA        | NA                 | NA          | NA                                               | NA         |
| chr8                    | 0                         | FAIL                   | NA          | NA        | NA                 | NA          | NA                                               | NA         |
| chr9                    | 1                         | FAIL                   | NA          | NA        | NA                 | NA          | NA                                               | NA         |
| chr10                   | 0                         | FAIL                   | NA          | NA        | NA                 | NA          | NA                                               | NA         |
| chr11                   | 0                         | FAIL                   | NA          | NA        | NA                 | NA          | NA                                               | NA         |
| chr12:1002500-75488000  | 6                         | PASS                   | PASS        | PASS      | PASS               | inter       | NA                                               | Event(CR1) |
| chr13                   | 0                         | FAIL                   | NA          | NA        | NA                 | NA          | NA                                               | NA         |
| chr14                   | 0                         | FAIL                   | NA          | NA        | NA                 | NA          | NA                                               | NA         |
| chr15                   | 0                         | FAIL                   | NA          | NA        | NA                 | NA          | NA                                               | NA         |
| chr16                   | 0                         | FAIL                   | NA          | NA        | NA                 | NA          | NA                                               | NA         |
| chr17:25361904-70203528 | 5                         | PASS                   | PASS        | PASS      | FAIL               | chain       | chr17:25361904-70203528, chr18:72561937-72701616 | Event(CR1) |
| chr18:21073333-21085337 | 1                         | FAIL                   | FAIL        | FAIL      | FAIL               | chain       | chr18:21073333-21085337, chr20:47937001-59966136 | NA         |
| chr18:72561937-72701616 | 1                         | FAIL                   | FAIL        | FAIL      | FAIL               | chain       | chr17:25361904-70203528, chr18:72561937-72701616 | Event(CR1) |
| chr19                   | 0                         | FAIL                   | NA          | NA        | NA                 | NA          | NA                                               | NA         |
| chr20:47937001-59966136 | 0                         | FAIL                   | FAIL        | FAIL      | FAIL               | chain       | chr18:21073333-21085337, chr20:47937001-59966136 | NA         |
| chr21                   | 0                         | FAIL                   | NA          | NA        | NA                 | NA          | NA                                               | NA         |
| chr22                   | 0                         | FAIL                   | NA          | NA        | NA                 | NA          | NA                                               | NA         |
| chrX                    | 0                         | FAIL                   | NA          | NA        | NA                 | NA          | NA                                               | NA         |
| chrY                    | 0                         | FAIL                   | NA          | NA        | NA                 | NA          | NA                                               | NA         |

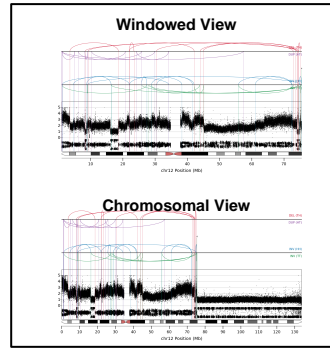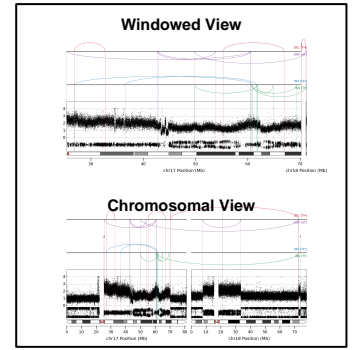

# ASHPC\_0022\_Pa\_P

# ASHPC\_0022\_Pa\_P

|                          | Total Pass: Chromosome(s) | Window ID with >= 8 SV | Window Join | Window AR | Window Oscillation | Window Type | Window Chain | Overall    |
|--------------------------|---------------------------|------------------------|-------------|-----------|--------------------|-------------|--------------|------------|
| chr1                     | 0                         | FAIL                   | NA          | NA        | NA                 | NA          | NA           | NA         |
| chr2                     | 0                         | FAIL                   | NA          | NA        | NA                 | NA          | NA           | NA         |
| chr3:184841589-185313600 | 0                         | FAIL                   | FAIL        | FAIL      | FAIL               | NA          | NA           | NA         |
| chr4                     | 1                         | FAIL                   | NA          | NA        | NA                 | NA          | NA           | NA         |
| chr5                     | 0                         | FAIL                   | NA          | NA        | NA                 | NA          | NA           | NA         |
| chr6                     | 0                         | FAIL                   | NA          | NA        | NA                 | NA          | NA           | NA         |
| chr7                     | 0                         | FAIL                   | NA          | NA        | NA                 | NA          | NA           | NA         |
| chr8                     | 0                         | FAIL                   | NA          | NA        | NA                 | NA          | NA           | NA         |
| chr9                     | 5                         | FAIL                   | NA          | NA        | NA                 | NA          | NA           | NA         |
| chr10                    | 0                         | FAIL                   | NA          | NA        | NA                 | NA          | NA           | NA         |
| chr11                    | 0                         | FAIL                   | NA          | NA        | NA                 | NA          | NA           | NA         |
| chr12                    | 0                         | FAIL                   | NA          | NA        | NA                 | NA          | NA           | NA         |
| chr13                    | 0                         | FAIL                   | NA          | NA        | NA                 | NA          | NA           | NA         |
| chr14                    | 0                         | FAIL                   | NA          | NA        | NA                 | NA          | NA           | NA         |
| chr15                    | 0                         | FAIL                   | NA          | NA        | NA                 | NA          | NA           | NA         |
| chr16                    | 0                         | FAIL                   | NA          | NA        | NA                 | NA          | NA           | NA         |
| chr17                    | 1                         | FAIL                   | NA          | NA        | NA                 | NA          | NA           | NA         |
| chr18                    | 1                         | FAIL                   | NA          | NA        | NA                 | NA          | NA           | NA         |
| chr19:34861316-4789217   | 5                         | PASS                   | PASS        | PASS      | FAIL               | inter       | NA           | Event(CR1) |
| chr20                    | 0                         | FAIL                   | NA          | NA        | NA                 | NA          | NA           | NA         |
| chr21                    | 0                         | FAIL                   | NA          | NA        | NA                 | NA          | NA           | NA         |
| chr22                    | 0                         | FAIL                   | NA          | NA        | NA                 | NA          | NA           | NA         |
| chrX:9528067-137731801   | 2                         | FAIL                   | PASS        | FAIL      | FAIL               | inter       | NA           | NA         |
| chrY                     | 0                         | FAIL                   | NA          | NA        | NA                 | NA          | NA           | NA         |

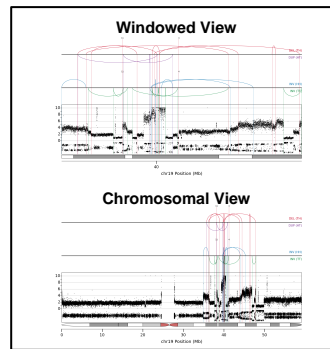



|                         | Total Pass: Chromosome(s) | Window ID with >= 8 SV | Window Join | Window AR | Window Oscillation | Window Type | Window Chain | Overall    |
|-------------------------|---------------------------|------------------------|-------------|-----------|--------------------|-------------|--------------|------------|
| chr1                    | 1                         | FAIL                   | NA          | NA        | NA                 | NA          | NA           | NA         |
| chr2                    | 1                         | FAIL                   | NA          | NA        | NA                 | NA          | NA           | NA         |
| chr3                    | 0                         | FAIL                   | NA          | NA        | NA                 | NA          | NA           | NA         |
| chr4                    | 1                         | FAIL                   | NA          | NA        | NA                 | NA          | NA           | NA         |
| chr5                    | 0                         | FAIL                   | NA          | NA        | NA                 | NA          | NA           | NA         |
| chr12:0211595-120481595 | 2                         | FAIL                   | PASS        | FAIL      | FAIL               | NA          | NA           | NA         |
| chr7                    | 1                         | FAIL                   | NA          | NA        | NA                 | NA          | NA           | NA         |
| chr8                    | 1                         | FAIL                   | NA          | NA        | NA                 | NA          | NA           | NA         |
| chr9                    | 0                         | FAIL                   | NA          | NA        | NA                 | NA          | NA           | NA         |
| chr10                   | 1                         | FAIL                   | NA          | NA        | NA                 | NA          | NA           | NA         |
| chr11                   | 0                         | FAIL                   | NA          | NA        | NA                 | NA          | NA           | NA         |
| chr12:31001001-32959000 | 2                         | FAIL                   | FAIL        | FAIL      | FAIL               | NA          | NA           | NA         |
| chr13                   | 0                         | FAIL                   | NA          | NA        | NA                 | NA          | NA           | NA         |
| chr14                   | 2                         | FAIL                   | NA          | NA        | NA                 | NA          | NA           | NA         |
| chr15                   | 0                         | FAIL                   | NA          | NA        | NA                 | NA          | NA           | NA         |
| chr16                   | 0                         | FAIL                   | NA          | NA        | NA                 | NA          | NA           | NA         |
| chr17:26315719-77395420 | 5                         | PASS                   | PASS        | PASS      | PASS               | inter       | NA           | Event(CR1) |
| chr18                   | 0                         | FAIL                   | NA          | NA        | NA                 | NA          | NA           | NA         |
| chr19                   | 0                         | FAIL                   | NA          | NA        | NA                 | NA          | NA           | NA         |
| chr20                   | 0                         | FAIL                   | NA          | NA        | NA                 | NA          | NA           | NA         |
| chr21                   | 0                         | FAIL                   | NA          | NA        | NA                 | NA          | NA           | NA         |
| chr22                   | 0                         | FAIL                   | NA          | NA        | NA                 | NA          | NA           | NA         |
| chrX                    | 1                         | FAIL                   | NA          | NA        | NA                 | NA          | NA           | NA         |
| chrY                    | 0                         | FAIL                   | NA          | NA        | NA                 | NA          | NA           | NA         |

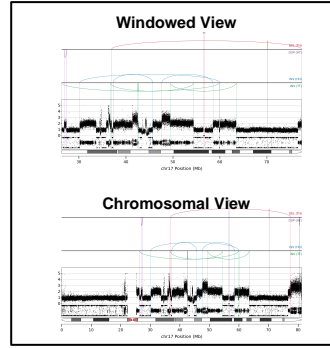

|                         | Total Pass: Chromosome(s) | Window ID with >= 8 SV | Window Join | Window AR | Window Oscillation | Window Type | Window Chain                                     | Overall    |
|-------------------------|---------------------------|------------------------|-------------|-----------|--------------------|-------------|--------------------------------------------------|------------|
| chr1                    | 1                         | FAIL                   | NA          | NA        | NA                 | NA          | NA                                               | NA         |
| chr2                    | 0                         | FAIL                   | NA          | NA        | NA                 | NA          | NA                                               | NA         |
| chr3:9782837-85004366   | 4                         | FAIL                   | FAIL        | FAIL      | FAIL               | NA          | NA                                               | NA         |
| chr4                    | 3                         | FAIL                   | NA          | NA        | NA                 | NA          | NA                                               | NA         |
| chr5                    | 0                         | FAIL                   | NA          | NA        | NA                 | NA          | NA                                               | NA         |
| chr6                    | 1                         | FAIL                   | NA          | NA        | NA                 | NA          | NA                                               | NA         |
| chr7:1993736-24244676   | 3                         | FAIL                   | FAIL        | FAIL      | FAIL               | inter       | NA                                               | NA         |
| chr8                    | 0                         | FAIL                   | NA          | NA        | NA                 | NA          | NA                                               | NA         |
| chr9                    | 1                         | FAIL                   | NA          | NA        | NA                 | NA          | NA                                               | NA         |
| chr10:50401001-52139100 | 3                         | FAIL                   | FAIL        | FAIL      | FAIL               | NA          | NA                                               | NA         |
| chr11                   | 0                         | FAIL                   | NA          | NA        | NA                 | NA          | NA                                               | NA         |
| chr12                   | 1                         | FAIL                   | NA          | NA        | NA                 | NA          | NA                                               | NA         |
| chr13                   | 1                         | FAIL                   | NA          | NA        | NA                 | NA          | NA                                               | NA         |
| chr14                   | 0                         | FAIL                   | NA          | NA        | NA                 | NA          | NA                                               | NA         |
| chr15                   | 0                         | FAIL                   | NA          | NA        | NA                 | NA          | NA                                               | NA         |
| chr16                   | 0                         | FAIL                   | NA          | NA        | NA                 | NA          | NA                                               | NA         |
| chr17:20767312-50004922 | 0                         | FAIL                   | FAIL        | FAIL      | FAIL               | chain       | chr17:20767312-50004922, chr18:52273997-66884000 | Event(CR1) |
| chr18:2705001-49888000  | 6                         | FAIL                   | FAIL        | PASS      | PASS               | NA          | NA                                               | NA         |
| chr18:52273997-66884000 | 6                         | PASS                   | PASS        | PASS      | PASS               | chain       | chr17:20767312-50004922, chr18:52273997-66884000 | Event(CR1) |
| chr19                   | 0                         | FAIL                   | NA          | NA        | NA                 | NA          | NA                                               | NA         |
| chr20                   | 0                         | FAIL                   | NA          | NA        | NA                 | NA          | NA                                               | NA         |
| chr21                   | 0                         | FAIL                   | NA          | NA        | NA                 | NA          | NA                                               | NA         |
| chr22                   | 0                         | FAIL                   | NA          | NA        | NA                 | NA          | NA                                               | NA         |
| chrX                    | 0                         | FAIL                   | NA          | NA        | NA                 | NA          | NA                                               | NA         |
| chrY                    | 0                         | FAIL                   | NA          | NA        | NA                 | NA          | NA                                               | NA         |

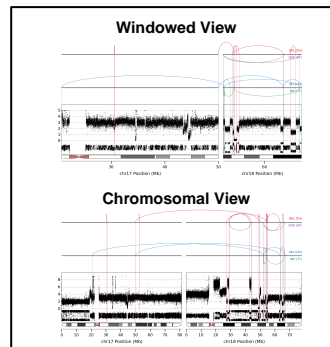

ASHPC\_0027\_Pa\_P

ASHPC\_0027\_Pa\_P

|                          | Total Pass: Chromosome(s) | Window ID with >= 8 SV | Window Join | Window AR | Window Oscillation | Window Type | Window Chain | Overall    |
|--------------------------|---------------------------|------------------------|-------------|-----------|--------------------|-------------|--------------|------------|
| chr1                     | 0                         | FAIL                   | NA          | NA        | NA                 | NA          | NA           | NA         |
| chr2                     | 0                         | FAIL                   | NA          | NA        | NA                 | NA          | NA           | NA         |
| chr3                     | 1                         | FAIL                   | NA          | NA        | NA                 | NA          | NA           | NA         |
| chr4                     | 0                         | FAIL                   | NA          | NA        | NA                 | NA          | NA           | NA         |
| chr5                     | 0                         | FAIL                   | NA          | NA        | NA                 | NA          | NA           | NA         |
| chr6:8838001-69083000    | 6                         | PASS                   | PASS        | PASS      | PASS               | inter       | NA           | Event(CR1) |
| chr7                     | 0                         | FAIL                   | NA          | NA        | NA                 | NA          | NA           | NA         |
| chr8:95993001-135627433  | 6                         | PASS                   | PASS        | PASS      | PASS               | inter       | NA           | Event(CR1) |
| chr9                     | 2                         | FAIL                   | NA          | NA        | NA                 | NA          | NA           | NA         |
| chr10                    | 0                         | FAIL                   | NA          | NA        | NA                 | NA          | NA           | NA         |
| chr11                    | 0                         | FAIL                   | NA          | NA        | NA                 | NA          | NA           | NA         |
| chr12:14783594-124335905 | 5                         | PASS                   | PASS        | PASS      | PASS               | inter       | NA           | Event(CR1) |
| chr13                    | 0                         | FAIL                   | NA          | NA        | NA                 | NA          | NA           | NA         |
| chr14                    | 0                         | FAIL                   | NA          | NA        | NA                 | NA          | NA           | NA         |
| chr15                    | 0                         | FAIL                   | NA          | NA        | NA                 | NA          | NA           | NA         |
| chr16                    | 0                         | FAIL                   | NA          | NA        | NA                 | NA          | NA           | NA         |
| chr17                    | 1                         | FAIL                   | NA          | NA        | NA                 | NA          | NA           | NA         |
| chr18:2114001-25595735   | 6                         | PASS                   | PASS        | PASS      | PASS               | inter       | NA           | Event(CR1) |
| chr19                    | 0                         | FAIL                   | NA          | NA        | NA                 | NA          | NA           | NA         |
| chr20                    | 0                         | FAIL                   | NA          | NA        | NA                 | NA          | NA           | NA         |
| chr21                    | 0                         | FAIL                   | NA          | NA        | NA                 | NA          | NA           | NA         |
| chr22                    | 0                         | FAIL                   | NA          | NA        | NA                 | NA          | NA           | NA         |
| chrX                     | 0                         | FAIL                   | NA          | NA        | NA                 | NA          | NA           | NA         |
| chrY                     | 0                         | FAIL                   | NA          | NA        | NA                 | NA          | NA           | NA         |

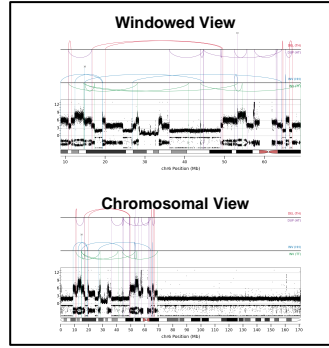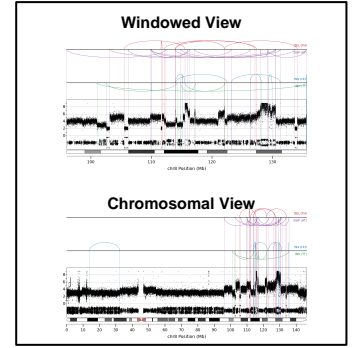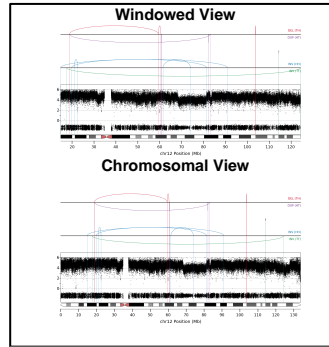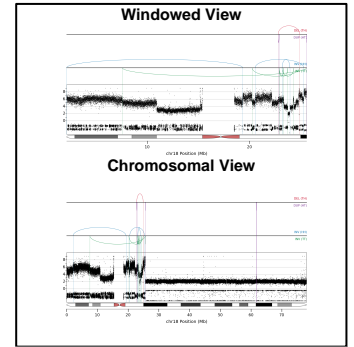

PCSI\_0015\_Pa\_P\_526

PCSI\_0015\_Pa\_P\_526

|                          | Total Pass: Chromosome(s) | Window ID with >= 8 SV | Window Join | Window AR | Window Oscillation | Window Type | Window Chain                                                                                                                 | Overall    |
|--------------------------|---------------------------|------------------------|-------------|-----------|--------------------|-------------|------------------------------------------------------------------------------------------------------------------------------|------------|
| chr1                     | 4                         | FAIL                   | NA          | NA        | NA                 | NA          | NA                                                                                                                           | NA         |
| chr2                     | 4                         | FAIL                   | NA          | NA        | NA                 | NA          | NA                                                                                                                           | NA         |
| chr3:14781852-184045445  | 3                         | FAIL                   | FAIL        | FAIL      | FAIL               | NA          | NA                                                                                                                           | NA         |
| chr4:10887125-58346424   | 5                         | PASS                   | PASS        | PASS      | FAIL               | inter       | NA                                                                                                                           | Event(CR1) |
| chr4:126720001-167337152 | 5                         | FAIL                   | FAIL        | PASS      | FAIL               | NA          | NA                                                                                                                           | NA         |
| chr5                     | 3                         | FAIL                   | NA          | NA        | NA                 | NA          | NA                                                                                                                           | NA         |
| chr6                     | 3                         | FAIL                   | NA          | NA        | NA                 | NA          | NA                                                                                                                           | NA         |
| chr7:16202363-145704711  | 5                         | PASS                   | FAIL        | PASS      | PASS               | chain       | chr10:43756294-49739037, chr12:1756415-132638651, chr21:18184001-32820000, chr7:16202363-145704711, chr8:100543001-143454000 | Event(CR1) |
| chr7:158488001-158938016 | 5                         | FAIL                   | FAIL        | FAIL      | FAIL               | NA          | NA                                                                                                                           | NA         |
| chr8:100543001-143454000 | 5                         | PASS                   | PASS        | PASS      | PASS               | chain       | chr10:43756294-49739037, chr12:1756415-132638651, chr21:18184001-32820000, chr7:16202363-145704711, chr8:100543001-143454000 | Event(CR1) |
| chr9                     | 1                         | FAIL                   | NA          | NA        | NA                 | NA          | NA                                                                                                                           | NA         |
| chr10:43756294-49739037  | 2                         | FAIL                   | FAIL        | FAIL      | FAIL               | chain       | chr10:43756294-49739037, chr12:1756415-132638651, chr21:18184001-32820000, chr7:16202363-145704711, chr8:100543001-143454000 | Event(CR1) |
| chr10:72533335-83774753  | 2                         | FAIL                   | FAIL        | FAIL      | FAIL               | NA          | NA                                                                                                                           | NA         |
| chr11                    | 4                         | FAIL                   | NA          | NA        | NA                 | NA          | NA                                                                                                                           | NA         |
| chr12:1756415-132638651  | 5                         | PASS                   | FAIL        | PASS      | PASS               | chain       | chr10:43756294-49739037, chr12:1756415-132638651, chr21:18184001-32820000, chr7:16202363-145704711, chr8:100543001-143454000 | Event(CR1) |
| chr13                    | 3                         | FAIL                   | NA          | NA        | NA                 | NA          | NA                                                                                                                           | NA         |
| chr14                    | 2                         | FAIL                   | NA          | NA        | NA                 | NA          | NA                                                                                                                           | NA         |
| chr15                    | 3                         | FAIL                   | NA          | NA        | NA                 | NA          | NA                                                                                                                           | NA         |
| chr16:12049001-62561271  | 2                         | FAIL                   | PASS        | FAIL      | FAIL               | NA          | NA                                                                                                                           | NA         |
| chr17:41282439-41275447  | 2                         | FAIL                   | FAIL        | FAIL      | FAIL               | NA          | NA                                                                                                                           | NA         |
| chr17:57910039-58382562  | 2                         | FAIL                   | FAIL        | FAIL      | FAIL               | inter       | NA                                                                                                                           | NA         |
| chr18:745559-43072000    | 5                         | PASS                   | PASS        | PASS      | FAIL               | inter       | NA                                                                                                                           | Event(CR1) |
| chr19:43521001-48948000  | 3                         | FAIL                   | FAIL        | FAIL      | FAIL               | NA          | NA                                                                                                                           | NA         |
| chr20                    | 5                         | FAIL                   | NA          | NA        | NA                 | NA          | NA                                                                                                                           | NA         |
| chr21:18184001-32820000  | 4                         | FAIL                   | PASS        | PASS      | FAIL               | chain       | chr10:43756294-49739037, chr12:1756415-132638651, chr21:18184001-32820000, chr7:16202363-145704711, chr8:100543001-143454000 | Event(CR1) |
| chr22                    | 2                         | FAIL                   | NA          | NA        | NA                 | NA          | NA                                                                                                                           | NA         |
| chrX:154198126-154055533 | 1                         | FAIL                   | FAIL        | FAIL      | FAIL               | NA          | NA                                                                                                                           | NA         |
| chrY                     | 0                         | FAIL                   | NA          | NA        | NA                 | NA          | NA                                                                                                                           | NA         |

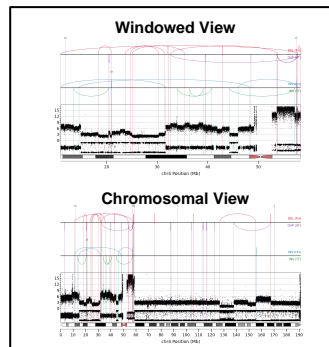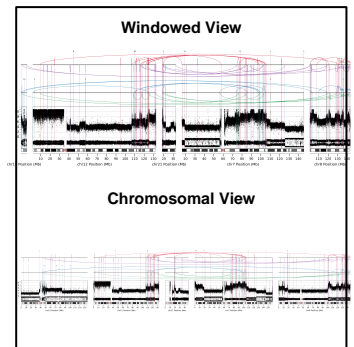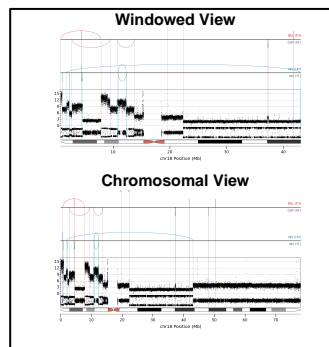

|                         | Total Pass: Chromosome(s) | Window ID with >= 8 SV | Window Join | Window AR | Window Oscillation | Window Type | Window Chain                                     | Overall    |
|-------------------------|---------------------------|------------------------|-------------|-----------|--------------------|-------------|--------------------------------------------------|------------|
| chr1                    | 0                         | FAIL                   | NA          | NA        | NA                 | NA          | NA                                               | NA         |
| chr2                    | 0                         | FAIL                   | NA          | NA        | NA                 | NA          | NA                                               | NA         |
| chr3                    | 0                         | FAIL                   | NA          | NA        | NA                 | NA          | NA                                               | NA         |
| chr4                    | 0                         | FAIL                   | NA          | NA        | NA                 | NA          | NA                                               | NA         |
| chr5                    | 0                         | FAIL                   | NA          | NA        | NA                 | NA          | NA                                               | NA         |
| chr6:890641-88031073    | 5                         | PASS                   | PASS        | PASS      | FAIL               | NA          | NA                                               | NA         |
| chr7                    | 0                         | FAIL                   | NA          | NA        | NA                 | NA          | NA                                               | NA         |
| chr8:1611741-120926101  | 3                         | FAIL                   | FAIL        | PASS      | FAIL               | inter       | NA                                               | NA         |
| chr9                    | 2                         | FAIL                   | NA          | NA        | NA                 | NA          | NA                                               | NA         |
| chr10                   | 0                         | FAIL                   | NA          | NA        | NA                 | NA          | NA                                               | NA         |
| chr11                   | 0                         | FAIL                   | NA          | NA        | NA                 | NA          | NA                                               | NA         |
| chr12:46842760-65974409 | 6                         | PASS                   | PASS        | PASS      | FAIL               | chain       | chr12:46842760-65974409, chr18:39585517-54213000 | Event(CR1) |
| chr12:83504072-88612346 | 6                         | FAIL                   | FAIL        | FAIL      | PASS               | NA          | NA                                               | NA         |
| chr13                   | 0                         | FAIL                   | NA          | NA        | NA                 | NA          | NA                                               | NA         |
| chr14                   | 0                         | FAIL                   | NA          | NA        | NA                 | NA          | NA                                               | NA         |
| chr15                   | 0                         | FAIL                   | NA          | NA        | NA                 | NA          | NA                                               | NA         |
| chr16                   | 0                         | FAIL                   | NA          | NA        | NA                 | NA          | NA                                               | NA         |
| chr17                   | 0                         | FAIL                   | NA          | NA        | NA                 | NA          | NA                                               | NA         |
| chr18:39585517-54213000 | 5                         | PASS                   | PASS        | PASS      | FAIL               | chain       | chr12:46842760-65974409, chr18:39585517-54213000 | Event(CR1) |
| chr19                   | 0                         | FAIL                   | NA          | NA        | NA                 | NA          | NA                                               | NA         |
| chr20                   | 0                         | FAIL                   | NA          | NA        | NA                 | NA          | NA                                               | NA         |
| chr21                   | 0                         | FAIL                   | NA          | NA        | NA                 | NA          | NA                                               | NA         |
| chr22                   | 0                         | FAIL                   | NA          | NA        | NA                 | NA          | NA                                               | NA         |
| chrX                    | 0                         | FAIL                   | NA          | NA        | NA                 | NA          | NA                                               | NA         |
| chrY                    | 0                         | FAIL                   | NA          | NA        | NA                 | NA          | NA                                               | NA         |

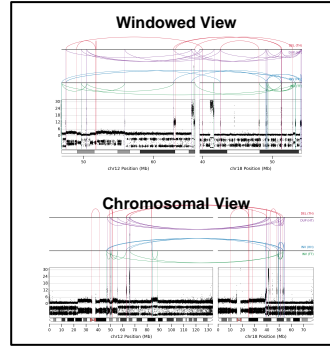

|                          | Total Pass: Chromosome(s) | Window ID with >= 8 SV | Window Join | Window AR | Window Oscillation | Window Type | Window Chain | Overall    |
|--------------------------|---------------------------|------------------------|-------------|-----------|--------------------|-------------|--------------|------------|
| chr1                     | 0                         | FAIL                   | NA          | NA        | NA                 | NA          | NA           | NA         |
| chr2:35940001-46192000   | 4                         | FAIL                   | FAIL        | FAIL      | PASS               | NA          | NA           | NA         |
| chr2:233584806-233997267 | 4                         | FAIL                   | FAIL        | FAIL      | FAIL               | NA          | NA           | NA         |
| chr3                     | 2                         | FAIL                   | NA          | NA        | NA                 | NA          | NA           | NA         |
| chr4:38366-4371687       | 6                         | FAIL                   | FAIL        | FAIL      | FAIL               | NA          | NA           | NA         |
| chr4:5558001-8275056     | 6                         | FAIL                   | FAIL        | FAIL      | FAIL               | NA          | NA           | NA         |
| chr4:121062400-135810076 | 6                         | FAIL                   | FAIL        | FAIL      | FAIL               | NA          | NA           | NA         |
| chr5                     | 0                         | FAIL                   | NA          | NA        | NA                 | NA          | NA           | NA         |
| chr6:108190601-116861507 | 5                         | FAIL                   | FAIL        | FAIL      | FAIL               | NA          | NA           | NA         |
| chr7                     | 0                         | FAIL                   | NA          | NA        | NA                 | NA          | NA           | NA         |
| chr8                     | 0                         | FAIL                   | NA          | NA        | NA                 | NA          | NA           | NA         |
| chr9                     | 0                         | FAIL                   | NA          | NA        | NA                 | NA          | NA           | NA         |
| chr10                    | 2                         | FAIL                   | NA          | NA        | NA                 | NA          | NA           | NA         |
| chr11:10000001-20484000  | 1                         | FAIL                   | FAIL        | FAIL      | FAIL               | NA          | NA           | NA         |
| chr12                    | 0                         | FAIL                   | NA          | NA        | NA                 | NA          | NA           | NA         |
| chr13                    | 0                         | FAIL                   | NA          | NA        | NA                 | NA          | NA           | NA         |
| chr14                    | 0                         | FAIL                   | NA          | NA        | NA                 | NA          | NA           | NA         |
| chr15                    | 0                         | FAIL                   | NA          | NA        | NA                 | NA          | NA           | NA         |
| chr16                    | 0                         | FAIL                   | NA          | NA        | NA                 | NA          | NA           | NA         |
| chr17                    | 0                         | FAIL                   | NA          | NA        | NA                 | NA          | NA           | NA         |
| chr18:3854803-37442167   | 5                         | PASS                   | PASS        | PASS      | FAIL               | inter       | NA           | Event(CR1) |
| chr19                    | 0                         | FAIL                   | NA          | NA        | NA                 | NA          | NA           | NA         |
| chr20                    | 0                         | FAIL                   | NA          | NA        | NA                 | NA          | NA           | NA         |
| chr21                    | 0                         | FAIL                   | NA          | NA        | NA                 | NA          | NA           | NA         |
| chr22                    | 0                         | FAIL                   | NA          | NA        | NA                 | NA          | NA           | NA         |
| chrX                     | 0                         | FAIL                   | NA          | NA        | NA                 | NA          | NA           | NA         |
| chrY                     | 0                         | FAIL                   | NA          | NA        | NA                 | NA          | NA           | NA         |

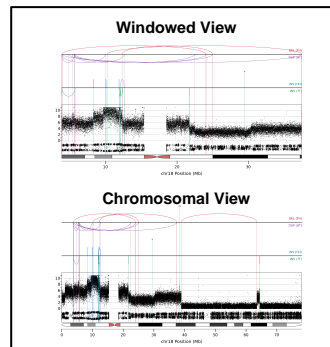

|                          | Total Pass:<br>Chromosome(s) | Window ID<br>with >= 8 SV | Window<br>Join | Window<br>AR | Window<br>Oscillation | Window<br>Type | Window<br>Chain | Overall    |
|--------------------------|------------------------------|---------------------------|----------------|--------------|-----------------------|----------------|-----------------|------------|
| chr1                     | 0                            | FAIL                      | NA             | NA           | NA                    | NA             | NA              | NA         |
| chr2                     | 0                            | FAIL                      | NA             | NA           | NA                    | NA             | NA              | NA         |
| chr3:159437814-190405423 | 1                            | FAIL                      | PASS           | FAIL         | FAIL                  | NA             | NA              | NA         |
| chr4                     | 2                            | FAIL                      | NA             | NA           | NA                    | NA             | NA              | NA         |
| chr5                     | 0                            | FAIL                      | NA             | NA           | NA                    | NA             | NA              | NA         |
| chr6                     | 0                            | FAIL                      | NA             | NA           | NA                    | NA             | NA              | NA         |
| chr7                     | 0                            | FAIL                      | NA             | NA           | NA                    | NA             | NA              | NA         |
| chr8                     | 5                            | FAIL                      | NA             | NA           | NA                    | NA             | NA              | NA         |
| chr9:32804603-37179322   | 5                            | PASS                      | PASS           | PASS         | FAIL                  | inter          | NA              | Event(CR1) |
| chr10                    | 0                            | FAIL                      | NA             | NA           | NA                    | NA             | NA              | NA         |
| chr11                    | 0                            | FAIL                      | NA             | NA           | NA                    | NA             | NA              | NA         |
| chr12                    | 0                            | FAIL                      | NA             | NA           | NA                    | NA             | NA              | NA         |
| chr13                    | 0                            | FAIL                      | NA             | NA           | NA                    | NA             | NA              | NA         |
| chr14                    | 0                            | FAIL                      | NA             | NA           | NA                    | NA             | NA              | NA         |
| chr15                    | 0                            | FAIL                      | NA             | NA           | NA                    | NA             | NA              | NA         |
| chr16:75923001-77705044  | 2                            | FAIL                      | FAIL           | FAIL         | FAIL                  | inter          | NA              | NA         |
| chr17                    | 6                            | FAIL                      | NA             | NA           | NA                    | NA             | NA              | NA         |
| chr18:6797844-24209011   | 4                            | FAIL                      | PASS           | PASS         | FAIL                  | inter          | NA              | NA         |
| chr19                    | 0                            | FAIL                      | NA             | NA           | NA                    | NA             | NA              | NA         |
| chr20                    | 0                            | FAIL                      | NA             | NA           | NA                    | NA             | NA              | NA         |
| chr21                    | 0                            | FAIL                      | NA             | NA           | NA                    | NA             | NA              | NA         |
| chr22                    | 0                            | FAIL                      | NA             | NA           | NA                    | NA             | NA              | NA         |
| chrX                     | 0                            | FAIL                      | NA             | NA           | NA                    | NA             | NA              | NA         |
| chrY                     | 0                            | FAIL                      | NA             | NA           | NA                    | NA             | NA              | NA         |

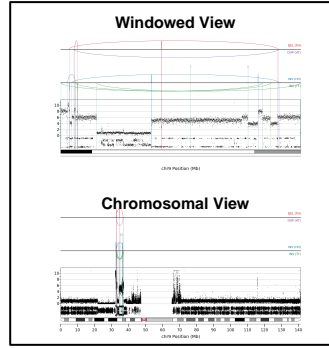

|                           | Total Pass:<br>Chromosome(s) | Window ID<br>with >= 8 SV | Window<br>Join | Window<br>AR | Window<br>Oscillation | Window<br>Type | Window<br>Chain                                                                                          | Overall    |
|---------------------------|------------------------------|---------------------------|----------------|--------------|-----------------------|----------------|----------------------------------------------------------------------------------------------------------|------------|
| chr1:711405-224208132     | 5                            | PASS                      | PASS           | PASS         | PASS                  | chain          | chr14:27047001-58875000,<br>chr18:21810227-21837269,<br>chr1:711405-224208132,<br>chr20:4783983-14509733 | Event(CR1) |
| chr2                      | 0                            | FAIL                      | NA             | NA           | NA                    | NA             | NA                                                                                                       | NA         |
| chr3                      | 0                            | FAIL                      | NA             | NA           | NA                    | NA             | NA                                                                                                       | NA         |
| chr4                      | 0                            | FAIL                      | NA             | NA           | NA                    | NA             | NA                                                                                                       | NA         |
| chr5                      | 0                            | FAIL                      | NA             | NA           | NA                    | NA             | NA                                                                                                       | NA         |
| chr6                      | 0                            | FAIL                      | NA             | NA           | NA                    | NA             | NA                                                                                                       | NA         |
| chr7                      | 3                            | FAIL                      | NA             | NA           | NA                    | NA             | NA                                                                                                       | NA         |
| chr8                      | 0                            | FAIL                      | NA             | NA           | NA                    | NA             | NA                                                                                                       | NA         |
| chr9                      | 0                            | FAIL                      | NA             | NA           | NA                    | NA             | NA                                                                                                       | NA         |
| chr10                     | 1                            | FAIL                      | NA             | NA           | NA                    | NA             | NA                                                                                                       | NA         |
| chr11                     | 0                            | FAIL                      | NA             | NA           | NA                    | NA             | NA                                                                                                       | NA         |
| chr12                     | 0                            | FAIL                      | NA             | NA           | NA                    | NA             | NA                                                                                                       | NA         |
| chr13                     | 0                            | FAIL                      | NA             | NA           | NA                    | NA             | NA                                                                                                       | NA         |
| chr14:27047001-58875000   | 6                            | FAIL                      | FAIL           | PASS         | PASS                  | chain          | chr14:27047001-58875000,<br>chr18:21810227-21837269,<br>chr1:711405-224208132,<br>chr20:4783983-14509733 | Event(CR1) |
| chr14:62902779-65183427   | 6                            | FAIL                      | FAIL           | FAIL         | FAIL                  | NA             | NA                                                                                                       | NA         |
| chr15:46323001-67509081   | 5                            | PASS                      | PASS           | PASS         | FAIL                  | inter          | NA                                                                                                       | Event(CR1) |
| chr15:101373220-102124843 | 5                            | PASS                      | PASS           | FAIL         | FAIL                  | inter          | NA                                                                                                       | NA         |
| chr16                     | 0                            | FAIL                      | NA             | NA           | NA                    | NA             | NA                                                                                                       | NA         |
| chr17                     | 0                            | FAIL                      | NA             | NA           | NA                    | NA             | NA                                                                                                       | NA         |
| chr18:21810227-21837269   | 2                            | FAIL                      | FAIL           | FAIL         | FAIL                  | chain          | chr14:27047001-58875000,<br>chr18:21810227-21837269,<br>chr1:711405-224208132,<br>chr20:4783983-14509733 | Event(CR1) |
| chr19                     | 0                            | FAIL                      | NA             | NA           | NA                    | NA             | NA                                                                                                       | NA         |
| chr20:4783983-14509733    | 6                            | PASS                      | PASS           | PASS         | PASS                  | chain          | chr14:27047001-58875000,<br>chr18:21810227-21837269,<br>chr1:711405-224208132,<br>chr20:4783983-14509733 | Event(CR1) |
| chr21                     | 0                            | FAIL                      | NA             | NA           | NA                    | NA             | NA                                                                                                       | NA         |
| chr22                     | 0                            | FAIL                      | NA             | NA           | NA                    | NA             | NA                                                                                                       | NA         |
| chrX                      | 0                            | FAIL                      | NA             | NA           | NA                    | NA             | NA                                                                                                       | NA         |
| chrY                      | 0                            | FAIL                      | NA             | NA           | NA                    | NA             | NA                                                                                                       | NA         |

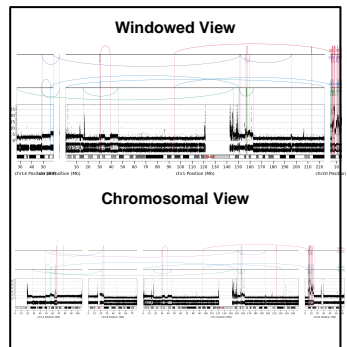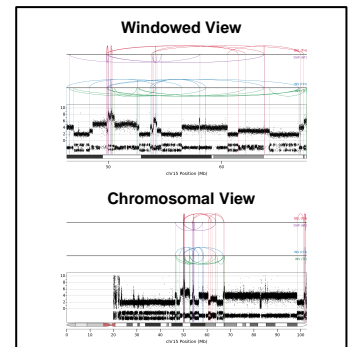

PCSI\_0081\_Pa\_P\_526

PCSI\_0081\_Pa\_P\_526

|                          | Total Pass: Chromosome(s) | Window ID with >= 8 SV | Window Join | Window AR | Window Oscillation | Window Type | Window Chain                                                                                                                                        | Overall    |
|--------------------------|---------------------------|------------------------|-------------|-----------|--------------------|-------------|-----------------------------------------------------------------------------------------------------------------------------------------------------|------------|
| chr1                     | 1                         | FAIL                   | NA          | NA        | NA                 | NA          | NA                                                                                                                                                  | NA         |
| chr2                     | 0                         | FAIL                   | NA          | NA        | NA                 | NA          | NA                                                                                                                                                  | NA         |
| chr3                     | 1                         | FAIL                   | NA          | NA        | NA                 | NA          | NA                                                                                                                                                  | NA         |
| chr4:15427510-104890034  | 2                         | FAIL                   | PASS        | FAIL      | FAIL               | chain       | chr10:54785001-110315622, chr14:10093565-103488000, chr15:66229865-95222000, chr4:15427510-104890034, chr6:1401274-17085263, chr8:21289267-21308632 | Event(CR1) |
| chr5:145519001-179497755 | 5                         | PASS                   | PASS        | PASS      | FAIL               | inter       | NA                                                                                                                                                  | Event(CR1) |
| chr6:1401274-17085263    | 5                         | PASS                   | PASS        | PASS      | PASS               | chain       | chr10:54785001-110315622, chr14:10093565-103488000, chr15:66229865-95222000, chr4:15427510-104890034, chr6:1401274-17085263, chr8:21289267-21308632 | Event(CR1) |
| chr7                     | 0                         | FAIL                   | NA          | NA        | NA                 | NA          | NA                                                                                                                                                  | NA         |
| chr8:21289267-21308632   | 2                         | FAIL                   | PASS        | FAIL      | FAIL               | chain       | chr10:54785001-110315622, chr14:10093565-103488000, chr15:66229865-95222000, chr4:15427510-104890034, chr6:1401274-17085263, chr8:21289267-21308632 | Event(CR1) |
| chr9                     | 3                         | FAIL                   | NA          | NA        | NA                 | NA          | NA                                                                                                                                                  | NA         |
| chr10:54785001-110315622 | 5                         | PASS                   | PASS        | FAIL      | PASS               | chain       | chr10:54785001-110315622, chr14:10093565-103488000, chr15:66229865-95222000, chr4:15427510-104890034, chr6:1401274-17085263, chr8:21289267-21308632 | Event(CR1) |
| chr11                    | 0                         | FAIL                   | NA          | NA        | NA                 | NA          | NA                                                                                                                                                  | NA         |
| chr12                    | 0                         | FAIL                   | NA          | NA        | NA                 | NA          | NA                                                                                                                                                  | NA         |
| chr13                    | 0                         | FAIL                   | NA          | NA        | NA                 | NA          | NA                                                                                                                                                  | NA         |
| chr14:10093565-103488000 | 2                         | FAIL                   | FAIL        | FAIL      | FAIL               | chain       | chr10:54785001-110315622, chr14:10093565-103488000, chr15:66229865-95222000, chr4:15427510-104890034, chr6:1401274-17085263, chr8:21289267-21308632 | Event(CR1) |
| chr15:66229865-95222000  | 2                         | FAIL                   | FAIL        | FAIL      | FAIL               | chain       | chr10:54785001-110315622, chr14:10093565-103488000, chr15:66229865-95222000, chr4:15427510-104890034, chr6:1401274-17085263, chr8:21289267-21308632 | Event(CR1) |
| chr16                    | 0                         | FAIL                   | NA          | NA        | NA                 | NA          | NA                                                                                                                                                  | NA         |
| chr17                    | 1                         | FAIL                   | NA          | NA        | NA                 | NA          | NA                                                                                                                                                  | NA         |
| chr18                    | 0                         | FAIL                   | NA          | NA        | NA                 | NA          | NA                                                                                                                                                  | NA         |
| chr19                    | 4                         | FAIL                   | NA          | NA        | NA                 | NA          | NA                                                                                                                                                  | NA         |
| chr20:5377001-2586173    | 6                         | PASS                   | PASS        | PASS      | PASS               | inter       | NA                                                                                                                                                  | Event(CR1) |
| chr20:58964795-59516218  | 6                         | FAIL                   | FAIL        | FAIL      | FAIL               | NA          | NA                                                                                                                                                  | NA         |
| chr21                    | 0                         | FAIL                   | NA          | NA        | NA                 | NA          | NA                                                                                                                                                  | NA         |
| chr22:17333870-50567698  | 6                         | PASS                   | PASS        | PASS      | PASS               | inter       | NA                                                                                                                                                  | Event(CR1) |
| chrX                     | 0                         | FAIL                   | NA          | NA        | NA                 | NA          | NA                                                                                                                                                  | NA         |
| chrY                     | 0                         | FAIL                   | NA          | NA        | NA                 | NA          | NA                                                                                                                                                  | NA         |

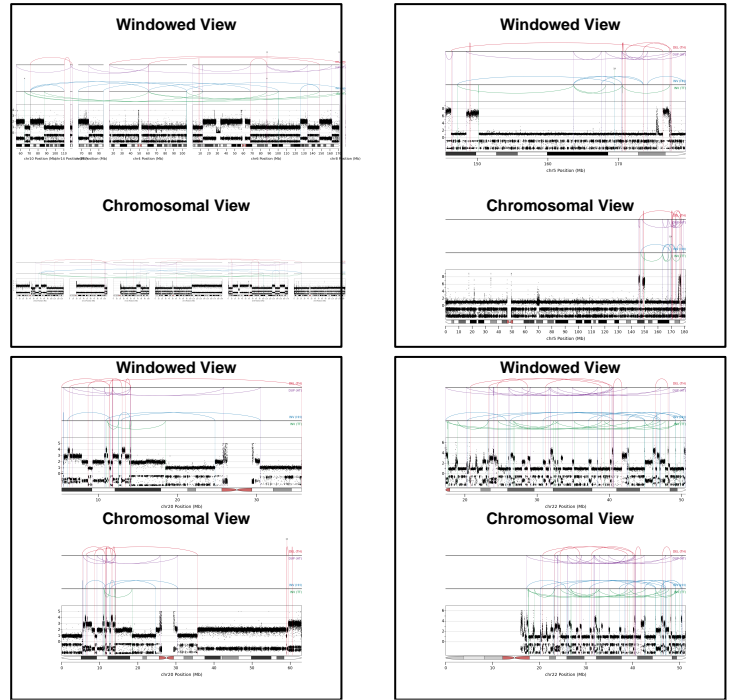

PCSI\_0082\_Pa\_P\_526

PCSI\_0082\_Pa\_P\_526

|                          | Total Pass: Chromosome(s) | Window ID with >= 8 SV | Window Join | Window AR | Window Oscillation | Window Type | Window Chain | Overall    |
|--------------------------|---------------------------|------------------------|-------------|-----------|--------------------|-------------|--------------|------------|
| chr1                     | 0                         | FAIL                   | NA          | NA        | NA                 | NA          | NA           | NA         |
| chr2                     | 2                         | FAIL                   | NA          | NA        | NA                 | NA          | NA           | NA         |
| chr3:155271694-185042636 | 2                         | FAIL                   | FAIL        | FAIL      | FAIL               | NA          | NA           | NA         |
| chr4                     | 2                         | FAIL                   | NA          | NA        | NA                 | NA          | NA           | NA         |
| chr5                     | 0                         | FAIL                   | NA          | NA        | NA                 | NA          | NA           | NA         |
| chr6                     | 1                         | FAIL                   | NA          | NA        | NA                 | NA          | NA           | NA         |
| chr7                     | 4                         | FAIL                   | NA          | NA        | NA                 | NA          | NA           | NA         |
| chr8:6262001-40943002    | 4                         | FAIL                   | FAIL        | PASS      | PASS               | inter       | NA           | Event(CR2) |
| chr9:9213001-9327154     | 4                         | FAIL                   | FAIL        | FAIL      | FAIL               | NA          | NA           | NA         |
| chr9:21798582-22202000   | 4                         | FAIL                   | FAIL        | FAIL      | FAIL               | NA          | NA           | NA         |
| chr10                    | 1                         | FAIL                   | NA          | NA        | NA                 | NA          | NA           | NA         |
| chr11                    | 0                         | FAIL                   | NA          | NA        | NA                 | NA          | NA           | NA         |
| chr12:9066621-9062264    | 5                         | FAIL                   | FAIL        | FAIL      | FAIL               | NA          | NA           | NA         |
| chr12:14530415-29964205  | 5                         | FAIL                   | FAIL        | PASS      | FAIL               | NA          | NA           | NA         |
| chr13:37189764-8639000   | 6                         | PASS                   | PASS        | PASS      | PASS               | inter       | NA           | Event(CR1) |
| chr14                    | 0                         | FAIL                   | NA          | NA        | NA                 | NA          | NA           | NA         |
| chr15:24255990-102194000 | 6                         | PASS                   | PASS        | PASS      | PASS               | inter       | NA           | Event(CR1) |
| chr16:7089949-47860085   | 6                         | PASS                   | PASS        | PASS      | PASS               | inter       | NA           | Event(CR1) |
| chr17                    | 0                         | FAIL                   | NA          | NA        | NA                 | NA          | NA           | NA         |
| chr18:1710535-32015792   | 5                         | PASS                   | PASS        | PASS      | FAIL               | inter       | NA           | Event(CR1) |
| chr19                    | 1                         | FAIL                   | NA          | NA        | NA                 | NA          | NA           | NA         |
| chr20:14702166-15026000  | 2                         | FAIL                   | FAIL        | FAIL      | FAIL               | NA          | NA           | NA         |
| chr21                    | 0                         | FAIL                   | NA          | NA        | NA                 | NA          | NA           | NA         |
| chr22                    | 0                         | FAIL                   | NA          | NA        | NA                 | NA          | NA           | NA         |
| chrX                     | 0                         | FAIL                   | NA          | NA        | NA                 | NA          | NA           | NA         |
| chrY                     | 0                         | FAIL                   | NA          | NA        | NA                 | NA          | NA           | NA         |

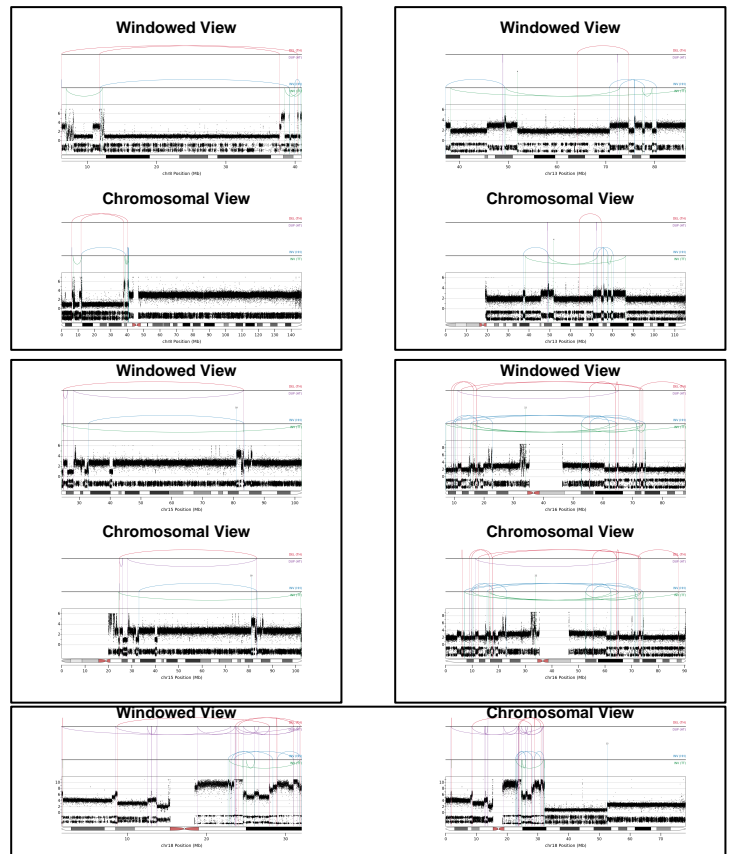

|                          | Total Pass: Chromosome(s) | Window ID with >= 8 SV | Window Join | Window AR | Window Oscillation | Window Type | Window Chain                                    | Overall    |
|--------------------------|---------------------------|------------------------|-------------|-----------|--------------------|-------------|-------------------------------------------------|------------|
| chr1:2693988-162765916   | 3                         | FAIL                   | FAIL        | PASS      | FAIL               | chain       | chr1:2693988-162765916, chr8:2693001-12884000   | NA         |
| chr2                     | 0                         | FAIL                   | NA          | NA        | NA                 | NA          | NA                                              | NA         |
| chr3                     | 3                         | FAIL                   | NA          | NA        | NA                 | NA          | NA                                              | NA         |
| chr4:190642229-190661741 | 1                         | FAIL                   | FAIL        | FAIL      | FAIL               | chain       | chr4:190642229-190661741, chr6:3702001-25410670 | NA         |
| chr5                     | 0                         | FAIL                   | NA          | NA        | NA                 | NA          | NA                                              | NA         |
| chr6:3702001-25410670    | 3                         | FAIL                   | FAIL        | FAIL      | FAIL               | chain       | chr4:190642229-190661741, chr6:3702001-25410670 | NA         |
| chr7:77579989-90060000   | 0                         | FAIL                   | FAIL        | FAIL      | FAIL               | chain       | chr16:46785092-58628765, chr7:77579989-90060000 | NA         |
| chr8:2693001-12884000    | 3                         | FAIL                   | FAIL        | PASS      | FAIL               | chain       | chr1:2693988-162765916, chr8:2693001-12884000   | NA         |
| chr9:17391699-138137000  | 2                         | FAIL                   | FAIL        | FAIL      | FAIL               | NA          | NA                                              | NA         |
| chr10                    | 0                         | FAIL                   | NA          | NA        | NA                 | NA          | NA                                              | NA         |
| chr11                    | 0                         | FAIL                   | NA          | NA        | NA                 | NA          | NA                                              | NA         |
| chr12:2300056-40219028   | 5                         | PASS                   | PASS        | PASS      | FAIL               | inter       | NA                                              | Event(CR1) |
| chr13:21670949-25919260  | 1                         | FAIL                   | FAIL        | FAIL      | FAIL               | NA          | NA                                              | NA         |
| chr14                    | 0                         | FAIL                   | NA          | NA        | NA                 | NA          | NA                                              | NA         |
| chr15                    | 0                         | FAIL                   | NA          | NA        | NA                 | NA          | NA                                              | NA         |
| chr16:46785092-58628765  | 5                         | FAIL                   | FAIL        | FAIL      | FAIL               | chain       | chr16:46785092-58628765, chr7:77579989-90060000 | NA         |
| chr17:29719331-33178119  | 4                         | FAIL                   | PASS        | FAIL      | FAIL               | inter       | NA                                              | NA         |
| chr18                    | 1                         | FAIL                   | NA          | NA        | NA                 | NA          | NA                                              | NA         |
| chr19                    | 0                         | FAIL                   | NA          | NA        | NA                 | NA          | NA                                              | NA         |
| chr20                    | 0                         | FAIL                   | NA          | NA        | NA                 | NA          | NA                                              | NA         |
| chr21                    | 0                         | FAIL                   | NA          | NA        | NA                 | NA          | NA                                              | NA         |
| chr22                    | 0                         | FAIL                   | NA          | NA        | NA                 | NA          | NA                                              | NA         |
| chrX                     | 0                         | FAIL                   | NA          | NA        | NA                 | NA          | NA                                              | NA         |
| chrY                     | 0                         | FAIL                   | NA          | NA        | NA                 | NA          | NA                                              | NA         |

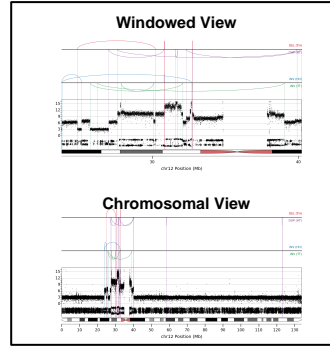

|                          | Total Pass: Chromosome(s) | Window ID with >= 8 SV | Window Join | Window AR | Window Oscillation | Window Type | Window Chain                                                                 | Overall    |
|--------------------------|---------------------------|------------------------|-------------|-----------|--------------------|-------------|------------------------------------------------------------------------------|------------|
| chr1                     | 0                         | FAIL                   | NA          | NA        | NA                 | NA          | NA                                                                           | NA         |
| chr2                     | 0                         | FAIL                   | NA          | NA        | NA                 | NA          | NA                                                                           | NA         |
| chr3                     | 2                         | FAIL                   | NA          | NA        | NA                 | NA          | NA                                                                           | NA         |
| chr4                     | 0                         | FAIL                   | NA          | NA        | NA                 | NA          | NA                                                                           | NA         |
| chr5                     | 0                         | FAIL                   | NA          | NA        | NA                 | NA          | NA                                                                           | NA         |
| chr6:3474001-46926000    | 3                         | FAIL                   | FAIL        | PASS      | FAIL               | NA          | NA                                                                           | NA         |
| chr7:111507715-152374000 | 4                         | FAIL                   | PASS        | PASS      | PASS               | chain       | chr14:19250282-106848507, chr15:22466221-102201721, chr7:111507715-152374000 | Event(CR1) |
| chr8                     | 0                         | FAIL                   | NA          | NA        | NA                 | NA          | NA                                                                           | NA         |
| chr9:23821478-32071665   | 0                         | FAIL                   | FAIL        | FAIL      | FAIL               | NA          | NA                                                                           | NA         |
| chr10                    | 0                         | FAIL                   | NA          | NA        | NA                 | NA          | NA                                                                           | NA         |
| chr11:63150797-92717000  | 5                         | PASS                   | PASS        | PASS      | PASS               | chain       | chr11:63150797-92717000, chr16:26231184-35220572                             | Event(CR1) |
| chr12                    | 0                         | FAIL                   | NA          | NA        | NA                 | NA          | NA                                                                           | NA         |
| chr13                    | 0                         | FAIL                   | NA          | NA        | NA                 | NA          | NA                                                                           | NA         |
| chr14:19250282-106848507 | 6                         | PASS                   | PASS        | PASS      | PASS               | chain       | chr14:19250282-106848507, chr15:22466221-102201721, chr7:111507715-152374000 | Event(CR1) |
| chr15:22466221-102201721 | 6                         | PASS                   | PASS        | PASS      | PASS               | chain       | chr14:19250282-106848507, chr15:22466221-102201721, chr7:111507715-152374000 | Event(CR1) |
| chr16:26231184-35220572  | 0                         | FAIL                   | FAIL        | FAIL      | FAIL               | chain       | chr11:63150797-92717000, chr16:26231184-35220572                             | Event(CR1) |
| chr17                    | 0                         | FAIL                   | NA          | NA        | NA                 | NA          | NA                                                                           | NA         |
| chr18                    | 0                         | FAIL                   | NA          | NA        | NA                 | NA          | NA                                                                           | NA         |
| chr19                    | 0                         | FAIL                   | NA          | NA        | NA                 | NA          | NA                                                                           | NA         |
| chr20                    | 0                         | FAIL                   | NA          | NA        | NA                 | NA          | NA                                                                           | NA         |
| chr21                    | 0                         | FAIL                   | NA          | NA        | NA                 | NA          | NA                                                                           | NA         |
| chr22:16648392-43463432  | 5                         | PASS                   | FAIL        | PASS      | PASS               | inter       | NA                                                                           | Event(CR2) |
| chrX                     | 0                         | FAIL                   | NA          | NA        | NA                 | NA          | NA                                                                           | NA         |
| chrY                     | 0                         | FAIL                   | NA          | NA        | NA                 | NA          | NA                                                                           | NA         |

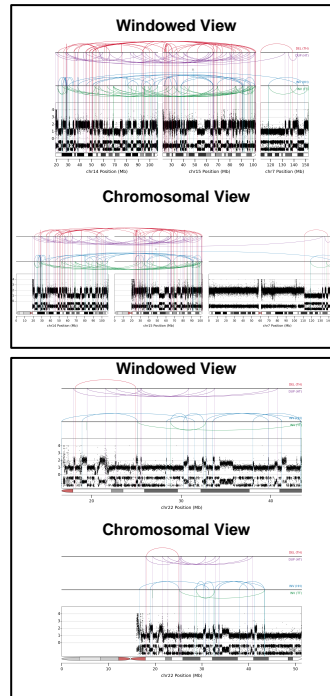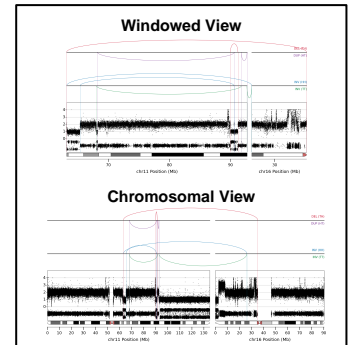

|                          | Total Pass:<br>Chromosome(s) | Window ID<br>with >= 8 SV | Window<br>Join | Window<br>AR | Window<br>Oscillation | Window<br>Type | Window<br>Chain | Overall<br>Event(CR1) |
|--------------------------|------------------------------|---------------------------|----------------|--------------|-----------------------|----------------|-----------------|-----------------------|
| chr1:7268825-237339437   | 6                            | PASS                      | PASS           | PASS         | PASS                  | inter          | NA              | NA                    |
| chr2:18442297-20656000   | 0                            | FAIL                      | FAIL           | FAIL         | FAIL                  | NA             | NA              | NA                    |
| chr3                     | 0                            | FAIL                      | NA             | NA           | NA                    | NA             | NA              | NA                    |
| chr4                     | 1                            | FAIL                      | NA             | NA           | NA                    | NA             | NA              | NA                    |
| chr5                     | 0                            | FAIL                      | NA             | NA           | NA                    | NA             | NA              | NA                    |
| chr6:21289001-53533834   | 4                            | FAIL                      | FAIL           | FAIL         | FAIL                  | NA             | NA              | NA                    |
| chr7                     | 0                            | FAIL                      | NA             | NA           | NA                    | NA             | NA              | NA                    |
| chr8:113147192-113491121 | 3                            | FAIL                      | FAIL           | FAIL         | FAIL                  | NA             | NA              | NA                    |
| chr9:21823001-22415270   | 4                            | FAIL                      | FAIL           | FAIL         | FAIL                  | NA             | NA              | NA                    |
| chr10                    | 0                            | FAIL                      | NA             | NA           | NA                    | NA             | NA              | NA                    |
| chr11                    | 2                            | FAIL                      | NA             | NA           | NA                    | NA             | NA              | NA                    |
| chr12                    | 1                            | FAIL                      | NA             | NA           | NA                    | NA             | NA              | NA                    |
| chr13                    | 0                            | FAIL                      | NA             | NA           | NA                    | NA             | NA              | NA                    |
| chr14                    | 3                            | FAIL                      | NA             | NA           | NA                    | NA             | NA              | NA                    |
| chr15                    | 0                            | FAIL                      | NA             | NA           | NA                    | NA             | NA              | NA                    |
| chr16                    | 1                            | FAIL                      | NA             | NA           | NA                    | NA             | NA              | NA                    |
| chr17                    | 1                            | FAIL                      | NA             | NA           | NA                    | NA             | NA              | NA                    |
| chr18:26919802-66027547  | 4                            | FAIL                      | FAIL           | FAIL         | FAIL                  | NA             | NA              | NA                    |
| chr19                    | 2                            | FAIL                      | NA             | NA           | NA                    | NA             | NA              | NA                    |
| chr20:3722001-19787293   | 3                            | FAIL                      | FAIL           | FAIL         | PASS                  | NA             | NA              | NA                    |
| chr21                    | 0                            | FAIL                      | NA             | NA           | NA                    | NA             | NA              | NA                    |
| chr22                    | 0                            | FAIL                      | NA             | NA           | NA                    | NA             | NA              | NA                    |
| chrX:64063463-64461151   | 2                            | FAIL                      | PASS           | FAIL         | FAIL                  | NA             | NA              | NA                    |
| chrY                     | 0                            | FAIL                      | NA             | NA           | NA                    | NA             | NA              | NA                    |

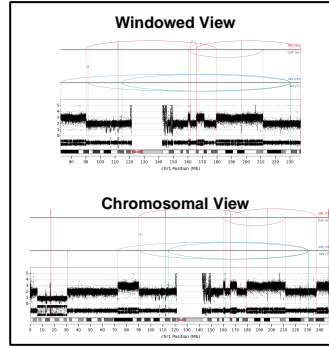

|                         | Total Pass:<br>Chromosome(s) | Window ID<br>with >= 8 SV | Window<br>Join | Window<br>AR | Window<br>Oscillation | Window<br>Type | Window<br>Chain                                    | Overall    |
|-------------------------|------------------------------|---------------------------|----------------|--------------|-----------------------|----------------|----------------------------------------------------|------------|
| chr1                    | 1                            | FAIL                      | NA             | NA           | NA                    | NA             | NA                                                 | NA         |
| chr2                    | 0                            | FAIL                      | NA             | NA           | NA                    | NA             | NA                                                 | NA         |
| chr3:3350196-40793000   | 5                            | PASS                      | PASS           | PASS         | FAIL                  | inter          | NA                                                 | Event(CR1) |
| chr4                    | 0                            | FAIL                      | NA             | NA           | NA                    | NA             | NA                                                 | NA         |
| chr5                    | 0                            | FAIL                      | NA             | NA           | NA                    | NA             | NA                                                 | NA         |
| chr6:48514390-49152864  | 2                            | FAIL                      | FAIL           | FAIL         | FAIL                  | chain          | chr11:24949001-25248000,<br>chr6:48514390-49152864 | NA         |
| chr7                    | 0                            | FAIL                      | NA             | NA           | NA                    | NA             | NA                                                 | NA         |
| chr8:32290001-43493440  | 1                            | FAIL                      | FAIL           | FAIL         | FAIL                  | NA             | NA                                                 | NA         |
| chr9                    | 0                            | FAIL                      | NA             | NA           | NA                    | NA             | NA                                                 | NA         |
| chr10                   | 0                            | FAIL                      | NA             | NA           | NA                    | NA             | NA                                                 | NA         |
| chr11:24949001-25248000 | 2                            | FAIL                      | FAIL           | FAIL         | FAIL                  | chain          | chr11:24949001-25248000,<br>chr6:48514390-49152864 | NA         |
| chr12                   | 0                            | FAIL                      | NA             | NA           | NA                    | NA             | NA                                                 | NA         |
| chr13:3580923-10942000  | 6                            | PASS                      | PASS           | PASS         | PASS                  | NA             | NA                                                 | NA         |
| chr14                   | 0                            | FAIL                      | NA             | NA           | NA                    | NA             | NA                                                 | NA         |
| chr15                   | 0                            | FAIL                      | NA             | NA           | NA                    | NA             | NA                                                 | NA         |
| chr16                   | 0                            | FAIL                      | NA             | NA           | NA                    | NA             | NA                                                 | NA         |
| chr17                   | 2                            | FAIL                      | NA             | NA           | NA                    | NA             | NA                                                 | NA         |
| chr18                   | 0                            | FAIL                      | NA             | NA           | NA                    | NA             | NA                                                 | NA         |
| chr19                   | 4                            | FAIL                      | NA             | NA           | NA                    | NA             | NA                                                 | NA         |
| chr20:22650867-62658813 | 5                            | FAIL                      | PASS           | PASS         | FAIL                  | NA             | NA                                                 | NA         |
| chr21                   | 0                            | FAIL                      | NA             | NA           | NA                    | NA             | NA                                                 | NA         |
| chr22                   | 0                            | FAIL                      | NA             | NA           | NA                    | NA             | NA                                                 | NA         |
| chrX                    | 0                            | FAIL                      | NA             | NA           | NA                    | NA             | NA                                                 | NA         |
| chrY                    | 0                            | FAIL                      | NA             | NA           | NA                    | NA             | NA                                                 | NA         |

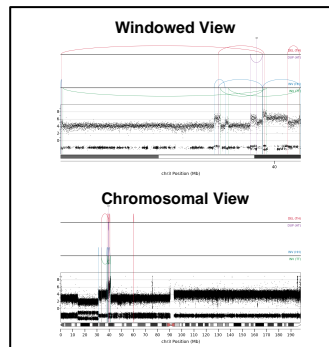

|                           | Total Pass: Chromosome(s) | Window ID with >= 8 SV | Window Join | Window AR | Window Oscillation | Window Type | Window Chain                                    | Overall    |
|---------------------------|---------------------------|------------------------|-------------|-----------|--------------------|-------------|-------------------------------------------------|------------|
| chr1                      | 0                         | FAIL                   | NA          | NA        | NA                 | NA          | NA                                              | NA         |
| chr2                      | 0                         | FAIL                   | NA          | NA        | NA                 | NA          | NA                                              | NA         |
| chr3                      | 0                         | FAIL                   | NA          | NA        | NA                 | NA          | NA                                              | NA         |
| chr4                      | 0                         | FAIL                   | NA          | NA        | NA                 | NA          | NA                                              | NA         |
| chr5                      | 1                         | FAIL                   | NA          | NA        | NA                 | NA          | NA                                              | NA         |
| chr6                      | 1                         | FAIL                   | NA          | NA        | NA                 | NA          | NA                                              | NA         |
| chr7:56717499-56814099    | 0                         | FAIL                   | FAIL        | FAIL      | FAIL               | chain       | chr12:19633912-77195612, chr7:56717499-56814099 | Event(CR1) |
| chr8                      | 0                         | FAIL                   | NA          | NA        | NA                 | NA          | NA                                              | NA         |
| chr9                      | 1                         | FAIL                   | NA          | NA        | NA                 | NA          | NA                                              | NA         |
| chr10                     | 0                         | FAIL                   | NA          | NA        | NA                 | NA          | NA                                              | NA         |
| chr11                     | 1                         | FAIL                   | NA          | NA        | NA                 | NA          | NA                                              | NA         |
| chr12:19633912-77195612   | 5                         | PASS                   | PASS        | PASS      | FAIL               | chain       | chr12:19633912-77195612, chr7:56717499-56814099 | Event(CR1) |
| chr12:111912962-112643161 | 5                         | FAIL                   | FAIL        | FAIL      | FAIL               | NA          | NA                                              | NA         |
| chr13                     | 2                         | FAIL                   | NA          | NA        | NA                 | NA          | NA                                              | NA         |
| chr14                     | 0                         | FAIL                   | NA          | NA        | NA                 | NA          | NA                                              | NA         |
| chr15                     | 0                         | FAIL                   | NA          | NA        | NA                 | NA          | NA                                              | NA         |
| chr16                     | 0                         | FAIL                   | NA          | NA        | NA                 | NA          | NA                                              | NA         |
| chr17                     | 0                         | FAIL                   | NA          | NA        | NA                 | NA          | NA                                              | NA         |
| chr18:20482001-25468361   | 1                         | FAIL                   | FAIL        | FAIL      | FAIL               | NA          | NA                                              | NA         |
| chr19                     | 0                         | FAIL                   | NA          | NA        | NA                 | NA          | NA                                              | NA         |
| chr20:37732001-51508950   | 5                         | FAIL                   | FAIL        | FAIL      | FAIL               | NA          | NA                                              | NA         |
| chr21                     | 0                         | FAIL                   | NA          | NA        | NA                 | NA          | NA                                              | NA         |
| chr22:29757845-29927000   | 2                         | FAIL                   | FAIL        | FAIL      | FAIL               | NA          | NA                                              | NA         |
| chrX                      | 0                         | FAIL                   | NA          | NA        | NA                 | NA          | NA                                              | NA         |
| chrY                      | 0                         | FAIL                   | NA          | NA        | NA                 | NA          | NA                                              | NA         |

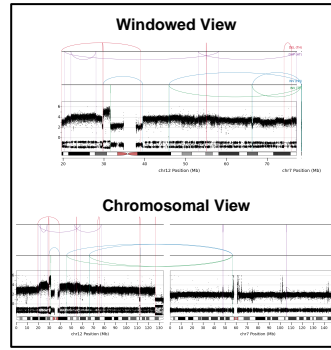

|                          | Total Pass: Chromosome(s) | Window ID with >= 8 SV | Window Join | Window AR | Window Oscillation | Window Type | Window Chain                                                             | Overall    |
|--------------------------|---------------------------|------------------------|-------------|-----------|--------------------|-------------|--------------------------------------------------------------------------|------------|
| chr1:5645001-10589022    | 6                         | PASS                   | PASS        | PASS      | FAIL               | inter       | NA                                                                       | Event(CR1) |
| chr1:22473077-24702905   | 6                         | PASS                   | PASS        | PASS      | PASS               | inter       | NA                                                                       | Event(CR1) |
| chr2:137920001-146682453 | 2                         | FAIL                   | FAIL        | FAIL      | FAIL               | NA          | NA                                                                       | NA         |
| chr3:4690049-161090000   | 4                         | FAIL                   | PASS        | PASS      | PASS               | chain       | chr17:53878341-60459185, chr3:4690049-161090000, chr8:12945001-129797000 | Event(CR2) |
| chr4:1403211-46042043    | 1                         | FAIL                   | FAIL        | FAIL      | FAIL               | NA          | NA                                                                       | NA         |
| chr5:11033718-40766702   | 5                         | FAIL                   | PASS        | PASS      | PASS               | NA          | NA                                                                       | NA         |
| chr6:103782441-18188007  | 5                         | PASS                   | PASS        | PASS      | FAIL               | inter       | NA                                                                       | Event(CR1) |
| chr7                     | 0                         | FAIL                   | NA          | NA        | NA                 | NA          | NA                                                                       | NA         |
| chr8:12945001-129797000  | 3                         | FAIL                   | FAIL        | PASS      | PASS               | chain       | chr17:53878341-60459185, chr3:4690049-161090000, chr8:12945001-129797000 | Event(CR2) |
| chr9                     | 0                         | FAIL                   | NA          | NA        | NA                 | NA          | NA                                                                       | NA         |
| chr10:5513832-45337780   | 5                         | PASS                   | PASS        | PASS      | FAIL               | NA          | NA                                                                       | NA         |
| chr11:6594746-118844000  | 6                         | PASS                   | PASS        | PASS      | PASS               | inter       | NA                                                                       | Event(CR1) |
| chr12:57182013-66051807  | 6                         | FAIL                   | FAIL        | FAIL      | FAIL               | NA          | NA                                                                       | NA         |
| chr13                    | 0                         | FAIL                   | NA          | NA        | NA                 | NA          | NA                                                                       | NA         |
| chr14                    | 0                         | FAIL                   | NA          | NA        | NA                 | NA          | NA                                                                       | NA         |
| chr15                    | 0                         | FAIL                   | NA          | NA        | NA                 | NA          | NA                                                                       | NA         |
| chr16                    | 0                         | FAIL                   | NA          | NA        | NA                 | NA          | NA                                                                       | NA         |
| chr17:53878341-60459185  | 2                         | FAIL                   | PASS        | FAIL      | FAIL               | chain       | chr17:53878341-60459185, chr3:4690049-161090000, chr8:12945001-129797000 | Event(CR2) |
| chr18:5882001-19800442   | 3                         | FAIL                   | FAIL        | FAIL      | FAIL               | NA          | NA                                                                       | NA         |
| chr19                    | 2                         | FAIL                   | NA          | NA        | NA                 | NA          | NA                                                                       | NA         |
| chr20                    | 0                         | FAIL                   | NA          | NA        | NA                 | NA          | NA                                                                       | NA         |
| chr21                    | 0                         | FAIL                   | NA          | NA        | NA                 | NA          | NA                                                                       | NA         |
| chr22                    | 0                         | FAIL                   | NA          | NA        | NA                 | NA          | NA                                                                       | NA         |
| chrX                     | 0                         | FAIL                   | NA          | NA        | NA                 | NA          | NA                                                                       | NA         |
| chrY                     | 0                         | FAIL                   | NA          | NA        | NA                 | NA          | NA                                                                       | NA         |

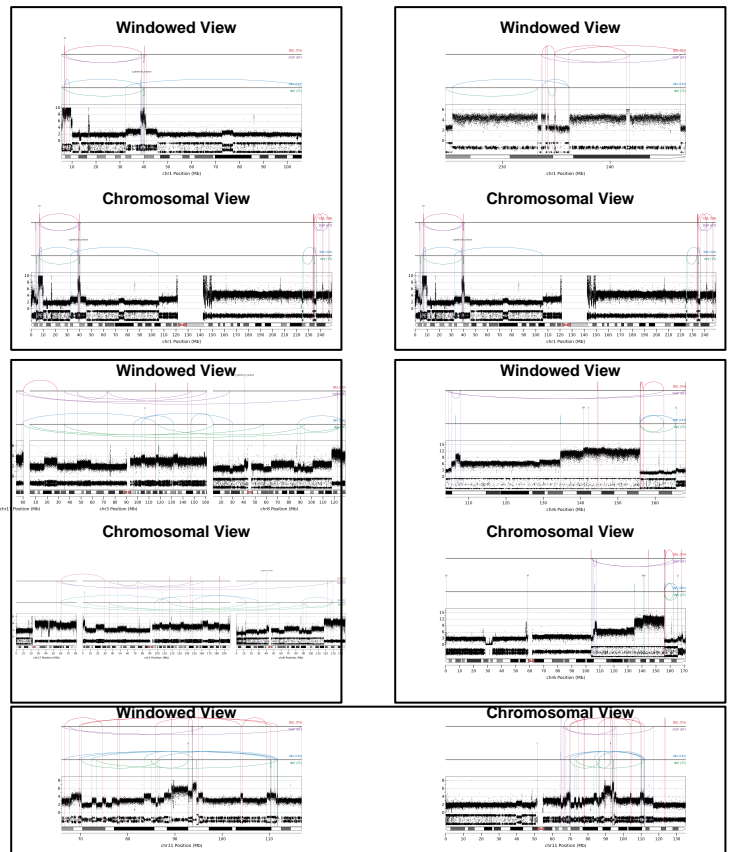



|                         | Total Pass:<br>Chromosome(6) | Window ID<br>with >= 8 SV | Window<br>Join | Window<br>AR | Window<br>Oscillation | Window<br>Type | Window<br>Chain                                     | Overall    |
|-------------------------|------------------------------|---------------------------|----------------|--------------|-----------------------|----------------|-----------------------------------------------------|------------|
| chr1                    | 0                            | FAIL                      | NA             | NA           | NA                    | NA             | NA                                                  | NA         |
| chr2                    | 0                            | FAIL                      | NA             | NA           | NA                    | NA             | NA                                                  | NA         |
| chr3                    | 0                            | FAIL                      | NA             | NA           | NA                    | NA             | NA                                                  | NA         |
| chr4                    | 0                            | FAIL                      | NA             | NA           | NA                    | NA             | NA                                                  | NA         |
| chr5                    | 0                            | FAIL                      | NA             | NA           | NA                    | NA             | NA                                                  | NA         |
| chr6                    | 0                            | FAIL                      | NA             | NA           | NA                    | NA             | NA                                                  | NA         |
| chr7                    | 0                            | FAIL                      | NA             | NA           | NA                    | NA             | NA                                                  | NA         |
| chr8                    | 0                            | FAIL                      | NA             | NA           | NA                    | NA             | NA                                                  | NA         |
| chr9                    | 0                            | FAIL                      | NA             | NA           | NA                    | NA             | NA                                                  | NA         |
| chr10:25942001-64013019 | 6                            | PASS                      | PASS           | PASS         | PASS                  | chain          | chr10:25942001-64013019,<br>chr18:10191618-26099000 | Event(CR1) |
| chr11:23837769-76341155 | 5                            | PASS                      | PASS           | PASS         | FAIL                  | NA             | NA                                                  | NA         |
| chr12:28678001-77383370 | 6                            | PASS                      | PASS           | FAIL         | PASS                  | inter          | NA                                                  | Event(CR2) |
| chr13                   | 0                            | FAIL                      | NA             | NA           | NA                    | NA             | NA                                                  | NA         |
| chr14:54443557-54457039 | 5                            | FAIL                      | FAIL           | FAIL         | FAIL                  | NA             | NA                                                  | NA         |
| chr15                   | 0                            | FAIL                      | NA             | NA           | NA                    | NA             | NA                                                  | NA         |
| chr16                   | 0                            | FAIL                      | NA             | NA           | NA                    | NA             | NA                                                  | NA         |
| chr17                   | 1                            | FAIL                      | NA             | NA           | NA                    | NA             | NA                                                  | NA         |
| chr18:10191618-26099000 | 3                            | FAIL                      | PASS           | FAIL         | FAIL                  | chain          | chr10:25942001-64013019,<br>chr18:10191618-26099000 | Event(CR1) |
| chr19                   | 0                            | FAIL                      | NA             | NA           | NA                    | NA             | NA                                                  | NA         |
| chr20                   | 0                            | FAIL                      | NA             | NA           | NA                    | NA             | NA                                                  | NA         |
| chr21                   | 0                            | FAIL                      | NA             | NA           | NA                    | NA             | NA                                                  | NA         |
| chr22                   | 0                            | FAIL                      | NA             | NA           | NA                    | NA             | NA                                                  | NA         |
| chrX                    | 0                            | FAIL                      | NA             | NA           | NA                    | NA             | NA                                                  | NA         |
| chrY                    | 0                            | FAIL                      | NA             | NA           | NA                    | NA             | NA                                                  | NA         |

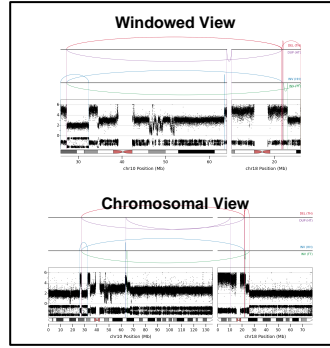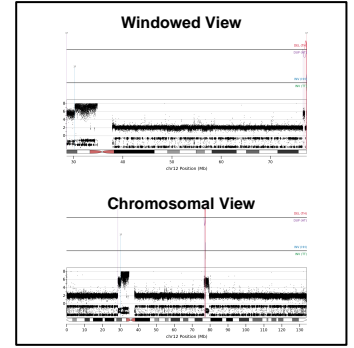

|                          | Total Pass:<br>Chromosome(6) | Window ID<br>with >= 8 SV | Window<br>Join | Window<br>AR | Window<br>Oscillation | Window<br>Type | Window<br>Chain                                                                | Overall    |
|--------------------------|------------------------------|---------------------------|----------------|--------------|-----------------------|----------------|--------------------------------------------------------------------------------|------------|
| chr1                     | 3                            | FAIL                      | NA             | NA           | NA                    | NA             | NA                                                                             | NA         |
| chr2                     | 3                            | FAIL                      | NA             | NA           | NA                    | NA             | NA                                                                             | NA         |
| chr3                     | 3                            | FAIL                      | NA             | NA           | NA                    | NA             | NA                                                                             | NA         |
| chr4:91318816-92063535   | 4                            | FAIL                      | FAIL           | FAIL         | FAIL                  | NA             | NA                                                                             | NA         |
| chr4:106860903-108184000 | 4                            | FAIL                      | FAIL           | FAIL         | FAIL                  | NA             | NA                                                                             | NA         |
| chr5:5837267-116054236   | 4                            | FAIL                      | FAIL           | PASS         | FAIL                  | NA             | NA                                                                             | NA         |
| chr6:1950845-2233304     | 3                            | FAIL                      | FAIL           | FAIL         | FAIL                  | NA             | NA                                                                             | NA         |
| chr7                     | 3                            | FAIL                      | NA             | NA           | NA                    | NA             | NA                                                                             | NA         |
| chr8:19052905-14296559   | 5                            | PASS                      | PASS           | PASS         | PASS                  | chain          | chr14:23421680-107122709,<br>chr19:5064997-46549000,<br>chr8:19052905-14296559 | Event(CR1) |
| chr9                     | 3                            | FAIL                      | NA             | NA           | NA                    | NA             | NA                                                                             | NA         |
| chr10                    | 2                            | FAIL                      | NA             | NA           | NA                    | NA             | NA                                                                             | NA         |
| chr11                    | 3                            | FAIL                      | NA             | NA           | NA                    | NA             | NA                                                                             | NA         |
| chr12                    | 4                            | FAIL                      | NA             | NA           | NA                    | NA             | NA                                                                             | NA         |
| chr13                    | 3                            | FAIL                      | NA             | NA           | NA                    | NA             | NA                                                                             | NA         |
| chr14:20383487-20514081  | 6                            | FAIL                      | FAIL           | FAIL         | FAIL                  | NA             | NA                                                                             | NA         |
| chr14:23421680-107122709 | 6                            | PASS                      | PASS           | PASS         | PASS                  | chain          | chr14:23421680-107122709,<br>chr19:5064997-46549000,<br>chr8:19052905-14296559 | Event(DR1) |
| chr15:56314808-65046981  | 3                            | FAIL                      | FAIL           | FAIL         | FAIL                  | NA             | NA                                                                             | NA         |
| chr16:47968726-71056398  | 4                            | FAIL                      | FAIL           | FAIL         | FAIL                  | NA             | NA                                                                             | NA         |
| chr17                    | 1                            | FAIL                      | NA             | NA           | NA                    | NA             | NA                                                                             | NA         |
| chr18:3500001-76204610   | 5                            | PASS                      | PASS           | PASS         | FAIL                  | inter          | NA                                                                             | Event(CR1) |
| chr19:5064997-46549000   | 5                            | PASS                      | PASS           | PASS         | FAIL                  | chain          | chr14:23421680-107122709,<br>chr19:5064997-46549000,<br>chr8:19052905-14296559 | Event(CR1) |
| chr20:18846509-25908818  | 2                            | FAIL                      | FAIL           | FAIL         | FAIL                  | NA             | NA                                                                             | NA         |
| chr21                    | 2                            | FAIL                      | NA             | NA           | NA                    | NA             | NA                                                                             | NA         |
| chr22:49523942-51054000  | 0                            | FAIL                      | FAIL           | FAIL         | FAIL                  | NA             | NA                                                                             | NA         |
| chrX                     | 1                            | FAIL                      | NA             | NA           | NA                    | NA             | NA                                                                             | NA         |
| chrY                     | 0                            | FAIL                      | NA             | NA           | NA                    | NA             | NA                                                                             | NA         |

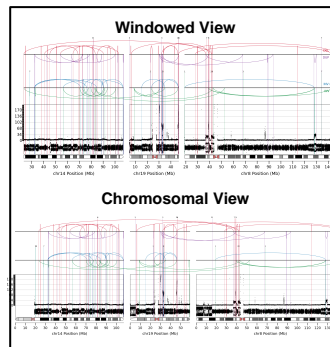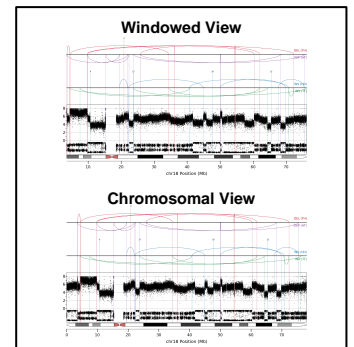

|                          | Total Pass:<br>Chromosome(s) | Window ID<br>with >= 8 SV | Window<br>Join | Window<br>AR | Window<br>Oscillation | Window<br>Type | Window<br>Chain | Overall    |
|--------------------------|------------------------------|---------------------------|----------------|--------------|-----------------------|----------------|-----------------|------------|
| chr1                     | 0                            | FAIL                      | NA             | NA           | NA                    | NA             | NA              | NA         |
| chr2:58641001-63191747   | 1                            | FAIL                      | FAIL           | FAIL         | FAIL                  | NA             | NA              | NA         |
| chr3                     | 1                            | FAIL                      | NA             | NA           | NA                    | NA             | NA              | NA         |
| chr4:91606712-91974284   | 6                            | FAIL                      | FAIL           | FAIL         | FAIL                  | NA             | NA              | NA         |
| chr4:164651947-176242000 | 6                            | FAIL                      | PASS           | FAIL         | FAIL                  | NA             | NA              | NA         |
| chr5                     | 0                            | FAIL                      | NA             | NA           | NA                    | NA             | NA              | NA         |
| chr6                     | 0                            | FAIL                      | NA             | NA           | NA                    | NA             | NA              | NA         |
| chr7                     | 0                            | FAIL                      | NA             | NA           | NA                    | NA             | NA              | NA         |
| chr8                     | 0                            | FAIL                      | NA             | NA           | NA                    | NA             | NA              | NA         |
| chr9                     | 0                            | FAIL                      | NA             | NA           | NA                    | NA             | NA              | NA         |
| chr10                    | 3                            | FAIL                      | NA             | NA           | NA                    | NA             | NA              | NA         |
| chr11                    | 0                            | FAIL                      | NA             | NA           | NA                    | NA             | NA              | NA         |
| chr12                    | 0                            | FAIL                      | NA             | NA           | NA                    | NA             | NA              | NA         |
| chr13                    | 0                            | FAIL                      | NA             | NA           | NA                    | NA             | NA              | NA         |
| chr14                    | 0                            | FAIL                      | NA             | NA           | NA                    | NA             | NA              | NA         |
| chr15                    | 0                            | FAIL                      | NA             | NA           | NA                    | NA             | NA              | NA         |
| chr16:33785523-89933000  | 6                            | PASS                      | PASS           | PASS         | PASS                  | inter          | NA              | Event(CR1) |
| chr17                    | 0                            | FAIL                      | NA             | NA           | NA                    | NA             | NA              | NA         |
| chr18:1485450-21963017   | 1                            | FAIL                      | FAIL           | FAIL         | FAIL                  | NA             | NA              | NA         |
| chr19                    | 0                            | FAIL                      | NA             | NA           | NA                    | NA             | NA              | NA         |
| chr20                    | 1                            | FAIL                      | NA             | NA           | NA                    | NA             | NA              | NA         |
| chr21                    | 0                            | FAIL                      | NA             | NA           | NA                    | NA             | NA              | NA         |
| chr22                    | 0                            | FAIL                      | NA             | NA           | NA                    | NA             | NA              | NA         |
| chrX                     | 0                            | FAIL                      | NA             | NA           | NA                    | NA             | NA              | NA         |
| chrY                     | 0                            | FAIL                      | NA             | NA           | NA                    | NA             | NA              | NA         |

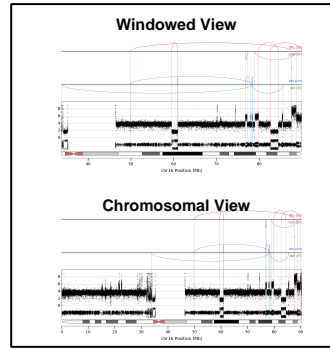

|                         | Total Pass:<br>Chromosome(s) | Window ID<br>with >= 8 SV | Window<br>Join | Window<br>AR | Window<br>Oscillation | Window<br>Type | Window<br>Chain | Overall    |
|-------------------------|------------------------------|---------------------------|----------------|--------------|-----------------------|----------------|-----------------|------------|
| chr1                    | 0                            | FAIL                      | NA             | NA           | NA                    | NA             | NA              | NA         |
| chr2                    | 0                            | FAIL                      | NA             | NA           | NA                    | NA             | NA              | NA         |
| chr3                    | 0                            | FAIL                      | NA             | NA           | NA                    | NA             | NA              | NA         |
| chr4                    | 0                            | FAIL                      | NA             | NA           | NA                    | NA             | NA              | NA         |
| chr5:10806091-11072115  | 0                            | FAIL                      | FAIL           | FAIL         | FAIL                  | NA             | NA              | NA         |
| chr6                    | 0                            | FAIL                      | NA             | NA           | NA                    | NA             | NA              | NA         |
| chr7                    | 0                            | FAIL                      | NA             | NA           | NA                    | NA             | NA              | NA         |
| chr8:36422294-40949000  | 2                            | FAIL                      | FAIL           | FAIL         | FAIL                  | NA             | NA              | NA         |
| chr9                    | 0                            | FAIL                      | NA             | NA           | NA                    | NA             | NA              | NA         |
| chr10                   | 0                            | FAIL                      | NA             | NA           | NA                    | NA             | NA              | NA         |
| chr11                   | 0                            | FAIL                      | NA             | NA           | NA                    | NA             | NA              | NA         |
| chr12                   | 0                            | FAIL                      | NA             | NA           | NA                    | NA             | NA              | NA         |
| chr13                   | 0                            | FAIL                      | NA             | NA           | NA                    | NA             | NA              | NA         |
| chr14                   | 0                            | FAIL                      | NA             | NA           | NA                    | NA             | NA              | NA         |
| chr15                   | 0                            | FAIL                      | NA             | NA           | NA                    | NA             | NA              | NA         |
| chr16                   | 0                            | FAIL                      | NA             | NA           | NA                    | NA             | NA              | NA         |
| chr17                   | 1                            | FAIL                      | NA             | NA           | NA                    | NA             | NA              | NA         |
| chr18                   | 0                            | FAIL                      | NA             | NA           | NA                    | NA             | NA              | NA         |
| chr19:28420607-34376000 | 6                            | PASS                      | PASS           | PASS         | FAIL                  | inter          | NA              | Event(CR1) |
| chr19:46412611-46922000 | 6                            | FAIL                      | FAIL           | FAIL         | FAIL                  | NA             | NA              | NA         |
| chr20                   | 0                            | FAIL                      | NA             | NA           | NA                    | NA             | NA              | NA         |
| chr21                   | 0                            | FAIL                      | NA             | NA           | NA                    | NA             | NA              | NA         |
| chr22                   | 0                            | FAIL                      | NA             | NA           | NA                    | NA             | NA              | NA         |
| chrX                    | 0                            | FAIL                      | NA             | NA           | NA                    | NA             | NA              | NA         |
| chrY                    | 0                            | FAIL                      | NA             | NA           | NA                    | NA             | NA              | NA         |

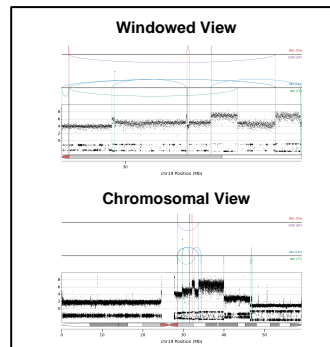

|                         | Total Pass: Chromosome(s) | Window ID with >= 8 SV | Window Join | Window AR | Window Oscillation | Window Type | Window Chain                                    | Overall    |
|-------------------------|---------------------------|------------------------|-------------|-----------|--------------------|-------------|-------------------------------------------------|------------|
| chr1                    | 0                         | FAIL                   | NA          | NA        | NA                 | NA          | NA                                              | NA         |
| chr2                    | 0                         | FAIL                   | NA          | NA        | NA                 | NA          | NA                                              | NA         |
| chr3                    | 0                         | FAIL                   | NA          | NA        | NA                 | NA          | NA                                              | NA         |
| chr4                    | 0                         | FAIL                   | NA          | NA        | NA                 | NA          | NA                                              | NA         |
| chr5                    | 0                         | FAIL                   | NA          | NA        | NA                 | NA          | NA                                              | NA         |
| chr6:41379001-81982000  | 3                         | FAIL                   | PASS        | FAIL      | FAIL               | inter       | NA                                              | NA         |
| chr7                    | 0                         | FAIL                   | NA          | NA        | NA                 | NA          | NA                                              | NA         |
| chr8                    | 0                         | FAIL                   | NA          | NA        | NA                 | NA          | NA                                              | NA         |
| chr9:30530921-35000887  | 1                         | FAIL                   | FAIL        | FAIL      | FAIL               | chain       | chr18:22873001-35355700, chr9:30530921-35000887 | Event(CR2) |
| chr10                   | 0                         | FAIL                   | NA          | NA        | NA                 | NA          | NA                                              | NA         |
| chr11                   | 0                         | FAIL                   | NA          | NA        | NA                 | NA          | NA                                              | NA         |
| chr12                   | 0                         | FAIL                   | NA          | NA        | NA                 | NA          | NA                                              | NA         |
| chr13:74288459-11511854 | 2                         | FAIL                   | FAIL        | FAIL      | FAIL               | NA          | NA                                              | NA         |
| chr14                   | 0                         | FAIL                   | NA          | NA        | NA                 | NA          | NA                                              | NA         |
| chr15                   | 0                         | FAIL                   | NA          | NA        | NA                 | NA          | NA                                              | NA         |
| chr16                   | 0                         | FAIL                   | NA          | NA        | NA                 | NA          | NA                                              | NA         |
| chr17                   | 0                         | FAIL                   | NA          | NA        | NA                 | NA          | NA                                              | NA         |
| chr18:22873001-35355700 | 5                         | FAIL                   | FAIL        | PASS      | PASS               | chain       | chr18:22873001-35355700, chr9:30530921-35000887 | Event(CR2) |
| chr19                   | 0                         | FAIL                   | NA          | NA        | NA                 | NA          | NA                                              | NA         |
| chr20                   | 0                         | FAIL                   | NA          | NA        | NA                 | NA          | NA                                              | NA         |
| chr21                   | 0                         | FAIL                   | NA          | NA        | NA                 | NA          | NA                                              | NA         |
| chr22                   | 0                         | FAIL                   | NA          | NA        | NA                 | NA          | NA                                              | NA         |
| chrX                    | 0                         | FAIL                   | NA          | NA        | NA                 | NA          | NA                                              | NA         |
| chrY                    | 0                         | FAIL                   | NA          | NA        | NA                 | NA          | NA                                              | NA         |

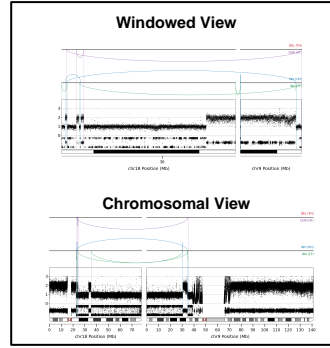

|                          | Total Pass: Chromosome(s) | Window ID with >= 8 SV | Window Join | Window AR | Window Oscillation | Window Type | Window Chain                                   | Overall    |
|--------------------------|---------------------------|------------------------|-------------|-----------|--------------------|-------------|------------------------------------------------|------------|
| chr1:40488001-40731122   | 3                         | FAIL                   | FAIL        | FAIL      | FAIL               | NA          | NA                                             | NA         |
| chr2:11515581-153721549  | 2                         | FAIL                   | FAIL        | PASS      | FAIL               | NA          | NA                                             | NA         |
| chr3                     | 3                         | FAIL                   | NA          | NA        | NA                 | NA          | NA                                             | NA         |
| chr4:55698656-55812027   | 2                         | FAIL                   | FAIL        | FAIL      | FAIL               | chain       | chr4:55698656-55812027, chr9:37796037-37820862 | NA         |
| chr4:153342748-163556153 | 2                         | FAIL                   | FAIL        | FAIL      | FAIL               | NA          | NA                                             | NA         |
| chr5:130769001-169835490 | 3                         | FAIL                   | FAIL        | PASS      | FAIL               | NA          | NA                                             | NA         |
| chr6                     | 3                         | FAIL                   | NA          | NA        | NA                 | NA          | NA                                             | NA         |
| chr7                     | 0                         | FAIL                   | NA          | NA        | NA                 | NA          | NA                                             | NA         |
| chr8:86022587-141819757  | 0                         | FAIL                   | FAIL        | FAIL      | FAIL               | NA          | NA                                             | NA         |
| chr9:37796037-37820862   | 2                         | FAIL                   | FAIL        | FAIL      | FAIL               | chain       | chr4:55698656-55812027, chr9:37796037-37820862 | NA         |
| chr10                    | 0                         | FAIL                   | NA          | NA        | NA                 | NA          | NA                                             | NA         |
| chr11:5430001-80867710   | 6                         | PASS                   | PASS        | PASS      | PASS               | inter       | NA                                             | Event(CR1) |
| chr12                    | 1                         | FAIL                   | NA          | NA        | NA                 | NA          | NA                                             | NA         |
| chr13                    | 0                         | FAIL                   | NA          | NA        | NA                 | NA          | NA                                             | NA         |
| chr14:55091211-87318000  | 2                         | FAIL                   | FAIL        | FAIL      | FAIL               | NA          | NA                                             | NA         |
| chr15                    | 0                         | FAIL                   | NA          | NA        | NA                 | NA          | NA                                             | NA         |
| chr16                    | 3                         | FAIL                   | NA          | NA        | NA                 | NA          | NA                                             | NA         |
| chr17:18902044-30708066  | 4                         | FAIL                   | FAIL        | FAIL      | FAIL               | NA          | NA                                             | NA         |
| chr18                    | 1                         | FAIL                   | NA          | NA        | NA                 | NA          | NA                                             | NA         |
| chr19                    | 0                         | FAIL                   | NA          | NA        | NA                 | NA          | NA                                             | NA         |
| chr20                    | 0                         | FAIL                   | NA          | NA        | NA                 | NA          | NA                                             | NA         |
| chr21                    | 0                         | FAIL                   | NA          | NA        | NA                 | NA          | NA                                             | NA         |
| chr22:19885702-50341000  | 1                         | FAIL                   | FAIL        | PASS      | FAIL               | NA          | NA                                             | NA         |
| chrX:14214932-14352349   | 0                         | FAIL                   | FAIL        | FAIL      | FAIL               | NA          | NA                                             | NA         |
| chrY                     | 0                         | FAIL                   | NA          | NA        | NA                 | NA          | NA                                             | NA         |

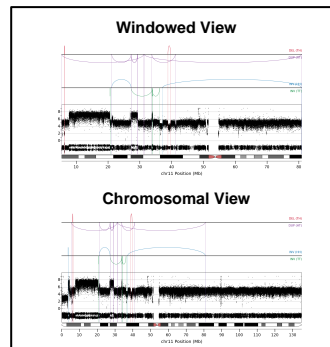

|                           | Total Pass: Chromosome(s) | Window ID with >= 8 SV | Window Join | Window AR | Window Oscillation | Window Type | Window Chain                                                                  | Overall    |
|---------------------------|---------------------------|------------------------|-------------|-----------|--------------------|-------------|-------------------------------------------------------------------------------|------------|
| chr1:75556989-215134804   | 1                         | FAIL                   | FAIL        | FAIL      | FAIL               | NA          | NA                                                                            | NA         |
| chr2                      | 0                         | FAIL                   | NA          | NA        | NA                 | NA          | NA                                                                            | NA         |
| chr3:46122724-83085000    | 5                         | FAIL                   | FAIL        | FAIL      | FAIL               | NA          | NA                                                                            | NA         |
| chr3:123687001-136429461  | 5                         | FAIL                   | PASS        | FAIL      | FAIL               | chain       | chr11:104027413-104618080, chr13:92886051-109392801, chr3:123687001-136429461 | Event(CR1) |
| chr4                      | 2                         | FAIL                   | NA          | NA        | NA                 | NA          | NA                                                                            | NA         |
| chr5                      | 0                         | FAIL                   | NA          | NA        | NA                 | NA          | NA                                                                            | NA         |
| chr6                      | 0                         | FAIL                   | NA          | NA        | NA                 | NA          | NA                                                                            | NA         |
| chr7:123006920-123004554  | 1                         | FAIL                   | FAIL        | FAIL      | FAIL               | NA          | NA                                                                            | NA         |
| chr8                      | 0                         | FAIL                   | NA          | NA        | NA                 | NA          | NA                                                                            | NA         |
| chr9                      | 0                         | FAIL                   | NA          | NA        | NA                 | NA          | NA                                                                            | NA         |
| chr10                     | 0                         | FAIL                   | NA          | NA        | NA                 | NA          | NA                                                                            | NA         |
| chr11:104027413-104618080 | 3                         | FAIL                   | FAIL        | FAIL      | FAIL               | chain       | chr11:104027413-104618080, chr13:92886051-109392801, chr3:123687001-136429461 | Event(CR1) |
| chr12                     | 0                         | FAIL                   | NA          | NA        | NA                 | NA          | NA                                                                            | NA         |
| chr13:92886051-109392801  | 6                         | PASS                   | PASS        | PASS      | PASS               | chain       | chr11:104027413-104618080, chr13:92886051-109392801, chr3:123687001-136429461 | Event(CR1) |
| chr14                     | 0                         | FAIL                   | NA          | NA        | NA                 | NA          | NA                                                                            | NA         |
| chr15                     | 0                         | FAIL                   | NA          | NA        | NA                 | NA          | NA                                                                            | NA         |
| chr16                     | 0                         | FAIL                   | NA          | NA        | NA                 | NA          | NA                                                                            | NA         |
| chr17                     | 1                         | FAIL                   | NA          | NA        | NA                 | NA          | NA                                                                            | NA         |
| chr18:39501001-74069611   | 1                         | FAIL                   | FAIL        | FAIL      | FAIL               | NA          | NA                                                                            | NA         |
| chr19                     | 0                         | FAIL                   | NA          | NA        | NA                 | NA          | NA                                                                            | NA         |
| chr20                     | 0                         | FAIL                   | NA          | NA        | NA                 | NA          | NA                                                                            | NA         |
| chr21                     | 0                         | FAIL                   | NA          | NA        | NA                 | NA          | NA                                                                            | NA         |
| chr22                     | 0                         | FAIL                   | NA          | NA        | NA                 | NA          | NA                                                                            | NA         |
| chrX                      | 0                         | FAIL                   | NA          | NA        | NA                 | NA          | NA                                                                            | NA         |
| chrY                      | 0                         | FAIL                   | NA          | NA        | NA                 | NA          | NA                                                                            | NA         |

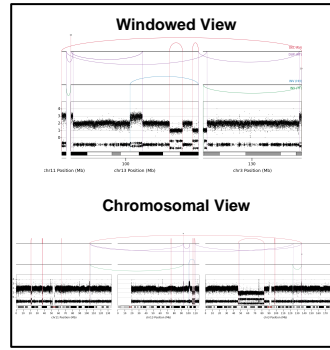

|                          | Total Pass: Chromosome(s) | Window ID with >= 8 SV | Window Join | Window AR | Window Oscillation | Window Type | Window Chain                                    | Overall    |
|--------------------------|---------------------------|------------------------|-------------|-----------|--------------------|-------------|-------------------------------------------------|------------|
| chr1                     | 0                         | FAIL                   | NA          | NA        | NA                 | NA          | NA                                              | NA         |
| chr2                     | 0                         | FAIL                   | NA          | NA        | NA                 | NA          | NA                                              | NA         |
| chr3:5942001-89961651    | 6                         | PASS                   | PASS        | PASS      | PASS               | inter       | NA                                              | Event(CR1) |
| chr3:161515001-194901662 | 6                         | PASS                   | PASS        | PASS      | PASS               | inter       | NA                                              | Event(CR1) |
| chr4                     | 0                         | FAIL                   | NA          | NA        | NA                 | NA          | NA                                              | NA         |
| chr5                     | 0                         | FAIL                   | NA          | NA        | NA                 | NA          | NA                                              | NA         |
| chr6                     | 4                         | FAIL                   | NA          | NA        | NA                 | NA          | NA                                              | NA         |
| chr7                     | 0                         | FAIL                   | NA          | NA        | NA                 | NA          | NA                                              | NA         |
| chr8:33785126-43504000   | 5                         | PASS                   | PASS        | PASS      | FAIL               | chain       | chr18:12829001-19910168, chr8:33785126-43504000 | Event(CR1) |
| chr8:5309522-73186182    | 5                         | PASS                   | PASS        | FAIL      | FAIL               | inter       | NA                                              | NA         |
| chr9:16027001-38057393   | 3                         | FAIL                   | FAIL        | PASS      | PASS               | NA          | NA                                              | NA         |
| chr10:74911274-110823000 | 3                         | FAIL                   | FAIL        | PASS      | PASS               | NA          | NA                                              | NA         |
| chr11                    | 0                         | FAIL                   | NA          | NA        | NA                 | NA          | NA                                              | NA         |
| chr12:33984229-61255159  | 5                         | FAIL                   | FAIL        | FAIL      | FAIL               | NA          | NA                                              | NA         |
| chr12:61591001-61922727  | 5                         | FAIL                   | FAIL        | FAIL      | FAIL               | NA          | NA                                              | NA         |
| chr13                    | 0                         | FAIL                   | NA          | NA        | NA                 | NA          | NA                                              | NA         |
| chr14                    | 0                         | FAIL                   | NA          | NA        | NA                 | NA          | NA                                              | NA         |
| chr15                    | 0                         | FAIL                   | NA          | NA        | NA                 | NA          | NA                                              | NA         |
| chr16                    | 0                         | FAIL                   | NA          | NA        | NA                 | NA          | NA                                              | NA         |
| chr17:14778233-25306237  | 5                         | PASS                   | PASS        | PASS      | FAIL               | inter       | NA                                              | Event(CR1) |
| chr18:12829001-19910168  | 2                         | FAIL                   | FAIL        | FAIL      | FAIL               | chain       | chr18:12829001-19910168, chr8:33785126-43504000 | Event(CR1) |
| chr19                    | 0                         | FAIL                   | NA          | NA        | NA                 | NA          | NA                                              | NA         |
| chr20                    | 0                         | FAIL                   | NA          | NA        | NA                 | NA          | NA                                              | NA         |
| chr21                    | 0                         | FAIL                   | NA          | NA        | NA                 | NA          | NA                                              | NA         |
| chr22                    | 0                         | FAIL                   | NA          | NA        | NA                 | NA          | NA                                              | NA         |
| chrX:25108062-56603146   | 2                         | FAIL                   | PASS        | FAIL      | FAIL               | inter       | NA                                              | NA         |
| chrY                     | 0                         | FAIL                   | NA          | NA        | NA                 | NA          | NA                                              | NA         |

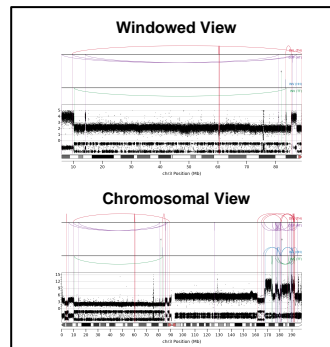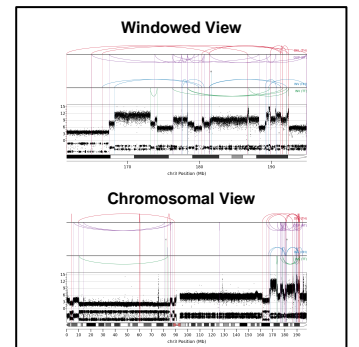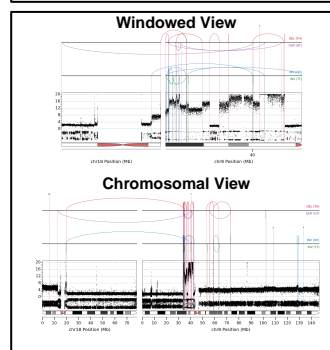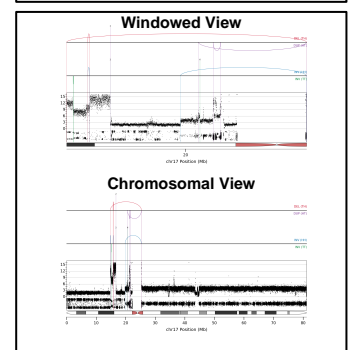

|                          | Total Pass: Chromosome(s) | Window ID with >= 8 SV | Window Join | Window AR | Window Oscillation | Window Type | Window Chain | Overall    |
|--------------------------|---------------------------|------------------------|-------------|-----------|--------------------|-------------|--------------|------------|
| chr1:191310974-191337927 | 3                         | FAIL                   | FAIL        | FAIL      | FAIL               | NA          | NA           | NA         |
| chr2:120512266-120731274 | 4                         | FAIL                   | FAIL        | FAIL      | FAIL               | NA          | NA           | NA         |
| chr3                     | 4                         | FAIL                   | NA          | NA        | NA                 | NA          | NA           | NA         |
| chr4:4527001-44603651    | 4                         | FAIL                   | FAIL        | FAIL      | FAIL               | NA          | NA           | NA         |
| chr5                     | 1                         | FAIL                   | NA          | NA        | NA                 | NA          | NA           | NA         |
| chr6:36457001-36705057   | 6                         | FAIL                   | FAIL        | FAIL      | FAIL               | NA          | NA           | NA         |
| chr6:38429650-40706255   | 6                         | PASS                   | PASS        | PASS      | PASS               | inter       | NA           | Event(CR1) |
| chr7:7848747-17934717    | 3                         | FAIL                   | FAIL        | FAIL      | FAIL               | NA          | NA           | NA         |
| chr7:61953118-149787391  | 3                         | FAIL                   | FAIL        | PASS      | PASS               | NA          | NA           | NA         |
| chr8:37384914-37511000   | 2                         | FAIL                   | FAIL        | FAIL      | FAIL               | NA          | NA           | NA         |
| chr8:55498001-108314521  | 2                         | FAIL                   | FAIL        | FAIL      | FAIL               | NA          | NA           | NA         |
| chr9:74291116-74473491   | 5                         | FAIL                   | FAIL        | FAIL      | FAIL               | NA          | NA           | NA         |
| chr10:260001-23904132    | 6                         | PASS                   | PASS        | PASS      | PASS               | inter       | NA           | Event(CR1) |
| chr11                    | 2                         | FAIL                   | NA          | NA        | NA                 | NA          | NA           | NA         |
| chr12:54064384-121402908 | 6                         | PASS                   | PASS        | PASS      | PASS               | inter       | NA           | Event(CR1) |
| chr13                    | 1                         | FAIL                   | NA          | NA        | NA                 | NA          | NA           | NA         |
| chr14                    | 1                         | FAIL                   | NA          | NA        | NA                 | NA          | NA           | NA         |
| chr15:66920001-67142503  | 0                         | FAIL                   | FAIL        | FAIL      | FAIL               | NA          | NA           | NA         |
| chr16:78651755-78968340  | 1                         | FAIL                   | FAIL        | FAIL      | FAIL               | NA          | NA           | NA         |
| chr17                    | 0                         | FAIL                   | NA          | NA        | NA                 | NA          | NA           | NA         |
| chr18                    | 0                         | FAIL                   | NA          | NA        | NA                 | NA          | NA           | NA         |
| chr19                    | 0                         | FAIL                   | NA          | NA        | NA                 | NA          | NA           | NA         |
| chr20:30889230-31038913  | 1                         | FAIL                   | FAIL        | FAIL      | FAIL               | NA          | NA           | NA         |
| chr21:44946406-45433443  | 2                         | FAIL                   | FAIL        | FAIL      | FAIL               | NA          | NA           | NA         |
| chr22                    | 0                         | FAIL                   | NA          | NA        | NA                 | NA          | NA           | NA         |
| chrX                     | 0                         | FAIL                   | NA          | NA        | NA                 | NA          | NA           | NA         |
| chrY                     | 0                         | FAIL                   | NA          | NA        | NA                 | NA          | NA           | NA         |

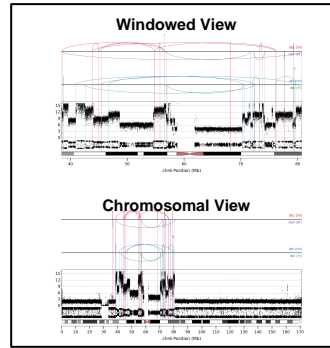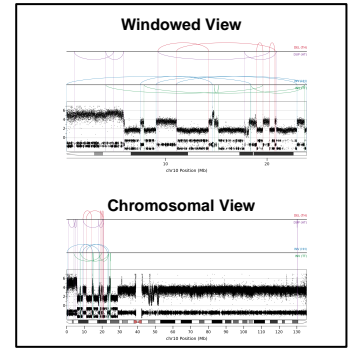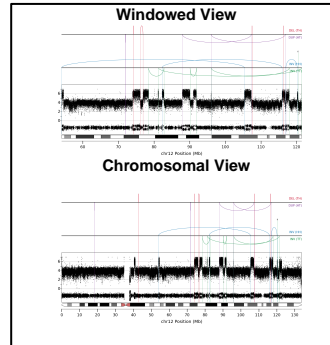

|                          | Total Pass: Chromosome(s) | Window ID with >= 8 SV | Window Join | Window AR | Window Oscillation | Window Type | Window Chain                                      | Overall    |
|--------------------------|---------------------------|------------------------|-------------|-----------|--------------------|-------------|---------------------------------------------------|------------|
| chr1                     | 3                         | FAIL                   | NA          | NA        | NA                 | NA          | NA                                                | NA         |
| chr2:141603001-142150000 | 2                         | FAIL                   | FAIL        | FAIL      | FAIL               | NA          | NA                                                | NA         |
| chr3                     | 3                         | FAIL                   | NA          | NA        | NA                 | NA          | NA                                                | NA         |
| chr4:124701341-124878976 | 2                         | FAIL                   | FAIL        | FAIL      | FAIL               | NA          | NA                                                | NA         |
| chr5                     | 0                         | FAIL                   | NA          | NA        | NA                 | NA          | NA                                                | NA         |
| chr6                     | 2                         | FAIL                   | NA          | NA        | NA                 | NA          | NA                                                | NA         |
| chr7                     | 0                         | FAIL                   | NA          | NA        | NA                 | NA          | NA                                                | NA         |
| chr8:9870062-98888000    | 3                         | FAIL                   | FAIL        | FAIL      | FAIL               | NA          | NA                                                | NA         |
| chr9                     | 1                         | FAIL                   | NA          | NA        | NA                 | NA          | NA                                                | NA         |
| chr10                    | 0                         | FAIL                   | NA          | NA        | NA                 | NA          | NA                                                | NA         |
| chr11:85141122-85368000  | 1                         | FAIL                   | FAIL        | FAIL      | inter              | NA          | NA                                                | NA         |
| chr12:6787814-132455367  | 6                         | PASS                   | PASS        | PASS      | PASS               | inter       | NA                                                | Event(CR1) |
| chr13:48852855-96438919  | 2                         | FAIL                   | PASS        | FAIL      | FAIL               | chain       | chr13:48852855-96438919, chr14:65671940-100468137 | NA         |
| chr14:65671940-100468137 | 2                         | FAIL                   | PASS        | FAIL      | FAIL               | chain       | chr13:48852855-96438919, chr14:65671940-100468137 | NA         |
| chr15                    | 0                         | FAIL                   | NA          | NA        | NA                 | NA          | NA                                                | NA         |
| chr16                    | 1                         | FAIL                   | NA          | NA        | NA                 | NA          | NA                                                | NA         |
| chr17                    | 1                         | FAIL                   | NA          | NA        | NA                 | NA          | NA                                                | NA         |
| chr18                    | 0                         | FAIL                   | NA          | NA        | NA                 | NA          | NA                                                | NA         |
| chr19:54029751-57771486  | 3                         | FAIL                   | FAIL        | FAIL      | FAIL               | NA          | NA                                                | NA         |
| chr20                    | 0                         | FAIL                   | NA          | NA        | NA                 | NA          | NA                                                | NA         |
| chr21                    | 0                         | FAIL                   | NA          | NA        | NA                 | NA          | NA                                                | NA         |
| chr22                    | 2                         | FAIL                   | NA          | NA        | NA                 | NA          | NA                                                | NA         |
| chrX                     | 0                         | FAIL                   | NA          | NA        | NA                 | NA          | NA                                                | NA         |
| chrY                     | 0                         | FAIL                   | NA          | NA        | NA                 | NA          | NA                                                | NA         |

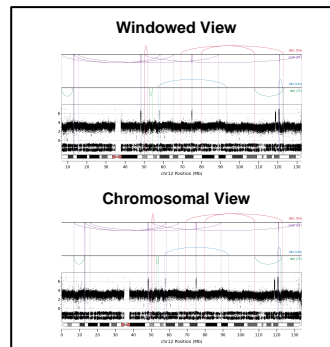

|                        | Total Pass: Chromosome(%) | Window ID with >= 8 SV | Window Join | Window AR | Window Oscillation | Window Type | Window Chain | Overall    |
|------------------------|---------------------------|------------------------|-------------|-----------|--------------------|-------------|--------------|------------|
| chr1                   | 0                         | FAIL                   | NA          | NA        | NA                 | NA          | NA           | NA         |
| chr2                   | 0                         | FAIL                   | NA          | NA        | NA                 | NA          | NA           | NA         |
| chr3                   | 0                         | FAIL                   | NA          | NA        | NA                 | NA          | NA           | NA         |
| chr4                   | 0                         | FAIL                   | NA          | NA        | NA                 | NA          | NA           | NA         |
| chr5                   | 0                         | FAIL                   | NA          | NA        | NA                 | NA          | NA           | NA         |
| chr6:22425001-92870609 | 6                         | PASS                   | PASS        | PASS      | PASS               | inter       | NA           | Event(CR1) |
| chr7                   | 0                         | FAIL                   | NA          | NA        | NA                 | NA          | NA           | NA         |
| chr8                   | 0                         | FAIL                   | NA          | NA        | NA                 | NA          | NA           | NA         |
| chr9                   | 0                         | FAIL                   | NA          | NA        | NA                 | NA          | NA           | NA         |
| chr10                  | 0                         | FAIL                   | NA          | NA        | NA                 | NA          | NA           | NA         |
| chr11                  | 0                         | FAIL                   | NA          | NA        | NA                 | NA          | NA           | NA         |
| chr12                  | 0                         | FAIL                   | NA          | NA        | NA                 | NA          | NA           | NA         |
| chr13                  | 0                         | FAIL                   | NA          | NA        | NA                 | NA          | NA           | NA         |
| chr14                  | 0                         | FAIL                   | NA          | NA        | NA                 | NA          | NA           | NA         |
| chr15                  | 0                         | FAIL                   | NA          | NA        | NA                 | NA          | NA           | NA         |
| chr16                  | 0                         | FAIL                   | NA          | NA        | NA                 | NA          | NA           | NA         |
| chr17                  | 0                         | FAIL                   | NA          | NA        | NA                 | NA          | NA           | NA         |
| chr18                  | 0                         | FAIL                   | NA          | NA        | NA                 | NA          | NA           | NA         |
| chr19:7096101-27775515 | 1                         | FAIL                   | FAIL        | FAIL      | FAIL               | NA          | NA           | NA         |
| chr20                  | 0                         | FAIL                   | NA          | NA        | NA                 | NA          | NA           | NA         |
| chr21                  | 0                         | FAIL                   | NA          | NA        | NA                 | NA          | NA           | NA         |
| chr22                  | 0                         | FAIL                   | NA          | NA        | NA                 | NA          | NA           | NA         |
| chrX                   | 0                         | FAIL                   | NA          | NA        | NA                 | NA          | NA           | NA         |
| chrY                   | 0                         | FAIL                   | NA          | NA        | NA                 | NA          | NA           | NA         |

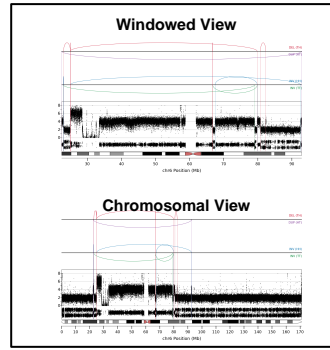

|                          | Total Pass: Chromosome(%) | Window ID with >= 8 SV | Window Join | Window AR | Window Oscillation | Window Type | Window Chain                                                                                                              | Overall    |
|--------------------------|---------------------------|------------------------|-------------|-----------|--------------------|-------------|---------------------------------------------------------------------------------------------------------------------------|------------|
| chr1                     | 0                         | FAIL                   | NA          | NA        | NA                 | NA          | NA                                                                                                                        | NA         |
| chr2                     | 0                         | FAIL                   | NA          | NA        | NA                 | NA          | NA                                                                                                                        | NA         |
| chr3                     | 0                         | FAIL                   | NA          | NA        | NA                 | NA          | NA                                                                                                                        | NA         |
| chr4                     | 2                         | FAIL                   | NA          | NA        | NA                 | NA          | NA                                                                                                                        | NA         |
| chr5                     | 0                         | FAIL                   | NA          | NA        | NA                 | NA          | NA                                                                                                                        | NA         |
| chr6:63093814-158127040  | 6                         | PASS                   | PASS        | PASS      | PASS               | chain       | chr12:2049001-132452607, chr15:20937454-102512224, chr21:15645666-42300116, chr6:63093814-158127040, chr8:153382-24991000 | Event(CR1) |
| chr7:32686530-32696000   | 6                         | FAIL                   | FAIL        | FAIL      | FAIL               | NA          | NA                                                                                                                        | NA         |
| chr7:37823001-158416032  | 6                         | PASS                   | PASS        | PASS      | PASS               | chain       | chr18:27756642-27775389, chr7:37823001-158416032                                                                          | Event(CR1) |
| chr8:153382-24991000     | 4                         | FAIL                   | PASS        | PASS      | FAIL               | chain       | chr12:2049001-132452607, chr15:20937454-102512224, chr21:15645666-42300116, chr6:63093814-158127040, chr8:153382-24991000 | Event(CR1) |
| chr9                     | 0                         | FAIL                   | NA          | NA        | NA                 | NA          | NA                                                                                                                        | NA         |
| chr10                    | 0                         | FAIL                   | NA          | NA        | NA                 | NA          | NA                                                                                                                        | NA         |
| chr11                    | 0                         | FAIL                   | NA          | NA        | NA                 | NA          | NA                                                                                                                        | NA         |
| chr12:2049001-132452607  | 5                         | PASS                   | PASS        | PASS      | PASS               | chain       | chr12:2049001-132452607, chr15:20937454-102512224, chr21:15645666-42300116, chr6:63093814-158127040, chr8:153382-24991000 | Event(CR1) |
| chr13                    | 0                         | FAIL                   | NA          | NA        | NA                 | NA          | NA                                                                                                                        | NA         |
| chr14                    | 0                         | FAIL                   | NA          | NA        | NA                 | NA          | NA                                                                                                                        | NA         |
| chr15:20937454-102512224 | 6                         | PASS                   | PASS        | PASS      | PASS               | chain       | chr12:2049001-132452607, chr15:20937454-102512224, chr21:15645666-42300116, chr6:63093814-158127040, chr8:153382-24991000 | Event(CR1) |
| chr16                    | 0                         | FAIL                   | NA          | NA        | NA                 | NA          | NA                                                                                                                        | NA         |
| chr17                    | 2                         | FAIL                   | NA          | NA        | NA                 | NA          | NA                                                                                                                        | NA         |
| chr18:27756642-27775389  | 6                         | FAIL                   | FAIL        | FAIL      | FAIL               | chain       | chr18:27756642-27775389, chr7:37823001-158416032                                                                          | Event(CR1) |
| chr18:29879708-75377000  | 6                         | PASS                   | PASS        | PASS      | PASS               | inter       | NA                                                                                                                        | Event(CR1) |
| chr19                    | 0                         | FAIL                   | NA          | NA        | NA                 | NA          | NA                                                                                                                        | NA         |
| chr20                    | 0                         | FAIL                   | NA          | NA        | NA                 | NA          | NA                                                                                                                        | NA         |
| chr21:15645666-42300116  | 5                         | PASS                   | PASS        | PASS      | FAIL               | chain       | chr12:2049001-132452607, chr15:20937454-102512224, chr21:15645666-42300116, chr6:63093814-158127040, chr8:153382-24991000 | Event(CR1) |
| chr22                    | 0                         | FAIL                   | NA          | NA        | NA                 | NA          | NA                                                                                                                        | NA         |
| chrX                     | 0                         | FAIL                   | NA          | NA        | NA                 | NA          | NA                                                                                                                        | NA         |
| chrY                     | 0                         | FAIL                   | NA          | NA        | NA                 | NA          | NA                                                                                                                        | NA         |

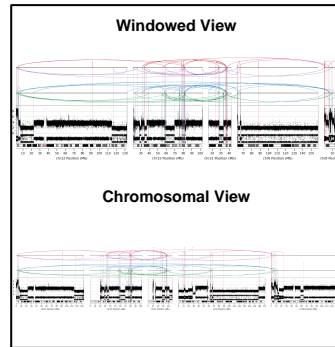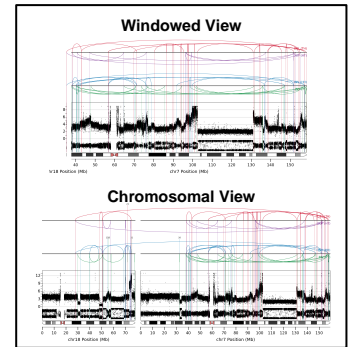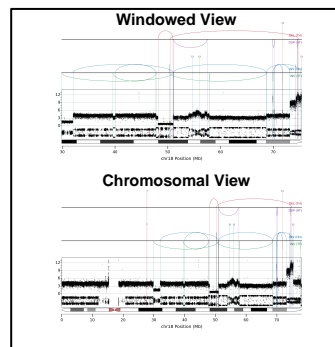

|                         | Total Pass: Chromosome(s) | Window ID with >= 8 SV | Window Join | Window AR | Window Oscillation | Window Type | Window Chain                                                             | Overall    |
|-------------------------|---------------------------|------------------------|-------------|-----------|--------------------|-------------|--------------------------------------------------------------------------|------------|
| chr1:6585984-244736597  | 6                         | PASS                   | PASS        | PASS      | PKSS               | chain       | chr1:6585984-244736597, chr4:92173684-175718413, chr8:12443819-142219000 | Event(CR1) |
| chr2                    | 0                         | FAIL                   | NA          | NA        | NA                 | NA          | NA                                                                       | NA         |
| chr3:29119145-156171063 | 0                         | FAIL                   | FAIL        | FAIL      | FAIL               | NA          | NA                                                                       | NA         |
| chr4:92173684-175718413 | 5                         | PASS                   | PASS        | PASS      | PASS               | chain       | chr1:6585984-244736597, chr4:92173684-175718413, chr8:12443819-142219000 | Event(CR1) |
| chr5                    | 0                         | FAIL                   | NA          | NA        | NA                 | NA          | NA                                                                       | NA         |
| chr6                    | 0                         | FAIL                   | NA          | NA        | NA                 | NA          | NA                                                                       | NA         |
| chr7                    | 0                         | FAIL                   | NA          | NA        | NA                 | NA          | NA                                                                       | NA         |
| chr8:12443819-142219000 | 6                         | PASS                   | PASS        | PASS      | PKSS               | chain       | chr1:6585984-244736597, chr4:92173684-175718413, chr8:12443819-142219000 | Event(CR1) |
| chr9:26931539-31102000  | 2                         | FAIL                   | FAIL        | FAIL      | FAIL               | NA          | NA                                                                       | NA         |
| chr10                   | 0                         | FAIL                   | NA          | NA        | NA                 | NA          | NA                                                                       | NA         |
| chr11                   | 0                         | FAIL                   | NA          | NA        | NA                 | NA          | NA                                                                       | NA         |
| chr12                   | 0                         | FAIL                   | NA          | NA        | NA                 | NA          | NA                                                                       | NA         |
| chr13                   | 0                         | FAIL                   | NA          | NA        | NA                 | NA          | NA                                                                       | NA         |
| chr14                   | 0                         | FAIL                   | NA          | NA        | NA                 | NA          | NA                                                                       | NA         |
| chr15                   | 0                         | FAIL                   | NA          | NA        | NA                 | NA          | NA                                                                       | NA         |
| chr16                   | 1                         | FAIL                   | NA          | NA        | NA                 | NA          | NA                                                                       | NA         |
| chr17                   | 0                         | FAIL                   | NA          | NA        | NA                 | NA          | NA                                                                       | NA         |
| chr18:11882405-25374000 | 3                         | FAIL                   | FAIL        | PKSS      | PKSS               | NA          | NA                                                                       | NA         |
| chr19                   | 0                         | FAIL                   | NA          | NA        | NA                 | NA          | NA                                                                       | NA         |
| chr20                   | 0                         | FAIL                   | NA          | NA        | NA                 | NA          | NA                                                                       | NA         |
| chr21                   | 0                         | FAIL                   | NA          | NA        | NA                 | NA          | NA                                                                       | NA         |
| chr22                   | 0                         | FAIL                   | NA          | NA        | NA                 | NA          | NA                                                                       | NA         |
| chrX                    | 1                         | FAIL                   | NA          | NA        | NA                 | NA          | NA                                                                       | NA         |
| chrY                    | 0                         | FAIL                   | NA          | NA        | NA                 | NA          | NA                                                                       | NA         |

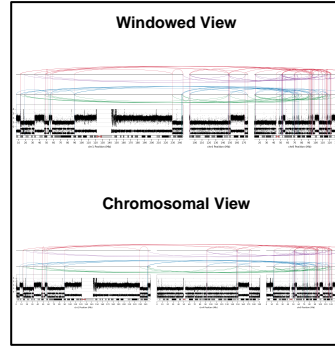

|                          | Total Pass: Chromosome(s) | Window ID with >= 8 SV | Window Join | Window AR | Window Oscillation | Window Type | Window Chain                                     | Overall    |
|--------------------------|---------------------------|------------------------|-------------|-----------|--------------------|-------------|--------------------------------------------------|------------|
| chr1                     | 0                         | FAIL                   | NA          | NA        | NA                 | NA          | NA                                               | NA         |
| chr2:1819709-4528064     | 2                         | FAIL                   | FAIL        | FAIL      | FAIL               | NA          | NA                                               | NA         |
| chr2:190434562-190446738 | 2                         | FAIL                   | FAIL        | FAIL      | FAIL               | chain       | chr2:190434562-190446738, chr8:44454055-71075000 | Event(CR1) |
| chr3                     | 0                         | FAIL                   | NA          | NA        | NA                 | NA          | NA                                               | NA         |
| chr4                     | 0                         | FAIL                   | NA          | NA        | NA                 | NA          | NA                                               | NA         |
| chr5:491001-46343941     | 6                         | PASS                   | PASS        | PASS      | PKSS               | inter       | NA                                               | Event(CR1) |
| chr6:44454055-71075000   | 6                         | PASS                   | PASS        | PASS      | PKSS               | chain       | chr2:190434562-190446738, chr8:44454055-71075000 | Event(CR1) |
| chr7                     | 0                         | FAIL                   | NA          | NA        | NA                 | NA          | NA                                               | NA         |
| chr8                     | 2                         | FAIL                   | NA          | NA        | NA                 | NA          | NA                                               | NA         |
| chr9                     | 0                         | FAIL                   | NA          | NA        | NA                 | NA          | NA                                               | NA         |
| chr10                    | 0                         | FAIL                   | NA          | NA        | NA                 | NA          | NA                                               | NA         |
| chr11:27234966-27505000  | 0                         | FAIL                   | FAIL        | FAIL      | FAIL               | NA          | NA                                               | NA         |
| chr12                    | 0                         | FAIL                   | NA          | NA        | NA                 | NA          | NA                                               | NA         |
| chr13                    | 0                         | FAIL                   | NA          | NA        | NA                 | NA          | NA                                               | NA         |
| chr14                    | 0                         | FAIL                   | NA          | NA        | NA                 | NA          | NA                                               | NA         |
| chr15                    | 0                         | FAIL                   | NA          | NA        | NA                 | NA          | NA                                               | NA         |
| chr16                    | 0                         | FAIL                   | NA          | NA        | NA                 | NA          | NA                                               | NA         |
| chr17:15906810-60766474  | 0                         | FAIL                   | FAIL        | FAIL      | FAIL               | NA          | NA                                               | NA         |
| chr18                    | 0                         | FAIL                   | NA          | NA        | NA                 | NA          | NA                                               | NA         |
| chr19                    | 0                         | FAIL                   | NA          | NA        | NA                 | NA          | NA                                               | NA         |
| chr20                    | 0                         | FAIL                   | NA          | NA        | NA                 | NA          | NA                                               | NA         |
| chr21:15773949-41006313  | 5                         | PASS                   | PASS        | PASS      | FAIL               | chain       | chr21:15773949-41006313, chrX:63926388-154855088 | Event(CR1) |
| chr22                    | 0                         | FAIL                   | NA          | NA        | NA                 | NA          | NA                                               | NA         |
| chrX:63926388-154855088  | 0                         | FAIL                   | FAIL        | FAIL      | FAIL               | chain       | chr21:15773949-41006313, chrX:63926388-154855088 | Event(CR1) |
| chrY                     | 0                         | FAIL                   | NA          | NA        | NA                 | NA          | NA                                               | NA         |

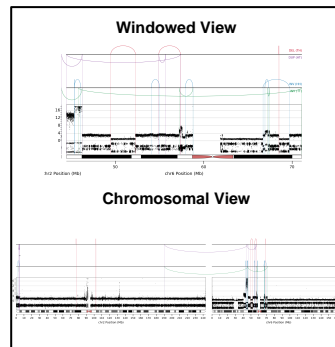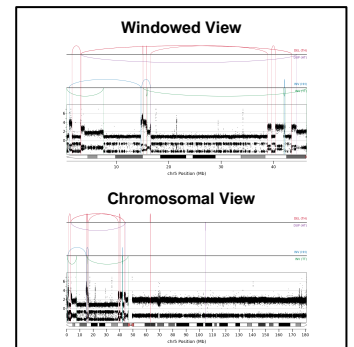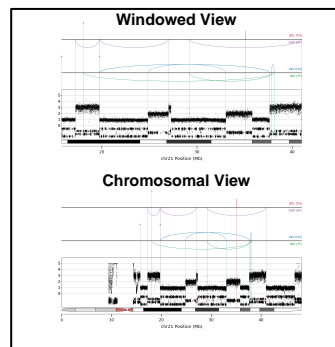

|                          | Total Pass: Chromosome(s) | Window ID with >= 8 SV | Window Join | Window AR | Window Oscillation | Window Type | Window Chain                                   | Overall    |
|--------------------------|---------------------------|------------------------|-------------|-----------|--------------------|-------------|------------------------------------------------|------------|
| chr1                     | 2                         | FAIL                   | NA          | NA        | NA                 | NA          | NA                                             | NA         |
| chr2:198478911-199273179 | 5                         | FAIL                   | FAIL        | FAIL      | FAIL               | NA          | NA                                             | NA         |
| chr3:15327330-15422111   | 4                         | FAIL                   | FAIL        | FAIL      | FAIL               | NA          | NA                                             | NA         |
| chr3:22328792-31869610   | 4                         | FAIL                   | FAIL        | FAIL      | FAIL               | NA          | NA                                             | NA         |
| chr4                     | 4                         | FAIL                   | NA          | NA        | NA                 | NA          | NA                                             | NA         |
| chr5:79030001-99593241   | 3                         | FAIL                   | PASS        | FAIL      | FAIL               | NA          | NA                                             | NA         |
| chr6                     | 2                         | FAIL                   | NA          | NA        | NA                 | NA          | NA                                             | NA         |
| chr7                     | 1                         | FAIL                   | NA          | NA        | NA                 | NA          | NA                                             | NA         |
| chr8                     | 0                         | FAIL                   | NA          | NA        | NA                 | NA          | NA                                             | NA         |
| chr9:1859001-27143000    | 4                         | FAIL                   | PASS        | FAIL      | FAIL               | chain       | chr18:39432001-43433270, chr9:1859001-27143000 | NA         |
| chr10                    | 1                         | FAIL                   | NA          | NA        | NA                 | NA          | NA                                             | NA         |
| chr11                    | 2                         | FAIL                   | NA          | NA        | NA                 | NA          | NA                                             | NA         |
| chr12                    | 0                         | FAIL                   | NA          | NA        | NA                 | NA          | NA                                             | NA         |
| chr13:19818766-23944483  | 6                         | PASS                   | PASS        | PASS      | PASS               | inter       | NA                                             | Event(CR1) |
| chr13:34485466-34921013  | 6                         | FAIL                   | FAIL        | FAIL      | FAIL               | NA          | NA                                             | NA         |
| chr14                    | 0                         | FAIL                   | NA          | NA        | NA                 | NA          | NA                                             | NA         |
| chr15                    | 0                         | FAIL                   | NA          | NA        | NA                 | NA          | NA                                             | NA         |
| chr16                    | 0                         | FAIL                   | NA          | NA        | NA                 | NA          | NA                                             | NA         |
| chr17                    | 0                         | FAIL                   | NA          | NA        | NA                 | NA          | NA                                             | NA         |
| chr18:39432001-43433270  | 0                         | FAIL                   | FAIL        | FAIL      | FAIL               | chain       | chr18:39432001-43433270, chr9:1859001-27143000 | NA         |
| chr19                    | 0                         | FAIL                   | NA          | NA        | NA                 | NA          | NA                                             | NA         |
| chr20                    | 0                         | FAIL                   | NA          | NA        | NA                 | NA          | NA                                             | NA         |
| chr21                    | 0                         | FAIL                   | NA          | NA        | NA                 | NA          | NA                                             | NA         |
| chr22                    | 0                         | FAIL                   | NA          | NA        | NA                 | NA          | NA                                             | NA         |
| chrX                     | 0                         | FAIL                   | NA          | NA        | NA                 | NA          | NA                                             | NA         |
| chrY                     | 0                         | FAIL                   | NA          | NA        | NA                 | NA          | NA                                             | NA         |

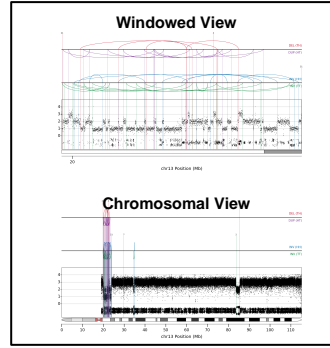

|                         | Total Pass: Chromosome(s) | Window ID with >= 8 SV | Window Join | Window AR | Window Oscillation | Window Type | Window Chain                                     | Overall    |
|-------------------------|---------------------------|------------------------|-------------|-----------|--------------------|-------------|--------------------------------------------------|------------|
| chr1                    | 0                         | FAIL                   | NA          | NA        | NA                 | NA          | NA                                               | NA         |
| chr2                    | 0                         | FAIL                   | NA          | NA        | NA                 | NA          | NA                                               | NA         |
| chr3                    | 0                         | FAIL                   | NA          | NA        | NA                 | NA          | NA                                               | NA         |
| chr4                    | 3                         | FAIL                   | NA          | NA        | NA                 | NA          | NA                                               | NA         |
| chr5                    | 0                         | FAIL                   | NA          | NA        | NA                 | NA          | NA                                               | NA         |
| chr6                    | 0                         | FAIL                   | NA          | NA        | NA                 | NA          | NA                                               | NA         |
| chr7                    | 0                         | FAIL                   | NA          | NA        | NA                 | NA          | NA                                               | NA         |
| chr8                    | 0                         | FAIL                   | NA          | NA        | NA                 | NA          | NA                                               | NA         |
| chr9                    | 0                         | FAIL                   | NA          | NA        | NA                 | NA          | NA                                               | NA         |
| chr10                   | 0                         | FAIL                   | NA          | NA        | NA                 | NA          | NA                                               | NA         |
| chr11                   | 0                         | FAIL                   | NA          | NA        | NA                 | NA          | NA                                               | NA         |
| chr12                   | 0                         | FAIL                   | NA          | NA        | NA                 | NA          | NA                                               | NA         |
| chr13                   | 0                         | FAIL                   | NA          | NA        | NA                 | NA          | NA                                               | NA         |
| chr14                   | 0                         | FAIL                   | NA          | NA        | NA                 | NA          | NA                                               | NA         |
| chr15                   | 0                         | FAIL                   | NA          | NA        | NA                 | NA          | NA                                               | NA         |
| chr16                   | 0                         | FAIL                   | NA          | NA        | NA                 | NA          | NA                                               | NA         |
| chr17                   | 3                         | FAIL                   | NA          | NA        | NA                 | NA          | NA                                               | NA         |
| chr18:19689956-30495013 | 6                         | PASS                   | PASS        | PASS      | PASS               | chain       | chr18:19689956-30495013, chr21:23068555-43836118 | Event(CR1) |
| chr19                   | 0                         | FAIL                   | NA          | NA        | NA                 | NA          | NA                                               | NA         |
| chr20                   | 0                         | FAIL                   | NA          | NA        | NA                 | NA          | NA                                               | NA         |
| chr21:17418001-19954878 | 6                         | FAIL                   | FAIL        | FAIL      | PASS               | NA          | NA                                               | NA         |
| chr21:23068555-43836118 | 6                         | PASS                   | PASS        | PASS      | PASS               | chain       | chr18:19689956-30495013, chr21:23068555-43836118 | Event(CR1) |
| chr22                   | 0                         | FAIL                   | NA          | NA        | NA                 | NA          | NA                                               | NA         |
| chrX                    | 0                         | FAIL                   | NA          | NA        | NA                 | NA          | NA                                               | NA         |
| chrY                    | 0                         | FAIL                   | NA          | NA        | NA                 | NA          | NA                                               | NA         |

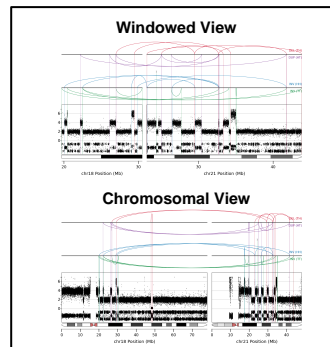



|                           | Total Pass: Chromosome(s) | Window ID with >= 8 SV | Window Join | Window AR | Window Oscillation | Window Type | Window Chain                                        | Overall    |
|---------------------------|---------------------------|------------------------|-------------|-----------|--------------------|-------------|-----------------------------------------------------|------------|
| chr1                      | 3                         | FAIL                   | NA          | NA        | NA                 | NA          | NA                                                  | NA         |
| chr2:108043251-124391011  | 3                         | FAIL                   | FAIL        | FAIL      | FAIL               | NA          | NA                                                  | NA         |
| chr2:142658470-231054841  | 3                         | FAIL                   | PASS        | FAIL      | FAIL               | inter       | NA                                                  | NA         |
| chr3:112287797-112300804  | 3                         | FAIL                   | FAIL        | FAIL      | FAIL               | chain       | chr11:127710316-131214077, chr3:112287797-112300804 | NA         |
| chr4:59121561-59386000    | 5                         | FAIL                   | FAIL        | FAIL      | FAIL               | NA          | NA                                                  | NA         |
| chr4:67443001-187141000   | 5                         | PASS                   | FAIL        | PASS      | PASS               | inter       | NA                                                  | Event(CR2) |
| chr5:2309912-2342023      | 4                         | FAIL                   | PASS        | FAIL      | FAIL               | NA          | NA                                                  | NA         |
| chr5:53812123-78866929    | 4                         | FAIL                   | FAIL        | PASS      | FAIL               | inter       | NA                                                  | NA         |
| chr6                      | 5                         | FAIL                   | NA          | NA        | NA                 | NA          | NA                                                  | NA         |
| chr7:129397032-129633634  | 2                         | FAIL                   | FAIL        | FAIL      | FAIL               | NA          | NA                                                  | NA         |
| chr7:158071107-157576329  | 2                         | FAIL                   | FAIL        | FAIL      | FAIL               | NA          | NA                                                  | NA         |
| chr8:130752639-130767164  | 2                         | FAIL                   | FAIL        | FAIL      | FAIL               | chain       | chr12:34053222-90714380, chr8:130752639-130767164   | NA         |
| chr9                      | 3                         | FAIL                   | NA          | NA        | NA                 | NA          | NA                                                  | NA         |
| chr10                     | 2                         | FAIL                   | NA          | NA        | NA                 | NA          | NA                                                  | NA         |
| chr11:37127426-41223136   | 3                         | FAIL                   | FAIL        | FAIL      | FAIL               | NA          | NA                                                  | NA         |
| chr11:127710316-131214077 | 3                         | FAIL                   | FAIL        | FAIL      | FAIL               | chain       | chr11:127710316-131214077, chr3:112287797-112300804 | NA         |
| chr12:34053222-90714380   | 2                         | FAIL                   | PASS        | FAIL      | FAIL               | chain       | chr12:34053222-90714380, chr8:130752639-130767164   | NA         |
| chr13:8697001-91883087    | 1                         | FAIL                   | FAIL        | FAIL      | FAIL               | NA          | NA                                                  | NA         |
| chr14                     | 0                         | FAIL                   | NA          | NA        | NA                 | NA          | NA                                                  | NA         |
| chr15:84172692-84283076   | 3                         | FAIL                   | FAIL        | FAIL      | FAIL               | NA          | NA                                                  | NA         |
| chr16                     | 3                         | FAIL                   | NA          | NA        | NA                 | NA          | NA                                                  | NA         |
| chr17:47068795-67727021   | 0                         | FAIL                   | FAIL        | FAIL      | FAIL               | NA          | NA                                                  | NA         |
| chr18:19709355-74084000   | 6                         | PASS                   | PASS        | PASS      | PASS               | inter       | NA                                                  | Event(CR1) |
| chr19                     | 0                         | FAIL                   | NA          | NA        | NA                 | NA          | NA                                                  | NA         |
| chr20                     | 0                         | FAIL                   | NA          | NA        | NA                 | NA          | NA                                                  | NA         |
| chr21                     | 0                         | FAIL                   | NA          | NA        | NA                 | NA          | NA                                                  | NA         |
| chr22                     | 0                         | FAIL                   | NA          | NA        | NA                 | NA          | NA                                                  | NA         |
| chrX                      | 0                         | FAIL                   | NA          | NA        | NA                 | NA          | NA                                                  | NA         |
| chrY                      | 0                         | FAIL                   | NA          | NA        | NA                 | NA          | NA                                                  | NA         |

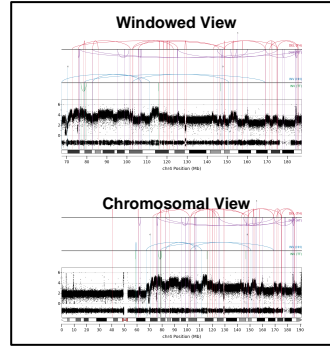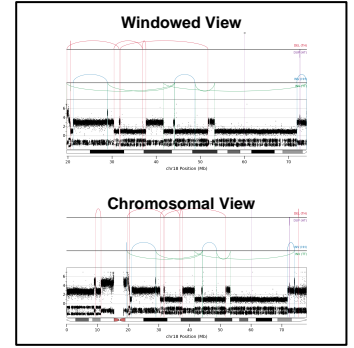

|                           | Total Pass: Chromosome(s) | Window ID with >= 8 SV | Window Join | Window AR | Window Oscillation | Window Type | Window Chain                                                              | Overall    |
|---------------------------|---------------------------|------------------------|-------------|-----------|--------------------|-------------|---------------------------------------------------------------------------|------------|
| chr1:28699267-229430158   | 6                         | PASS                   | PASS        | PASS      | FAIL               | chain       | chr11:61364001-61635890, chr1:28699267-229430158, chr3:27598784-169520086 | Event(CR1) |
| chr2                      | 0                         | FAIL                   | NA          | NA        | NA                 | NA          | NA                                                                        | NA         |
| chr3:27598784-169520086   | 3                         | FAIL                   | FAIL        | PASS      | PASS               | chain       | chr11:61364001-61635890, chr1:28699267-229430158, chr3:27598784-169520086 | Event(CR1) |
| chr4                      | 0                         | FAIL                   | NA          | NA        | NA                 | NA          | NA                                                                        | NA         |
| chr5                      | 0                         | FAIL                   | NA          | NA        | NA                 | NA          | NA                                                                        | NA         |
| chr6                      | 0                         | FAIL                   | NA          | NA        | NA                 | NA          | NA                                                                        | NA         |
| chr7                      | 0                         | FAIL                   | NA          | NA        | NA                 | NA          | NA                                                                        | NA         |
| chr8                      | 1                         | FAIL                   | NA          | NA        | NA                 | NA          | NA                                                                        | NA         |
| chr9                      | 2                         | FAIL                   | NA          | NA        | NA                 | NA          | NA                                                                        | NA         |
| chr10:126845447-127083177 | 3                         | FAIL                   | PASS        | FAIL      | FAIL               | inter       | NA                                                                        | NA         |
| chr11:61364001-61635890   | 0                         | FAIL                   | FAIL        | FAIL      | FAIL               | chain       | chr11:61364001-61635890, chr1:28699267-229430158, chr3:27598784-169520086 | Event(CR1) |
| chr12                     | 0                         | FAIL                   | NA          | NA        | NA                 | NA          | NA                                                                        | NA         |
| chr13                     | 0                         | FAIL                   | NA          | NA        | NA                 | NA          | NA                                                                        | NA         |
| chr14                     | 0                         | FAIL                   | NA          | NA        | NA                 | NA          | NA                                                                        | NA         |
| chr15                     | 0                         | FAIL                   | NA          | NA        | NA                 | NA          | NA                                                                        | NA         |
| chr16                     | 0                         | FAIL                   | NA          | NA        | NA                 | NA          | NA                                                                        | NA         |
| chr17                     | 0                         | FAIL                   | NA          | NA        | NA                 | NA          | NA                                                                        | NA         |
| chr18:12570001-14837210   | 5                         | FAIL                   | FAIL        | FAIL      | FAIL               | NA          | NA                                                                        | NA         |
| chr18:21926931-22135000   | 5                         | FAIL                   | FAIL        | FAIL      | FAIL               | NA          | NA                                                                        | NA         |
| chr19                     | 0                         | FAIL                   | NA          | NA        | NA                 | NA          | NA                                                                        | NA         |
| chr20                     | 0                         | FAIL                   | NA          | NA        | NA                 | NA          | NA                                                                        | NA         |
| chr21                     | 0                         | FAIL                   | NA          | NA        | NA                 | NA          | NA                                                                        | NA         |
| chr22                     | 0                         | FAIL                   | NA          | NA        | NA                 | NA          | NA                                                                        | NA         |
| chrX                      | 0                         | FAIL                   | NA          | NA        | NA                 | NA          | NA                                                                        | NA         |
| chrY                      | 0                         | FAIL                   | NA          | NA        | NA                 | NA          | NA                                                                        | NA         |

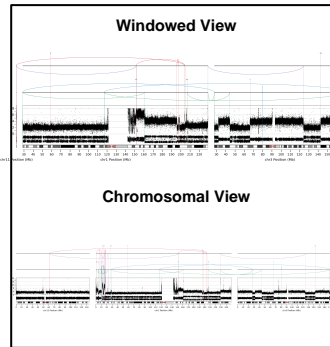

|                           | Total Pass: Chromosome(s) | Window ID with >= 8 SV | Window Join | Window AR | Window Oscillation | Window Type | Window Chain                                     | Overall    |
|---------------------------|---------------------------|------------------------|-------------|-----------|--------------------|-------------|--------------------------------------------------|------------|
| chr1                      | 3                         | FAIL                   | NA          | NA        | NA                 | NA          | NA                                               | NA         |
| chr2                      | 3                         | FAIL                   | NA          | NA        | NA                 | NA          | NA                                               | NA         |
| chr3                      | 0                         | FAIL                   | NA          | NA        | NA                 | NA          | NA                                               | NA         |
| chr4:17492659-188605000   | 5                         | PASS                   | PASS        | PASS      | PASS               | inter       | NA                                               | Event(CR1) |
| chr5                      | 0                         | FAIL                   | NA          | NA        | NA                 | NA          | NA                                               | NA         |
| chr6                      | 4                         | FAIL                   | NA          | NA        | NA                 | NA          | NA                                               | NA         |
| chr7:11066314-11739458    | 5                         | FAIL                   | FAIL        | FAIL      | FAIL               | NA          | NA                                               | NA         |
| chr8                      | 1                         | FAIL                   | NA          | NA        | NA                 | NA          | NA                                               | NA         |
| chr9                      | 0                         | FAIL                   | NA          | NA        | NA                 | NA          | NA                                               | NA         |
| chr10:965893-36433000     | 5                         | FAIL                   | FAIL        | FAIL      | PASS               | chain       | chr10:965893-36433000, chr17:15180001-21908000   | NA         |
| chr10:71072854-102132000  | 5                         | FAIL                   | FAIL        | FAIL      | FAIL               | NA          | NA                                               | NA         |
| chr11                     | 3                         | FAIL                   | NA          | NA        | NA                 | NA          | NA                                               | NA         |
| chr12:53377001-63829533   | 5                         | PASS                   | PASS        | PASS      | PASS               | FAIL        | NA                                               | NA         |
| chr12:79750745-80599600   | 5                         | FAIL                   | FAIL        | FAIL      | FAIL               | NA          | NA                                               | NA         |
| chr13:104383001-108106703 | 0                         | FAIL                   | FAIL        | FAIL      | FAIL               | NA          | NA                                               | NA         |
| chr14:50495917-88279000   | 6                         | PASS                   | PASS        | PASS      | PASS               | chain       | chr14:50495917-88279000, chr16:48397966-81330000 | Event(CR1) |
| chr15                     | 1                         | FAIL                   | NA          | NA        | NA                 | NA          | NA                                               | NA         |
| chr16:48397966-81330000   | 5                         | PASS                   | PASS        | PASS      | PASS               | chain       | chr14:50495917-88279000, chr16:48397966-81330000 | Event(CR1) |
| chr17:15180001-21908000   | 5                         | FAIL                   | PASS        | PASS      | FAIL               | chain       | chr10:965893-36433000, chr17:15180001-21908000   | NA         |
| chr18:24495617-64320000   | 6                         | PASS                   | PASS        | PASS      | PASS               | inter       | NA                                               | Event(CR1) |
| chr19                     | 1                         | FAIL                   | NA          | NA        | NA                 | NA          | NA                                               | NA         |
| chr20                     | 0                         | FAIL                   | NA          | NA        | NA                 | NA          | NA                                               | NA         |
| chr21                     | 0                         | FAIL                   | NA          | NA        | NA                 | NA          | NA                                               | NA         |
| chr22                     | 0                         | FAIL                   | NA          | NA        | NA                 | NA          | NA                                               | NA         |
| chrX:11381212-13301142    | 1                         | FAIL                   | FAIL        | FAIL      | FAIL               | NA          | NA                                               | NA         |
| chrX:4963025-93389108     | 1                         | FAIL                   | FAIL        | FAIL      | FAIL               | NA          | NA                                               | NA         |
| chrY                      | 0                         | FAIL                   | NA          | NA        | NA                 | NA          | NA                                               | NA         |

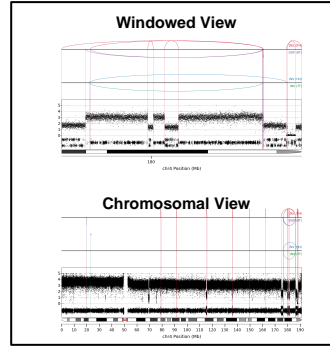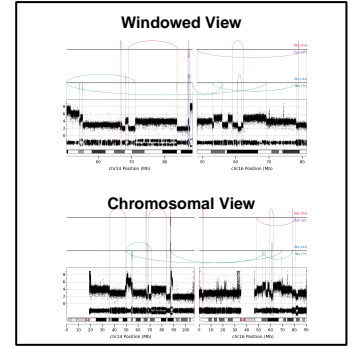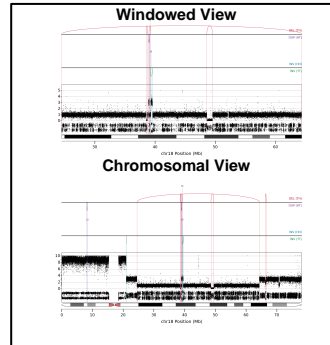

|                         | Total Pass: Chromosome(s) | Window ID with >= 8 SV | Window Join | Window AR | Window Oscillation | Window Type | Window Chain | Overall    |
|-------------------------|---------------------------|------------------------|-------------|-----------|--------------------|-------------|--------------|------------|
| chr1                    | 0                         | FAIL                   | NA          | NA        | NA                 | NA          | NA           | NA         |
| chr2                    | 0                         | FAIL                   | NA          | NA        | NA                 | NA          | NA           | NA         |
| chr3                    | 0                         | FAIL                   | NA          | NA        | NA                 | NA          | NA           | NA         |
| chr4                    | 0                         | FAIL                   | NA          | NA        | NA                 | NA          | NA           | NA         |
| chr5                    | 0                         | FAIL                   | NA          | NA        | NA                 | NA          | NA           | NA         |
| chr6                    | 0                         | FAIL                   | NA          | NA        | NA                 | NA          | NA           | NA         |
| chr7                    | 0                         | FAIL                   | NA          | NA        | NA                 | NA          | NA           | NA         |
| chr8                    | 0                         | FAIL                   | NA          | NA        | NA                 | NA          | NA           | NA         |
| chr9                    | 0                         | FAIL                   | NA          | NA        | NA                 | NA          | NA           | NA         |
| chr10                   | 0                         | FAIL                   | NA          | NA        | NA                 | NA          | NA           | NA         |
| chr11                   | 0                         | FAIL                   | NA          | NA        | NA                 | NA          | NA           | NA         |
| chr12                   | 0                         | FAIL                   | NA          | NA        | NA                 | NA          | NA           | NA         |
| chr13                   | 0                         | FAIL                   | NA          | NA        | NA                 | NA          | NA           | NA         |
| chr14                   | 0                         | FAIL                   | NA          | NA        | NA                 | NA          | NA           | NA         |
| chr15                   | 2                         | FAIL                   | NA          | NA        | NA                 | NA          | NA           | NA         |
| chr16:27585489-80620710 | 3                         | FAIL                   | FAIL        | PASS      | PASS               | NA          | NA           | NA         |
| chr17                   | 0                         | FAIL                   | NA          | NA        | NA                 | NA          | NA           | NA         |
| chr18                   | 2                         | FAIL                   | NA          | NA        | NA                 | NA          | NA           | NA         |
| chr19:31486617-51372172 | 6                         | PASS                   | PASS        | PASS      | PASS               | inter       | NA           | Event(CR1) |
| chr20                   | 0                         | FAIL                   | NA          | NA        | NA                 | NA          | NA           | NA         |
| chr21                   | 0                         | FAIL                   | NA          | NA        | NA                 | NA          | NA           | NA         |
| chr22:18515809-51142114 | 5                         | PASS                   | PASS        | PASS      | PASS               | inter       | NA           | Event(CR1) |
| chrX                    | 0                         | FAIL                   | NA          | NA        | NA                 | NA          | NA           | NA         |
| chrY                    | 0                         | FAIL                   | NA          | NA        | NA                 | NA          | NA           | NA         |

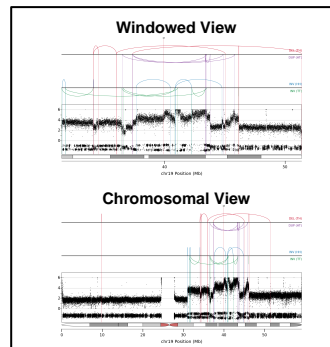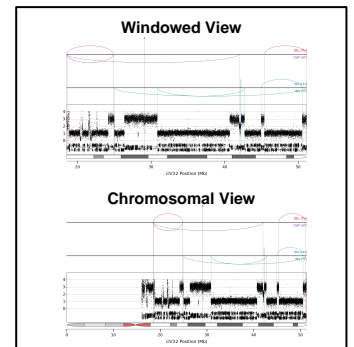

|                          | Total Pass: Chromosome(s) | Window ID with >= 8 SV | Window Join | Window AR | Window Oscillation | Window Type | Window Chain | Overall    |
|--------------------------|---------------------------|------------------------|-------------|-----------|--------------------|-------------|--------------|------------|
| chr1:1574755-3595936     | 3                         | FAIL                   | FAIL        | FAIL      | FAIL               | NA          | NA           | NA         |
| chr2                     | 3                         | FAIL                   | NA          | NA        | NA                 | NA          | NA           | NA         |
| chr3                     | 0                         | FAIL                   | NA          | NA        | NA                 | NA          | NA           | NA         |
| chr4                     | 3                         | FAIL                   | NA          | NA        | NA                 | NA          | NA           | NA         |
| chr5                     | 0                         | FAIL                   | NA          | NA        | NA                 | NA          | NA           | NA         |
| chr6:2643948-161801680   | 5                         | PASS                   | FAIL        | PASS      | PASS               | inter       | NA           | Event(CR2) |
| chr7                     | 0                         | FAIL                   | NA          | NA        | NA                 | NA          | NA           | NA         |
| chr8                     | 0                         | FAIL                   | NA          | NA        | NA                 | NA          | NA           | NA         |
| chr9:12257448-31725169   | 5                         | FAIL                   | PASS        | PASS      | PASS               | inter       | NA           | Event(CR2) |
| chr10                    | 3                         | FAIL                   | NA          | NA        | NA                 | NA          | NA           | NA         |
| chr11:31039155-45142757  | 6                         | PASS                   | PASS        | FAIL      | FAIL               | inter       | NA           | NA         |
| chr11:68056001-122175186 | 6                         | FAIL                   | FAIL        | PASS      | PASS               | inter       | NA           | Event(CR2) |
| chr12                    | 2                         | FAIL                   | NA          | NA        | NA                 | NA          | NA           | NA         |
| chr13:32380051-34992381  | 1                         | FAIL                   | FAIL        | FAIL      | FAIL               | NA          | NA           | NA         |
| chr14                    | 0                         | FAIL                   | NA          | NA        | NA                 | NA          | NA           | NA         |
| chr15                    | 3                         | FAIL                   | NA          | NA        | NA                 | NA          | NA           | NA         |
| chr16                    | 0                         | FAIL                   | NA          | NA        | NA                 | NA          | NA           | NA         |
| chr17:7471759-8159870    | 1                         | FAIL                   | FAIL        | FAIL      | FAIL               | NA          | NA           | NA         |
| chr17:56151806-57435288  | 1                         | FAIL                   | FAIL        | FAIL      | FAIL               | NA          | NA           | NA         |
| chr18                    | 0                         | FAIL                   | NA          | NA        | NA                 | NA          | NA           | NA         |
| chr19                    | 0                         | FAIL                   | NA          | NA        | NA                 | NA          | NA           | NA         |
| chr20                    | 0                         | FAIL                   | NA          | NA        | NA                 | NA          | NA           | NA         |
| chr21                    | 0                         | FAIL                   | NA          | NA        | NA                 | NA          | NA           | NA         |
| chr22                    | 0                         | FAIL                   | NA          | NA        | NA                 | NA          | NA           | NA         |
| chrX                     | 0                         | FAIL                   | NA          | NA        | NA                 | NA          | NA           | NA         |
| chrY                     | 0                         | FAIL                   | NA          | NA        | NA                 | NA          | NA           | NA         |

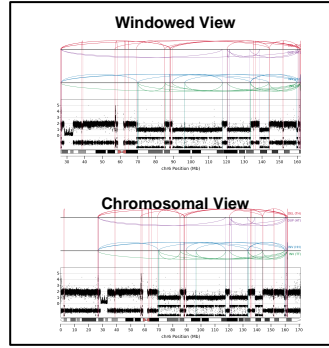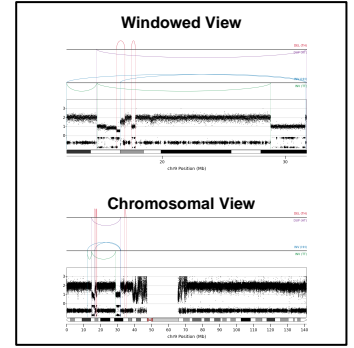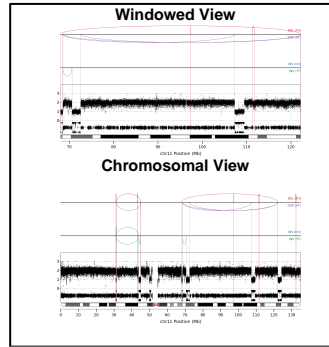

|                         | Total Pass: Chromosome(s) | Window ID with >= 8 SV | Window Join | Window AR | Window Oscillation | Window Type | Window Chain                                                                                                                                      | Overall    |
|-------------------------|---------------------------|------------------------|-------------|-----------|--------------------|-------------|---------------------------------------------------------------------------------------------------------------------------------------------------|------------|
| chr1                    | 0                         | FAIL                   | NA          | NA        | NA                 | NA          | NA                                                                                                                                                | NA         |
| chr2                    | 0                         | FAIL                   | NA          | NA        | NA                 | NA          | NA                                                                                                                                                | NA         |
| chr3:84718681-84838371  | 1                         | FAIL                   | FAIL        | FAIL      | FAIL               | chain       | chr12:24656584-30991444, chr18:1270001-25347900, chr20:20406001-23707633, chr3:84718681-84838371, chr4:55397892-190660873, chr9:17800782-35220174 | Event(CR1) |
| chr4:55397892-190660873 | 2                         | FAIL                   | PASS        | PASS      | FAIL               | chain       | chr12:24656584-30991444, chr18:1270001-25347900, chr20:20406001-23707633, chr3:84718681-84838371, chr4:55397892-190660873, chr9:17800782-35220174 | Event(CR1) |
| chr5                    | 0                         | FAIL                   | NA          | NA        | NA                 | NA          | NA                                                                                                                                                | NA         |
| chr6                    | 0                         | FAIL                   | NA          | NA        | NA                 | NA          | NA                                                                                                                                                | NA         |
| chr7                    | 0                         | FAIL                   | NA          | NA        | NA                 | NA          | NA                                                                                                                                                | NA         |
| chr8:42310317-144319337 | 6                         | PASS                   | FAIL        | PASS      | PASS               | NA          | NA                                                                                                                                                | NA         |
| chr9:17800782-35220174  | 5                         | PASS                   | PASS        | PASS      | PASS               | chain       | chr12:24656584-30991444, chr18:1270001-25347900, chr20:20406001-23707633, chr3:84718681-84838371, chr4:55397892-190660873, chr9:17800782-35220174 | Event(CR1) |
| chr10                   | 0                         | FAIL                   | NA          | NA        | NA                 | NA          | NA                                                                                                                                                | NA         |
| chr11                   | 4                         | FAIL                   | NA          | NA        | NA                 | NA          | NA                                                                                                                                                | NA         |
| chr12:24656584-30991444 | 4                         | FAIL                   | PASS        | PASS      | FAIL               | chain       | chr12:24656584-30991444, chr18:1270001-25347900, chr20:20406001-23707633, chr3:84718681-84838371, chr4:55397892-190660873, chr9:17800782-35220174 | Event(CR1) |
| chr13                   | 0                         | FAIL                   | NA          | NA        | NA                 | NA          | NA                                                                                                                                                | NA         |
| chr14                   | 0                         | FAIL                   | NA          | NA        | NA                 | NA          | NA                                                                                                                                                | NA         |
| chr15                   | 0                         | FAIL                   | NA          | NA        | NA                 | NA          | NA                                                                                                                                                | NA         |
| chr16                   | 0                         | FAIL                   | NA          | NA        | NA                 | NA          | NA                                                                                                                                                | NA         |
| chr17                   | 0                         | FAIL                   | NA          | NA        | NA                 | NA          | NA                                                                                                                                                | NA         |
| chr18:1270001-25347900  | 5                         | PASS                   | PASS        | PASS      | FAIL               | chain       | chr12:24656584-30991444, chr18:1270001-25347900, chr20:20406001-23707633, chr3:84718681-84838371, chr4:55397892-190660873, chr9:17800782-35220174 | Event(CR1) |
| chr19                   | 4                         | FAIL                   | NA          | NA        | NA                 | NA          | NA                                                                                                                                                | NA         |
| chr20:20406001-23707633 | 5                         | FAIL                   | FAIL        | FAIL      | FAIL               | chain       | chr12:24656584-30991444, chr18:1270001-25347900, chr20:20406001-23707633, chr3:84718681-84838371, chr4:55397892-190660873, chr9:17800782-35220174 | Event(CR1) |
| chr21                   | 0                         | FAIL                   | NA          | NA        | NA                 | NA          | NA                                                                                                                                                | NA         |
| chr22                   | 0                         | FAIL                   | NA          | NA        | NA                 | NA          | NA                                                                                                                                                | NA         |
| chrX                    | 0                         | FAIL                   | NA          | NA        | NA                 | NA          | NA                                                                                                                                                | NA         |
| chrY                    | 0                         | FAIL                   | NA          | NA        | NA                 | NA          | NA                                                                                                                                                | NA         |

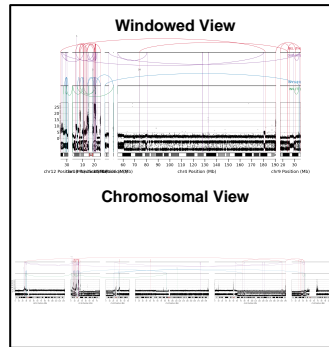

|                           | Total Pass: Chromosome(s) | Window ID with >= 8 SV | Window Join | Window AR | Window Oscillation | Window Type | Window Chain                                                         | Overall    |
|---------------------------|---------------------------|------------------------|-------------|-----------|--------------------|-------------|----------------------------------------------------------------------|------------|
| chr1:9539001-120227000    | 5                         | PASS                   | PASS        | PASS      | PASS               | chain       | chr1:9539001-120227000, chr6:3708179-62124252, chr9:3583986-96148287 | Event(CR1) |
| chr2                      | 0                         | FAIL                   | NA          | NA        | NA                 | NA          | NA                                                                   | NA         |
| chr3                      | 0                         | FAIL                   | NA          | NA        | NA                 | NA          | NA                                                                   | NA         |
| chr4                      | 2                         | FAIL                   | NA          | NA        | NA                 | NA          | NA                                                                   | NA         |
| chr5                      | 0                         | FAIL                   | NA          | NA        | NA                 | NA          | NA                                                                   | NA         |
| chr6:3708179-62124252     | 4                         | FAIL                   | PASS        | PASS      | PASS               | chain       | chr1:9539001-120227000, chr6:3708179-62124252, chr9:3583986-96148287 | Event(CR1) |
| chr7                      | 0                         | FAIL                   | NA          | NA        | NA                 | NA          | NA                                                                   | NA         |
| chr8:4752303-48640488     | 1                         | FAIL                   | FAIL        | FAIL      | FAIL               | NA          | NA                                                                   | NA         |
| chr9:3583986-96148287     | 6                         | PASS                   | PASS        | PASS      | PASS               | chain       | chr1:9539001-120227000, chr6:3708179-62124252, chr9:3583986-96148287 | Event(CR1) |
| chr10                     | 0                         | FAIL                   | NA          | NA        | NA                 | NA          | NA                                                                   | NA         |
| chr11:112157676-113770443 | 5                         | PASS                   | PASS        | PASS      | PASS               | chain       | chr11:112157676-113770443, chr12:43625536-60197672                   | Event(CR1) |
| chr12:43625536-60197672   | 6                         | PASS                   | PASS        | PASS      | PASS               | chain       | chr11:112157676-113770443, chr12:43625536-60197672                   | Event(CR1) |
| chr13                     | 0                         | FAIL                   | NA          | NA        | NA                 | NA          | NA                                                                   | NA         |
| chr14                     | 0                         | FAIL                   | NA          | NA        | NA                 | NA          | NA                                                                   | NA         |
| chr15:45286001-98711755   | 5                         | FAIL                   | PASS        | PASS      | PASS               | inter       | NA                                                                   | Event(CR2) |
| chr16                     | 1                         | FAIL                   | NA          | NA        | NA                 | NA          | NA                                                                   | NA         |
| chr17:1842475-80056000    | 6                         | PASS                   | PASS        | PASS      | PASS               | inter       | NA                                                                   | Event(CR1) |
| chr18:18772660-18785600   | 6                         | FAIL                   | FAIL        | FAIL      | FAIL               | NA          | NA                                                                   | NA         |
| chr19                     | 0                         | FAIL                   | NA          | NA        | NA                 | NA          | NA                                                                   | NA         |
| chr20                     | 0                         | FAIL                   | NA          | NA        | NA                 | NA          | NA                                                                   | NA         |
| chr21                     | 0                         | FAIL                   | NA          | NA        | NA                 | NA          | NA                                                                   | NA         |
| chr22                     | 0                         | FAIL                   | NA          | NA        | NA                 | NA          | NA                                                                   | NA         |
| chrX                      | 1                         | FAIL                   | NA          | NA        | NA                 | NA          | NA                                                                   | NA         |
| chrY                      | 0                         | FAIL                   | NA          | NA        | NA                 | NA          | NA                                                                   | NA         |

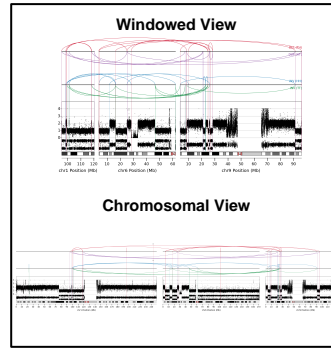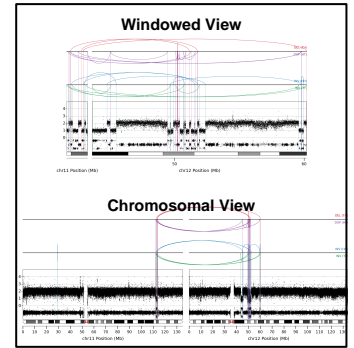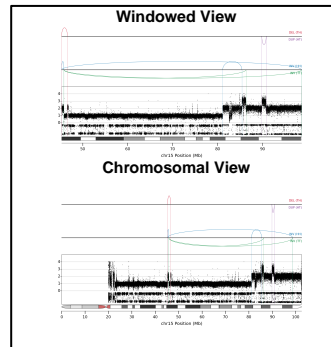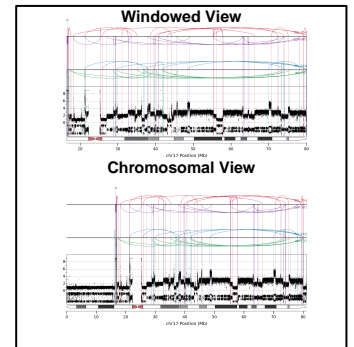

|                          | Total Pass: Chromosome(s) | Window ID with >= 8 SV | Window Join | Window AR | Window Oscillation | Window Type | Window Chain                                    | Overall    |
|--------------------------|---------------------------|------------------------|-------------|-----------|--------------------|-------------|-------------------------------------------------|------------|
| chr1                     | 0                         | FAIL                   | NA          | NA        | NA                 | NA          | NA                                              | NA         |
| chr2                     | 3                         | FAIL                   | NA          | NA        | NA                 | NA          | NA                                              | NA         |
| chr3                     | 1                         | FAIL                   | NA          | NA        | NA                 | NA          | NA                                              | NA         |
| chr4                     | 2                         | FAIL                   | NA          | NA        | NA                 | NA          | NA                                              | NA         |
| chr5                     | 0                         | FAIL                   | NA          | NA        | NA                 | NA          | NA                                              | NA         |
| chr6                     | 0                         | FAIL                   | NA          | NA        | NA                 | NA          | NA                                              | NA         |
| chr7:19879932-155779000  | 5                         | PASS                   | PASS        | PASS      | FAIL               | inter       | NA                                              | Event(CR1) |
| chr8                     | 1                         | FAIL                   | NA          | NA        | NA                 | NA          | NA                                              | NA         |
| chr9                     | 0                         | FAIL                   | NA          | NA        | NA                 | NA          | NA                                              | NA         |
| chr10                    | 0                         | FAIL                   | NA          | NA        | NA                 | NA          | NA                                              | NA         |
| chr11                    | 1                         | FAIL                   | NA          | NA        | NA                 | NA          | NA                                              | NA         |
| chr12:2437749-67988000   | 6                         | PASS                   | PASS        | PASS      | PASS               | inter       | NA                                              | Event(CR1) |
| chr13                    | 0                         | FAIL                   | NA          | NA        | NA                 | NA          | NA                                              | NA         |
| chr14                    | 0                         | FAIL                   | NA          | NA        | NA                 | NA          | NA                                              | NA         |
| chr15                    | 0                         | FAIL                   | NA          | NA        | NA                 | NA          | NA                                              | NA         |
| chr16                    | 0                         | FAIL                   | NA          | NA        | NA                 | NA          | NA                                              | NA         |
| chr17:1808968-20338938   | 3                         | FAIL                   | PASS        | FAIL      | FAIL               | chain       | chr17:1808968-20338938, chr19:29264988-41804580 | NA         |
| chr18:913001-22133486    | 2                         | FAIL                   | FAIL        | FAIL      | FAIL               | NA          | NA                                              | NA         |
| chr19:29264988-41804580  | 6                         | PASS                   | FAIL        | PASS      | FAIL               | chain       | chr17:1808968-20338938, chr19:29264988-41804580 | NA         |
| chr19:4444753-48824000   | 6                         | FAIL                   | FAIL        | PASS      | PASS               | NA          | NA                                              | NA         |
| chr20                    | 0                         | FAIL                   | NA          | NA        | NA                 | NA          | NA                                              | NA         |
| chr21                    | 0                         | FAIL                   | NA          | NA        | NA                 | NA          | NA                                              | NA         |
| chr22                    | 1                         | FAIL                   | NA          | NA        | NA                 | NA          | NA                                              | NA         |
| chrX:116533581-125907838 | 2                         | FAIL                   | PASS        | FAIL      | FAIL               | NA          | NA                                              | NA         |
| chrX:150625289-151575031 | 2                         | FAIL                   | FAIL        | FAIL      | FAIL               | NA          | NA                                              | NA         |
| chrY                     | 0                         | FAIL                   | NA          | NA        | NA                 | NA          | NA                                              | NA         |

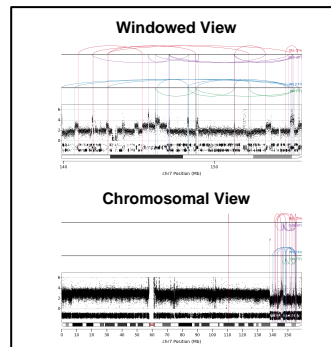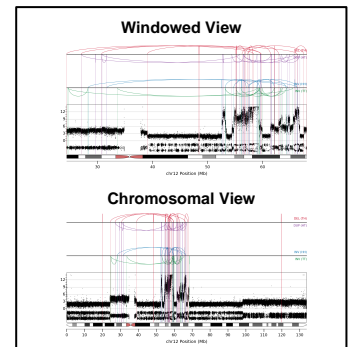

|                         | Total Pass: Chromosome(s) | Window ID with >= 8 SV | Window Join | Window AR | Window Oscillation | Window Type | Window Chain                                     | Overall    |
|-------------------------|---------------------------|------------------------|-------------|-----------|--------------------|-------------|--------------------------------------------------|------------|
| chr1                    | 0                         | FAIL                   | NA          | NA        | NA                 | NA          | NA                                               | NA         |
| chr2                    | 0                         | FAIL                   | NA          | NA        | NA                 | NA          | NA                                               | NA         |
| chr3                    | 0                         | FAIL                   | NA          | NA        | NA                 | NA          | NA                                               | NA         |
| chr4                    | 0                         | FAIL                   | NA          | NA        | NA                 | NA          | NA                                               | NA         |
| chr5                    | 0                         | FAIL                   | NA          | NA        | NA                 | NA          | NA                                               | NA         |
| chr6                    | 0                         | FAIL                   | NA          | NA        | NA                 | NA          | NA                                               | NA         |
| chr7:98372476-88468200  | 2                         | FAIL                   | FAIL        | FAIL      | FAIL               | NA          | NA                                               | NA         |
| chr8                    | 0                         | FAIL                   | NA          | NA        | NA                 | NA          | NA                                               | NA         |
| chr9                    | 0                         | FAIL                   | NA          | NA        | NA                 | NA          | NA                                               | NA         |
| chr10                   | 0                         | FAIL                   | NA          | NA        | NA                 | NA          | NA                                               | NA         |
| chr11                   | 0                         | FAIL                   | NA          | NA        | NA                 | NA          | NA                                               | NA         |
| chr12                   | 0                         | FAIL                   | NA          | NA        | NA                 | NA          | NA                                               | NA         |
| chr13                   | 0                         | FAIL                   | NA          | NA        | NA                 | NA          | NA                                               | NA         |
| chr14:20525777-31919665 | 3                         | FAIL                   | PASS        | FAIL      | FAIL               | chain       | chr14:20525777-31919665, chr18:16787459-48367189 | Event(CR1) |
| chr15                   | 0                         | FAIL                   | NA          | NA        | NA                 | NA          | NA                                               | NA         |
| chr16                   | 0                         | FAIL                   | NA          | NA        | NA                 | NA          | NA                                               | NA         |
| chr17                   | 0                         | FAIL                   | NA          | NA        | NA                 | NA          | NA                                               | NA         |
| chr18:16787459-48367189 | 6                         | PASS                   | PASS        | PASS      | PASS               | chain       | chr14:20525777-31919665, chr18:16787459-48367189 | Event(CR1) |
| chr19                   | 0                         | FAIL                   | NA          | NA        | NA                 | NA          | NA                                               | NA         |
| chr20                   | 0                         | FAIL                   | NA          | NA        | NA                 | NA          | NA                                               | NA         |
| chr21                   | 0                         | FAIL                   | NA          | NA        | NA                 | NA          | NA                                               | NA         |
| chr22                   | 0                         | FAIL                   | NA          | NA        | NA                 | NA          | NA                                               | NA         |
| chrX                    | 0                         | FAIL                   | NA          | NA        | NA                 | NA          | NA                                               | NA         |
| chrY                    | 0                         | FAIL                   | NA          | NA        | NA                 | NA          | NA                                               | NA         |

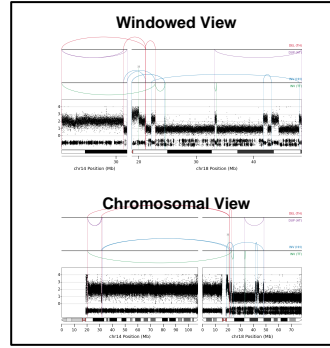

|                          | Total Pass: Chromosome(s) | Window ID with >= 8 SV | Window Join | Window AR | Window Oscillation | Window Type | Window Chain                                                                                      | Overall    |
|--------------------------|---------------------------|------------------------|-------------|-----------|--------------------|-------------|---------------------------------------------------------------------------------------------------|------------|
| chr1                     | 3                         | FAIL                   | NA          | NA        | NA                 | NA          | NA                                                                                                | NA         |
| chr2:58380309-132236909  | 6                         | FAIL                   | FAIL        | FAIL      | FAIL               | NA          | NA                                                                                                | NA         |
| chr2:147364933-18668238  | 6                         | PASS                   | PASS        | PASS      | PASS               | inter       | NA                                                                                                | Event(CR1) |
| chr3                     | 0                         | FAIL                   | NA          | NA        | NA                 | NA          | NA                                                                                                | NA         |
| chr4:15026733-15039031   | 6                         | FAIL                   | FAIL        | FAIL      | FAIL               | chain       | chr10:92740641-135327144, chr4:15026733-15039031                                                  | NA         |
| chr4:39012639-39900000   | 6                         | FAIL                   | FAIL        | FAIL      | FAIL               | chain       | chr4:39012639-39900000, chr9:116421601-117281000                                                  | NA         |
| chr4:56502355-5973452    | 6                         | FAIL                   | FAIL        | FAIL      | FAIL               | NA          | NA                                                                                                | NA         |
| chr4:603907607-71613334  | 6                         | FAIL                   | FAIL        | FAIL      | FAIL               | inter       | NA                                                                                                | NA         |
| chr5:159495094-165558328 | 2                         | FAIL                   | FAIL        | FAIL      | FAIL               | chain       | chr11:56440058-66297000, chr5:159495094-165558328                                                 | Event(CR2) |
| chr6                     | 3                         | FAIL                   | NA          | NA        | NA                 | NA          | NA                                                                                                | NA         |
| chr7                     | 1                         | FAIL                   | NA          | NA        | NA                 | NA          | NA                                                                                                | NA         |
| chr8:57199635-57213805   | 3                         | FAIL                   | FAIL        | FAIL      | FAIL               | NA          | NA                                                                                                | NA         |
| chr9:116421601-117281000 | 4                         | FAIL                   | FAIL        | FAIL      | FAIL               | chain       | chr4:39012639-39900000, chr9:116421601-117281000                                                  | NA         |
| chr10:21748001-22149128  | 2                         | FAIL                   | FAIL        | FAIL      | FAIL               | NA          | NA                                                                                                | NA         |
| chr10:92740641-135327144 | 2                         | FAIL                   | FAIL        | FAIL      | FAIL               | chain       | chr10:92740641-135327144, chr4:15026733-15039031                                                  | NA         |
| chr11:56440058-66297000  | 4                         | FAIL                   | PASS        | FAIL      | PASS               | chain       | chr11:56440058-66297000, chr5:159495094-165558328                                                 | Event(CR2) |
| chr12:9771311-95710764   | 6                         | PASS                   | PASS        | FAIL      | FAIL               | chain       | chr12:9771311-95710764, chr13:40562144-41486110, chr20:10655296-11661636, chr21:37963001-38451019 | NA         |
| chr13:40562144-41486110  | 4                         | FAIL                   | PASS        | FAIL      | FAIL               | chain       | chr12:9771311-95710764, chr13:40562144-41486110, chr20:10655296-11661636, chr21:37963001-38451019 | NA         |
| chr14                    | 2                         | FAIL                   | NA          | NA        | NA                 | NA          | NA                                                                                                | NA         |
| chr15                    | 0                         | FAIL                   | NA          | NA        | NA                 | NA          | NA                                                                                                | NA         |
| chr16                    | 0                         | FAIL                   | NA          | NA        | NA                 | NA          | NA                                                                                                | NA         |
| chr17                    | 2                         | FAIL                   | NA          | NA        | NA                 | NA          | NA                                                                                                | NA         |
| chr18                    | 2                         | FAIL                   | NA          | NA        | NA                 | NA          | NA                                                                                                | NA         |
| chr19                    | 4                         | FAIL                   | NA          | NA        | NA                 | NA          | NA                                                                                                | NA         |
| chr20:6680751-7720000    | 1                         | FAIL                   | FAIL        | FAIL      | FAIL               | NA          | NA                                                                                                | NA         |
| chr20:10655296-11661636  | 1                         | FAIL                   | FAIL        | FAIL      | FAIL               | chain       | chr12:9771311-95710764, chr13:40562144-41486110, chr20:10655296-11661636, chr21:37963001-38451019 | NA         |
| chr21:18404157-19330000  | 2                         | FAIL                   | FAIL        | FAIL      | FAIL               | NA          | NA                                                                                                | NA         |
| chr21:37963001-38451019  | 2                         | FAIL                   | FAIL        | FAIL      | FAIL               | chain       | chr12:9771311-95710764, chr13:40562144-41486110, chr20:10655296-11661636, chr21:37963001-38451019 | NA         |
| chr22                    | 0                         | FAIL                   | NA          | NA        | NA                 | NA          | NA                                                                                                | NA         |
| chrX:107833861-119281432 | 0                         | FAIL                   | FAIL        | FAIL      | FAIL               | NA          | NA                                                                                                | NA         |
| chrY                     | 0                         | FAIL                   | NA          | NA        | NA                 | NA          | NA                                                                                                | NA         |

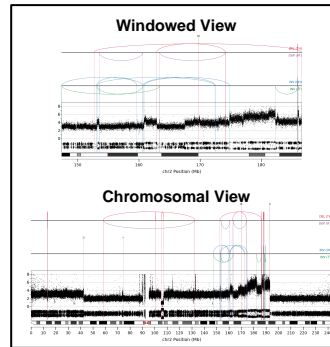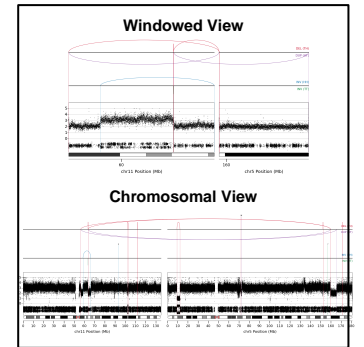

|                        | Total Pass: Chromosome(s) | Window ID with >= 8 SV | Window Join | Window AR | Window Oscillation | Window Type | Window Chain                                   | Overall    |
|------------------------|---------------------------|------------------------|-------------|-----------|--------------------|-------------|------------------------------------------------|------------|
| chr1:40259001-59848000 | 5                         | FAIL                   | FAIL        | PASS      | PASS               | inter       | NA                                             | NA         |
| chr2                   | 0                         | FAIL                   | NA          | NA        | NA                 | NA          | NA                                             | NA         |
| chr3                   | 0                         | FAIL                   | NA          | NA        | NA                 | NA          | NA                                             | NA         |
| chr4                   | 0                         | FAIL                   | NA          | NA        | NA                 | NA          | NA                                             | NA         |
| chr5                   | 0                         | FAIL                   | NA          | NA        | NA                 | NA          | NA                                             | NA         |
| chr6:4942001-147104000 | 5                         | PASS                   | PASS        | PASS      | PASS               | inter       | NA                                             | Event(CR1) |
| chr7                   | 0                         | FAIL                   | NA          | NA        | NA                 | NA          | NA                                             | NA         |
| chr8:34754543-38754977 | 0                         | FAIL                   | FAIL        | FAIL      | FAIL               | chain       | chr8:34754543-38754977, chr9:31280815-35408637 | NA         |
| chr9:18384809-22859000 | 6                         | FAIL                   | FAIL        | FAIL      | FAIL               | NA          | NA                                             | NA         |
| chr9:31280815-35408637 | 6                         | FAIL                   | FAIL        | FAIL      | PASS               | chain       | chr8:34754543-38754977, chr9:31280815-35408637 | NA         |
| chr10                  | 2                         | FAIL                   | NA          | NA        | NA                 | NA          | NA                                             | NA         |
| chr11                  | 0                         | FAIL                   | NA          | NA        | NA                 | NA          | NA                                             | NA         |
| chr12                  | 0                         | FAIL                   | NA          | NA        | NA                 | NA          | NA                                             | NA         |
| chr13                  | 1                         | FAIL                   | NA          | NA        | NA                 | NA          | NA                                             | NA         |
| chr14                  | 0                         | FAIL                   | NA          | NA        | NA                 | NA          | NA                                             | NA         |
| chr15                  | 0                         | FAIL                   | NA          | NA        | NA                 | NA          | NA                                             | NA         |
| chr16                  | 0                         | FAIL                   | NA          | NA        | NA                 | NA          | NA                                             | NA         |
| chr17                  | 0                         | FAIL                   | NA          | NA        | NA                 | NA          | NA                                             | NA         |
| chr18                  | 0                         | FAIL                   | NA          | NA        | NA                 | NA          | NA                                             | NA         |
| chr19                  | 0                         | FAIL                   | NA          | NA        | NA                 | NA          | NA                                             | NA         |
| chr20                  | 0                         | FAIL                   | NA          | NA        | NA                 | NA          | NA                                             | NA         |
| chr21                  | 0                         | FAIL                   | NA          | NA        | NA                 | NA          | NA                                             | NA         |
| chr22                  | 0                         | FAIL                   | NA          | NA        | NA                 | NA          | NA                                             | NA         |
| chrX                   | 0                         | FAIL                   | NA          | NA        | NA                 | NA          | NA                                             | NA         |
| chrY                   | 0                         | FAIL                   | NA          | NA        | NA                 | NA          | NA                                             | NA         |

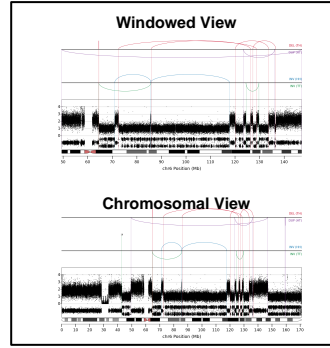

|                          | Total Pass: Chromosome(s) | Window ID with >= 8 SV | Window Join | Window AR | Window Oscillation | Window Type | Window Chain                                      | Overall    |
|--------------------------|---------------------------|------------------------|-------------|-----------|--------------------|-------------|---------------------------------------------------|------------|
| chr1:169681439-248445801 | 5                         | PASS                   | PASS        | PASS      | PASS               | chain       | chr1:169681439-248445801, chr5:22786001-162205117 | Event(CR1) |
| chr2                     | 1                         | FAIL                   | NA          | NA        | NA                 | NA          | NA                                                | NA         |
| chr3:87024011-137447708  | 5                         | PASS                   | PASS        | PASS      | FAIL               | NA          | NA                                                | NA         |
| chr4                     | 3                         | FAIL                   | NA          | NA        | NA                 | NA          | NA                                                | NA         |
| chr5:22796001-162205117  | 6                         | PASS                   | PASS        | PASS      | PASS               | chain       | chr1:169681439-248445801, chr5:22786001-162205117 | Event(CR1) |
| chr6                     | 2                         | FAIL                   | NA          | NA        | NA                 | NA          | NA                                                | NA         |
| chr7                     | 0                         | FAIL                   | NA          | NA        | NA                 | NA          | NA                                                | NA         |
| chr8:78094001-138925287  | 2                         | FAIL                   | PASS        | PASS      | FAIL               | NA          | NA                                                | NA         |
| chr9:3130712-21110320    | 1                         | FAIL                   | FAIL        | FAIL      | FAIL               | NA          | NA                                                | NA         |
| chr10                    | 0                         | FAIL                   | NA          | NA        | NA                 | NA          | NA                                                | NA         |
| chr11                    | 0                         | FAIL                   | NA          | NA        | NA                 | NA          | NA                                                | NA         |
| chr12                    | 0                         | FAIL                   | NA          | NA        | NA                 | NA          | NA                                                | NA         |
| chr13                    | 0                         | FAIL                   | NA          | NA        | NA                 | NA          | NA                                                | NA         |
| chr14                    | 0                         | FAIL                   | NA          | NA        | NA                 | NA          | NA                                                | NA         |
| chr15                    | 1                         | FAIL                   | NA          | NA        | NA                 | NA          | NA                                                | NA         |
| chr16                    | 1                         | FAIL                   | NA          | NA        | NA                 | NA          | NA                                                | NA         |
| chr17                    | 0                         | FAIL                   | NA          | NA        | NA                 | NA          | NA                                                | NA         |
| chr18                    | 5                         | FAIL                   | NA          | NA        | NA                 | NA          | NA                                                | NA         |
| chr19:35029365-4021791   | 3                         | FAIL                   | FAIL        | FAIL      | FAIL               | NA          | NA                                                | NA         |
| chr20                    | 1                         | FAIL                   | NA          | NA        | NA                 | NA          | NA                                                | NA         |
| chr21                    | 0                         | FAIL                   | NA          | NA        | NA                 | NA          | NA                                                | NA         |
| chr22                    | 0                         | FAIL                   | NA          | NA        | NA                 | NA          | NA                                                | NA         |
| chrX:148170983-150326006 | 0                         | FAIL                   | FAIL        | FAIL      | FAIL               | NA          | NA                                                | NA         |
| chrY                     | 0                         | FAIL                   | NA          | NA        | NA                 | NA          | NA                                                | NA         |

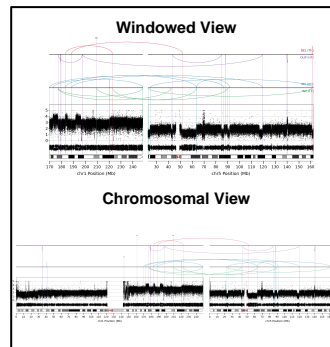

PCSI\_0325\_Pa\_P\_526

PCSI\_0325\_Pa\_P\_526

|                          | Total Pass: Chromosome(s) | Window ID with >= 8 SV | Window Join | Window AR | Window Oscillation | Window Type | Window Chain                                                                                                                                    | Overall    |
|--------------------------|---------------------------|------------------------|-------------|-----------|--------------------|-------------|-------------------------------------------------------------------------------------------------------------------------------------------------|------------|
| chr1                     | 0                         | FAIL                   | NA          | NA        | NA                 | NA          | NA                                                                                                                                              | NA         |
| chr2                     | 0                         | FAIL                   | NA          | NA        | NA                 | NA          | NA                                                                                                                                              | NA         |
| chr3:35725613-197664349  | 6                         | PASS                   | PASS        | PASS      | PASS               | chain       | chr3:35725613-197664349, chr8:9607687-43205301                                                                                                  | Event(CR1) |
| chr4                     | 1                         | FAIL                   | NA          | NA        | NA                 | NA          | NA                                                                                                                                              | NA         |
| chr5                     | 0                         | FAIL                   | NA          | NA        | NA                 | NA          | NA                                                                                                                                              | NA         |
| chr6:19692214-20462258   | 3                         | FAIL                   | FAIL        | FAIL      | FAIL               | NA          | NA                                                                                                                                              | NA         |
| chr7:1713824-82399406    | 6                         | PASS                   | PASS        | PASS      | PASS               | chain       | chr11:44665819-78023545, chr12:2802174-34727000, chr18:1144001-2144162, chr18:2708927-73038519, chr7:1713824-82399406, chr8:103419668-105411372 | Event(CR1) |
| chr8:9607687-43205301    | 3                         | FAIL                   | FAIL        | FAIL      | FAIL               | chain       | chr3:35725613-197664349, chr8:9607687-43205301                                                                                                  | Event(CR1) |
| chr8:49601753-70634000   | 3                         | FAIL                   | FAIL        | FAIL      | FAIL               | NA          | NA                                                                                                                                              | NA         |
| chr8:103419668-105411372 | 3                         | FAIL                   | FAIL        | FAIL      | FAIL               | chain       | chr11:44665819-78023545, chr12:2802174-34727000, chr18:1144001-2144162, chr18:2708927-73038519, chr7:1713824-82399406, chr8:103419668-105411372 | Event(CR1) |
| chr9                     | 0                         | FAIL                   | NA          | NA        | NA                 | NA          | NA                                                                                                                                              | NA         |
| chr10                    | 0                         | FAIL                   | NA          | NA        | NA                 | NA          | NA                                                                                                                                              | NA         |
| chr11:44665819-78023545  | 5                         | PASS                   | FAIL        | PASS      | FAIL               | chain       | chr11:44665819-78023545, chr12:2802174-34727000, chr18:1144001-2144162, chr18:2708927-73038519, chr7:1713824-82399406, chr8:103419668-105411372 | Event(CR1) |
| chr11:89041662-123121855 | 5                         | FAIL                   | PASS        | FAIL      | FAIL               | NA          | NA                                                                                                                                              | NA         |
| chr12:2802174-34727000   | 6                         | PASS                   | PASS        | PASS      | PASS               | chain       | chr11:44665819-78023545, chr12:2802174-34727000, chr18:1144001-2144162, chr18:2708927-73038519, chr7:1713824-82399406, chr8:103419668-105411372 | Event(CR1) |
| chr13                    | 0                         | FAIL                   | NA          | NA        | NA                 | NA          | NA                                                                                                                                              | NA         |
| chr14                    | 0                         | FAIL                   | NA          | NA        | NA                 | NA          | NA                                                                                                                                              | NA         |
| chr15                    | 0                         | FAIL                   | NA          | NA        | NA                 | NA          | NA                                                                                                                                              | NA         |
| chr16                    | 0                         | FAIL                   | NA          | NA        | NA                 | NA          | NA                                                                                                                                              | NA         |
| chr17                    | 1                         | FAIL                   | NA          | NA        | NA                 | NA          | NA                                                                                                                                              | NA         |
| chr18:1144001-2144162    | 4                         | FAIL                   | FAIL        | FAIL      | FAIL               | chain       | chr11:44665819-78023545, chr12:2802174-34727000, chr18:1144001-2144162, chr18:2708927-73038519, chr7:1713824-82399406, chr8:103419668-105411372 | Event(CR1) |
| chr18:2708927-73038519   | 4                         | FAIL                   | PASS        | PASS      | FAIL               | chain       | chr11:44665819-78023545, chr12:2802174-34727000, chr18:1144001-2144162, chr18:2708927-73038519, chr7:1713824-82399406, chr8:103419668-105411372 | Event(CR1) |
| chr19                    | 1                         | FAIL                   | NA          | NA        | NA                 | NA          | NA                                                                                                                                              | NA         |
| chr20                    | 0                         | FAIL                   | NA          | NA        | NA                 | NA          | NA                                                                                                                                              | NA         |
| chr21                    | 0                         | FAIL                   | NA          | NA        | NA                 | NA          | NA                                                                                                                                              | NA         |
| chr22                    | 0                         | FAIL                   | NA          | NA        | NA                 | NA          | NA                                                                                                                                              | NA         |
| chrX                     | 0                         | FAIL                   | NA          | NA        | NA                 | NA          | NA                                                                                                                                              | NA         |
| chrY                     | 0                         | FAIL                   | NA          | NA        | NA                 | NA          | NA                                                                                                                                              | NA         |

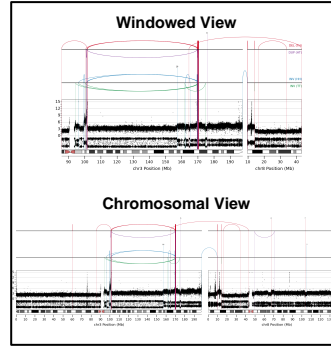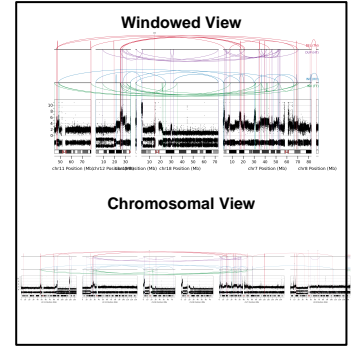

PCSI\_0326\_Pa\_P\_526

PCSI\_0326\_Pa\_P\_526

|                          | Total Pass: Chromosome(s) | Window ID with >= 8 SV | Window Join | Window AR | Window Oscillation | Window Type | Window Chain                                                               | Overall    |
|--------------------------|---------------------------|------------------------|-------------|-----------|--------------------|-------------|----------------------------------------------------------------------------|------------|
| chr1:211067001-214131084 | 5                         | FAIL                   | PASS        | FAIL      | FAIL               | chain       | chr18:4251854-77944211, chr1:211067001-214131084, chr2:204185669-204198757 | NA         |
| chr2:204185669-204198757 | 0                         | FAIL                   | FAIL        | FAIL      | FAIL               | chain       | chr18:4251854-77944211, chr1:211067001-214131084, chr2:204185669-204198757 | NA         |
| chr3:48432001-50521014   | 1                         | FAIL                   | FAIL        | FAIL      | FAIL               | chain       | chr3:48432001-50521014, chrX:82597806-83952059                             | NA         |
| chr4:85476001-117536000  | 2                         | FAIL                   | FAIL        | PASS      | PASS               | chain       | chr4:85476001-117536000, chrX:106946387-107421642                          | NA         |
| chr5                     | 1                         | FAIL                   | NA          | NA        | NA                 | NA          | NA                                                                         | NA         |
| chr6                     | 0                         | FAIL                   | NA          | NA        | NA                 | NA          | NA                                                                         | NA         |
| chr7:138233528-141334359 | 1                         | FAIL                   | FAIL        | FAIL      | FAIL               | NA          | NA                                                                         | NA         |
| chr8                     | 0                         | FAIL                   | NA          | NA        | NA                 | NA          | NA                                                                         | NA         |
| chr9                     | 0                         | FAIL                   | NA          | NA        | NA                 | NA          | NA                                                                         | NA         |
| chr10                    | 0                         | FAIL                   | NA          | NA        | NA                 | NA          | NA                                                                         | NA         |
| chr11                    | 0                         | FAIL                   | NA          | NA        | NA                 | NA          | NA                                                                         | NA         |
| chr12                    | 0                         | FAIL                   | NA          | NA        | NA                 | NA          | NA                                                                         | NA         |
| chr13:71759273-111390184 | 5                         | PASS                   | PASS        | PASS      | PASS               | inter       | NA                                                                         | Event(CR1) |
| chr14                    | 0                         | FAIL                   | NA          | NA        | NA                 | NA          | NA                                                                         | NA         |
| chr15                    | 0                         | FAIL                   | NA          | NA        | NA                 | NA          | NA                                                                         | NA         |
| chr16                    | 0                         | FAIL                   | NA          | NA        | NA                 | NA          | NA                                                                         | NA         |
| chr17                    | 1                         | FAIL                   | NA          | NA        | NA                 | NA          | NA                                                                         | NA         |
| chr18:4251854-77944211   | 4                         | FAIL                   | PASS        | PASS      | FAIL               | chain       | chr18:4251854-77944211, chr1:211067001-214131084, chr2:204185669-204198757 | NA         |
| chr19                    | 0                         | FAIL                   | NA          | NA        | NA                 | NA          | NA                                                                         | NA         |
| chr20                    | 0                         | FAIL                   | NA          | NA        | NA                 | NA          | NA                                                                         | NA         |
| chr21                    | 0                         | FAIL                   | NA          | NA        | NA                 | NA          | NA                                                                         | NA         |
| chr22                    | 0                         | FAIL                   | NA          | NA        | NA                 | NA          | NA                                                                         | NA         |
| chrX:82597806-83952059   | 1                         | FAIL                   | FAIL        | FAIL      | FAIL               | chain       | chr3:48432001-50521014, chrX:82597806-83952059                             | NA         |
| chrX:106946387-107421642 | 1                         | FAIL                   | FAIL        | FAIL      | FAIL               | chain       | chr4:85476001-117536000, chrX:106946387-107421642                          | NA         |
| chrY                     | 0                         | FAIL                   | NA          | NA        | NA                 | NA          | NA                                                                         | NA         |

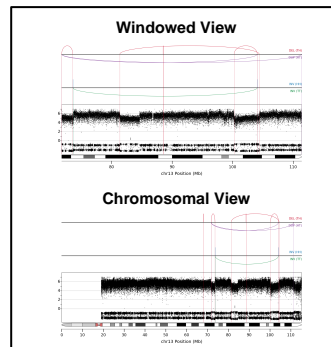

|                           | Total Pass: Chromosome(s) | Window ID with >= 8 SV | Window Join | Window AR | Window Oscillation | Window Type | Window Chain                                     | Overall    |
|---------------------------|---------------------------|------------------------|-------------|-----------|--------------------|-------------|--------------------------------------------------|------------|
| chr1:1302307-249198720    | 5                         | PASS                   | FAIL        | PASS      | PASS               | inter       | NA                                               | Event(CR2) |
| chr2                      | 4                         | FAIL                   | NA          | NA        | NA                 | NA          | NA                                               | NA         |
| chr3:39966001-5663853     | 4                         | FAIL                   | FAIL        | FAIL      | PASS               | NA          | NA                                               | NA         |
| chr3:152752420-153113262  | 4                         | FAIL                   | FAIL        | FAIL      | FAIL               | NA          | NA                                               | NA         |
| chr4:80349001-80506372    | 4                         | FAIL                   | FAIL        | FAIL      | FAIL               | NA          | NA                                               | NA         |
| chr5:139022001-160537509  | 4                         | FAIL                   | PASS        | PASS      | FAIL               | NA          | NA                                               | NA         |
| chr5:161123756-161226000  | 4                         | FAIL                   | FAIL        | FAIL      | FAIL               | NA          | NA                                               | NA         |
| chr6:64151459-67347000    | 5                         | FAIL                   | FAIL        | FAIL      | FAIL               | NA          | NA                                               | NA         |
| chr7:36808670-37240284    | 4                         | FAIL                   | FAIL        | FAIL      | FAIL               | NA          | NA                                               | NA         |
| chr7:100677643-101034723  | 4                         | FAIL                   | FAIL        | FAIL      | FAIL               | chain       | chr7:100677643-101034723, chr8:66877001-67110580 | NA         |
| chr8:36061564-48163700    | 4                         | FAIL                   | FAIL        | FAIL      | FAIL               | NA          | NA                                               | NA         |
| chr8:66877001-67110580    | 4                         | FAIL                   | FAIL        | FAIL      | FAIL               | chain       | chr7:100677643-101034723, chr8:66877001-67110580 | NA         |
| chr9                      | 5                         | FAIL                   | NA          | NA        | NA                 | NA          | NA                                               | NA         |
| chr10                     | 3                         | FAIL                   | NA          | NA        | NA                 | NA          | NA                                               | NA         |
| chr11                     | 4                         | FAIL                   | NA          | NA        | NA                 | NA          | NA                                               | NA         |
| chr12                     | 4                         | FAIL                   | NA          | NA        | NA                 | NA          | NA                                               | NA         |
| chr13:106984562-107335557 | 4                         | FAIL                   | FAIL        | FAIL      | FAIL               | NA          | NA                                               | NA         |
| chr14                     | 2                         | FAIL                   | NA          | NA        | NA                 | NA          | NA                                               | NA         |
| chr15                     | 3                         | FAIL                   | NA          | NA        | NA                 | NA          | NA                                               | NA         |
| chr16                     | 0                         | FAIL                   | NA          | NA        | NA                 | NA          | NA                                               | NA         |
| chr17                     | 2                         | FAIL                   | NA          | NA        | NA                 | NA          | NA                                               | NA         |
| chr18                     | 0                         | FAIL                   | NA          | NA        | NA                 | NA          | NA                                               | NA         |
| chr19                     | 2                         | FAIL                   | NA          | NA        | NA                 | NA          | NA                                               | NA         |
| chr20:46491001-49832547   | 3                         | FAIL                   | FAIL        | FAIL      | FAIL               | NA          | NA                                               | NA         |
| chr21                     | 2                         | FAIL                   | NA          | NA        | NA                 | NA          | NA                                               | NA         |
| chr22                     | 2                         | FAIL                   | NA          | NA        | NA                 | NA          | NA                                               | NA         |
| chrX:14759184-147894020   | 1                         | FAIL                   | FAIL        | FAIL      | FAIL               | NA          | NA                                               | NA         |
| chrY                      | 0                         | FAIL                   | NA          | NA        | NA                 | NA          | NA                                               | NA         |

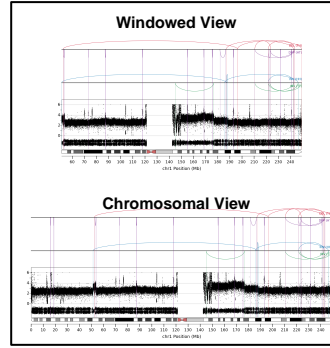

|                           | Total Pass: Chromosome(s) | Window ID with >= 8 SV | Window Join | Window AR | Window Oscillation | Window Type | Window Chain | Overall    |
|---------------------------|---------------------------|------------------------|-------------|-----------|--------------------|-------------|--------------|------------|
| chr1                      | 3                         | FAIL                   | NA          | NA        | NA                 | NA          | NA           | NA         |
| chr2:137719824-143498995  | 5                         | PASS                   | PASS        | FAIL      | FAIL               | inter       | NA           | NA         |
| chr2:172970226-187328630  | 5                         | FAIL                   | FAIL        | FAIL      | FAIL               | NA          | NA           | NA         |
| chr3                      | 0                         | FAIL                   | NA          | NA        | NA                 | NA          | NA           | NA         |
| chr4:15572992-19091000    | 4                         | FAIL                   | FAIL        | PASS      | PASS               | NA          | NA           | NA         |
| chr5:129755279-141673356  | 1                         | FAIL                   | FAIL        | FAIL      | FAIL               | NA          | NA           | NA         |
| chr6:17051806-49561000    | 4                         | FAIL                   | FAIL        | PASS      | FAIL               | NA          | NA           | NA         |
| chr6:97380303-98080147    | 4                         | FAIL                   | FAIL        | FAIL      | FAIL               | NA          | NA           | NA         |
| chr7:82693651-83281000    | 4                         | FAIL                   | FAIL        | FAIL      | FAIL               | NA          | NA           | NA         |
| chr8:102609180-104847969  | 2                         | FAIL                   | FAIL        | FAIL      | FAIL               | NA          | NA           | NA         |
| chr9:21791001-24009472    | 6                         | PASS                   | PASS        | PASS      | PASS               | inter       | NA           | Event(CR1) |
| chr9:77624870-107179654   | 6                         | FAIL                   | FAIL        | FAIL      | FAIL               | NA          | NA           | NA         |
| chr9:126906549-127134255  | 6                         | FAIL                   | FAIL        | FAIL      | FAIL               | NA          | NA           | NA         |
| chr10                     | 2                         | FAIL                   | NA          | NA        | NA                 | NA          | NA           | NA         |
| chr11                     | 0                         | FAIL                   | NA          | NA        | NA                 | NA          | NA           | NA         |
| chr12:108063408-108472453 | 5                         | FAIL                   | FAIL        | FAIL      | FAIL               | NA          | NA           | NA         |
| chr13                     | 1                         | FAIL                   | NA          | NA        | NA                 | NA          | NA           | NA         |
| chr14                     | 0                         | FAIL                   | NA          | NA        | NA                 | NA          | NA           | NA         |
| chr15                     | 0                         | FAIL                   | NA          | NA        | NA                 | NA          | NA           | NA         |
| chr16:65871828-65915828   | 1                         | FAIL                   | FAIL        | FAIL      | FAIL               | NA          | NA           | NA         |
| chr17:62259677-62402000   | 3                         | FAIL                   | FAIL        | FAIL      | FAIL               | NA          | NA           | NA         |
| chr18:48599001-51118000   | 3                         | FAIL                   | FAIL        | FAIL      | FAIL               | NA          | NA           | NA         |
| chr19                     | 2                         | FAIL                   | NA          | NA        | NA                 | NA          | NA           | NA         |
| chr20                     | 0                         | FAIL                   | NA          | NA        | NA                 | NA          | NA           | NA         |
| chr21                     | 0                         | FAIL                   | NA          | NA        | NA                 | NA          | NA           | NA         |
| chr22                     | 0                         | FAIL                   | NA          | NA        | NA                 | NA          | NA           | NA         |
| chrX                      | 0                         | FAIL                   | NA          | NA        | NA                 | NA          | NA           | NA         |
| chrY                      | 0                         | FAIL                   | NA          | NA        | NA                 | NA          | NA           | NA         |

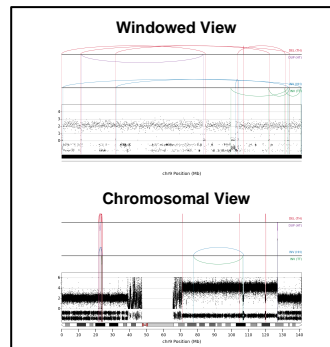



|                         | Total Pass:<br>Chromosome(s) | Window ID<br>with >= 8 SV | Window<br>Join | Window<br>AR | Window<br>Oscillation | Window<br>Type | Window<br>Chain                                     | Overall    |
|-------------------------|------------------------------|---------------------------|----------------|--------------|-----------------------|----------------|-----------------------------------------------------|------------|
| chr1:3973751-80101792   | 6                            | FAIL                      | PASS           | PASS         | PASS                  | inter          | NA                                                  | Event(CR2) |
| chr2                    | 0                            | FAIL                      | NA             | NA           | NA                    | NA             | NA                                                  | NA         |
| chr3                    | 0                            | FAIL                      | NA             | NA           | NA                    | NA             | NA                                                  | NA         |
| chr4                    | 0                            | FAIL                      | NA             | NA           | NA                    | NA             | NA                                                  | NA         |
| chr5                    | 0                            | FAIL                      | NA             | NA           | NA                    | NA             | NA                                                  | NA         |
| chr6                    | 0                            | FAIL                      | NA             | NA           | NA                    | NA             | NA                                                  | NA         |
| chr7                    | 0                            | FAIL                      | NA             | NA           | NA                    | NA             | NA                                                  | NA         |
| chr8:48335609-138820342 | 3                            | FAIL                      | PASS           | FAIL         | FAIL                  | chain          | chr19:18873975-52443284,<br>chr8:48335609-138820342 | NA         |
| chr9                    | 0                            | FAIL                      | NA             | NA           | NA                    | NA             | NA                                                  | NA         |
| chr10                   | 0                            | FAIL                      | NA             | NA           | NA                    | NA             | NA                                                  | NA         |
| chr11                   | 0                            | FAIL                      | NA             | NA           | NA                    | NA             | NA                                                  | NA         |
| chr12                   | 0                            | FAIL                      | NA             | NA           | NA                    | NA             | NA                                                  | NA         |
| chr13                   | 0                            | FAIL                      | NA             | NA           | NA                    | NA             | NA                                                  | NA         |
| chr14                   | 1                            | FAIL                      | NA             | NA           | NA                    | NA             | NA                                                  | NA         |
| chr15                   | 0                            | FAIL                      | NA             | NA           | NA                    | NA             | NA                                                  | NA         |
| chr16                   | 0                            | FAIL                      | NA             | NA           | NA                    | NA             | NA                                                  | NA         |
| chr17                   | 0                            | FAIL                      | NA             | NA           | NA                    | NA             | NA                                                  | NA         |
| chr18:24292322-24305354 | 0                            | FAIL                      | FAIL           | FAIL         | FAIL                  | NA             | NA                                                  | NA         |
| chr19:18873975-52443284 | 3                            | FAIL                      | FAIL           | PASS         | FAIL                  | chain          | chr19:18873975-52443284,<br>chr8:48335609-138820342 | NA         |
| chr19:54477606-56800996 | 3                            | FAIL                      | FAIL           | FAIL         | FAIL                  | NA             | NA                                                  | NA         |
| chr20                   | 0                            | FAIL                      | NA             | NA           | NA                    | NA             | NA                                                  | NA         |
| chr21                   | 0                            | FAIL                      | NA             | NA           | NA                    | NA             | NA                                                  | NA         |
| chr22                   | 0                            | FAIL                      | NA             | NA           | NA                    | NA             | NA                                                  | NA         |
| chrX                    | 0                            | FAIL                      | NA             | NA           | NA                    | NA             | NA                                                  | NA         |
| chrY                    | 0                            | FAIL                      | NA             | NA           | NA                    | NA             | NA                                                  | NA         |

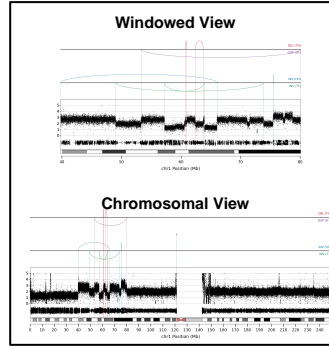

|                          | Total Pass:<br>Chromosome(s) | Window ID<br>with >= 8 SV | Window<br>Join | Window<br>AR | Window<br>Oscillation | Window<br>Type | Window<br>Chain                                     | Overall    |
|--------------------------|------------------------------|---------------------------|----------------|--------------|-----------------------|----------------|-----------------------------------------------------|------------|
| chr1:73460809-232273199  | 5                            | PASS                      | PASS           | PASS         | PASS                  | chain          | chr15:9856222-98598061,<br>chr1:73460809-232273199  | Event(CR1) |
| chr1:242686001-245595000 | 5                            | FAIL                      | FAIL           | FAIL         | PASS                  | NA             | NA                                                  | NA         |
| chr2                     | 0                            | FAIL                      | NA             | NA           | NA                    | NA             | NA                                                  | NA         |
| chr3                     | 0                            | FAIL                      | NA             | NA           | NA                    | NA             | NA                                                  | NA         |
| chr4:68457085-75664682   | 1                            | FAIL                      | PASS           | FAIL         | FAIL                  | chain          | chr4:68457085-75664682,<br>chr6:116921601-117653161 | NA         |
| chr5                     | 0                            | FAIL                      | NA             | NA           | NA                    | NA             | NA                                                  | NA         |
| chr6:116921601-117653161 | 2                            | FAIL                      | PASS           | FAIL         | FAIL                  | chain          | chr4:68457085-75664682,<br>chr6:116921601-117653161 | NA         |
| chr7                     | 0                            | FAIL                      | NA             | NA           | NA                    | NA             | NA                                                  | NA         |
| chr8:32194001-32591222   | 3                            | FAIL                      | PASS           | FAIL         | FAIL                  | chain          | chr11:55409115-55704014,<br>chr8:32194001-32591222  | NA         |
| chr9                     | 0                            | FAIL                      | NA             | NA           | NA                    | NA             | NA                                                  | NA         |
| chr10                    | 0                            | FAIL                      | NA             | NA           | NA                    | NA             | NA                                                  | NA         |
| chr11:55409115-55704014  | 0                            | FAIL                      | FAIL           | FAIL         | FAIL                  | chain          | chr11:55409115-55704014,<br>chr8:32194001-32591222  | NA         |
| chr12:43757906-74671000  | 0                            | FAIL                      | FAIL           | FAIL         | FAIL                  | NA             | NA                                                  | NA         |
| chr13                    | 0                            | FAIL                      | NA             | NA           | NA                    | NA             | NA                                                  | NA         |
| chr14                    | 0                            | FAIL                      | NA             | NA           | NA                    | NA             | NA                                                  | NA         |
| chr15:9856222-98598061   | 2                            | FAIL                      | PASS           | FAIL         | FAIL                  | chain          | chr15:9856222-98598061,<br>chr1:73460809-232273199  | Event(CR1) |
| chr16                    | 0                            | FAIL                      | NA             | NA           | NA                    | NA             | NA                                                  | NA         |
| chr17                    | 0                            | FAIL                      | NA             | NA           | NA                    | NA             | NA                                                  | NA         |
| chr18                    | 0                            | FAIL                      | NA             | NA           | NA                    | NA             | NA                                                  | NA         |
| chr19                    | 0                            | FAIL                      | NA             | NA           | NA                    | NA             | NA                                                  | NA         |
| chr20                    | 0                            | FAIL                      | NA             | NA           | NA                    | NA             | NA                                                  | NA         |
| chr21                    | 0                            | FAIL                      | NA             | NA           | NA                    | NA             | NA                                                  | NA         |
| chr22                    | 0                            | FAIL                      | NA             | NA           | NA                    | NA             | NA                                                  | NA         |
| chrX                     | 0                            | FAIL                      | NA             | NA           | NA                    | NA             | NA                                                  | NA         |
| chrY                     | 0                            | FAIL                      | NA             | NA           | NA                    | NA             | NA                                                  | NA         |

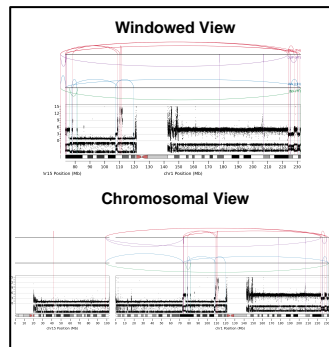

|                          | Total Pass: Chromosome(s) | Window ID with >= 8 SV | Window Join | Window AR | Window Oscillation | Window Type | Window Chain                                                            | Overall    |
|--------------------------|---------------------------|------------------------|-------------|-----------|--------------------|-------------|-------------------------------------------------------------------------|------------|
| chr1                     | 0                         | FAIL                   | NA          | NA        | NA                 | NA          | NA                                                                      | NA         |
| chr2:19660724-21722200   | 1                         | FAIL                   | FAIL        | FAIL      | FAIL               | chain       | chr17:22218711-80138542, chr2:19660724-21722200, chr8:38113754-14422900 | Event(CR1) |
| chr3                     | 0                         | FAIL                   | NA          | NA        | NA                 | NA          | NA                                                                      | NA         |
| chr4                     | 0                         | FAIL                   | NA          | NA        | NA                 | NA          | NA                                                                      | NA         |
| chr5                     | 0                         | FAIL                   | NA          | NA        | NA                 | NA          | NA                                                                      | NA         |
| chr6:52960075-53171041   | 2                         | FAIL                   | FAIL        | FAIL      | FAIL               | NA          | NA                                                                      | NA         |
| chr7                     | 0                         | FAIL                   | NA          | NA        | NA                 | NA          | NA                                                                      | NA         |
| chr8:38113754-14422900   | 6                         | PASS                   | PASS        | PASS      | PASS               | chain       | chr17:22218711-80138542, chr2:19660724-21722200, chr8:38113754-14422900 | Event(CR1) |
| chr9                     | 1                         | FAIL                   | NA          | NA        | NA                 | NA          | NA                                                                      | NA         |
| chr10                    | 0                         | FAIL                   | NA          | NA        | NA                 | NA          | NA                                                                      | NA         |
| chr11:609292-5813000     | 6                         | PASS                   | PASS        | PASS      | PASS               | inter       | NA                                                                      | Event(CR1) |
| chr12:31159318-84140077  | 6                         | PASS                   | PASS        | PASS      | PASS               | inter       | NA                                                                      | Event(CR1) |
| chr13                    | 0                         | FAIL                   | NA          | NA        | NA                 | NA          | NA                                                                      | NA         |
| chr14                    | 0                         | FAIL                   | NA          | NA        | NA                 | NA          | NA                                                                      | NA         |
| chr15                    | 0                         | FAIL                   | NA          | NA        | NA                 | NA          | NA                                                                      | NA         |
| chr16                    | 0                         | FAIL                   | NA          | NA        | NA                 | NA          | NA                                                                      | NA         |
| chr17:22218711-80138542  | 6                         | PASS                   | PASS        | PASS      | PASS               | chain       | chr17:22218711-80138542, chr2:19660724-21722200, chr8:38113754-14422900 | Event(CR1) |
| chr18:1941225-25433313   | 5                         | PASS                   | PASS        | PASS      | FAIL               | inter       | NA                                                                      | Event(CR1) |
| chr19                    | 1                         | FAIL                   | NA          | NA        | NA                 | NA          | NA                                                                      | NA         |
| chr20:1085001-30782148   | 5                         | PASS                   | PASS        | PASS      | FAIL               | chain       | chr20:1085001-30782148, chr21:23450001-28404816                         | Event(CR1) |
| chr21:23450001-28404816  | 3                         | FAIL                   | PASS        | PASS      | FAIL               | chain       | chr20:1085001-30782148, chr21:23450001-28404816                         | Event(CR1) |
| chr22                    | 0                         | FAIL                   | NA          | NA        | NA                 | NA          | NA                                                                      | NA         |
| chrX:100871747-100883885 | 1                         | FAIL                   | FAIL        | FAIL      | FAIL               | NA          | NA                                                                      | NA         |
| chrY                     | 0                         | FAIL                   | NA          | NA        | NA                 | NA          | NA                                                                      | NA         |

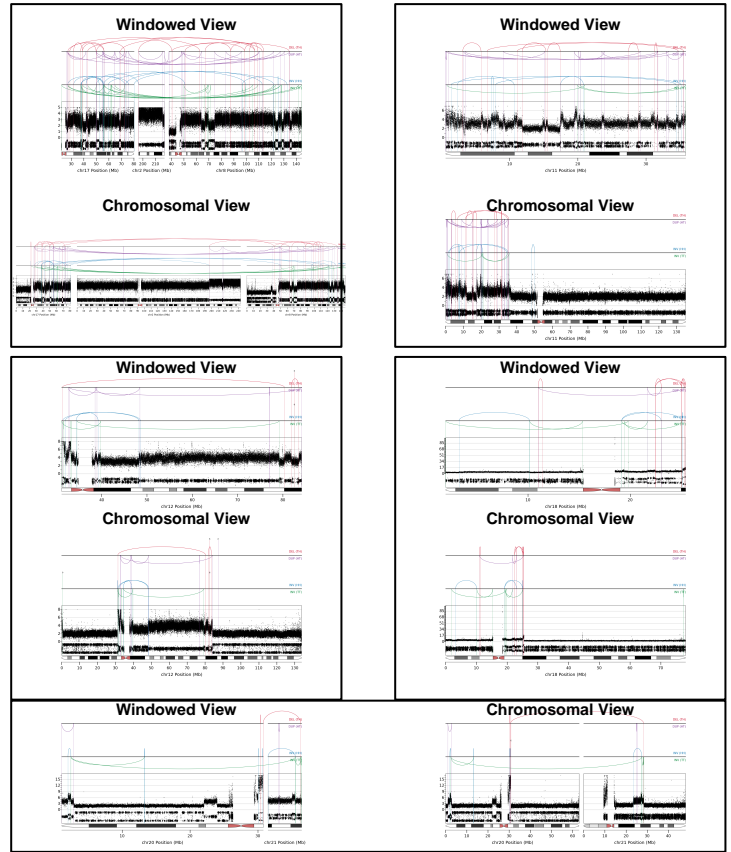

|                         | Total Pass: Chromosome(s) | Window ID with >= 8 SV | Window Join | Window AR | Window Oscillation | Window Type | Window Chain                                     | Overall    |
|-------------------------|---------------------------|------------------------|-------------|-----------|--------------------|-------------|--------------------------------------------------|------------|
| chr1                    | 0                         | FAIL                   | NA          | NA        | NA                 | NA          | NA                                               | NA         |
| chr2                    | 0                         | FAIL                   | NA          | NA        | NA                 | NA          | NA                                               | NA         |
| chr3:78615001-177579163 | 6                         | PASS                   | PASS        | PASS      | PASS               | inter       | NA                                               | Event(CR1) |
| chr4                    | 0                         | FAIL                   | NA          | NA        | NA                 | NA          | NA                                               | NA         |
| chr5                    | 0                         | FAIL                   | NA          | NA        | NA                 | NA          | NA                                               | NA         |
| chr6                    | 0                         | FAIL                   | NA          | NA        | NA                 | NA          | NA                                               | NA         |
| chr7                    | 0                         | FAIL                   | NA          | NA        | NA                 | NA          | NA                                               | NA         |
| chr8                    | 0                         | FAIL                   | NA          | NA        | NA                 | NA          | NA                                               | NA         |
| chr9:13293001-24336000  | 6                         | FAIL                   | FAIL        | FAIL      | PASS               | NA          | NA                                               | NA         |
| chr10                   | 0                         | FAIL                   | NA          | NA        | NA                 | NA          | NA                                               | NA         |
| chr11                   | 0                         | FAIL                   | NA          | NA        | NA                 | NA          | NA                                               | NA         |
| chr12                   | 1                         | FAIL                   | NA          | NA        | NA                 | NA          | NA                                               | NA         |
| chr13                   | 0                         | FAIL                   | NA          | NA        | NA                 | NA          | NA                                               | NA         |
| chr14                   | 0                         | FAIL                   | NA          | NA        | NA                 | NA          | NA                                               | NA         |
| chr15                   | 0                         | FAIL                   | NA          | NA        | NA                 | NA          | NA                                               | NA         |
| chr16:11069001-11632000 | 1                         | FAIL                   | FAIL        | FAIL      | FAIL               | NA          | NA                                               | NA         |
| chr17:18551356-18821120 | 1                         | FAIL                   | FAIL        | FAIL      | FAIL               | NA          | NA                                               | NA         |
| chr18:20437643-20912000 | 1                         | FAIL                   | FAIL        | FAIL      | FAIL               | chain       | chr18:20437643-20912000, chr21:14614168-20675153 | NA         |
| chr19                   | 0                         | FAIL                   | NA          | NA        | NA                 | NA          | NA                                               | NA         |
| chr20                   | 0                         | FAIL                   | NA          | NA        | NA                 | NA          | NA                                               | NA         |
| chr21:14614168-20675153 | 2                         | FAIL                   | FAIL        | FAIL      | FAIL               | chain       | chr18:20437643-20912000, chr21:14614168-20675153 | NA         |
| chr22:26201479-46445513 | 4                         | FAIL                   | PASS        | PASS      | FAIL               | inter       | NA                                               | NA         |
| chrX                    | 0                         | FAIL                   | NA          | NA        | NA                 | NA          | NA                                               | NA         |
| chrY                    | 0                         | FAIL                   | NA          | NA        | NA                 | NA          | NA                                               | NA         |

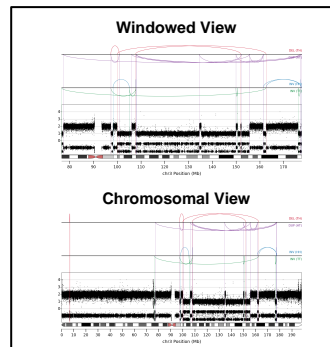

|                         | Total Pass-<br>Chromosome(s) | Window ID<br>with >= 8 SV | Window<br>Join | Window<br>AR | Window<br>Oscillation | Window<br>Type | Window<br>Chain                                | Overall    |
|-------------------------|------------------------------|---------------------------|----------------|--------------|-----------------------|----------------|------------------------------------------------|------------|
| chr1                    | 1                            | FAIL                      | NA             | NA           | NA                    | NA             | NA                                             | NA         |
| chr2                    | 0                            | FAIL                      | NA             | NA           | NA                    | NA             | NA                                             | NA         |
| chr3                    | 2                            | FAIL                      | NA             | NA           | NA                    | NA             | NA                                             | NA         |
| chr4                    | 0                            | FAIL                      | NA             | NA           | NA                    | NA             | NA                                             | NA         |
| chr5                    | 0                            | FAIL                      | NA             | NA           | NA                    | NA             | NA                                             | NA         |
| chr6                    | 0                            | FAIL                      | NA             | NA           | NA                    | NA             | NA                                             | NA         |
| chr7                    | 0                            | FAIL                      | NA             | NA           | NA                    | NA             | NA                                             | NA         |
| chr8                    | 4                            | FAIL                      | NA             | NA           | NA                    | NA             | NA                                             | NA         |
| chr9:5829446-36871593   | 5                            | PASS                      | PKSS           | PASS         | FAIL                  | chain          | chr9:5829446-36871593,<br>chrY:5964707-7152459 | Event(CR1) |
| chr10                   | 0                            | FAIL                      | NA             | NA           | NA                    | NA             | NA                                             | NA         |
| chr11:50463829-50477052 | 0                            | FAIL                      | FAIL           | FAIL         | FAIL                  | NA             | NA                                             | NA         |
| chr12                   | 0                            | FAIL                      | NA             | NA           | NA                    | NA             | NA                                             | NA         |
| chr13                   | 0                            | FAIL                      | NA             | NA           | NA                    | NA             | NA                                             | NA         |
| chr14                   | 0                            | FAIL                      | NA             | NA           | NA                    | NA             | NA                                             | NA         |
| chr15                   | 0                            | FAIL                      | NA             | NA           | NA                    | NA             | NA                                             | NA         |
| chr16                   | 0                            | FAIL                      | NA             | NA           | NA                    | NA             | NA                                             | NA         |
| chr17:41481001-42624631 | 5                            | FAIL                      | PKSS           | FAIL         | FAIL                  | NA             | NA                                             | NA         |
| chr17:43133716-48320000 | 5                            | FAIL                      | FAIL           | FAIL         | FAIL                  | NA             | NA                                             | NA         |
| chr18:18684332-27590000 | 4                            | FAIL                      | PKSS           | FAIL         | FAIL                  | inter          | NA                                             | NA         |
| chr19                   | 0                            | FAIL                      | NA             | NA           | NA                    | NA             | NA                                             | NA         |
| chr20                   | 1                            | FAIL                      | NA             | NA           | NA                    | NA             | NA                                             | NA         |
| chr21                   | 0                            | FAIL                      | NA             | NA           | NA                    | NA             | NA                                             | NA         |
| chr22                   | 0                            | FAIL                      | NA             | NA           | NA                    | NA             | NA                                             | NA         |
| chrX                    | 0                            | FAIL                      | NA             | NA           | NA                    | NA             | NA                                             | NA         |
| chrY:5964707-7152459    | 1                            | FAIL                      | PKSS           | FAIL         | FAIL                  | chain          | chr9:5829446-36871593,<br>chrY:5964707-7152459 | Event(CR1) |

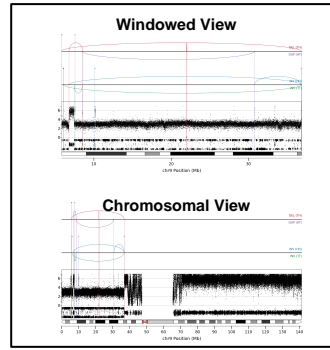

|                          | Total Pass-<br>Chromosome(s) | Window ID<br>with >= 8 SV | Window<br>Join | Window<br>AR | Window<br>Oscillation | Window<br>Type | Window<br>Chain                                      | Overall    |
|--------------------------|------------------------------|---------------------------|----------------|--------------|-----------------------|----------------|------------------------------------------------------|------------|
| chr1                     | 0                            | FAIL                      | NA             | NA           | NA                    | NA             | NA                                                   | NA         |
| chr2                     | 0                            | FAIL                      | NA             | NA           | NA                    | NA             | NA                                                   | NA         |
| chr3                     | 0                            | FAIL                      | NA             | NA           | NA                    | NA             | NA                                                   | NA         |
| chr4                     | 0                            | FAIL                      | NA             | NA           | NA                    | NA             | NA                                                   | NA         |
| chr5                     | 0                            | FAIL                      | NA             | NA           | NA                    | NA             | NA                                                   | NA         |
| chr6                     | 0                            | FAIL                      | NA             | NA           | NA                    | NA             | NA                                                   | NA         |
| chr7:99434749-103133163  | 4                            | FAIL                      | FAIL           | FAIL         | FAIL                  | NA             | NA                                                   | NA         |
| chr8                     | 0                            | FAIL                      | NA             | NA           | NA                    | NA             | NA                                                   | NA         |
| chr9                     | 0                            | FAIL                      | NA             | NA           | NA                    | NA             | NA                                                   | NA         |
| chr10:85219786-87399031  | 0                            | FAIL                      | FAIL           | FAIL         | FAIL                  | NA             | NA                                                   | NA         |
| chr11                    | 0                            | FAIL                      | NA             | NA           | NA                    | NA             | NA                                                   | NA         |
| chr12                    | 0                            | FAIL                      | NA             | NA           | NA                    | NA             | NA                                                   | NA         |
| chr13                    | 0                            | FAIL                      | NA             | NA           | NA                    | NA             | NA                                                   | NA         |
| chr14:21416378-105660885 | 5                            | PASS                      | PASS           | PASS         | FAIL                  | chain          | chr14:21416378-105660885,<br>chr21:21937611-44860077 | Event(CR1) |
| chr15                    | 0                            | FAIL                      | NA             | NA           | NA                    | NA             | NA                                                   | NA         |
| chr16                    | 0                            | FAIL                      | NA             | NA           | NA                    | NA             | NA                                                   | NA         |
| chr17                    | 0                            | FAIL                      | NA             | NA           | NA                    | NA             | NA                                                   | NA         |
| chr18                    | 0                            | FAIL                      | NA             | NA           | NA                    | NA             | NA                                                   | NA         |
| chr19                    | 0                            | FAIL                      | NA             | NA           | NA                    | NA             | NA                                                   | NA         |
| chr20                    | 0                            | FAIL                      | NA             | NA           | NA                    | NA             | NA                                                   | NA         |
| chr21:21937611-44860077  | 3                            | FAIL                      | PASS           | FAIL         | FAIL                  | chain          | chr14:21416378-105660885,<br>chr21:21937611-44860077 | Event(CR1) |
| chr22                    | 0                            | FAIL                      | NA             | NA           | NA                    | NA             | NA                                                   | NA         |
| chrX                     | 0                            | FAIL                      | NA             | NA           | NA                    | NA             | NA                                                   | NA         |
| chrY                     | 0                            | FAIL                      | NA             | NA           | NA                    | NA             | NA                                                   | NA         |

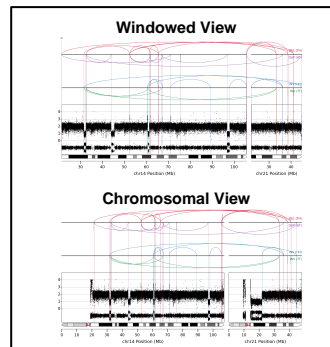

|                         | Total Pass: Chromosome(s) | Window ID with >= 8 SV | Window Join | Window AR | Window Oscillation | Window Type | Window Chain                                     | Overall    |
|-------------------------|---------------------------|------------------------|-------------|-----------|--------------------|-------------|--------------------------------------------------|------------|
| chr1                    | 0                         | FAIL                   | NA          | NA        | NA                 | NA          | NA                                               | NA         |
| chr2                    | 0                         | FAIL                   | NA          | NA        | NA                 | NA          | NA                                               | NA         |
| chr3:87979008-90293128  | 0                         | FAIL                   | FAIL        | FAIL      | FAIL               | chain       | chr3:87979008-90293128, chrX:67514117-68859055   | NA         |
| chr4                    | 0                         | FAIL                   | NA          | NA        | NA                 | NA          | NA                                               | NA         |
| chr5                    | 0                         | FAIL                   | NA          | NA        | NA                 | NA          | NA                                               | NA         |
| chr6:12719001-92777454  | 6                         | PASS                   | PASS        | PASS      | PASS               | inter       | NA                                               | Event(CR1) |
| chr7                    | 0                         | FAIL                   | NA          | NA        | NA                 | NA          | NA                                               | NA         |
| chr8                    | 0                         | FAIL                   | NA          | NA        | NA                 | NA          | NA                                               | NA         |
| chr9                    | 0                         | FAIL                   | NA          | NA        | NA                 | NA          | NA                                               | NA         |
| chr10                   | 0                         | FAIL                   | NA          | NA        | NA                 | NA          | NA                                               | NA         |
| chr11                   | 0                         | FAIL                   | NA          | NA        | NA                 | NA          | NA                                               | NA         |
| chr12                   | 0                         | FAIL                   | NA          | NA        | NA                 | NA          | NA                                               | NA         |
| chr13                   | 0                         | FAIL                   | NA          | NA        | NA                 | NA          | NA                                               | NA         |
| chr14                   | 0                         | FAIL                   | NA          | NA        | NA                 | NA          | NA                                               | NA         |
| chr15                   | 0                         | FAIL                   | NA          | NA        | NA                 | NA          | NA                                               | NA         |
| chr16:4864089-22303037  | 3                         | FAIL                   | FAIL        | PASS      | FAIL               | inter       | NA                                               | NA         |
| chr17                   | 0                         | FAIL                   | NA          | NA        | NA                 | NA          | NA                                               | NA         |
| chr18:18671973-28949847 | 5                         | FAIL                   | PASS        | PASS      | PASS               | chain       | chr18:18671973-28949847, chr19:55976863-57693531 | NA         |
| chr19:55976863-57693531 | 4                         | FAIL                   | FAIL        | FAIL      | FAIL               | chain       | chr18:18671973-28949847, chr19:55976863-57693531 | NA         |
| chr20                   | 0                         | FAIL                   | NA          | NA        | NA                 | NA          | NA                                               | NA         |
| chr21                   | 0                         | FAIL                   | NA          | NA        | NA                 | NA          | NA                                               | NA         |
| chr22                   | 0                         | FAIL                   | NA          | NA        | NA                 | NA          | NA                                               | NA         |
| chrX:67514117-68859055  | 0                         | FAIL                   | FAIL        | FAIL      | FAIL               | chain       | chr3:87979008-90293128, chrX:67514117-68859055   | NA         |
| chrY                    | 0                         | FAIL                   | NA          | NA        | NA                 | NA          | NA                                               | NA         |

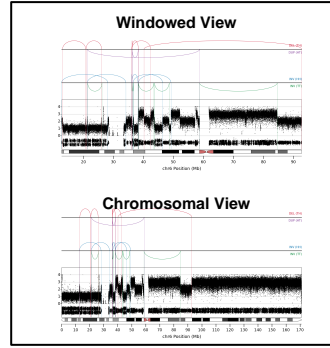

|                          | Total Pass: Chromosome(s) | Window ID with >= 8 SV | Window Join | Window AR | Window Oscillation | Window Type | Window Chain                                                               | Overall    |
|--------------------------|---------------------------|------------------------|-------------|-----------|--------------------|-------------|----------------------------------------------------------------------------|------------|
| chr1:213207691-213955670 | 2                         | FAIL                   | FAIL        | FAIL      | FAIL               | chain       | chr19:37007892-37279000, chr1:213207691-213955670                          | NA         |
| chr2                     | 2                         | FAIL                   | NA          | NA        | NA                 | NA          | NA                                                                         | NA         |
| chr3                     | 2                         | FAIL                   | NA          | NA        | NA                 | NA          | NA                                                                         | NA         |
| chr4:163371078-171983568 | 4                         | FAIL                   | FAIL        | FAIL      | FAIL               | NA          | NA                                                                         | NA         |
| chr4:172916001-190563794 | 4                         | FAIL                   | FAIL        | FAIL      | FAIL               | chain       | chr11:22650591-39031524, chr4:172916001-190563794, chr8:91456279-130665095 | Event(CR2) |
| chr5:163352841-163546999 | 3                         | FAIL                   | FAIL        | FAIL      | FAIL               | NA          | NA                                                                         | NA         |
| chr6                     | 0                         | FAIL                   | NA          | NA        | NA                 | NA          | NA                                                                         | NA         |
| chr7                     | 0                         | FAIL                   | NA          | NA        | NA                 | NA          | NA                                                                         | NA         |
| chr8:91456279-130665095  | 1                         | FAIL                   | FAIL        | FAIL      | FAIL               | chain       | chr11:22650591-39031524, chr4:172916001-190563794, chr8:91456279-130665095 | Event(CR2) |
| chr9                     | 1                         | FAIL                   | NA          | NA        | NA                 | NA          | NA                                                                         | NA         |
| chr10                    | 0                         | FAIL                   | NA          | NA        | NA                 | NA          | NA                                                                         | NA         |
| chr11:22650591-39031524  | 5                         | FAIL                   | PASS        | PASS      | PASS               | chain       | chr11:22650591-39031524, chr4:172916001-190563794, chr8:91456279-130665095 | Event(CR2) |
| chr12                    | 2                         | FAIL                   | NA          | NA        | NA                 | NA          | NA                                                                         | NA         |
| chr13                    | 0                         | FAIL                   | NA          | NA        | NA                 | NA          | NA                                                                         | NA         |
| chr14                    | 0                         | FAIL                   | NA          | NA        | NA                 | NA          | NA                                                                         | NA         |
| chr15:86478889-87068583  | 3                         | FAIL                   | FAIL        | FAIL      | FAIL               | NA          | NA                                                                         | NA         |
| chr15:91848856-102426272 | 3                         | FAIL                   | PASS        | FAIL      | FAIL               | NA          | NA                                                                         | NA         |
| chr16                    | 0                         | FAIL                   | NA          | NA        | NA                 | NA          | NA                                                                         | NA         |
| chr17                    | 0                         | FAIL                   | NA          | NA        | NA                 | NA          | NA                                                                         | NA         |
| chr18                    | 4                         | FAIL                   | NA          | NA        | NA                 | NA          | NA                                                                         | NA         |
| chr19:30007505-30154161  | 1                         | FAIL                   | FAIL        | FAIL      | FAIL               | NA          | NA                                                                         | NA         |
| chr19:37007892-37279000  | 1                         | FAIL                   | FAIL        | FAIL      | FAIL               | chain       | chr19:37007892-37279000, chr1:213207691-213955670                          | NA         |
| chr20                    | 0                         | FAIL                   | NA          | NA        | NA                 | NA          | NA                                                                         | NA         |
| chr21                    | 0                         | FAIL                   | NA          | NA        | NA                 | NA          | NA                                                                         | NA         |
| chr22                    | 0                         | FAIL                   | NA          | NA        | NA                 | NA          | NA                                                                         | NA         |
| chrX                     | 0                         | FAIL                   | NA          | NA        | NA                 | NA          | NA                                                                         | NA         |
| chrY                     | 0                         | FAIL                   | NA          | NA        | NA                 | NA          | NA                                                                         | NA         |

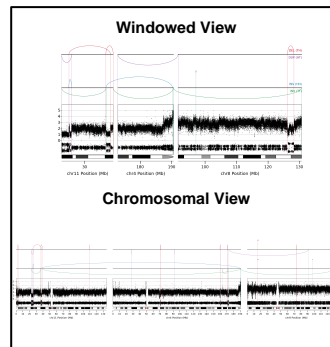

PCSI\_0549\_Pa\_P\_5266

PCSI\_0549\_Pa\_P\_5266

|                          | Total Pass:<br>Chromosome(s) | Window ID<br>with >= 8 SV | Window<br>Join | Window<br>AR | Window<br>Oscillation | Window<br>Type | Window<br>Chain                                  | Overall    |
|--------------------------|------------------------------|---------------------------|----------------|--------------|-----------------------|----------------|--------------------------------------------------|------------|
| chr1:176524929-210742879 | 4                            | FAIL                      | PASS           | PASS         | PASS                  | inter          | NA                                               | Event(CR2) |
| chr2                     | 0                            | FAIL                      | NA             | NA           | NA                    | NA             | NA                                               | NA         |
| chr3                     | 0                            | FAIL                      | NA             | NA           | NA                    | NA             | NA                                               | NA         |
| chr4                     | 0                            | FAIL                      | NA             | NA           | NA                    | NA             | NA                                               | NA         |
| chr5                     | 0                            | FAIL                      | NA             | NA           | NA                    | NA             | NA                                               | NA         |
| chr6                     | 0                            | FAIL                      | NA             | NA           | NA                    | NA             | NA                                               | NA         |
| chr7:631233-54238000     | 5                            | PASS                      | PASS           | PASS         | PASS                  | chain          | chr21:18230493-47379696,<br>chr7:631233-54238000 | Event(CR1) |
| chr8                     | 0                            | FAIL                      | NA             | NA           | NA                    | NA             | NA                                               | NA         |
| chr9                     | 0                            | FAIL                      | NA             | NA           | NA                    | NA             | NA                                               | NA         |
| chr10                    | 0                            | FAIL                      | NA             | NA           | NA                    | NA             | NA                                               | NA         |
| chr11:22006807-3820423   | 1                            | FAIL                      | FAIL           | FAIL         | FAIL                  | NA             | NA                                               | NA         |
| chr12:7109001-58129482   | 5                            | PASS                      | PASS           | PASS         | FAIL                  | NA             | NA                                               | NA         |
| chr13                    | 0                            | FAIL                      | NA             | NA           | NA                    | NA             | NA                                               | NA         |
| chr14:47103448-77034705  | 0                            | FAIL                      | FAIL           | FAIL         | FAIL                  | NA             | NA                                               | NA         |
| chr15                    | 0                            | FAIL                      | NA             | NA           | NA                    | NA             | NA                                               | NA         |
| chr16                    | 0                            | FAIL                      | NA             | NA           | NA                    | NA             | NA                                               | NA         |
| chr17                    | 0                            | FAIL                      | NA             | NA           | NA                    | NA             | NA                                               | NA         |
| chr18                    | 0                            | FAIL                      | NA             | NA           | NA                    | NA             | NA                                               | NA         |
| chr19                    | 0                            | FAIL                      | NA             | NA           | NA                    | NA             | NA                                               | NA         |
| chr20:16602001-23005338  | 4                            | FAIL                      | FAIL           | FAIL         | PASS                  | NA             | NA                                               | NA         |
| chr21:18230493-47379696  | 5                            | PASS                      | PASS           | PASS         | PASS                  | chain          | chr21:18230493-47379696,<br>chr7:631233-54238000 | Event(CR1) |
| chr22                    | 0                            | FAIL                      | NA             | NA           | NA                    | NA             | NA                                               | NA         |
| chrX                     | 0                            | FAIL                      | NA             | NA           | NA                    | NA             | NA                                               | NA         |
| chrY                     | 0                            | FAIL                      | NA             | NA           | NA                    | NA             | NA                                               | NA         |

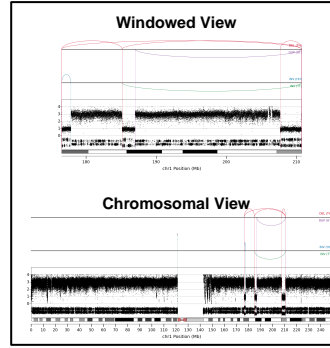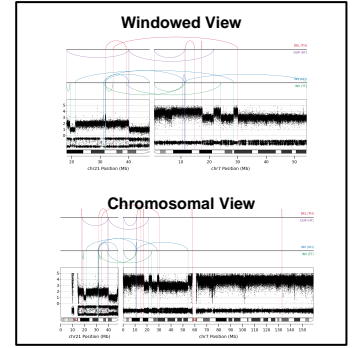

PCSI\_0572\_Pa\_P\_526

PCSI\_0572\_Pa\_P\_526

|                           | Total Pass:<br>Chromosome(s) | Window ID<br>with >= 8 SV | Window<br>Join | Window<br>AR | Window<br>Oscillation | Window<br>Type | Window<br>Chain                                                                                             | Overall    |
|---------------------------|------------------------------|---------------------------|----------------|--------------|-----------------------|----------------|-------------------------------------------------------------------------------------------------------------|------------|
| chr1:10146742-114793741   | 5                            | PASS                      | PASS           | PASS         | FAIL                  | chain          | chr14:103400154-103424480,<br>chr19:4006241-4925261,<br>chr1:10146742-114793741,<br>chr2:21945001-110881941 | Event(CR1) |
| chr2:21945001-110881941   | 6                            | PASS                      | PASS           | PASS         | PASS                  | chain          | chr14:103400154-103424480,<br>chr19:4006241-4925261,<br>chr1:10146742-114793741,<br>chr2:21945001-110881941 | Event(CR1) |
| chr3                      | 0                            | FAIL                      | NA             | NA           | NA                    | NA             | NA                                                                                                          | NA         |
| chr4                      | 0                            | FAIL                      | NA             | NA           | NA                    | NA             | NA                                                                                                          | NA         |
| chr5                      | 0                            | FAIL                      | NA             | NA           | NA                    | NA             | NA                                                                                                          | NA         |
| chr6                      | 0                            | FAIL                      | NA             | NA           | NA                    | NA             | NA                                                                                                          | NA         |
| chr7                      | 0                            | FAIL                      | NA             | NA           | NA                    | NA             | NA                                                                                                          | NA         |
| chr8                      | 0                            | FAIL                      | NA             | NA           | NA                    | NA             | NA                                                                                                          | NA         |
| chr9                      | 0                            | FAIL                      | NA             | NA           | NA                    | NA             | NA                                                                                                          | NA         |
| chr10                     | 0                            | FAIL                      | NA             | NA           | NA                    | NA             | NA                                                                                                          | NA         |
| chr11                     | 0                            | FAIL                      | NA             | NA           | NA                    | NA             | NA                                                                                                          | NA         |
| chr12                     | 0                            | FAIL                      | NA             | NA           | NA                    | NA             | NA                                                                                                          | NA         |
| chr13                     | 0                            | FAIL                      | NA             | NA           | NA                    | NA             | NA                                                                                                          | NA         |
| chr14:102327001-102567606 | 1                            | FAIL                      | FAIL           | FAIL         | FAIL                  | NA             | NA                                                                                                          | NA         |
| chr14:103400154-103424480 | 1                            | FAIL                      | FAIL           | FAIL         | FAIL                  | chain          | chr14:103400154-103424480,<br>chr19:4006241-4925261,<br>chr1:10146742-114793741,<br>chr2:21945001-110881941 | Event(CR1) |
| chr15                     | 0                            | FAIL                      | NA             | NA           | NA                    | NA             | NA                                                                                                          | NA         |
| chr16                     | 0                            | FAIL                      | NA             | NA           | NA                    | NA             | NA                                                                                                          | NA         |
| chr17                     | 0                            | FAIL                      | NA             | NA           | NA                    | NA             | NA                                                                                                          | NA         |
| chr18                     | 0                            | FAIL                      | NA             | NA           | NA                    | NA             | NA                                                                                                          | NA         |
| chr19:4006241-4925261     | 0                            | FAIL                      | FAIL           | FAIL         | FAIL                  | chain          | chr14:103400154-103424480,<br>chr19:4006241-4925261,<br>chr1:10146742-114793741,<br>chr2:21945001-110881941 | Event(CR1) |
| chr20                     | 0                            | FAIL                      | NA             | NA           | NA                    | NA             | NA                                                                                                          | NA         |
| chr21                     | 0                            | FAIL                      | NA             | NA           | NA                    | NA             | NA                                                                                                          | NA         |
| chr22:38067441-38705578   | 3                            | FAIL                      | PASS           | FAIL         | FAIL                  | inter          | NA                                                                                                          | NA         |
| chrX                      | 0                            | FAIL                      | NA             | NA           | NA                    | NA             | NA                                                                                                          | NA         |
| chrY                      | 0                            | FAIL                      | NA             | NA           | NA                    | NA             | NA                                                                                                          | NA         |

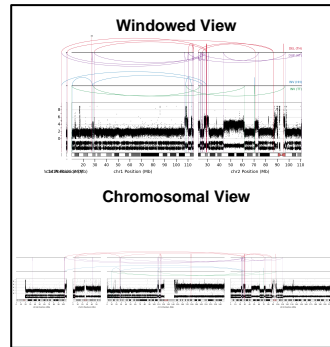

|                        | Total Pass: Chromosome(%) | Window ID with >= 8 SV | Window Join | Window AR | Window Oscillation | Window Type | Window Chain                                  | Overall    |
|------------------------|---------------------------|------------------------|-------------|-----------|--------------------|-------------|-----------------------------------------------|------------|
| chr1                   | 0                         | FAIL                   | NA          | NA        | NA                 | NA          | NA                                            | NA         |
| chr2:4002001-84635426  | 5                         | FAIL                   | PASS        | PASS      | PASS               | chain       | chr2:4002001-84635426, chr4:41895636-66184137 | Event(CR2) |
| chr3                   | 0                         | FAIL                   | NA          | NA        | NA                 | NA          | NA                                            | NA         |
| chr4:13306001-25693000 | 6                         | PASS                   | FAIL        | FAIL      | FAIL               | inter       | NA                                            | NA         |
| chr4:41895636-66184137 | 6                         | FAIL                   | FAIL        | FAIL      | PASS               | chain       | chr2:4002001-84635426, chr4:41895636-66184137 | Event(CR2) |
| chr4:67721001-74846653 | 6                         | FAIL                   | FAIL        | FAIL      | PASS               | NA          | NA                                            | NA         |
| chr5                   | 0                         | FAIL                   | NA          | NA        | NA                 | NA          | NA                                            | NA         |
| chr6:46086001-69047000 | 2                         | FAIL                   | FAIL        | FAIL      | FAIL               | NA          | NA                                            | NA         |
| chr7                   | 0                         | FAIL                   | NA          | NA        | NA                 | NA          | NA                                            | NA         |
| chr8                   | 0                         | FAIL                   | NA          | NA        | NA                 | NA          | NA                                            | NA         |
| chr9                   | 1                         | FAIL                   | NA          | NA        | NA                 | NA          | NA                                            | NA         |
| chr10                  | 0                         | FAIL                   | NA          | NA        | NA                 | NA          | NA                                            | NA         |
| chr11                  | 0                         | FAIL                   | NA          | NA        | NA                 | NA          | NA                                            | NA         |
| chr12                  | 0                         | FAIL                   | NA          | NA        | NA                 | NA          | NA                                            | NA         |
| chr13                  | 0                         | FAIL                   | NA          | NA        | NA                 | NA          | NA                                            | NA         |
| chr14                  | 1                         | FAIL                   | NA          | NA        | NA                 | NA          | NA                                            | NA         |
| chr15                  | 0                         | FAIL                   | NA          | NA        | NA                 | NA          | NA                                            | NA         |
| chr16                  | 0                         | FAIL                   | NA          | NA        | NA                 | NA          | NA                                            | NA         |
| chr17                  | 0                         | FAIL                   | NA          | NA        | NA                 | NA          | NA                                            | NA         |
| chr18                  | 0                         | FAIL                   | NA          | NA        | NA                 | NA          | NA                                            | NA         |
| chr19                  | 0                         | FAIL                   | NA          | NA        | NA                 | NA          | NA                                            | NA         |
| chr20                  | 0                         | FAIL                   | NA          | NA        | NA                 | NA          | NA                                            | NA         |
| chr21                  | 0                         | FAIL                   | NA          | NA        | NA                 | NA          | NA                                            | NA         |
| chr22                  | 0                         | FAIL                   | NA          | NA        | NA                 | NA          | NA                                            | NA         |
| chrX                   | 0                         | FAIL                   | NA          | NA        | NA                 | NA          | NA                                            | NA         |
| chrY                   | 0                         | FAIL                   | NA          | NA        | NA                 | NA          | NA                                            | NA         |

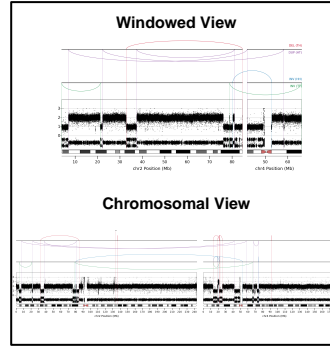

|                         | Total Pass: Chromosome(%) | Window ID with >= 8 SV | Window Join | Window AR | Window Oscillation | Window Type | Window Chain                                   | Overall    |
|-------------------------|---------------------------|------------------------|-------------|-----------|--------------------|-------------|------------------------------------------------|------------|
| chr1                    | 3                         | FAIL                   | NA          | NA        | NA                 | NA          | NA                                             | NA         |
| chr2                    | 4                         | FAIL                   | NA          | NA        | NA                 | NA          | NA                                             | NA         |
| chr3                    | 2                         | FAIL                   | NA          | NA        | NA                 | NA          | NA                                             | NA         |
| chr4                    | 1                         | FAIL                   | NA          | NA        | NA                 | NA          | NA                                             | NA         |
| chr5                    | 4                         | FAIL                   | NA          | NA        | NA                 | NA          | NA                                             | NA         |
| chr6                    | 4                         | FAIL                   | NA          | NA        | NA                 | NA          | NA                                             | NA         |
| chr7                    | 2                         | FAIL                   | NA          | NA        | NA                 | NA          | NA                                             | NA         |
| chr8                    | 1                         | FAIL                   | NA          | NA        | NA                 | NA          | NA                                             | NA         |
| chr9                    | 1                         | FAIL                   | NA          | NA        | NA                 | NA          | NA                                             | NA         |
| chr10                   | 1                         | FAIL                   | NA          | NA        | NA                 | NA          | NA                                             | NA         |
| chr11:60495001-66071000 | 3                         | FAIL                   | FAIL        | FAIL      | FAIL               | chain       | chr11:60495001-66071000, chr16:3985652-7659000 | NA         |
| chr12                   | 1                         | FAIL                   | NA          | NA        | NA                 | NA          | NA                                             | NA         |
| chr13                   | 1                         | FAIL                   | NA          | NA        | NA                 | NA          | NA                                             | NA         |
| chr14                   | 0                         | FAIL                   | NA          | NA        | NA                 | NA          | NA                                             | NA         |
| chr15                   | 1                         | FAIL                   | NA          | NA        | NA                 | NA          | NA                                             | NA         |
| chr16:3985652-7659000   | 5                         | FAIL                   | FAIL        | PASS      | PASS               | chain       | chr11:60495001-66071000, chr16:3985652-7659000 | NA         |
| chr16:9464851-32208716  | 5                         | PASS                   | FAIL        | PASS      | PASS               | inter       | NA                                             | Event(CR2) |
| chr17                   | 3                         | FAIL                   | NA          | NA        | NA                 | NA          | NA                                             | NA         |
| chr18                   | 0                         | FAIL                   | NA          | NA        | NA                 | NA          | NA                                             | NA         |
| chr19:12012001-21352145 | 2                         | FAIL                   | FAIL        | FAIL      | FAIL               | NA          | NA                                             | NA         |
| chr20                   | 1                         | FAIL                   | NA          | NA        | NA                 | NA          | NA                                             | NA         |
| chr21                   | 0                         | FAIL                   | NA          | NA        | NA                 | NA          | NA                                             | NA         |
| chr22                   | 0                         | FAIL                   | NA          | NA        | NA                 | NA          | NA                                             | NA         |
| chrX:29381465-29393480  | 1                         | FAIL                   | FAIL        | FAIL      | FAIL               | NA          | NA                                             | NA         |
| chrY                    | 0                         | FAIL                   | NA          | NA        | NA                 | NA          | NA                                             | NA         |

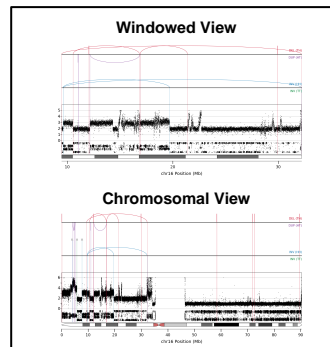

### ASHPC\_0001\_Pa\_P\_2

|                         | Total Pass: Chromosome(%) | Window ID with >= 8 SV | Window Join | Window AR | Window Oscillation | Window Type | Window Chain | Overall |
|-------------------------|---------------------------|------------------------|-------------|-----------|--------------------|-------------|--------------|---------|
| chr1                    | 0                         | FAIL                   | NA          | NA        | NA                 | NA          | NA           | NA      |
| chr2                    | 0                         | FAIL                   | NA          | NA        | NA                 | NA          | NA           | NA      |
| chr3                    | 0                         | FAIL                   | NA          | NA        | NA                 | NA          | NA           | NA      |
| chr4                    | 0                         | FAIL                   | NA          | NA        | NA                 | NA          | NA           | NA      |
| chr5                    | 0                         | FAIL                   | NA          | NA        | NA                 | NA          | NA           | NA      |
| chr6                    | 0                         | FAIL                   | NA          | NA        | NA                 | NA          | NA           | NA      |
| chr7                    | 0                         | FAIL                   | NA          | NA        | NA                 | NA          | NA           | NA      |
| chr8                    | 0                         | FAIL                   | NA          | NA        | NA                 | NA          | NA           | NA      |
| chr9                    | 0                         | FAIL                   | NA          | NA        | NA                 | NA          | NA           | NA      |
| chr10                   | 0                         | FAIL                   | NA          | NA        | NA                 | NA          | NA           | NA      |
| chr11                   | 0                         | FAIL                   | NA          | NA        | NA                 | NA          | NA           | NA      |
| chr12                   | 0                         | FAIL                   | NA          | NA        | NA                 | NA          | NA           | NA      |
| chr13                   | 0                         | FAIL                   | NA          | NA        | NA                 | NA          | NA           | NA      |
| chr14:62224704-10790416 | 0                         | FAIL                   | FAIL        | FAIL      | FAIL               | NA          | NA           | NA      |
| chr15                   | 0                         | FAIL                   | NA          | NA        | NA                 | NA          | NA           | NA      |
| chr16                   | 0                         | FAIL                   | NA          | NA        | NA                 | NA          | NA           | NA      |
| chr17                   | 0                         | FAIL                   | NA          | NA        | NA                 | NA          | NA           | NA      |
| chr18:1402001-25780642  | 3                         | FAIL                   | FAIL        | PASS      | FAIL               | NA          | NA           | NA      |
| chr18:26249932-47705000 | 3                         | FAIL                   | FAIL        | FAIL      | FAIL               | NA          | NA           | NA      |
| chr19                   | 1                         | FAIL                   | NA          | NA        | NA                 | NA          | NA           | NA      |
| chr20                   | 0                         | FAIL                   | NA          | NA        | NA                 | NA          | NA           | NA      |
| chr21                   | 0                         | FAIL                   | NA          | NA        | NA                 | NA          | NA           | NA      |
| chr22                   | 0                         | FAIL                   | NA          | NA        | NA                 | NA          | NA           | NA      |
| chrX                    | 0                         | FAIL                   | NA          | NA        | NA                 | NA          | NA           | NA      |
| chrY                    | 0                         | FAIL                   | NA          | NA        | NA                 | NA          | NA           | NA      |

### ASHPC\_0011\_Pa\_P

|                        | Total Pass: Chromosome(%) | Window ID with >= 8 SV | Window Join | Window AR | Window Oscillation | Window Type | Window Chain                                   | Overall |
|------------------------|---------------------------|------------------------|-------------|-----------|--------------------|-------------|------------------------------------------------|---------|
| chr1:31302012-50493696 | 0                         | FAIL                   | FAIL        | FAIL      | FAIL               | NA          | NA                                             | NA      |
| chr2                   | 0                         | FAIL                   | NA          | NA        | NA                 | NA          | NA                                             | NA      |
| chr3:43186935-65136472 | 6                         | FAIL                   | FAIL        | PASS      | PASS               | inter       | NA                                             | NA      |
| chr4                   | 0                         | FAIL                   | NA          | NA        | NA                 | NA          | NA                                             | NA      |
| chr5                   | 0                         | FAIL                   | NA          | NA        | NA                 | NA          | NA                                             | NA      |
| chr6                   | 0                         | FAIL                   | NA          | NA        | NA                 | NA          | NA                                             | NA      |
| chr7                   | 0                         | FAIL                   | NA          | NA        | NA                 | NA          | NA                                             | NA      |
| chr8:41517313-41530153 | 0                         | FAIL                   | FAIL        | FAIL      | FAIL               | chain       | chr18:20973927-2098324, chr8:41517313-41530153 | NA      |
| chr9                   | 2                         | FAIL                   | NA          | NA        | NA                 | NA          | NA                                             | NA      |
| chr10                  | 0                         | FAIL                   | NA          | NA        | NA                 | NA          | NA                                             | NA      |
| chr11                  | 0                         | FAIL                   | NA          | NA        | NA                 | NA          | NA                                             | NA      |
| chr12                  | 0                         | FAIL                   | NA          | NA        | NA                 | NA          | NA                                             | NA      |
| chr13                  | 0                         | FAIL                   | NA          | NA        | NA                 | NA          | NA                                             | NA      |
| chr14                  | 0                         | FAIL                   | NA          | NA        | NA                 | NA          | NA                                             | NA      |
| chr15                  | 0                         | FAIL                   | NA          | NA        | NA                 | NA          | NA                                             | NA      |
| chr16                  | 0                         | FAIL                   | NA          | NA        | NA                 | NA          | NA                                             | NA      |
| chr17                  | 0                         | FAIL                   | NA          | NA        | NA                 | NA          | NA                                             | NA      |
| chr18:20973927-2098324 | 2                         | FAIL                   | FAIL        | FAIL      | FAIL               | chain       | chr18:20973927-2098324, chr8:41517313-41530153 | NA      |
| chr19                  | 1                         | FAIL                   | NA          | NA        | NA                 | NA          | NA                                             | NA      |
| chr20                  | 0                         | FAIL                   | NA          | NA        | NA                 | NA          | NA                                             | NA      |
| chr21                  | 3                         | FAIL                   | NA          | NA        | NA                 | NA          | NA                                             | NA      |
| chr22                  | 0                         | FAIL                   | NA          | NA        | NA                 | NA          | NA                                             | NA      |
| chrX:74922541-74962043 | 1                         | FAIL                   | FAIL        | FAIL      | FAIL               | NA          | NA                                             | NA      |
| chrY                   | 0                         | FAIL                   | NA          | NA        | NA                 | NA          | NA                                             | NA      |

### ASHPC\_0013\_Pa\_P

|                         | Total Pass: Chromosome(%) | Window ID with >= 8 SV | Window Join | Window AR | Window Oscillation | Window Type | Window Chain | Overall |
|-------------------------|---------------------------|------------------------|-------------|-----------|--------------------|-------------|--------------|---------|
| chr1                    | 0                         | FAIL                   | NA          | NA        | NA                 | NA          | NA           | NA      |
| chr2                    | 0                         | FAIL                   | NA          | NA        | NA                 | NA          | NA           | NA      |
| chr3                    | 0                         | FAIL                   | NA          | NA        | NA                 | NA          | NA           | NA      |
| chr4                    | 0                         | FAIL                   | NA          | NA        | NA                 | NA          | NA           | NA      |
| chr5                    | 0                         | FAIL                   | NA          | NA        | NA                 | NA          | NA           | NA      |
| chr6:48535589-125147591 | 3                         | FAIL                   | FAIL        | PASS      | FAIL               | NA          | NA           | NA      |
| chr7                    | 0                         | FAIL                   | NA          | NA        | NA                 | NA          | NA           | NA      |
| chr8                    | 1                         | FAIL                   | NA          | NA        | NA                 | NA          | NA           | NA      |
| chr9                    | 0                         | FAIL                   | NA          | NA        | NA                 | NA          | NA           | NA      |
| chr10                   | 1                         | FAIL                   | NA          | NA        | NA                 | NA          | NA           | NA      |
| chr11                   | 0                         | FAIL                   | NA          | NA        | NA                 | NA          | NA           | NA      |
| chr12                   | 0                         | FAIL                   | NA          | NA        | NA                 | NA          | NA           | NA      |
| chr13                   | 0                         | FAIL                   | NA          | NA        | NA                 | NA          | NA           | NA      |
| chr14                   | 0                         | FAIL                   | NA          | NA        | NA                 | NA          | NA           | NA      |
| chr15                   | 0                         | FAIL                   | NA          | NA        | NA                 | NA          | NA           | NA      |
| chr16                   | 0                         | FAIL                   | NA          | NA        | NA                 | NA          | NA           | NA      |
| chr17                   | 2                         | FAIL                   | NA          | NA        | NA                 | NA          | NA           | NA      |
| chr18                   | 0                         | FAIL                   | NA          | NA        | NA                 | NA          | NA           | NA      |
| chr19                   | 0                         | FAIL                   | NA          | NA        | NA                 | NA          | NA           | NA      |
| chr20                   | 0                         | FAIL                   | NA          | NA        | NA                 | NA          | NA           | NA      |
| chr21                   | 0                         | FAIL                   | NA          | NA        | NA                 | NA          | NA           | NA      |
| chr22                   | 0                         | FAIL                   | NA          | NA        | NA                 | NA          | NA           | NA      |
| chrX                    | 0                         | FAIL                   | NA          | NA        | NA                 | NA          | NA           | NA      |
| chrY                    | 0                         | FAIL                   | NA          | NA        | NA                 | NA          | NA           | NA      |

### ASHPC\_0015\_Pa\_P

|                        | Total Pass: Chromosome(%) | Window ID with >= 8 SV | Window Join | Window AR | Window Oscillation | Window Type | Window Chain | Overall |
|------------------------|---------------------------|------------------------|-------------|-----------|--------------------|-------------|--------------|---------|
| chr1                   | 0                         | FAIL                   | NA          | NA        | NA                 | NA          | NA           | NA      |
| chr2                   | 0                         | FAIL                   | NA          | NA        | NA                 | NA          | NA           | NA      |
| chr3                   | 0                         | FAIL                   | NA          | NA        | NA                 | NA          | NA           | NA      |
| chr4                   | 0                         | FAIL                   | NA          | NA        | NA                 | NA          | NA           | NA      |
| chr5                   | 0                         | FAIL                   | NA          | NA        | NA                 | NA          | NA           | NA      |
| chr6                   | 0                         | FAIL                   | NA          | NA        | NA                 | NA          | NA           | NA      |
| chr7                   | 0                         | FAIL                   | NA          | NA        | NA                 | NA          | NA           | NA      |
| chr8                   | 0                         | FAIL                   | NA          | NA        | NA                 | NA          | NA           | NA      |
| chr9:20406142-22225000 | 1                         | FAIL                   | FAIL        | FAIL      | FAIL               | NA          | NA           | NA      |
| chr10                  | 0                         | FAIL                   | NA          | NA        | NA                 | NA          | NA           | NA      |
| chr11                  | 0                         | FAIL                   | NA          | NA        | NA                 | NA          | NA           | NA      |
| chr12                  | 0                         | FAIL                   | NA          | NA        | NA                 | NA          | NA           | NA      |
| chr13                  | 0                         | FAIL                   | NA          | NA        | NA                 | NA          | NA           | NA      |
| chr14                  | 0                         | FAIL                   | NA          | NA        | NA                 | NA          | NA           | NA      |
| chr15                  | 0                         | FAIL                   | NA          | NA        | NA                 | NA          | NA           | NA      |
| chr16                  | 0                         | FAIL                   | NA          | NA        | NA                 | NA          | NA           | NA      |
| chr17                  | 0                         | FAIL                   | NA          | NA        | NA                 | NA          | NA           | NA      |
| chr18                  | 0                         | FAIL                   | NA          | NA        | NA                 | NA          | NA           | NA      |
| chr19:6421936-58980326 | 3                         | FAIL                   | PASS        | FAIL      | FAIL               | NA          | NA           | NA      |
| chr20                  | 0                         | FAIL                   | NA          | NA        | NA                 | NA          | NA           | NA      |
| chr21                  | 0                         | FAIL                   | NA          | NA        | NA                 | NA          | NA           | NA      |
| chr22                  | 0                         | FAIL                   | NA          | NA        | NA                 | NA          | NA           | NA      |
| chrX                   | 0                         | FAIL                   | NA          | NA        | NA                 | NA          | NA           | NA      |
| chrY                   | 0                         | FAIL                   | NA          | NA        | NA                 | NA          | NA           | NA      |

### ASHPC\_0019\_Pa\_P

|                          | Total Pass: Chromosome(%) | Window ID with >= 8 SV | Window Join | Window AR | Window Oscillation | Window Type | Window Chain | Overall |
|--------------------------|---------------------------|------------------------|-------------|-----------|--------------------|-------------|--------------|---------|
| chr1                     | 0                         | FAIL                   | NA          | NA        | NA                 | NA          | NA           | NA      |
| chr2                     | 0                         | FAIL                   | NA          | NA        | NA                 | NA          | NA           | NA      |
| chr3                     | 0                         | FAIL                   | NA          | NA        | NA                 | NA          | NA           | NA      |
| chr4                     | 0                         | FAIL                   | NA          | NA        | NA                 | NA          | NA           | NA      |
| chr5                     | 0                         | FAIL                   | NA          | NA        | NA                 | NA          | NA           | NA      |
| chr6:18731223-66148378   | 5                         | FAIL                   | FAIL        | PASS      | PASS               | inter       | NA           | NA      |
| chr7                     | 0                         | FAIL                   | NA          | NA        | NA                 | NA          | NA           | NA      |
| chr8                     | 0                         | FAIL                   | NA          | NA        | NA                 | NA          | NA           | NA      |
| chr9:19426001-29485589   | 5                         | FAIL                   | FAIL        | PASS      | PASS               | NA          | NA           | NA      |
| chr10                    | 0                         | FAIL                   | NA          | NA        | NA                 | NA          | NA           | NA      |
| chr11                    | 0                         | FAIL                   | NA          | NA        | NA                 | NA          | NA           | NA      |
| chr12                    | 0                         | FAIL                   | NA          | NA        | NA                 | NA          | NA           | NA      |
| chr13                    | 0                         | FAIL                   | NA          | NA        | NA                 | NA          | NA           | NA      |
| chr14                    | 0                         | FAIL                   | NA          | NA        | NA                 | NA          | NA           | NA      |
| chr15                    | 0                         | FAIL                   | NA          | NA        | NA                 | NA          | NA           | NA      |
| chr16                    | 0                         | FAIL                   | NA          | NA        | NA                 | NA          | NA           | NA      |
| chr17                    | 0                         | FAIL                   | NA          | NA        | NA                 | NA          | NA           | NA      |
| chr18                    | 1                         | FAIL                   | NA          | NA        | NA                 | NA          | NA           | NA      |
| chr19:39612200-39623632  | 3                         | FAIL                   | FAIL        | FAIL      | FAIL               | NA          | NA           | NA      |
| chr19:563937879-56494445 | 3                         | FAIL                   | FAIL        | FAIL      | FAIL               | NA          | NA           | NA      |
| chr20                    | 0                         | FAIL                   | NA          | NA        | NA                 | NA          | NA           | NA      |
| chr21                    | 0                         | FAIL                   | NA          | NA        | NA                 | NA          | NA           | NA      |
| chr22                    | 0                         | FAIL                   | NA          | NA        | NA                 | NA          | NA           | NA      |
| chrX                     | 0                         | FAIL                   | NA          | NA        | NA                 | NA          | NA           | NA      |
| chrY                     | 0                         | FAIL                   | NA          | NA        | NA                 | NA          | NA           | NA      |

### ASHPC\_0023\_Pa\_P

|                         | Total Pass: Chromosome(%) | Window ID with >= 8 SV | Window Join | Window AR | Window Oscillation | Window Type | Window Chain                                     | Overall |
|-------------------------|---------------------------|------------------------|-------------|-----------|--------------------|-------------|--------------------------------------------------|---------|
| chr1                    | 0                         | FAIL                   | NA          | NA        | NA                 | NA          | NA                                               | NA      |
| chr2                    | 0                         | FAIL                   | NA          | NA        | NA                 | NA          | NA                                               | NA      |
| chr3                    | 0                         | FAIL                   | NA          | NA        | NA                 | NA          | NA                                               | NA      |
| chr4                    | 0                         | FAIL                   | NA          | NA        | NA                 | NA          | NA                                               | NA      |
| chr5                    | 0                         | FAIL                   | NA          | NA        | NA                 | NA          | NA                                               | NA      |
| chr6                    | 0                         | FAIL                   | NA          | NA        | NA                 | NA          | NA                                               | NA      |
| chr7:42408186-65232070  | 0                         | FAIL                   | FAIL        | FAIL      | FAIL               | chain       | chr7:42408186-65232070, chr9:25243001-115566359  | NA      |
| chr8:47668760-136147805 | 4                         | FAIL                   | PASS        | FAIL      | FAIL               | chain       | chr22:29059555-29071915, chr8:47668760-136147805 | NA      |
| chr9:25243001-115566359 | 5                         | PASS                   | PASS        | FAIL      | FAIL               | chain       | chr7:42408186-65232070, chr9:25243001-115566359  | NA      |
| chr10                   | 0                         | FAIL                   | NA          | NA        | NA                 | NA          | NA                                               | NA      |
| chr11                   | 0                         | FAIL                   | NA          | NA        | NA                 | NA          | NA                                               | NA      |
| chr12                   | 0                         | FAIL                   | NA          | NA        | NA                 | NA          | NA                                               | NA      |
| chr13                   | 0                         | FAIL                   | NA          | NA        | NA                 | NA          | NA                                               | NA      |
| chr14                   | 0                         | FAIL                   | NA          | NA        | NA                 | NA          | NA                                               | NA      |
| chr15                   | 0                         | FAIL                   | NA          | NA        | NA                 | NA          | NA                                               | NA      |
| chr16                   | 0                         | FAIL                   | NA          | NA        | NA                 | NA          | NA                                               | NA      |
| chr17:40742965-70942000 | 3                         | FAIL                   | FAIL        | PASS      | FAIL               | inter       | NA                                               | NA      |
| chr18:99496-22579055    | 4                         | FAIL                   | PASS        | PASS      | FAIL               | NA          | NA                                               | NA      |
| chr19                   | 0                         | FAIL                   | NA          | NA        | NA                 | NA          | NA                                               | NA      |
| chr20                   | 0                         | FAIL                   | NA          | NA        | NA                 | NA          | NA                                               | NA      |
| chr21                   | 0                         | FAIL                   | NA          | NA        | NA                 | NA          | NA                                               | NA      |
| chr22:29059555-29071915 | 0                         | FAIL                   | FAIL        | FAIL      | FAIL               | chain       | chr22:29059555-29071915, chr8:47668760-136147805 | NA      |
| chrX                    | 0                         | FAIL                   | NA          | NA        | NA                 | NA          | NA                                               | NA      |
| chrY                    | 0                         | FAIL                   | NA          | NA        | NA                 | NA          | NA                                               | NA      |

### ASHPC\_0028\_Pa\_P

|                          | Total Pass: Chromosome(%) | Window ID with >= 8 SV | Window Join | Window AR | Window Oscillation | Window Type | Window Chain                                     | Overall |
|--------------------------|---------------------------|------------------------|-------------|-----------|--------------------|-------------|--------------------------------------------------|---------|
| chr1                     | 0                         | FAIL                   | NA          | NA        | NA                 | NA          | NA                                               | NA      |
| chr2                     | 0                         | FAIL                   | NA          | NA        | NA                 | NA          | NA                                               | NA      |
| chr3                     | 0                         | FAIL                   | NA          | NA        | NA                 | NA          | NA                                               | NA      |
| chr4                     | 0                         | FAIL                   | NA          | NA        | NA                 | NA          | NA                                               | NA      |
| chr5:109052663-117362607 | 4                         | FAIL                   | FAIL        | FAIL      | FAIL               | NA          | NA                                               | NA      |
| chr6                     | 0                         | FAIL                   | NA          | NA        | NA                 | NA          | NA                                               | NA      |
| chr7                     | 0                         | FAIL                   | NA          | NA        | NA                 | NA          | NA                                               | NA      |
| chr8                     | 0                         | FAIL                   | NA          | NA        | NA                 | NA          | NA                                               | NA      |
| chr9                     | 0                         | FAIL                   | NA          | NA        | NA                 | NA          | NA                                               | NA      |
| chr10:35299826-36172890  | 3                         | FAIL                   | PASS        | FAIL      | FAIL               | chain       | chr10:35299826-36172890, chr15:85931493-98439225 | NA      |
| chr11                    | 1                         | FAIL                   | NA          | NA        | NA                 | NA          | NA                                               | NA      |
| chr12                    | 0                         | FAIL                   | NA          | NA        | NA                 | NA          | NA                                               | NA      |
| chr13                    | 0                         | FAIL                   | NA          | NA        | NA                 | NA          | NA                                               | NA      |
| chr14                    | 0                         | FAIL                   | NA          | NA        | NA                 | NA          | NA                                               | NA      |
| chr15:85931493-98439225  | 3                         | FAIL                   | PASS        | FAIL      | FAIL               | chain       | chr10:35299826-36172890, chr15:85931493-98439225 | NA      |
| chr16                    | 0                         | FAIL                   | NA          | NA        | NA                 | NA          | NA                                               | NA      |
| chr17                    | 0                         | FAIL                   | NA          | NA        | NA                 | NA          | NA                                               | NA      |
| chr18:39178001-46581914  | 4                         | FAIL                   | PASS        | FAIL      | PASS               | NA          | NA                                               | NA      |
| chr19                    | 0                         | FAIL                   | NA          | NA        | NA                 | NA          | NA                                               | NA      |
| chr20                    | 0                         | FAIL                   | NA          | NA        | NA                 | NA          | NA                                               | NA      |
| chr21                    | 0                         | FAIL                   | NA          | NA        | NA                 | NA          | NA                                               | NA      |
| chr22                    | 0                         | FAIL                   | NA          | NA        | NA                 | NA          | NA                                               | NA      |
| chrX                     | 0                         | FAIL                   | NA          | NA        | NA                 | NA          | NA                                               | NA      |
| chrY                     | 0                         | FAIL                   | NA          | NA        | NA                 | NA          | NA                                               | NA      |

### ASHPC\_0029\_Pa\_P

|                        | Total Pass: Chromosome(%) | Window ID with >= 8 SV | Window Join | Window AR | Window Oscillation | Window Type | Window Chain | Overall |
|------------------------|---------------------------|------------------------|-------------|-----------|--------------------|-------------|--------------|---------|
| chr1                   | 5                         | FAIL                   | NA          | NA        | NA                 | NA          | NA           | NA      |
| chr2                   | 0                         | FAIL                   | NA          | NA        | NA                 | NA          | NA           | NA      |
| chr3                   | 0                         | FAIL                   | NA          | NA        | NA                 | NA          | NA           | NA      |
| chr4                   | 0                         | FAIL                   | NA          | NA        | NA                 | NA          | NA           | NA      |
| chr5                   | 0                         | FAIL                   | NA          | NA        | NA                 | NA          | NA           | NA      |
| chr6                   | 0                         | FAIL                   | NA          | NA        | NA                 | NA          | NA           | NA      |
| chr7                   | 0                         | FAIL                   | NA          | NA        | NA                 | NA          | NA           | NA      |
| chr8                   | 0                         | FAIL                   | NA          | NA        | NA                 | NA          | NA           | NA      |
| chr9:19461547-22103260 | 1                         | FAIL                   | FAIL        | FAIL      | FAIL               | NA          | NA           | NA      |
| chr10                  | 0                         | FAIL                   | NA          | NA        | NA                 | NA          | NA           | NA      |
| chr11                  | 0                         | FAIL                   | NA          | NA        | NA                 | NA          | NA           | NA      |
| chr12                  | 0                         | FAIL                   | NA          | NA        | NA                 | NA          | NA           | NA      |
| chr13                  | 0                         | FAIL                   | NA          | NA        | NA                 | NA          | NA           | NA      |
| chr14                  | 0                         | FAIL                   | NA          | NA        | NA                 | NA          | NA           | NA      |
| chr15                  | 0                         | FAIL                   | NA          | NA        | NA                 | NA          | NA           | NA      |
| chr16                  | 0                         | FAIL                   | NA          | NA        | NA                 | NA          | NA           | NA      |
| chr17                  | 0                         | FAIL                   | NA          | NA        | NA                 | NA          | NA           | NA      |
| chr18                  | 2                         | FAIL                   | NA          | NA        | NA                 | NA          | NA           | NA      |
| chr19                  | 0                         | FAIL                   | NA          | NA        | NA                 | NA          | NA           | NA      |
| chr20                  | 0                         | FAIL                   | NA          | NA        | NA                 | NA          | NA           | NA      |
| chr21                  | 0                         | FAIL                   | NA          | NA        | NA                 | NA          | NA           | NA      |
| chr22                  | 0                         | FAIL                   | NA          | NA        | NA                 | NA          | NA           | NA      |
| chrX                   | 0                         | FAIL                   | NA          | NA        | NA                 | NA          | NA           | NA      |
| chrY                   | 0                         | FAIL                   | NA          | NA        | NA                 | NA          | NA           | NA      |



PCSI\_0019\_Pa\_P\_526

|                        | Total Pass: Chromosome(s) | Window ID with >= 8 SV | Window Join | Window AR | Window Oscillation | Window Type | Window Chain | Overall |
|------------------------|---------------------------|------------------------|-------------|-----------|--------------------|-------------|--------------|---------|
| chr1                   | 0                         | FAIL                   | NA          | NA        | NA                 | NA          | NA           | NA      |
| chr2                   | 0                         | FAIL                   | NA          | NA        | NA                 | NA          | NA           | NA      |
| chr3                   | 0                         | FAIL                   | NA          | NA        | NA                 | NA          | NA           | NA      |
| chr4                   | 0                         | FAIL                   | NA          | NA        | NA                 | NA          | NA           | NA      |
| chr5                   | 0                         | FAIL                   | NA          | NA        | NA                 | NA          | NA           | NA      |
| chr6                   | 0                         | FAIL                   | NA          | NA        | NA                 | NA          | NA           | NA      |
| chr7                   | 0                         | FAIL                   | NA          | NA        | NA                 | NA          | NA           | NA      |
| chr8                   | 0                         | FAIL                   | NA          | NA        | NA                 | NA          | NA           | NA      |
| chr9                   | 1                         | FAIL                   | NA          | NA        | NA                 | NA          | NA           | NA      |
| chr10                  | 0                         | FAIL                   | NA          | NA        | NA                 | NA          | NA           | NA      |
| chr11                  | 0                         | FAIL                   | NA          | NA        | NA                 | NA          | NA           | NA      |
| chr12                  | 0                         | FAIL                   | NA          | NA        | NA                 | NA          | NA           | NA      |
| chr13                  | 0                         | FAIL                   | NA          | NA        | NA                 | NA          | NA           | NA      |
| chr14                  | 0                         | FAIL                   | NA          | NA        | NA                 | NA          | NA           | NA      |
| chr15                  | 0                         | FAIL                   | NA          | NA        | NA                 | NA          | NA           | NA      |
| chr16                  | 0                         | FAIL                   | NA          | NA        | NA                 | NA          | NA           | NA      |
| chr17                  | 1                         | FAIL                   | NA          | NA        | NA                 | NA          | NA           | NA      |
| chr18:9203001-12579000 | 3                         | FAIL                   | FAIL        | FAIL      | FAIL               | NA          | NA           | NA      |
| chr19                  | 0                         | FAIL                   | NA          | NA        | NA                 | NA          | NA           | NA      |
| chr20                  | 0                         | FAIL                   | NA          | NA        | NA                 | NA          | NA           | NA      |
| chr21                  | 0                         | FAIL                   | NA          | NA        | NA                 | NA          | NA           | NA      |
| chr22                  | 0                         | FAIL                   | NA          | NA        | NA                 | NA          | NA           | NA      |
| chrX                   | 0                         | FAIL                   | NA          | NA        | NA                 | NA          | NA           | NA      |
| chrY                   | 0                         | FAIL                   | NA          | NA        | NA                 | NA          | NA           | NA      |

PCSI\_0046\_Pa\_P\_526

|                          | Total Pass: Chromosome(s) | Window ID with >= 8 SV | Window Join | Window AR | Window Oscillation | Window Type | Window Chain | Overall |
|--------------------------|---------------------------|------------------------|-------------|-----------|--------------------|-------------|--------------|---------|
| chr1                     | 0                         | FAIL                   | NA          | NA        | NA                 | NA          | NA           | NA      |
| chr2                     | 1                         | FAIL                   | NA          | NA        | NA                 | NA          | NA           | NA      |
| chr3:166316471-181956222 | 3                         | FAIL                   | FAIL        | FAIL      | FAIL               | inter       | NA           | NA      |
| chr4                     | 0                         | FAIL                   | NA          | NA        | NA                 | NA          | NA           | NA      |
| chr5                     | 1                         | FAIL                   | NA          | NA        | NA                 | NA          | NA           | NA      |
| chr6                     | 0                         | FAIL                   | NA          | NA        | NA                 | NA          | NA           | NA      |
| chr7:25190319-34959000   | 4                         | FAIL                   | FAIL        | PASS      | FAIL               | NA          | NA           | NA      |
| chr8                     | 2                         | FAIL                   | NA          | NA        | NA                 | NA          | NA           | NA      |
| chr9                     | 0                         | FAIL                   | NA          | NA        | NA                 | NA          | NA           | NA      |
| chr10                    | 5                         | FAIL                   | NA          | NA        | NA                 | NA          | NA           | NA      |
| chr11                    | 0                         | FAIL                   | NA          | NA        | NA                 | NA          | NA           | NA      |
| chr12                    | 0                         | FAIL                   | NA          | NA        | NA                 | NA          | NA           | NA      |
| chr13                    | 0                         | FAIL                   | NA          | NA        | NA                 | NA          | NA           | NA      |
| chr14                    | 0                         | FAIL                   | NA          | NA        | NA                 | NA          | NA           | NA      |
| chr15                    | 0                         | FAIL                   | NA          | NA        | NA                 | NA          | NA           | NA      |
| chr16                    | 0                         | FAIL                   | NA          | NA        | NA                 | NA          | NA           | NA      |
| chr17                    | 0                         | FAIL                   | NA          | NA        | NA                 | NA          | NA           | NA      |
| chr18                    | 0                         | FAIL                   | NA          | NA        | NA                 | NA          | NA           | NA      |
| chr19                    | 0                         | FAIL                   | NA          | NA        | NA                 | NA          | NA           | NA      |
| chr20                    | 2                         | FAIL                   | NA          | NA        | NA                 | NA          | NA           | NA      |
| chr21                    | 0                         | FAIL                   | NA          | NA        | NA                 | NA          | NA           | NA      |
| chr22                    | 0                         | FAIL                   | NA          | NA        | NA                 | NA          | NA           | NA      |
| chrX                     | 1                         | FAIL                   | NA          | NA        | NA                 | NA          | NA           | NA      |
| chrY                     | 0                         | FAIL                   | NA          | NA        | NA                 | NA          | NA           | NA      |

PCSI\_0048\_Pa\_P\_526

|                          | Total Pass: Chromosome(s) | Window ID with >= 8 SV | Window Join | Window AR | Window Oscillation | Window Type | Window Chain | Overall |
|--------------------------|---------------------------|------------------------|-------------|-----------|--------------------|-------------|--------------|---------|
| chr1:149720950-229843311 | 1                         | FAIL                   | FAIL        | FAIL      | FAIL               | NA          | NA           | NA      |
| chr2                     | 3                         | FAIL                   | NA          | NA        | NA                 | NA          | NA           | NA      |
| chr3:3114998-8382277     | 5                         | FAIL                   | PASS        | PASS      | FAIL               | inter       | NA           | NA      |
| chr4                     | 1                         | FAIL                   | NA          | NA        | NA                 | NA          | NA           | NA      |
| chr5:14180062-171739097  | 3                         | FAIL                   | FAIL        | FAIL      | FAIL               | NA          | NA           | NA      |
| chr6                     | 1                         | FAIL                   | NA          | NA        | NA                 | NA          | NA           | NA      |
| chr7                     | 2                         | FAIL                   | NA          | NA        | NA                 | NA          | NA           | NA      |
| chr8                     | 1                         | FAIL                   | NA          | NA        | NA                 | NA          | NA           | NA      |
| chr9:34275068-91905224   | 1                         | FAIL                   | FAIL        | FAIL      | FAIL               | NA          | NA           | NA      |
| chr10                    | 0                         | FAIL                   | NA          | NA        | NA                 | NA          | NA           | NA      |
| chr11:85318593-134008564 | 2                         | FAIL                   | FAIL        | FAIL      | FAIL               | inter       | NA           | NA      |
| chr12:72177001-94422198  | 0                         | FAIL                   | FAIL        | FAIL      | FAIL               | NA          | NA           | NA      |
| chr13                    | 0                         | FAIL                   | NA          | NA        | NA                 | NA          | NA           | NA      |
| chr14                    | 0                         | FAIL                   | NA          | NA        | NA                 | NA          | NA           | NA      |
| chr15                    | 0                         | FAIL                   | NA          | NA        | NA                 | NA          | NA           | NA      |
| chr16                    | 0                         | FAIL                   | NA          | NA        | NA                 | NA          | NA           | NA      |
| chr17                    | 0                         | FAIL                   | NA          | NA        | NA                 | NA          | NA           | NA      |
| chr18                    | 0                         | FAIL                   | NA          | NA        | NA                 | NA          | NA           | NA      |
| chr19                    | 0                         | FAIL                   | NA          | NA        | NA                 | NA          | NA           | NA      |
| chr20                    | 0                         | FAIL                   | NA          | NA        | NA                 | NA          | NA           | NA      |
| chr21                    | 0                         | FAIL                   | NA          | NA        | NA                 | NA          | NA           | NA      |
| chr22                    | 0                         | FAIL                   | NA          | NA        | NA                 | NA          | NA           | NA      |
| chrX                     | 1                         | FAIL                   | NA          | NA        | NA                 | NA          | NA           | NA      |
| chrY                     | 0                         | FAIL                   | NA          | NA        | NA                 | NA          | NA           | NA      |

PCSI\_0073\_Pa\_P\_526

|                                                 | Total Pass: Chromosome(s) | Window ID with >= 8 SV | Window Join | Window AR | Window Oscillation | Window Type | Window Chain                                    | Overall |
|-------------------------------------------------|---------------------------|------------------------|-------------|-----------|--------------------|-------------|-------------------------------------------------|---------|
| chr1:77716560-77728589                          | 1                         | FAIL                   | FAIL        | FAIL      | FAIL               | chain       | chr18:35303112-35855245, chr1:77716560-77728589 | NA      |
| chr2                                            | 0                         | FAIL                   | NA          | NA        | NA                 | NA          | NA                                              | NA      |
| chr3                                            | 0                         | FAIL                   | NA          | NA        | NA                 | NA          | NA                                              | NA      |
| chr4                                            | 0                         | FAIL                   | NA          | NA        | NA                 | NA          | NA                                              | NA      |
| chr5                                            | 0                         | FAIL                   | NA          | NA        | NA                 | NA          | NA                                              | NA      |
| chr6                                            | 0                         | FAIL                   | NA          | NA        | NA                 | NA          | NA                                              | NA      |
| chr7                                            | 0                         | FAIL                   | NA          | NA        | NA                 | NA          | NA                                              | NA      |
| chr8                                            | 0                         | FAIL                   | NA          | NA        | NA                 | NA          | NA                                              | NA      |
| chr9                                            | 0                         | FAIL                   | NA          | NA        | NA                 | NA          | NA                                              | NA      |
| chr10                                           | 0                         | FAIL                   | NA          | NA        | NA                 | NA          | NA                                              | NA      |
| chr11:24813830-24627809                         | 2                         | FAIL                   | FAIL        | FAIL      | FAIL               | NA          | NA                                              | NA      |
| chr12                                           | 0                         | FAIL                   | NA          | NA        | NA                 | NA          | NA                                              | NA      |
| chr13                                           | 0                         | FAIL                   | NA          | NA        | NA                 | NA          | NA                                              | NA      |
| chr14                                           | 0                         | FAIL                   | NA          | NA        | NA                 | NA          | NA                                              | NA      |
| chr15                                           | 0                         | FAIL                   | NA          | NA        | NA                 | NA          | NA                                              | NA      |
| chr16                                           | 0                         | FAIL                   | NA          | NA        | NA                 | NA          | NA                                              | NA      |
| chr17                                           | 0                         | FAIL                   | NA          | NA        | NA                 | NA          | NA                                              | NA      |
| chr18:35303112-35855245, chr1:77716560-77728589 | 3                         | FAIL                   | PASS        | FAIL      | FAIL               | chain       | chr18:35303112-35855245, chr1:77716560-77728589 | NA      |
| chr19                                           | 2                         | FAIL                   | NA          | NA        | NA                 | NA          | NA                                              | NA      |
| chr20:9021884-20915000                          | 6                         | FAIL                   | FAIL        | PASS      | PASS               | NA          | NA                                              | NA      |
| chr21                                           | 0                         | FAIL                   | NA          | NA        | NA                 | NA          | NA                                              | NA      |
| chr22                                           | 0                         | FAIL                   | NA          | NA        | NA                 | NA          | NA                                              | NA      |
| chrX                                            | 0                         | FAIL                   | NA          | NA        | NA                 | NA          | NA                                              | NA      |
| chrY                                            | 0                         | FAIL                   | NA          | NA        | NA                 | NA          | NA                                              | NA      |

PCSI\_0078\_Pa\_P\_526

|                         | Total Pass: Chromosome(%) | Window ID with >= 8 SV | Window Join | Window AR | Window Oscillation | Window Type | Window Chain | Overall |
|-------------------------|---------------------------|------------------------|-------------|-----------|--------------------|-------------|--------------|---------|
| chr1                    | 0                         | FAIL                   | NA          | NA        | NA                 | NA          | NA           | NA      |
| chr2                    | 0                         | FAIL                   | NA          | NA        | NA                 | NA          | NA           | NA      |
| chr3                    | 0                         | FAIL                   | NA          | NA        | NA                 | NA          | NA           | NA      |
| chr4                    | 0                         | FAIL                   | NA          | NA        | NA                 | NA          | NA           | NA      |
| chr5                    | 0                         | FAIL                   | NA          | NA        | NA                 | NA          | NA           | NA      |
| chr6                    | 0                         | FAIL                   | NA          | NA        | NA                 | NA          | NA           | NA      |
| chr7                    | 2                         | FAIL                   | NA          | NA        | NA                 | NA          | NA           | NA      |
| chr8                    | 1                         | FAIL                   | NA          | NA        | NA                 | NA          | NA           | NA      |
| chr9                    | 4                         | FAIL                   | NA          | NA        | NA                 | NA          | NA           | NA      |
| chr10                   | 0                         | FAIL                   | NA          | NA        | NA                 | NA          | NA           | NA      |
| chr11                   | 0                         | FAIL                   | NA          | NA        | NA                 | NA          | NA           | NA      |
| chr12:23101173-23265140 | 3                         | FAIL                   | FAIL        | FAIL      | FAIL               | NA          | NA           | NA      |
| chr13                   | 0                         | FAIL                   | NA          | NA        | NA                 | NA          | NA           | NA      |
| chr14                   | 3                         | FAIL                   | NA          | NA        | NA                 | NA          | NA           | NA      |
| chr15                   | 0                         | FAIL                   | NA          | NA        | NA                 | NA          | NA           | NA      |
| chr16                   | 0                         | FAIL                   | NA          | NA        | NA                 | NA          | NA           | NA      |
| chr17                   | 1                         | FAIL                   | NA          | NA        | NA                 | NA          | NA           | NA      |
| chr18:78933401-77328000 | 5                         | FAIL                   | FAIL        | FAIL      | FAIL               | NA          | NA           | NA      |
| chr19:29861299-31233513 | 4                         | FAIL                   | PASS        | FAIL      | FAIL               | inter       | NA           | NA      |
| chr19:38628955-38787797 | 4                         | FAIL                   | FAIL        | FAIL      | FAIL               | NA          | NA           | NA      |
| chr20                   | 0                         | FAIL                   | NA          | NA        | NA                 | NA          | NA           | NA      |
| chr21                   | 2                         | FAIL                   | NA          | NA        | NA                 | NA          | NA           | NA      |
| chr22                   | 1                         | FAIL                   | NA          | NA        | NA                 | NA          | NA           | NA      |
| chrX                    | 0                         | FAIL                   | NA          | NA        | NA                 | NA          | NA           | NA      |
| chrY                    | 0                         | FAIL                   | NA          | NA        | NA                 | NA          | NA           | NA      |

PCSI\_0084\_Pa\_P\_526

|                          | Total Pass: Chromosome(%) | Window ID with >= 8 SV | Window Join | Window AR | Window Oscillation | Window Type | Window Chain                                      | Overall |
|--------------------------|---------------------------|------------------------|-------------|-----------|--------------------|-------------|---------------------------------------------------|---------|
| chr1                     | 1                         | FAIL                   | NA          | NA        | NA                 | NA          | NA                                                | NA      |
| chr2                     | 0                         | FAIL                   | NA          | NA        | NA                 | NA          | NA                                                | NA      |
| chr3                     | 0                         | FAIL                   | NA          | NA        | NA                 | NA          | NA                                                | NA      |
| chr4                     | 0                         | FAIL                   | NA          | NA        | NA                 | NA          | NA                                                | NA      |
| chr5                     | 0                         | FAIL                   | NA          | NA        | NA                 | NA          | NA                                                | NA      |
| chr6                     | 0                         | FAIL                   | NA          | NA        | NA                 | NA          | NA                                                | NA      |
| chr7                     | 0                         | FAIL                   | NA          | NA        | NA                 | NA          | NA                                                | NA      |
| chr8:106844374-106856374 | 0                         | FAIL                   | FAIL        | FAIL      | FAIL               | chain       | chr20:40900299-57468011, chr8:106844374-106856374 | NA      |
| chr9                     | 0                         | FAIL                   | NA          | NA        | NA                 | NA          | NA                                                | NA      |
| chr10                    | 0                         | FAIL                   | NA          | NA        | NA                 | NA          | NA                                                | NA      |
| chr11                    | 0                         | FAIL                   | NA          | NA        | NA                 | NA          | NA                                                | NA      |
| chr12                    | 0                         | FAIL                   | NA          | NA        | NA                 | NA          | NA                                                | NA      |
| chr13                    | 0                         | FAIL                   | NA          | NA        | NA                 | NA          | NA                                                | NA      |
| chr14                    | 0                         | FAIL                   | NA          | NA        | NA                 | NA          | NA                                                | NA      |
| chr15                    | 0                         | FAIL                   | NA          | NA        | NA                 | NA          | NA                                                | NA      |
| chr16                    | 1                         | FAIL                   | NA          | NA        | NA                 | NA          | NA                                                | NA      |
| chr17                    | 0                         | FAIL                   | NA          | NA        | NA                 | NA          | NA                                                | NA      |
| chr18                    | 0                         | FAIL                   | NA          | NA        | NA                 | NA          | NA                                                | NA      |
| chr19                    | 0                         | FAIL                   | NA          | NA        | NA                 | NA          | NA                                                | NA      |
| chr20:40900299-57468011  | 3                         | FAIL                   | PASS        | FAIL      | FAIL               | chain       | chr20:40900299-57468011, chr8:106844374-106856374 | NA      |
| chr21                    | 0                         | FAIL                   | NA          | NA        | NA                 | NA          | NA                                                | NA      |
| chr22                    | 0                         | FAIL                   | NA          | NA        | NA                 | NA          | NA                                                | NA      |
| chrX                     | 0                         | FAIL                   | NA          | NA        | NA                 | NA          | NA                                                | NA      |
| chrY                     | 0                         | FAIL                   | NA          | NA        | NA                 | NA          | NA                                                | NA      |

PCSI\_0096\_Pa\_P\_526

|                           | Total Pass: Chromosome(%) | Window ID with >= 8 SV | Window Join | Window AR | Window Oscillation | Window Type | Window Chain | Overall |
|---------------------------|---------------------------|------------------------|-------------|-----------|--------------------|-------------|--------------|---------|
| chr1                      | 0                         | FAIL                   | NA          | NA        | NA                 | NA          | NA           | NA      |
| chr2                      | 0                         | FAIL                   | NA          | NA        | NA                 | NA          | NA           | NA      |
| chr3                      | 0                         | FAIL                   | NA          | NA        | NA                 | NA          | NA           | NA      |
| chr4                      | 0                         | FAIL                   | NA          | NA        | NA                 | NA          | NA           | NA      |
| chr5                      | 0                         | FAIL                   | NA          | NA        | NA                 | NA          | NA           | NA      |
| chr6                      | 0                         | FAIL                   | NA          | NA        | NA                 | NA          | NA           | NA      |
| chr7                      | 0                         | FAIL                   | NA          | NA        | NA                 | NA          | NA           | NA      |
| chr8                      | 0                         | FAIL                   | NA          | NA        | NA                 | NA          | NA           | NA      |
| chr9                      | 0                         | FAIL                   | NA          | NA        | NA                 | NA          | NA           | NA      |
| chr10                     | 2                         | FAIL                   | NA          | NA        | NA                 | NA          | NA           | NA      |
| chr11                     | 0                         | FAIL                   | NA          | NA        | NA                 | NA          | NA           | NA      |
| chr12:114529663-128417358 | 0                         | FAIL                   | FAIL        | FAIL      | FAIL               | NA          | NA           | NA      |
| chr13                     | 0                         | FAIL                   | NA          | NA        | NA                 | NA          | NA           | NA      |
| chr14                     | 0                         | FAIL                   | NA          | NA        | NA                 | NA          | NA           | NA      |
| chr15                     | 0                         | FAIL                   | NA          | NA        | NA                 | NA          | NA           | NA      |
| chr16                     | 0                         | FAIL                   | NA          | NA        | NA                 | NA          | NA           | NA      |
| chr17                     | 0                         | FAIL                   | NA          | NA        | NA                 | NA          | NA           | NA      |
| chr18                     | 0                         | FAIL                   | NA          | NA        | NA                 | NA          | NA           | NA      |
| chr19                     | 0                         | FAIL                   | NA          | NA        | NA                 | NA          | NA           | NA      |
| chr20                     | 0                         | FAIL                   | NA          | NA        | NA                 | NA          | NA           | NA      |
| chr21                     | 0                         | FAIL                   | NA          | NA        | NA                 | NA          | NA           | NA      |
| chr22                     | 0                         | FAIL                   | NA          | NA        | NA                 | NA          | NA           | NA      |
| chrX                      | 0                         | FAIL                   | NA          | NA        | NA                 | NA          | NA           | NA      |
| chrY                      | 0                         | FAIL                   | NA          | NA        | NA                 | NA          | NA           | NA      |

PCSI\_0099\_Pa\_P\_526

|                        | Total Pass: Chromosome(%) | Window ID with >= 8 SV | Window Join | Window AR | Window Oscillation | Window Type | Window Chain | Overall |
|------------------------|---------------------------|------------------------|-------------|-----------|--------------------|-------------|--------------|---------|
| chr1                   | 1                         | FAIL                   | NA          | NA        | NA                 | NA          | NA           | NA      |
| chr2                   | 0                         | FAIL                   | NA          | NA        | NA                 | NA          | NA           | NA      |
| chr3                   | 1                         | FAIL                   | NA          | NA        | NA                 | NA          | NA           | NA      |
| chr4                   | 0                         | FAIL                   | NA          | NA        | NA                 | NA          | NA           | NA      |
| chr5:54615001-62660000 | 3                         | FAIL                   | FAIL        | FAIL      | PASS               | NA          | NA           | NA      |
| chr6:47873256-48138309 | 3                         | FAIL                   | PASS        | FAIL      | FAIL               | NA          | NA           | NA      |
| chr7                   | 4                         | FAIL                   | NA          | NA        | NA                 | NA          | NA           | NA      |
| chr8                   | 1                         | FAIL                   | NA          | NA        | NA                 | NA          | NA           | NA      |
| chr9:33061830-36356025 | 1                         | FAIL                   | FAIL        | FAIL      | FAIL               | NA          | NA           | NA      |
| chr10                  | 0                         | FAIL                   | NA          | NA        | NA                 | NA          | NA           | NA      |
| chr11                  | 0                         | FAIL                   | NA          | NA        | NA                 | NA          | NA           | NA      |
| chr12                  | 0                         | FAIL                   | NA          | NA        | NA                 | NA          | NA           | NA      |
| chr13                  | 0                         | FAIL                   | NA          | NA        | NA                 | NA          | NA           | NA      |
| chr14                  | 0                         | FAIL                   | NA          | NA        | NA                 | NA          | NA           | NA      |
| chr15                  | 0                         | FAIL                   | NA          | NA        | NA                 | NA          | NA           | NA      |
| chr16                  | 0                         | FAIL                   | NA          | NA        | NA                 | NA          | NA           | NA      |
| chr17                  | 0                         | FAIL                   | NA          | NA        | NA                 | NA          | NA           | NA      |
| chr18                  | 0                         | FAIL                   | NA          | NA        | NA                 | NA          | NA           | NA      |
| chr19                  | 0                         | FAIL                   | NA          | NA        | NA                 | NA          | NA           | NA      |
| chr20                  | 0                         | FAIL                   | NA          | NA        | NA                 | NA          | NA           | NA      |
| chr21                  | 0                         | FAIL                   | NA          | NA        | NA                 | NA          | NA           | NA      |
| chr22                  | 3                         | FAIL                   | NA          | NA        | NA                 | NA          | NA           | NA      |
| chrX                   | 0                         | FAIL                   | NA          | NA        | NA                 | NA          | NA           | NA      |
| chrY                   | 0                         | FAIL                   | NA          | NA        | NA                 | NA          | NA           | NA      |

PCSI\_0102\_Pa\_P\_526

|                          | Total Pass: Chromosome(s) | Window ID with >= 8 SV | Window Join | Window AR | Window Oscillation | Window Type | Window Chain                                     | Overall |
|--------------------------|---------------------------|------------------------|-------------|-----------|--------------------|-------------|--------------------------------------------------|---------|
| chr1                     | 0                         | FAIL                   | NA          | NA        | NA                 | NA          | NA                                               | NA      |
| chr2                     | 0                         | FAIL                   | NA          | NA        | NA                 | NA          | NA                                               | NA      |
| chr3:3917323-86416000    | 1                         | FAIL                   | FAIL        | FAIL      | FAIL               | NA          | NA                                               | NA      |
| chr4                     | 0                         | FAIL                   | NA          | NA        | NA                 | NA          | NA                                               | NA      |
| chr5                     | 0                         | FAIL                   | NA          | NA        | NA                 | NA          | NA                                               | NA      |
| chr6                     | 0                         | FAIL                   | NA          | NA        | NA                 | NA          | NA                                               | NA      |
| chr7                     | 0                         | FAIL                   | NA          | NA        | NA                 | NA          | NA                                               | NA      |
| chr8                     | 0                         | FAIL                   | NA          | NA        | NA                 | NA          | NA                                               | NA      |
| chr9                     | 0                         | FAIL                   | NA          | NA        | NA                 | NA          | NA                                               | NA      |
| chr10                    | 0                         | FAIL                   | NA          | NA        | NA                 | NA          | NA                                               | NA      |
| chr11                    | 0                         | FAIL                   | NA          | NA        | NA                 | NA          | NA                                               | NA      |
| chr12                    | 0                         | FAIL                   | NA          | NA        | NA                 | NA          | NA                                               | NA      |
| chr13                    | 0                         | FAIL                   | NA          | NA        | NA                 | NA          | NA                                               | NA      |
| chr14                    | 0                         | FAIL                   | NA          | NA        | NA                 | NA          | NA                                               | NA      |
| chr15                    | 0                         | FAIL                   | NA          | NA        | NA                 | NA          | NA                                               | NA      |
| chr16                    | 0                         | FAIL                   | NA          | NA        | NA                 | NA          | NA                                               | NA      |
| chr17:15334477-15743376  | 4                         | FAIL                   | FAIL        | FAIL      | FAIL               | chain       | chr17:15334477-15743376, chr18:22445001-23059000 | NA      |
| chr18:22445001-23059000  | 0                         | FAIL                   | FAIL        | FAIL      | FAIL               | chain       | chr17:15334477-15743376, chr18:22445001-23059000 | NA      |
| chr19                    | 0                         | FAIL                   | NA          | NA        | NA                 | NA          | NA                                               | NA      |
| chr20                    | 0                         | FAIL                   | NA          | NA        | NA                 | NA          | NA                                               | NA      |
| chr21                    | 0                         | FAIL                   | NA          | NA        | NA                 | NA          | NA                                               | NA      |
| chr22                    | 0                         | FAIL                   | NA          | NA        | NA                 | NA          | NA                                               | NA      |
| chrX:122876558-123041937 | 0                         | FAIL                   | FAIL        | FAIL      | FAIL               | NA          | NA                                               | NA      |
| chrY                     | 0                         | FAIL                   | NA          | NA        | NA                 | NA          | NA                                               | NA      |

PCSI\_0103\_Pa\_P\_526

|       | Total Pass: Chromosome(s) | Window ID with >= 8 SV | Window Join | Window AR | Window Oscillation | Window Type | Window Chain | Overall |
|-------|---------------------------|------------------------|-------------|-----------|--------------------|-------------|--------------|---------|
| chr1  | 0                         | FAIL                   | NA          | NA        | NA                 | NA          | NA           | NA      |
| chr2  | 0                         | FAIL                   | NA          | NA        | NA                 | NA          | NA           | NA      |
| chr3  | 0                         | FAIL                   | NA          | NA        | NA                 | NA          | NA           | NA      |
| chr4  | 0                         | FAIL                   | NA          | NA        | NA                 | NA          | NA           | NA      |
| chr5  | 0                         | FAIL                   | NA          | NA        | NA                 | NA          | NA           | NA      |
| chr6  | 0                         | FAIL                   | NA          | NA        | NA                 | NA          | NA           | NA      |
| chr7  | 0                         | FAIL                   | NA          | NA        | NA                 | NA          | NA           | NA      |
| chr8  | 0                         | FAIL                   | NA          | NA        | NA                 | NA          | NA           | NA      |
| chr9  | 0                         | FAIL                   | NA          | NA        | NA                 | NA          | NA           | NA      |
| chr10 | 0                         | FAIL                   | NA          | NA        | NA                 | NA          | NA           | NA      |
| chr11 | 0                         | FAIL                   | NA          | NA        | NA                 | NA          | NA           | NA      |
| chr12 | 0                         | FAIL                   | NA          | NA        | NA                 | NA          | NA           | NA      |
| chr13 | 0                         | FAIL                   | NA          | NA        | NA                 | NA          | NA           | NA      |
| chr14 | 0                         | FAIL                   | NA          | NA        | NA                 | NA          | NA           | NA      |
| chr15 | 0                         | FAIL                   | NA          | NA        | NA                 | NA          | NA           | NA      |
| chr16 | 0                         | FAIL                   | NA          | NA        | NA                 | NA          | NA           | NA      |
| chr17 | 0                         | FAIL                   | NA          | NA        | NA                 | NA          | NA           | NA      |
| chr18 | 0                         | FAIL                   | NA          | NA        | NA                 | NA          | NA           | NA      |
| chr19 | 0                         | FAIL                   | NA          | NA        | NA                 | NA          | NA           | NA      |
| chr20 | 0                         | FAIL                   | NA          | NA        | NA                 | NA          | NA           | NA      |
| chr21 | 0                         | FAIL                   | NA          | NA        | NA                 | NA          | NA           | NA      |
| chr22 | 0                         | FAIL                   | NA          | NA        | NA                 | NA          | NA           | NA      |
| chrX  | 0                         | FAIL                   | NA          | NA        | NA                 | NA          | NA           | NA      |
| chrY  | 0                         | FAIL                   | NA          | NA        | NA                 | NA          | NA           | NA      |

PCSI\_0108\_Pa\_P\_526

|                          | Total Pass: Chromosome(s) | Window ID with >= 8 SV | Window Join | Window AR | Window Oscillation | Window Type | Window Chain | Overall |
|--------------------------|---------------------------|------------------------|-------------|-----------|--------------------|-------------|--------------|---------|
| chr1                     | 0                         | FAIL                   | NA          | NA        | NA                 | NA          | NA           | NA      |
| chr2                     | 0                         | FAIL                   | NA          | NA        | NA                 | NA          | NA           | NA      |
| chr3                     | 0                         | FAIL                   | NA          | NA        | NA                 | NA          | NA           | NA      |
| chr4:1683659-1776353     | 0                         | FAIL                   | FAIL        | FAIL      | FAIL               | NA          | NA           | NA      |
| chr5                     | 0                         | FAIL                   | NA          | NA        | NA                 | NA          | NA           | NA      |
| chr6                     | 0                         | FAIL                   | NA          | NA        | NA                 | NA          | NA           | NA      |
| chr7                     | 0                         | FAIL                   | NA          | NA        | NA                 | NA          | NA           | NA      |
| chr8                     | 0                         | FAIL                   | NA          | NA        | NA                 | NA          | NA           | NA      |
| chr9                     | 0                         | FAIL                   | NA          | NA        | NA                 | NA          | NA           | NA      |
| chr10                    | 0                         | FAIL                   | NA          | NA        | NA                 | NA          | NA           | NA      |
| chr11                    | 0                         | FAIL                   | NA          | NA        | NA                 | NA          | NA           | NA      |
| chr12                    | 0                         | FAIL                   | NA          | NA        | NA                 | NA          | NA           | NA      |
| chr13                    | 0                         | FAIL                   | NA          | NA        | NA                 | NA          | NA           | NA      |
| chr14                    | 0                         | FAIL                   | NA          | NA        | NA                 | NA          | NA           | NA      |
| chr15                    | 0                         | FAIL                   | NA          | NA        | NA                 | NA          | NA           | NA      |
| chr16                    | 0                         | FAIL                   | NA          | NA        | NA                 | NA          | NA           | NA      |
| chr17                    | 0                         | FAIL                   | NA          | NA        | NA                 | NA          | NA           | NA      |
| chr18                    | 0                         | FAIL                   | NA          | NA        | NA                 | NA          | NA           | NA      |
| chr19                    | 0                         | FAIL                   | NA          | NA        | NA                 | NA          | NA           | NA      |
| chr20                    | 0                         | FAIL                   | NA          | NA        | NA                 | NA          | NA           | NA      |
| chr21                    | 0                         | FAIL                   | NA          | NA        | NA                 | NA          | NA           | NA      |
| chr22                    | 0                         | FAIL                   | NA          | NA        | NA                 | NA          | NA           | NA      |
| chrX:129111024-129180372 | 0                         | FAIL                   | FAIL        | FAIL      | FAIL               | NA          | NA           | NA      |
| chrY                     | 0                         | FAIL                   | NA          | NA        | NA                 | NA          | NA           | NA      |

PCSI\_0146\_Pa\_P\_526

|                          | Total Pass: Chromosome(s) | Window ID with >= 8 SV | Window Join | Window AR | Window Oscillation | Window Type | Window Chain | Overall |
|--------------------------|---------------------------|------------------------|-------------|-----------|--------------------|-------------|--------------|---------|
| chr1                     | 2                         | FAIL                   | NA          | NA        | NA                 | NA          | NA           | NA      |
| chr2                     | 0                         | FAIL                   | NA          | NA        | NA                 | NA          | NA           | NA      |
| chr3                     | 0                         | FAIL                   | NA          | NA        | NA                 | NA          | NA           | NA      |
| chr4                     | 0                         | FAIL                   | NA          | NA        | NA                 | NA          | NA           | NA      |
| chr5                     | 0                         | FAIL                   | NA          | NA        | NA                 | NA          | NA           | NA      |
| chr6                     | 0                         | FAIL                   | NA          | NA        | NA                 | NA          | NA           | NA      |
| chr7                     | 0                         | FAIL                   | NA          | NA        | NA                 | NA          | NA           | NA      |
| chr8:104070061-104180047 | 0                         | FAIL                   | FAIL        | FAIL      | FAIL               | NA          | NA           | NA      |
| chr9:21791001-33139155   | 0                         | FAIL                   | FAIL        | FAIL      | FAIL               | NA          | NA           | NA      |
| chr10                    | 0                         | FAIL                   | NA          | NA        | NA                 | NA          | NA           | NA      |
| chr11                    | 0                         | FAIL                   | NA          | NA        | NA                 | NA          | NA           | NA      |
| chr12                    | 0                         | FAIL                   | NA          | NA        | NA                 | NA          | NA           | NA      |
| chr13                    | 0                         | FAIL                   | NA          | NA        | NA                 | NA          | NA           | NA      |
| chr14                    | 0                         | FAIL                   | NA          | NA        | NA                 | NA          | NA           | NA      |
| chr15                    | 0                         | FAIL                   | NA          | NA        | NA                 | NA          | NA           | NA      |
| chr16                    | 0                         | FAIL                   | NA          | NA        | NA                 | NA          | NA           | NA      |
| chr17                    | 0                         | FAIL                   | NA          | NA        | NA                 | NA          | NA           | NA      |
| chr18                    | 0                         | FAIL                   | NA          | NA        | NA                 | NA          | NA           | NA      |
| chr19                    | 0                         | FAIL                   | NA          | NA        | NA                 | NA          | NA           | NA      |
| chr20                    | 1                         | FAIL                   | NA          | NA        | NA                 | NA          | NA           | NA      |
| chr21                    | 0                         | FAIL                   | NA          | NA        | NA                 | NA          | NA           | NA      |
| chr22                    | 0                         | FAIL                   | NA          | NA        | NA                 | NA          | NA           | NA      |
| chrX                     | 0                         | FAIL                   | NA          | NA        | NA                 | NA          | NA           | NA      |
| chrY                     | 0                         | FAIL                   | NA          | NA        | NA                 | NA          | NA           | NA      |

PCSI\_0161\_Pa\_P\_526

|                          | Total Pass: Chromosome(s) | Window ID with >= 8 SV | Window Join | Window AR | Window Oscillation | Window Type | Window Chain | Overall |
|--------------------------|---------------------------|------------------------|-------------|-----------|--------------------|-------------|--------------|---------|
| chr1                     | 2                         | FAIL                   | NA          | NA        | NA                 | NA          | NA           | NA      |
| chr2                     | 4                         | FAIL                   | NA          | NA        | NA                 | NA          | NA           | NA      |
| chr3                     | 5                         | FAIL                   | NA          | NA        | NA                 | NA          | NA           | NA      |
| chr4                     | 2                         | FAIL                   | NA          | NA        | NA                 | NA          | NA           | NA      |
| chr5                     | 0                         | FAIL                   | NA          | NA        | NA                 | NA          | NA           | NA      |
| chr6:57977460-62517020   | 5                         | FAIL                   | FAIL        | FAIL      | FAIL               | NA          | NA           | NA      |
| chr7                     | 1                         | FAIL                   | NA          | NA        | NA                 | NA          | NA           | NA      |
| chr8                     | 0                         | FAIL                   | NA          | NA        | NA                 | NA          | NA           | NA      |
| chr9:9045173-9817351     | 4                         | FAIL                   | FAIL        | FAIL      | FAIL               | NA          | NA           | NA      |
| chr10                    | 2                         | FAIL                   | NA          | NA        | NA                 | NA          | NA           | NA      |
| chr11                    | 4                         | FAIL                   | NA          | NA        | NA                 | NA          | NA           | NA      |
| chr12                    | 5                         | FAIL                   | NA          | NA        | NA                 | NA          | NA           | NA      |
| chr13                    | 3                         | FAIL                   | NA          | NA        | NA                 | NA          | NA           | NA      |
| chr14                    | 2                         | FAIL                   | NA          | NA        | NA                 | NA          | NA           | NA      |
| chr15                    | 1                         | FAIL                   | NA          | NA        | NA                 | NA          | NA           | NA      |
| chr16:78585001-78893000  | 5                         | FAIL                   | FAIL        | FAIL      | PASS               | NA          | NA           | NA      |
| chr17                    | 2                         | FAIL                   | NA          | NA        | NA                 | NA          | NA           | NA      |
| chr18                    | 1                         | FAIL                   | NA          | NA        | NA                 | NA          | NA           | NA      |
| chr19:5145980-6164000    | 1                         | FAIL                   | FAIL        | FAIL      | FAIL               | NA          | NA           | NA      |
| chr20                    | 1                         | FAIL                   | NA          | NA        | NA                 | NA          | NA           | NA      |
| chr21                    | 0                         | FAIL                   | NA          | NA        | NA                 | NA          | NA           | NA      |
| chr22                    | 1                         | FAIL                   | NA          | NA        | NA                 | NA          | NA           | NA      |
| chrX:5327741-5429856     | 3                         | FAIL                   | FAIL        | FAIL      | FAIL               | NA          | NA           | NA      |
| chrX:6007762-6081902     | 3                         | FAIL                   | FAIL        | FAIL      | FAIL               | NA          | NA           | NA      |
| chrX:9869439-10013720    | 3                         | FAIL                   | FAIL        | FAIL      | FAIL               | NA          | NA           | NA      |
| chrX:119846237-119910037 | 3                         | FAIL                   | FAIL        | FAIL      | FAIL               | NA          | NA           | NA      |
| chrY                     | 0                         | FAIL                   | NA          | NA        | NA                 | NA          | NA           | NA      |

PCSI\_0164\_Pa\_P\_526

|       | Total Pass: Chromosome(s) | Window ID with >= 8 SV | Window Join | Window AR | Window Oscillation | Window Type | Window Chain | Overall |
|-------|---------------------------|------------------------|-------------|-----------|--------------------|-------------|--------------|---------|
| chr1  | 0                         | FAIL                   | NA          | NA        | NA                 | NA          | NA           | NA      |
| chr2  | 0                         | FAIL                   | NA          | NA        | NA                 | NA          | NA           | NA      |
| chr3  | 0                         | FAIL                   | NA          | NA        | NA                 | NA          | NA           | NA      |
| chr4  | 2                         | FAIL                   | NA          | NA        | NA                 | NA          | NA           | NA      |
| chr5  | 0                         | FAIL                   | NA          | NA        | NA                 | NA          | NA           | NA      |
| chr6  | 0                         | FAIL                   | NA          | NA        | NA                 | NA          | NA           | NA      |
| chr7  | 0                         | FAIL                   | NA          | NA        | NA                 | NA          | NA           | NA      |
| chr8  | 0                         | FAIL                   | NA          | NA        | NA                 | NA          | NA           | NA      |
| chr9  | 0                         | FAIL                   | NA          | NA        | NA                 | NA          | NA           | NA      |
| chr10 | 0                         | FAIL                   | NA          | NA        | NA                 | NA          | NA           | NA      |
| chr11 | 0                         | FAIL                   | NA          | NA        | NA                 | NA          | NA           | NA      |
| chr12 | 0                         | FAIL                   | NA          | NA        | NA                 | NA          | NA           | NA      |
| chr13 | 0                         | FAIL                   | NA          | NA        | NA                 | NA          | NA           | NA      |
| chr14 | 0                         | FAIL                   | NA          | NA        | NA                 | NA          | NA           | NA      |
| chr15 | 0                         | FAIL                   | NA          | NA        | NA                 | NA          | NA           | NA      |
| chr16 | 0                         | FAIL                   | NA          | NA        | NA                 | NA          | NA           | NA      |
| chr17 | 0                         | FAIL                   | NA          | NA        | NA                 | NA          | NA           | NA      |
| chr18 | 0                         | FAIL                   | NA          | NA        | NA                 | NA          | NA           | NA      |
| chr19 | 0                         | FAIL                   | NA          | NA        | NA                 | NA          | NA           | NA      |
| chr20 | 0                         | FAIL                   | NA          | NA        | NA                 | NA          | NA           | NA      |
| chr21 | 0                         | FAIL                   | NA          | NA        | NA                 | NA          | NA           | NA      |
| chr22 | 0                         | FAIL                   | NA          | NA        | NA                 | NA          | NA           | NA      |
| chrX  | 0                         | FAIL                   | NA          | NA        | NA                 | NA          | NA           | NA      |
| chrY  | 0                         | FAIL                   | NA          | NA        | NA                 | NA          | NA           | NA      |

PCSI\_0218\_Pa\_P\_526

|                          | Total Pass: Chromosome(s) | Window ID with >= 8 SV | Window Join | Window AR | Window Oscillation | Window Type | Window Chain                                   | Overall |
|--------------------------|---------------------------|------------------------|-------------|-----------|--------------------|-------------|------------------------------------------------|---------|
| chr1                     | 3                         | FAIL                   | NA          | NA        | NA                 | NA          | NA                                             | NA      |
| chr2:63172857-72099683   | 1                         | FAIL                   | FAIL        | FAIL      | FAIL               | NA          | NA                                             | NA      |
| chr3                     | 2                         | FAIL                   | NA          | NA        | NA                 | NA          | NA                                             | NA      |
| chr4:100941380-108888000 | 2                         | FAIL                   | FAIL        | FAIL      | FAIL               | NA          | NA                                             | NA      |
| chr5:59991582-105538439  | 0                         | FAIL                   | FAIL        | FAIL      | FAIL               | NA          | NA                                             | NA      |
| chr6                     | 1                         | FAIL                   | NA          | NA        | NA                 | NA          | NA                                             | NA      |
| chr7:33875149-136458590  | 1                         | FAIL                   | FAIL        | FAIL      | FAIL               | inter       | NA                                             | NA      |
| chr8                     | 2                         | FAIL                   | NA          | NA        | NA                 | NA          | NA                                             | NA      |
| chr9:36387423-137861371  | 2                         | FAIL                   | FAIL        | FAIL      | FAIL               | NA          | NA                                             | NA      |
| chr10:31030912-55837000  | 1                         | FAIL                   | FAIL        | FAIL      | FAIL               | NA          | NA                                             | NA      |
| chr11:41947195-97467037  | 2                         | FAIL                   | FAIL        | FAIL      | FAIL               | NA          | NA                                             | NA      |
| chr12:75885389-90439318  | 1                         | FAIL                   | FAIL        | FAIL      | FAIL               | NA          | NA                                             | NA      |
| chr13:30751725-30764958  | 2                         | FAIL                   | FAIL        | FAIL      | FAIL               | chain       | chr13:30751725-30764958, chr16:7205775-7218220 | NA      |
| chr13:46539001-102069000 | 2                         | FAIL                   | FAIL        | FAIL      | FAIL               | NA          | NA                                             | NA      |
| chr14                    | 0                         | FAIL                   | NA          | NA        | NA                 | NA          | NA                                             | NA      |
| chr15:76933873-76946840  | 0                         | FAIL                   | FAIL        | FAIL      | FAIL               | NA          | NA                                             | NA      |
| chr16:7205775-7218220    | 0                         | FAIL                   | FAIL        | FAIL      | FAIL               | chain       | chr13:30751725-30764958, chr16:7205775-7218220 | NA      |
| chr17                    | 1                         | FAIL                   | NA          | NA        | NA                 | NA          | NA                                             | NA      |
| chr18                    | 0                         | FAIL                   | NA          | NA        | NA                 | NA          | NA                                             | NA      |
| chr19                    | 0                         | FAIL                   | NA          | NA        | NA                 | NA          | NA                                             | NA      |
| chr20                    | 0                         | FAIL                   | NA          | NA        | NA                 | NA          | NA                                             | NA      |
| chr21                    | 0                         | FAIL                   | NA          | NA        | NA                 | NA          | NA                                             | NA      |
| chr22                    | 0                         | FAIL                   | NA          | NA        | NA                 | NA          | NA                                             | NA      |
| chrX                     | 0                         | FAIL                   | NA          | NA        | NA                 | NA          | NA                                             | NA      |
| chrY                     | 0                         | FAIL                   | NA          | NA        | NA                 | NA          | NA                                             | NA      |

PCSI\_0227\_Pa\_P\_526

|                          | Total Pass: Chromosome(s) | Window ID with >= 8 SV | Window Join | Window AR | Window Oscillation | Window Type | Window Chain                                     | Overall |
|--------------------------|---------------------------|------------------------|-------------|-----------|--------------------|-------------|--------------------------------------------------|---------|
| chr1                     | 2                         | FAIL                   | NA          | NA        | NA                 | NA          | NA                                               | NA      |
| chr2:23708603-234411307  | 0                         | FAIL                   | FAIL        | FAIL      | FAIL               | inter       | NA                                               | NA      |
| chr3                     | 0                         | FAIL                   | NA          | NA        | NA                 | NA          | NA                                               | NA      |
| chr4                     | 0                         | FAIL                   | NA          | NA        | NA                 | NA          | NA                                               | NA      |
| chr5                     | 0                         | FAIL                   | NA          | NA        | NA                 | NA          | NA                                               | NA      |
| chr6:48762914-98653504   | 3                         | FAIL                   | FAIL        | FAIL      | FAIL               | NA          | NA                                               | NA      |
| chr6:130205062-132271653 | 3                         | FAIL                   | FAIL        | FAIL      | FAIL               | NA          | NA                                               | NA      |
| chr7                     | 0                         | FAIL                   | NA          | NA        | NA                 | NA          | NA                                               | NA      |
| chr8                     | 0                         | FAIL                   | NA          | NA        | NA                 | NA          | NA                                               | NA      |
| chr9:20305001-27310000   | 4                         | FAIL                   | FAIL        | FAIL      | FAIL               | NA          | NA                                               | NA      |
| chr10                    | 0                         | FAIL                   | NA          | NA        | NA                 | NA          | NA                                               | NA      |
| chr11                    | 1                         | FAIL                   | NA          | NA        | NA                 | NA          | NA                                               | NA      |
| chr12                    | 0                         | FAIL                   | NA          | NA        | NA                 | NA          | NA                                               | NA      |
| chr13                    | 0                         | FAIL                   | NA          | NA        | NA                 | NA          | NA                                               | NA      |
| chr14                    | 0                         | FAIL                   | NA          | NA        | NA                 | NA          | NA                                               | NA      |
| chr15                    | 0                         | FAIL                   | NA          | NA        | NA                 | NA          | NA                                               | NA      |
| chr16                    | 0                         | FAIL                   | NA          | NA        | NA                 | NA          | NA                                               | NA      |
| chr17:21960458-26570072  | 2                         | FAIL                   | FAIL        | FAIL      | FAIL               | chain       | chr17:21960458-26570072, chr18:22715768-71713195 | NA      |
| chr18:22715768-71713195  | 1                         | FAIL                   | FAIL        | PASS      | FAIL               | chain       | chr17:21960458-26570072, chr18:22715768-71713195 | NA      |
| chr19                    | 0                         | FAIL                   | NA          | NA        | NA                 | NA          | NA                                               | NA      |
| chr20                    | 0                         | FAIL                   | NA          | NA        | NA                 | NA          | NA                                               | NA      |
| chr21                    | 0                         | FAIL                   | NA          | NA        | NA                 | NA          | NA                                               | NA      |
| chr22                    | 0                         | FAIL                   | NA          | NA        | NA                 | NA          | NA                                               | NA      |
| chrX                     | 0                         | FAIL                   | NA          | NA        | NA                 | NA          | NA                                               | NA      |
| chrY                     | 0                         | FAIL                   | NA          | NA        | NA                 | NA          | NA                                               | NA      |

PCSI\_0264\_Pa\_P\_526

|                          | Total Pass: Chromosome(%) | Window ID with >= 8 SV | Window Join | Window AR | Window Oscillation | Window Type | Window Chain                                  | Overall |
|--------------------------|---------------------------|------------------------|-------------|-----------|--------------------|-------------|-----------------------------------------------|---------|
| chr1                     | 0                         | FAIL                   | NA          | NA        | NA                 | NA          | NA                                            | NA      |
| chr2:65236001-81409000   | 2                         | FAIL                   | FAIL        | FAIL      | FAIL               | chain       | chr2:65236001-81409000, chr3:4067421-74942000 | NA      |
| chr3:4067421-74942000    | 5                         | PASS                   | FAIL        | PASS      | FAIL               | chain       | chr2:65236001-81409000, chr3:4067421-74942000 | NA      |
| chr4                     | 0                         | FAIL                   | NA          | NA        | NA                 | NA          | NA                                            | NA      |
| chr5                     | 0                         | FAIL                   | NA          | NA        | NA                 | NA          | NA                                            | NA      |
| chr6                     | 0                         | FAIL                   | NA          | NA        | NA                 | NA          | NA                                            | NA      |
| chr7                     | 0                         | FAIL                   | NA          | NA        | NA                 | NA          | NA                                            | NA      |
| chr8                     | 0                         | FAIL                   | NA          | NA        | NA                 | NA          | NA                                            | NA      |
| chr9                     | 5                         | FAIL                   | NA          | NA        | NA                 | NA          | NA                                            | NA      |
| chr10                    | 0                         | FAIL                   | NA          | NA        | NA                 | NA          | NA                                            | NA      |
| chr11                    | 0                         | FAIL                   | NA          | NA        | NA                 | NA          | NA                                            | NA      |
| chr12                    | 0                         | FAIL                   | NA          | NA        | NA                 | NA          | NA                                            | NA      |
| chr13                    | 0                         | FAIL                   | NA          | NA        | NA                 | NA          | NA                                            | NA      |
| chr14                    | 0                         | FAIL                   | NA          | NA        | NA                 | NA          | NA                                            | NA      |
| chr15:2010623-10204524   | 0                         | FAIL                   | FAIL        | FAIL      | FAIL               | NA          | NA                                            | NA      |
| chr16                    | 0                         | FAIL                   | NA          | NA        | NA                 | NA          | NA                                            | NA      |
| chr17                    | 0                         | FAIL                   | NA          | NA        | NA                 | NA          | NA                                            | NA      |
| chr18:28016599-28029332  | 0                         | FAIL                   | FAIL        | FAIL      | FAIL               | NA          | NA                                            | NA      |
| chr19                    | 0                         | FAIL                   | NA          | NA        | NA                 | NA          | NA                                            | NA      |
| chr20                    | 0                         | FAIL                   | NA          | NA        | NA                 | NA          | NA                                            | NA      |
| chr21                    | 0                         | FAIL                   | NA          | NA        | NA                 | NA          | NA                                            | NA      |
| chr22                    | 0                         | FAIL                   | NA          | NA        | NA                 | NA          | NA                                            | NA      |
| chrX:63028017-12658620   | 0                         | FAIL                   | FAIL        | FAIL      | FAIL               | NA          | NA                                            | NA      |
| chrX:140224516-150435658 | 0                         | FAIL                   | FAIL        | FAIL      | FAIL               | NA          | NA                                            | NA      |
| chrY                     | 0                         | FAIL                   | NA          | NA        | NA                 | NA          | NA                                            | NA      |

PCSI\_0269\_Pa\_P\_526

|                         | Total Pass: Chromosome(%) | Window ID with >= 8 SV | Window Join | Window AR | Window Oscillation | Window Type | Window Chain                                    | Overall |
|-------------------------|---------------------------|------------------------|-------------|-----------|--------------------|-------------|-------------------------------------------------|---------|
| chr1                    | 2                         | FAIL                   | NA          | NA        | NA                 | NA          | NA                                              | NA      |
| chr2                    | 1                         | FAIL                   | NA          | NA        | NA                 | NA          | NA                                              | NA      |
| chr3:86258639-172815066 | 3                         | FAIL                   | FAIL        | FAIL      | FAIL               | NA          | NA                                              | NA      |
| chr4                    | 0                         | FAIL                   | NA          | NA        | NA                 | NA          | NA                                              | NA      |
| chr5:52986042-84562289  | 1                         | FAIL                   | FAIL        | FAIL      | FAIL               | chain       | chr21:20385537-24988220, chr5:52986042-84562289 | NA      |
| chr6                    | 0                         | FAIL                   | NA          | NA        | NA                 | NA          | NA                                              | NA      |
| chr7                    | 0                         | FAIL                   | NA          | NA        | NA                 | NA          | NA                                              | NA      |
| chr8                    | 0                         | FAIL                   | NA          | NA        | NA                 | NA          | NA                                              | NA      |
| chr9                    | 0                         | FAIL                   | NA          | NA        | NA                 | NA          | NA                                              | NA      |
| chr10                   | 2                         | FAIL                   | NA          | NA        | NA                 | NA          | NA                                              | NA      |
| chr11                   | 0                         | FAIL                   | NA          | NA        | NA                 | NA          | NA                                              | NA      |
| chr12                   | 0                         | FAIL                   | NA          | NA        | NA                 | NA          | NA                                              | NA      |
| chr13                   | 0                         | FAIL                   | NA          | NA        | NA                 | NA          | NA                                              | NA      |
| chr14                   | 0                         | FAIL                   | NA          | NA        | NA                 | NA          | NA                                              | NA      |
| chr15                   | 0                         | FAIL                   | NA          | NA        | NA                 | NA          | NA                                              | NA      |
| chr16                   | 0                         | FAIL                   | NA          | NA        | NA                 | NA          | NA                                              | NA      |
| chr17:46341115-47113000 | 1                         | FAIL                   | FAIL        | FAIL      | FAIL               | NA          | NA                                              | NA      |
| chr18                   | 0                         | FAIL                   | NA          | NA        | NA                 | NA          | NA                                              | NA      |
| chr19                   | 0                         | FAIL                   | NA          | NA        | NA                 | NA          | NA                                              | NA      |
| chr20                   | 0                         | FAIL                   | NA          | NA        | NA                 | NA          | NA                                              | NA      |
| chr21:20385537-24988220 | 2                         | FAIL                   | FAIL        | FAIL      | FAIL               | chain       | chr21:20385537-24988220, chr5:52986042-84562289 | NA      |
| chr22                   | 0                         | FAIL                   | NA          | NA        | NA                 | NA          | NA                                              | NA      |
| chrX                    | 0                         | FAIL                   | NA          | NA        | NA                 | NA          | NA                                              | NA      |
| chrY                    | 0                         | FAIL                   | NA          | NA        | NA                 | NA          | NA                                              | NA      |

PCSI\_0292\_Pa\_P\_526

|                          | Total Pass: Chromosome(%) | Window ID with >= 8 SV | Window Join | Window AR | Window Oscillation | Window Type | Window Chain | Overall |
|--------------------------|---------------------------|------------------------|-------------|-----------|--------------------|-------------|--------------|---------|
| chr1:92759615-118700152  | 3                         | FAIL                   | FAIL        | FAIL      | FAIL               | NA          | NA           | NA      |
| chr2                     | 1                         | FAIL                   | NA          | NA        | NA                 | NA          | NA           | NA      |
| chr3                     | 3                         | FAIL                   | NA          | NA        | NA                 | NA          | NA           | NA      |
| chr4                     | 1                         | FAIL                   | NA          | NA        | NA                 | NA          | NA           | NA      |
| chr5:57359001-83127060   | 2                         | FAIL                   | FAIL        | FAIL      | FAIL               | NA          | NA           | NA      |
| chr6                     | 1                         | FAIL                   | NA          | NA        | NA                 | NA          | NA           | NA      |
| chr7:79415678-115982431  | 3                         | FAIL                   | FAIL        | FAIL      | FAIL               | NA          | NA           | NA      |
| chr8                     | 2                         | FAIL                   | NA          | NA        | NA                 | NA          | NA           | NA      |
| chr9                     | 3                         | FAIL                   | NA          | NA        | NA                 | NA          | NA           | NA      |
| chr10                    | 4                         | FAIL                   | NA          | NA        | NA                 | NA          | NA           | NA      |
| chr11:79190816-126602773 | 4                         | FAIL                   | PASS        | PASS      | FAIL               | inter       | NA           | NA      |
| chr12                    | 1                         | FAIL                   | NA          | NA        | NA                 | NA          | NA           | NA      |
| chr13                    | 1                         | FAIL                   | NA          | NA        | NA                 | NA          | NA           | NA      |
| chr14                    | 0                         | FAIL                   | NA          | NA        | NA                 | NA          | NA           | NA      |
| chr15                    | 0                         | FAIL                   | NA          | NA        | NA                 | NA          | NA           | NA      |
| chr16                    | 0                         | FAIL                   | NA          | NA        | NA                 | NA          | NA           | NA      |
| chr17                    | 0                         | FAIL                   | NA          | NA        | NA                 | NA          | NA           | NA      |
| chr18:31054660-64639000  | 1                         | FAIL                   | FAIL        | FAIL      | FAIL               | NA          | NA           | NA      |
| chr19                    | 0                         | FAIL                   | NA          | NA        | NA                 | NA          | NA           | NA      |
| chr20                    | 0                         | FAIL                   | NA          | NA        | NA                 | NA          | NA           | NA      |
| chr21                    | 0                         | FAIL                   | NA          | NA        | NA                 | NA          | NA           | NA      |
| chr22                    | 0                         | FAIL                   | NA          | NA        | NA                 | NA          | NA           | NA      |
| chrX                     | 1                         | FAIL                   | NA          | NA        | NA                 | NA          | NA           | NA      |
| chrY                     | 0                         | FAIL                   | NA          | NA        | NA                 | NA          | NA           | NA      |

PCSI\_0294\_Pa\_P\_526

|                          | Total Pass: Chromosome(%) | Window ID with >= 8 SV | Window Join | Window AR | Window Oscillation | Window Type | Window Chain                                      | Overall |
|--------------------------|---------------------------|------------------------|-------------|-----------|--------------------|-------------|---------------------------------------------------|---------|
| chr1                     | 0                         | FAIL                   | NA          | NA        | NA                 | NA          | NA                                                | NA      |
| chr2                     | 1                         | FAIL                   | NA          | NA        | NA                 | NA          | NA                                                | NA      |
| chr3                     | 0                         | FAIL                   | NA          | NA        | NA                 | NA          | NA                                                | NA      |
| chr4                     | 0                         | FAIL                   | NA          | NA        | NA                 | NA          | NA                                                | NA      |
| chr5:127802118-127814452 | 0                         | FAIL                   | FAIL        | FAIL      | FAIL               | chain       | chr18:24774001-24781473, chr5:127802118-127814452 | NA      |
| chr6                     | 1                         | FAIL                   | NA          | NA        | NA                 | NA          | NA                                                | NA      |
| chr7                     | 0                         | FAIL                   | NA          | NA        | NA                 | NA          | NA                                                | NA      |
| chr8:34588001-35185405   | 0                         | FAIL                   | FAIL        | FAIL      | FAIL               | NA          | NA                                                | NA      |
| chr9                     | 0                         | FAIL                   | NA          | NA        | NA                 | NA          | NA                                                | NA      |
| chr10                    | 0                         | FAIL                   | NA          | NA        | NA                 | NA          | NA                                                | NA      |
| chr11                    | 0                         | FAIL                   | NA          | NA        | NA                 | NA          | NA                                                | NA      |
| chr12                    | 0                         | FAIL                   | NA          | NA        | NA                 | NA          | NA                                                | NA      |
| chr13                    | 0                         | FAIL                   | NA          | NA        | NA                 | NA          | NA                                                | NA      |
| chr14                    | 0                         | FAIL                   | NA          | NA        | NA                 | NA          | NA                                                | NA      |
| chr15                    | 0                         | FAIL                   | NA          | NA        | NA                 | NA          | NA                                                | NA      |
| chr16                    | 0                         | FAIL                   | NA          | NA        | NA                 | NA          | NA                                                | NA      |
| chr17                    | 0                         | FAIL                   | NA          | NA        | NA                 | NA          | NA                                                | NA      |
| chr18:24774001-24781473  | 4                         | FAIL                   | FAIL        | FAIL      | FAIL               | chain       | chr18:24774001-24781473, chr5:127802118-127814452 | NA      |
| chr19                    | 0                         | FAIL                   | NA          | NA        | NA                 | NA          | NA                                                | NA      |
| chr20                    | 0                         | FAIL                   | NA          | NA        | NA                 | NA          | NA                                                | NA      |
| chr21                    | 0                         | FAIL                   | NA          | NA        | NA                 | NA          | NA                                                | NA      |
| chr22                    | 0                         | FAIL                   | NA          | NA        | NA                 | NA          | NA                                                | NA      |
| chrX                     | 0                         | FAIL                   | NA          | NA        | NA                 | NA          | NA                                                | NA      |
| chrY                     | 0                         | FAIL                   | NA          | NA        | NA                 | NA          | NA                                                | NA      |

PCSI\_0310\_Pa\_P\_526

|                         | Total Pass: Chromosome(s) | Window ID with >= 8 SV | Window Join | Window AR | Window Oscillation | Window Type | Window Chain | Overall |
|-------------------------|---------------------------|------------------------|-------------|-----------|--------------------|-------------|--------------|---------|
| chr1                    | 2                         | FAIL                   | NA          | NA        | NA                 | NA          | NA           | NA      |
| chr2                    | 1                         | FAIL                   | NA          | NA        | NA                 | NA          | NA           | NA      |
| chr3                    | 2                         | FAIL                   | NA          | NA        | NA                 | NA          | NA           | NA      |
| chr4                    | 0                         | FAIL                   | NA          | NA        | NA                 | NA          | NA           | NA      |
| chr5:5037882-121945000  | 1                         | FAIL                   | FAIL        | FAIL      | FAIL               | NA          | NA           | NA      |
| chr6                    | 1                         | FAIL                   | NA          | NA        | NA                 | NA          | NA           | NA      |
| chr7                    | 3                         | FAIL                   | NA          | NA        | NA                 | NA          | NA           | NA      |
| chr8                    | 2                         | FAIL                   | NA          | NA        | NA                 | NA          | NA           | NA      |
| chr9                    | 1                         | FAIL                   | NA          | NA        | NA                 | NA          | NA           | NA      |
| chr10                   | 1                         | FAIL                   | NA          | NA        | NA                 | NA          | NA           | NA      |
| chr11                   | 2                         | FAIL                   | NA          | NA        | NA                 | NA          | NA           | NA      |
| chr12                   | 1                         | FAIL                   | NA          | NA        | NA                 | NA          | NA           | NA      |
| chr13                   | 0                         | FAIL                   | NA          | NA        | NA                 | NA          | NA           | NA      |
| chr14                   | 0                         | FAIL                   | NA          | NA        | NA                 | NA          | NA           | NA      |
| chr15                   | 0                         | FAIL                   | NA          | NA        | NA                 | NA          | NA           | NA      |
| chr16                   | 1                         | FAIL                   | NA          | NA        | NA                 | NA          | NA           | NA      |
| chr17:31305525-43847205 | 3                         | FAIL                   | FAIL        | PASS      | FAIL               | NA          | NA           | NA      |
| chr18                   | 0                         | FAIL                   | NA          | NA        | NA                 | NA          | NA           | NA      |
| chr19                   | 0                         | FAIL                   | NA          | NA        | NA                 | NA          | NA           | NA      |
| chr20                   | 0                         | FAIL                   | NA          | NA        | NA                 | NA          | NA           | NA      |
| chr21                   | 0                         | FAIL                   | NA          | NA        | NA                 | NA          | NA           | NA      |
| chr22:27066872-2710217  | 0                         | FAIL                   | FAIL        | FAIL      | FAIL               | NA          | NA           | NA      |
| chrX:1760425-17630853   | 0                         | FAIL                   | FAIL        | FAIL      | FAIL               | NA          | NA           | NA      |
| chrY                    | 0                         | FAIL                   | NA          | NA        | NA                 | NA          | NA           | NA      |

PCSI\_0312\_Pa\_P\_526

|                       | Total Pass: Chromosome(s) | Window ID with >= 8 SV | Window Join | Window AR | Window Oscillation | Window Type | Window Chain | Overall |
|-----------------------|---------------------------|------------------------|-------------|-----------|--------------------|-------------|--------------|---------|
| chr1                  | 0                         | FAIL                   | NA          | NA        | NA                 | NA          | NA           | NA      |
| chr2                  | 0                         | FAIL                   | NA          | NA        | NA                 | NA          | NA           | NA      |
| chr3                  | 0                         | FAIL                   | NA          | NA        | NA                 | NA          | NA           | NA      |
| chr4                  | 0                         | FAIL                   | NA          | NA        | NA                 | NA          | NA           | NA      |
| chr5                  | 0                         | FAIL                   | NA          | NA        | NA                 | NA          | NA           | NA      |
| chr6                  | 0                         | FAIL                   | NA          | NA        | NA                 | NA          | NA           | NA      |
| chr7                  | 0                         | FAIL                   | NA          | NA        | NA                 | NA          | NA           | NA      |
| chr8                  | 0                         | FAIL                   | NA          | NA        | NA                 | NA          | NA           | NA      |
| chr9:8692374-30515171 | 3                         | FAIL                   | FAIL        | PASS      | FAIL               | NA          | NA           | NA      |
| chr10                 | 0                         | FAIL                   | NA          | NA        | NA                 | NA          | NA           | NA      |
| chr11                 | 0                         | FAIL                   | NA          | NA        | NA                 | NA          | NA           | NA      |
| chr12                 | 0                         | FAIL                   | NA          | NA        | NA                 | NA          | NA           | NA      |
| chr13                 | 0                         | FAIL                   | NA          | NA        | NA                 | NA          | NA           | NA      |
| chr14                 | 0                         | FAIL                   | NA          | NA        | NA                 | NA          | NA           | NA      |
| chr15                 | 1                         | FAIL                   | NA          | NA        | NA                 | NA          | NA           | NA      |
| chr16                 | 0                         | FAIL                   | NA          | NA        | NA                 | NA          | NA           | NA      |
| chr17                 | 2                         | FAIL                   | NA          | NA        | NA                 | NA          | NA           | NA      |
| chr18                 | 1                         | FAIL                   | NA          | NA        | NA                 | NA          | NA           | NA      |
| chr19                 | 0                         | FAIL                   | NA          | NA        | NA                 | NA          | NA           | NA      |
| chr20                 | 0                         | FAIL                   | NA          | NA        | NA                 | NA          | NA           | NA      |
| chr21                 | 0                         | FAIL                   | NA          | NA        | NA                 | NA          | NA           | NA      |
| chr22                 | 0                         | FAIL                   | NA          | NA        | NA                 | NA          | NA           | NA      |
| chrX                  | 0                         | FAIL                   | NA          | NA        | NA                 | NA          | NA           | NA      |
| chrY                  | 0                         | FAIL                   | NA          | NA        | NA                 | NA          | NA           | NA      |

PCSI\_0329\_Pa\_P\_526

|                          | Total Pass: Chromosome(s) | Window ID with >= 8 SV | Window Join | Window AR | Window Oscillation | Window Type | Window Chain                                     | Overall |
|--------------------------|---------------------------|------------------------|-------------|-----------|--------------------|-------------|--------------------------------------------------|---------|
| chr1                     | 0                         | FAIL                   | NA          | NA        | NA                 | NA          | NA                                               | NA      |
| chr2                     | 0                         | FAIL                   | NA          | NA        | NA                 | NA          | NA                                               | NA      |
| chr3                     | 0                         | FAIL                   | NA          | NA        | NA                 | NA          | NA                                               | NA      |
| chr4                     | 0                         | FAIL                   | NA          | NA        | NA                 | NA          | NA                                               | NA      |
| chr5:178817607-179832210 | 1                         | FAIL                   | FAIL        | FAIL      | FAIL               | NA          | NA                                               | NA      |
| chr6                     | 0                         | FAIL                   | NA          | NA        | NA                 | NA          | NA                                               | NA      |
| chr7                     | 0                         | FAIL                   | NA          | NA        | NA                 | NA          | NA                                               | NA      |
| chr8                     | 0                         | FAIL                   | NA          | NA        | NA                 | NA          | NA                                               | NA      |
| chr9                     | 1                         | FAIL                   | NA          | NA        | NA                 | NA          | NA                                               | NA      |
| chr10                    | 0                         | FAIL                   | NA          | NA        | NA                 | NA          | NA                                               | NA      |
| chr11                    | 0                         | FAIL                   | NA          | NA        | NA                 | NA          | NA                                               | NA      |
| chr12                    | 0                         | FAIL                   | NA          | NA        | NA                 | NA          | NA                                               | NA      |
| chr13                    | 0                         | FAIL                   | NA          | NA        | NA                 | NA          | NA                                               | NA      |
| chr14                    | 0                         | FAIL                   | NA          | NA        | NA                 | NA          | NA                                               | NA      |
| chr15:28264230-87789199  | 2                         | FAIL                   | FAIL        | PASS      | FAIL               | chain       | chr15:28264230-87789199, chr22:29534957-30134090 | NA      |
| chr16                    | 0                         | FAIL                   | NA          | NA        | NA                 | NA          | NA                                               | NA      |
| chr17                    | 0                         | FAIL                   | NA          | NA        | NA                 | NA          | NA                                               | NA      |
| chr18                    | 0                         | FAIL                   | NA          | NA        | NA                 | NA          | NA                                               | NA      |
| chr19                    | 0                         | FAIL                   | NA          | NA        | NA                 | NA          | NA                                               | NA      |
| chr20:60370014-60388248  | 4                         | FAIL                   | FAIL        | FAIL      | FAIL               | NA          | NA                                               | NA      |
| chr21                    | 0                         | FAIL                   | NA          | NA        | NA                 | NA          | NA                                               | NA      |
| chr22:29534957-30134090  | 2                         | FAIL                   | FAIL        | FAIL      | FAIL               | chain       | chr15:28264230-87789199, chr22:29534957-30134090 | NA      |
| chrX:8608047-9996024     | 0                         | FAIL                   | FAIL        | FAIL      | FAIL               | NA          | NA                                               | NA      |
| chrX:13880513-39211380   | 0                         | FAIL                   | FAIL        | FAIL      | FAIL               | NA          | NA                                               | NA      |
| chrY                     | 0                         | FAIL                   | NA          | NA        | NA                 | NA          | NA                                               | NA      |

PCSI\_0344\_Pa\_P\_526

|                         | Total Pass: Chromosome(s) | Window ID with >= 8 SV | Window Join | Window AR | Window Oscillation | Window Type | Window Chain | Overall |
|-------------------------|---------------------------|------------------------|-------------|-----------|--------------------|-------------|--------------|---------|
| chr1                    | 0                         | FAIL                   | NA          | NA        | NA                 | NA          | NA           | NA      |
| chr2                    | 0                         | FAIL                   | NA          | NA        | NA                 | NA          | NA           | NA      |
| chr3                    | 0                         | FAIL                   | NA          | NA        | NA                 | NA          | NA           | NA      |
| chr4                    | 0                         | FAIL                   | NA          | NA        | NA                 | NA          | NA           | NA      |
| chr5                    | 0                         | FAIL                   | NA          | NA        | NA                 | NA          | NA           | NA      |
| chr6                    | 0                         | FAIL                   | NA          | NA        | NA                 | NA          | NA           | NA      |
| chr7:78166001-81085251  | 6                         | FAIL                   | FAIL        | FAIL      | PASS               | NA          | NA           | NA      |
| chr7:82205001-101583125 | 6                         | FAIL                   | FAIL        | PASS      | FAIL               | NA          | NA           | NA      |
| chr8                    | 0                         | FAIL                   | NA          | NA        | NA                 | NA          | NA           | NA      |
| chr9                    | 2                         | FAIL                   | NA          | NA        | NA                 | NA          | NA           | NA      |
| chr10                   | 0                         | FAIL                   | NA          | NA        | NA                 | NA          | NA           | NA      |
| chr11                   | 3                         | FAIL                   | NA          | NA        | NA                 | NA          | NA           | NA      |
| chr12                   | 1                         | FAIL                   | NA          | NA        | NA                 | NA          | NA           | NA      |
| chr13                   | 0                         | FAIL                   | NA          | NA        | NA                 | NA          | NA           | NA      |
| chr14                   | 0                         | FAIL                   | NA          | NA        | NA                 | NA          | NA           | NA      |
| chr15                   | 0                         | FAIL                   | NA          | NA        | NA                 | NA          | NA           | NA      |
| chr16                   | 0                         | FAIL                   | NA          | NA        | NA                 | NA          | NA           | NA      |
| chr17                   | 0                         | FAIL                   | NA          | NA        | NA                 | NA          | NA           | NA      |
| chr18                   | 0                         | FAIL                   | NA          | NA        | NA                 | NA          | NA           | NA      |
| chr19                   | 0                         | FAIL                   | NA          | NA        | NA                 | NA          | NA           | NA      |
| chr20                   | 0                         | FAIL                   | NA          | NA        | NA                 | NA          | NA           | NA      |
| chr21                   | 0                         | FAIL                   | NA          | NA        | NA                 | NA          | NA           | NA      |
| chr22                   | 1                         | FAIL                   | NA          | NA        | NA                 | NA          | NA           | NA      |
| chrX                    | 0                         | FAIL                   | NA          | NA        | NA                 | NA          | NA           | NA      |
| chrY                    | 0                         | FAIL                   | NA          | NA        | NA                 | NA          | NA           | NA      |

PCSI\_0465\_Pa\_P\_526

|                         | Total Pass: Chromosome(s) | Window ID with >= 8 SV | Window Join | Window AR | Window Oscillation | Window Type | Window Chain | Overall |
|-------------------------|---------------------------|------------------------|-------------|-----------|--------------------|-------------|--------------|---------|
| chr1                    | 0                         | FAIL                   | NA          | NA        | NA                 | NA          | NA           | NA      |
| chr2                    | 0                         | FAIL                   | NA          | NA        | NA                 | NA          | NA           | NA      |
| chr3                    | 0                         | FAIL                   | NA          | NA        | NA                 | NA          | NA           | NA      |
| chr4                    | 0                         | FAIL                   | NA          | NA        | NA                 | NA          | NA           | NA      |
| chr5                    | 0                         | FAIL                   | NA          | NA        | NA                 | NA          | NA           | NA      |
| chr6                    | 0                         | FAIL                   | NA          | NA        | NA                 | NA          | NA           | NA      |
| chr7                    | 0                         | FAIL                   | NA          | NA        | NA                 | NA          | NA           | NA      |
| chr8                    | 0                         | FAIL                   | NA          | NA        | NA                 | NA          | NA           | NA      |
| chr9                    | 0                         | FAIL                   | NA          | NA        | NA                 | NA          | NA           | NA      |
| chr10:52732989-53032137 | 0                         | FAIL                   | FAIL        | FAIL      | FAIL               | NA          | NA           | NA      |
| chr11                   | 0                         | FAIL                   | NA          | NA        | NA                 | NA          | NA           | NA      |
| chr12                   | 0                         | FAIL                   | NA          | NA        | NA                 | NA          | NA           | NA      |
| chr13                   | 0                         | FAIL                   | NA          | NA        | NA                 | NA          | NA           | NA      |
| chr14                   | 0                         | FAIL                   | NA          | NA        | NA                 | NA          | NA           | NA      |
| chr15                   | 0                         | FAIL                   | NA          | NA        | NA                 | NA          | NA           | NA      |
| chr16                   | 0                         | FAIL                   | NA          | NA        | NA                 | NA          | NA           | NA      |
| chr17                   | 0                         | FAIL                   | NA          | NA        | NA                 | NA          | NA           | NA      |
| chr18:2115199-5558802   | 1                         | FAIL                   | FAIL        | FAIL      | FAIL               | NA          | NA           | NA      |
| chr19                   | 0                         | FAIL                   | NA          | NA        | NA                 | NA          | NA           | NA      |
| chr20                   | 0                         | FAIL                   | NA          | NA        | NA                 | NA          | NA           | NA      |
| chr21                   | 0                         | FAIL                   | NA          | NA        | NA                 | NA          | NA           | NA      |
| chr22                   | 0                         | FAIL                   | NA          | NA        | NA                 | NA          | NA           | NA      |
| chrX                    | 0                         | FAIL                   | NA          | NA        | NA                 | NA          | NA           | NA      |
| chrY                    | 0                         | FAIL                   | NA          | NA        | NA                 | NA          | NA           | NA      |

PCSI\_0466\_Pa\_P\_526

|                          | Total Pass: Chromosome(s) | Window ID with >= 8 SV | Window Join | Window AR | Window Oscillation | Window Type | Window Chain | Overall |
|--------------------------|---------------------------|------------------------|-------------|-----------|--------------------|-------------|--------------|---------|
| chr1                     | 0                         | FAIL                   | NA          | NA        | NA                 | NA          | NA           | NA      |
| chr2                     | 0                         | FAIL                   | NA          | NA        | NA                 | NA          | NA           | NA      |
| chr3                     | 0                         | FAIL                   | NA          | NA        | NA                 | NA          | NA           | NA      |
| chr4:160108471-178301083 | 2                         | FAIL                   | FAIL        | FAIL      | FAIL               | NA          | NA           | NA      |
| chr5                     | 0                         | FAIL                   | NA          | NA        | NA                 | NA          | NA           | NA      |
| chr6                     | 2                         | FAIL                   | NA          | NA        | NA                 | NA          | NA           | NA      |
| chr7                     | 0                         | FAIL                   | NA          | NA        | NA                 | NA          | NA           | NA      |
| chr8                     | 0                         | FAIL                   | NA          | NA        | NA                 | NA          | NA           | NA      |
| chr9:35806799-104263432  | 5                         | PASS                   | PASS        | FAIL      | FAIL               | NA          | NA           | NA      |
| chr10                    | 3                         | FAIL                   | NA          | NA        | NA                 | NA          | NA           | NA      |
| chr11                    | 0                         | FAIL                   | NA          | NA        | NA                 | NA          | NA           | NA      |
| chr12                    | 0                         | FAIL                   | NA          | NA        | NA                 | NA          | NA           | NA      |
| chr13                    | 0                         | FAIL                   | NA          | NA        | NA                 | NA          | NA           | NA      |
| chr14                    | 0                         | FAIL                   | NA          | NA        | NA                 | NA          | NA           | NA      |
| chr15                    | 1                         | FAIL                   | NA          | NA        | NA                 | NA          | NA           | NA      |
| chr16                    | 0                         | FAIL                   | NA          | NA        | NA                 | NA          | NA           | NA      |
| chr17                    | 0                         | FAIL                   | NA          | NA        | NA                 | NA          | NA           | NA      |
| chr18:1123606-21490773   | 6                         | FAIL                   | PASS        | PASS      | FAIL               | inter       | NA           | NA      |
| chr19:41577001-41894000  | 4                         | FAIL                   | FAIL        | FAIL      | FAIL               | NA          | NA           | NA      |
| chr20                    | 0                         | FAIL                   | NA          | NA        | NA                 | NA          | NA           | NA      |
| chr21                    | 0                         | FAIL                   | NA          | NA        | NA                 | NA          | NA           | NA      |
| chr22                    | 0                         | FAIL                   | NA          | NA        | NA                 | NA          | NA           | NA      |
| chrX:37802056-88480181   | 2                         | FAIL                   | PASS        | FAIL      | FAIL               | inter       | NA           | NA      |
| chrY                     | 0                         | FAIL                   | NA          | NA        | NA                 | NA          | NA           | NA      |

PCSI\_0492\_Pa\_P\_526

|                         | Total Pass: Chromosome(s) | Window ID with >= 8 SV | Window Join | Window AR | Window Oscillation | Window Type | Window Chain | Overall |
|-------------------------|---------------------------|------------------------|-------------|-----------|--------------------|-------------|--------------|---------|
| chr1                    | 1                         | FAIL                   | NA          | NA        | NA                 | NA          | NA           | NA      |
| chr2                    | 2                         | FAIL                   | NA          | NA        | NA                 | NA          | NA           | NA      |
| chr3                    | 1                         | FAIL                   | NA          | NA        | NA                 | NA          | NA           | NA      |
| chr4:10891827-30046000  | 0                         | FAIL                   | FAIL        | FAIL      | FAIL               | NA          | NA           | NA      |
| chr5                    | 0                         | FAIL                   | NA          | NA        | NA                 | NA          | NA           | NA      |
| chr6                    | 0                         | FAIL                   | NA          | NA        | NA                 | NA          | NA           | NA      |
| chr7                    | 1                         | FAIL                   | NA          | NA        | NA                 | NA          | NA           | NA      |
| chr8                    | 0                         | FAIL                   | NA          | NA        | NA                 | NA          | NA           | NA      |
| chr9                    | 0                         | FAIL                   | NA          | NA        | NA                 | NA          | NA           | NA      |
| chr10                   | 0                         | FAIL                   | NA          | NA        | NA                 | NA          | NA           | NA      |
| chr11                   | 0                         | FAIL                   | NA          | NA        | NA                 | NA          | NA           | NA      |
| chr12                   | 0                         | FAIL                   | NA          | NA        | NA                 | NA          | NA           | NA      |
| chr13:19797155-27142000 | 4                         | FAIL                   | FAIL        | FAIL      | FAIL               | NA          | NA           | NA      |
| chr14                   | 0                         | FAIL                   | NA          | NA        | NA                 | NA          | NA           | NA      |
| chr15                   | 0                         | FAIL                   | NA          | NA        | NA                 | NA          | NA           | NA      |
| chr16                   | 1                         | FAIL                   | NA          | NA        | NA                 | NA          | NA           | NA      |
| chr17                   | 0                         | FAIL                   | NA          | NA        | NA                 | NA          | NA           | NA      |
| chr18                   | 0                         | FAIL                   | NA          | NA        | NA                 | NA          | NA           | NA      |
| chr19                   | 0                         | FAIL                   | NA          | NA        | NA                 | NA          | NA           | NA      |
| chr20                   | 0                         | FAIL                   | NA          | NA        | NA                 | NA          | NA           | NA      |
| chr21                   | 0                         | FAIL                   | NA          | NA        | NA                 | NA          | NA           | NA      |
| chr22                   | 0                         | FAIL                   | NA          | NA        | NA                 | NA          | NA           | NA      |
| chrX                    | 1                         | FAIL                   | NA          | NA        | NA                 | NA          | NA           | NA      |
| chrY                    | 0                         | FAIL                   | NA          | NA        | NA                 | NA          | NA           | NA      |

PCSI\_0547\_Pa\_P\_526

|                          | Total Pass: Chromosome(s) | Window ID with >= 8 SV | Window Join | Window AR | Window Oscillation | Window Type | Window Chain | Overall |
|--------------------------|---------------------------|------------------------|-------------|-----------|--------------------|-------------|--------------|---------|
| chr1                     | 3                         | FAIL                   | NA          | NA        | NA                 | NA          | NA           | NA      |
| chr2:115527233-194957983 | 1                         | FAIL                   | FAIL        | FAIL      | FAIL               | NA          | NA           | NA      |
| chr3                     | 3                         | FAIL                   | NA          | NA        | NA                 | NA          | NA           | NA      |
| chr4:107269496-123280135 | 1                         | FAIL                   | FAIL        | FAIL      | FAIL               | NA          | NA           | NA      |
| chr5:39462795-63247893   | 1                         | FAIL                   | FAIL        | FAIL      | FAIL               | inter       | NA           | NA      |
| chr6                     | 0                         | FAIL                   | NA          | NA        | NA                 | NA          | NA           | NA      |
| chr7                     | 1                         | FAIL                   | NA          | NA        | NA                 | NA          | NA           | NA      |
| chr8                     | 1                         | FAIL                   | NA          | NA        | NA                 | NA          | NA           | NA      |
| chr9                     | 1                         | FAIL                   | NA          | NA        | NA                 | NA          | NA           | NA      |
| chr10:25407823-102981000 | 1                         | FAIL                   | FAIL        | FAIL      | FAIL               | NA          | NA           | NA      |
| chr11                    | 1                         | FAIL                   | NA          | NA        | NA                 | NA          | NA           | NA      |
| chr12                    | 1                         | FAIL                   | NA          | NA        | NA                 | NA          | NA           | NA      |
| chr13                    | 1                         | FAIL                   | NA          | NA        | NA                 | NA          | NA           | NA      |
| chr14                    | 0                         | FAIL                   | NA          | NA        | NA                 | NA          | NA           | NA      |
| chr15:94880001-101086521 | 3                         | FAIL                   | FAIL        | FAIL      | FAIL               | NA          | NA           | NA      |
| chr16                    | 0                         | FAIL                   | NA          | NA        | NA                 | NA          | NA           | NA      |
| chr17                    | 0                         | FAIL                   | NA          | NA        | NA                 | NA          | NA           | NA      |
| chr18:305809098-63595000 | 0                         | FAIL                   | FAIL        | FAIL      | FAIL               | NA          | NA           | NA      |
| chr19                    | 1                         | FAIL                   | NA          | NA        | NA                 | NA          | NA           | NA      |
| chr20                    | 0                         | FAIL                   | NA          | NA        | NA                 | NA          | NA           | NA      |
| chr21                    | 0                         | FAIL                   | NA          | NA        | NA                 | NA          | NA           | NA      |
| chr22:25069016-46026945  | 0                         | FAIL                   | FAIL        | FAIL      | FAIL               | NA          | NA           | NA      |
| chrX                     | 0                         | FAIL                   | NA          | NA        | NA                 | NA          | NA           | NA      |
| chrY                     | 0                         | FAIL                   | NA          | NA        | NA                 | NA          | NA           | NA      |

# RAMP\_0007\_Pa\_P\_526

|                         | Total Pass:<br>Chromosome(s) | Window ID<br>with >= 8 SV | Window<br>Join | Window<br>AR | Window<br>Occlusion | Window<br>Type | Window<br>Chain                                     | Overall |
|-------------------------|------------------------------|---------------------------|----------------|--------------|---------------------|----------------|-----------------------------------------------------|---------|
| chr1                    | 0                            | FAIL                      | NA             | NA           | NA                  | NA             | NA                                                  | NA      |
| chr2                    | 0                            | FAIL                      | NA             | NA           | NA                  | NA             | NA                                                  | NA      |
| chr3:1626776-123596762  | 0                            | FAIL                      | FAIL           | FAIL         | FAIL                | NA             | NA                                                  | NA      |
| chr4                    | 0                            | FAIL                      | NA             | NA           | NA                  | NA             | NA                                                  | NA      |
| chr5                    | 0                            | FAIL                      | NA             | NA           | NA                  | NA             | NA                                                  | NA      |
| chr6                    | 0                            | FAIL                      | NA             | NA           | NA                  | NA             | NA                                                  | NA      |
| chr7                    | 0                            | FAIL                      | NA             | NA           | NA                  | NA             | NA                                                  | NA      |
| chr8                    | 1                            | FAIL                      | NA             | NA           | NA                  | NA             | NA                                                  | NA      |
| chr9:76461001-120839000 | 3                            | FAIL                      | FAIL           | PASS         | FAIL                | NA             | NA                                                  | NA      |
| chr10                   | 0                            | FAIL                      | NA             | NA           | NA                  | NA             | NA                                                  | NA      |
| chr11                   | 0                            | FAIL                      | NA             | NA           | NA                  | NA             | NA                                                  | NA      |
| chr12                   | 0                            | FAIL                      | NA             | NA           | NA                  | NA             | NA                                                  | NA      |
| chr13                   | 0                            | FAIL                      | NA             | NA           | NA                  | NA             | NA                                                  | NA      |
| chr14                   | 0                            | FAIL                      | NA             | NA           | NA                  | NA             | NA                                                  | NA      |
| chr15                   | 0                            | FAIL                      | NA             | NA           | NA                  | NA             | NA                                                  | NA      |
| chr16                   | 0                            | FAIL                      | NA             | NA           | NA                  | NA             | NA                                                  | NA      |
| chr17:21954561-70441215 | 0                            | FAIL                      | FAIL           | FAIL         | FAIL                | chain          | chr17:21954561-70441215,<br>chr18:20210001-26215405 | NA      |
| chr18:20210001-26215405 | 5                            | FAIL                      | PASS           | PASS         | FAIL                | chain          | chr17:21954561-70441215,<br>chr18:20210001-26215405 | NA      |
| chr19:14010844-14057522 | 2                            | FAIL                      | FAIL           | FAIL         | FAIL                | NA             | NA                                                  | NA      |
| chr19:14962992-19710000 | 2                            | FAIL                      | FAIL           | FAIL         | FAIL                | NA             | NA                                                  | NA      |
| chr20                   | 1                            | FAIL                      | NA             | NA           | NA                  | NA             | NA                                                  | NA      |
| chr21                   | 0                            | FAIL                      | NA             | NA           | NA                  | NA             | NA                                                  | NA      |
| chr22                   | 0                            | FAIL                      | NA             | NA           | NA                  | NA             | NA                                                  | NA      |
| chrX                    | 0                            | FAIL                      | NA             | NA           | NA                  | NA             | NA                                                  | NA      |
| chrY                    | 0                            | FAIL                      | NA             | NA           | NA                  | NA             | NA                                                  | NA      |



S:0.962, PLOIDY:2.108, %N:0.27, %T1:0.73

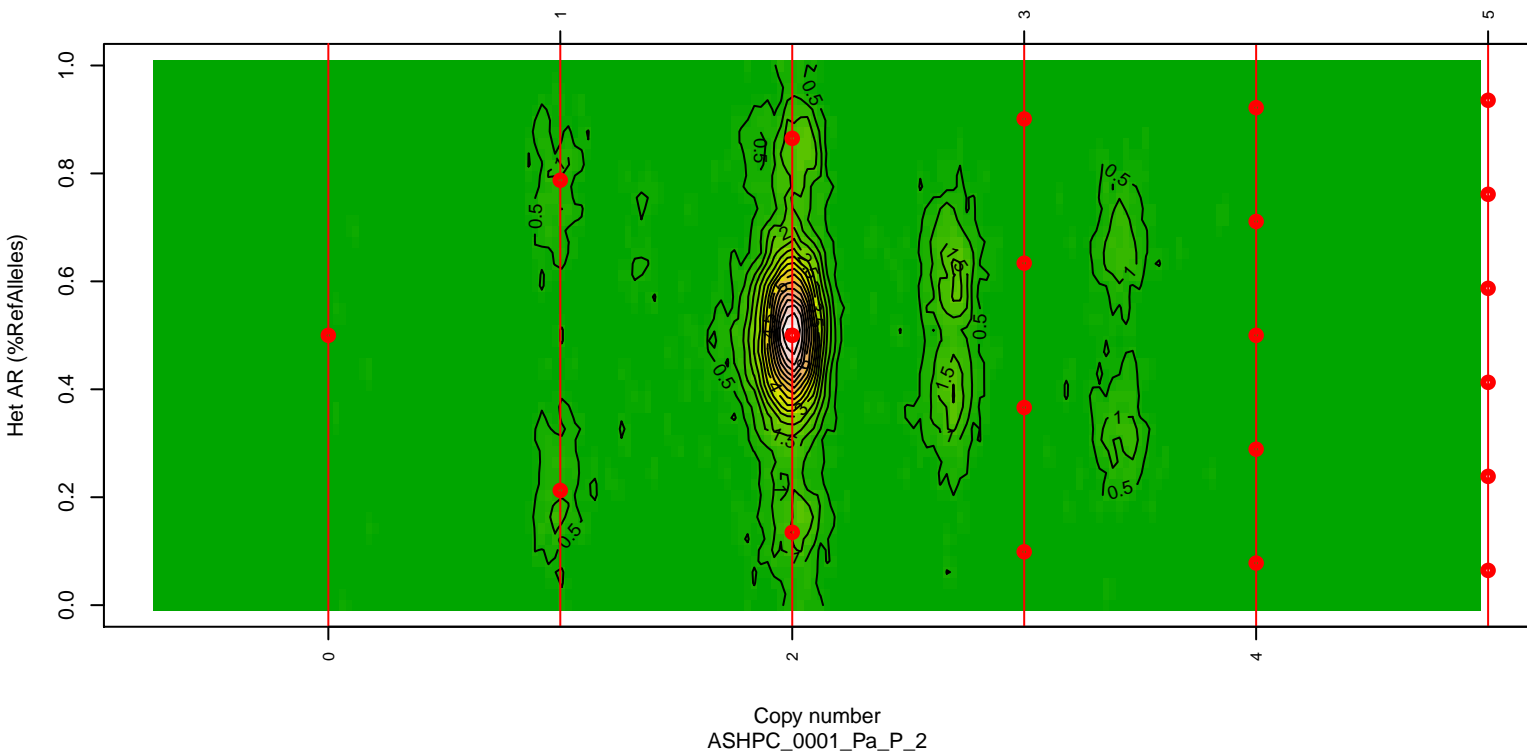

S:0.633, PLOIDY:3.214, %N:0.047, %T1:0.953

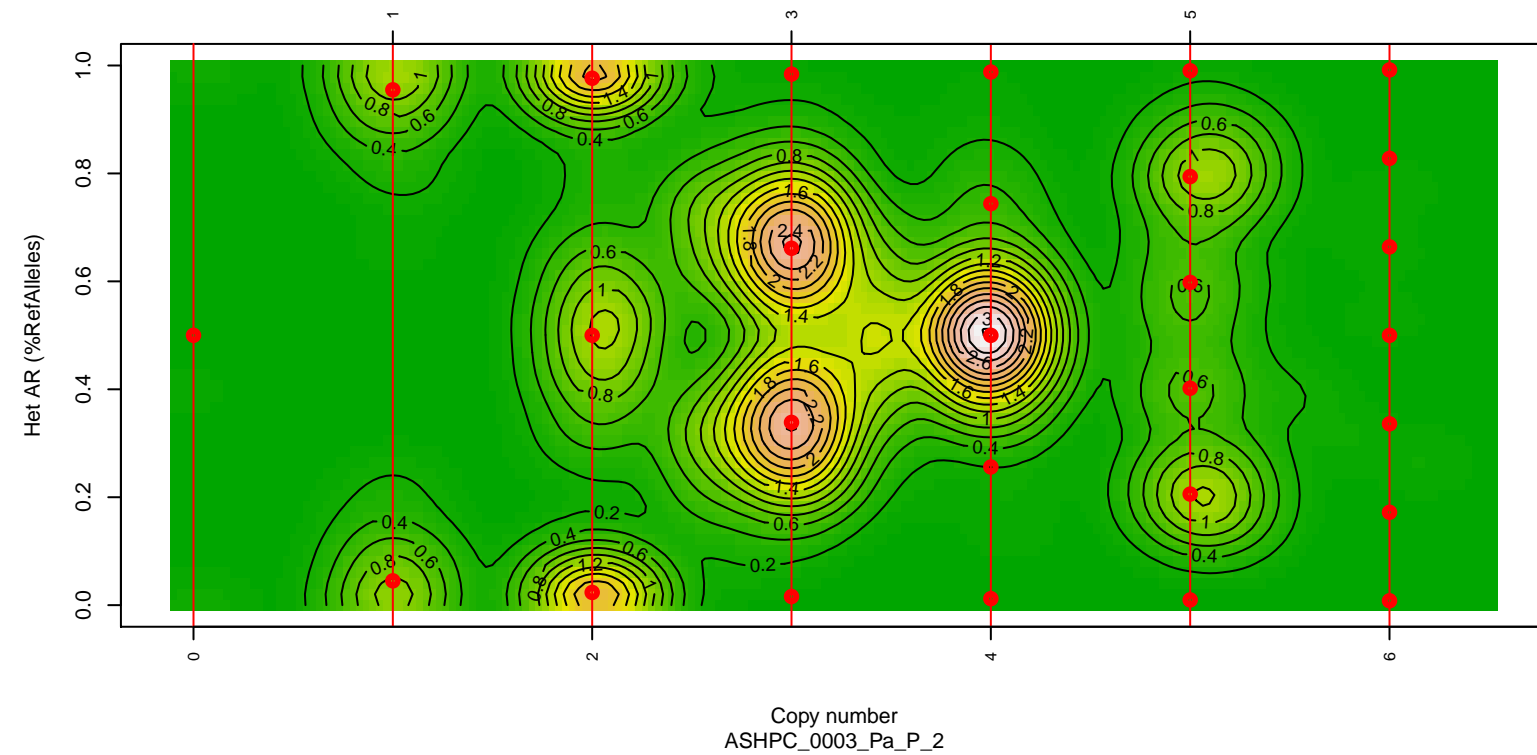

S:0.597, PLOIDY:3.36, %N:0.006, %T1:0.994

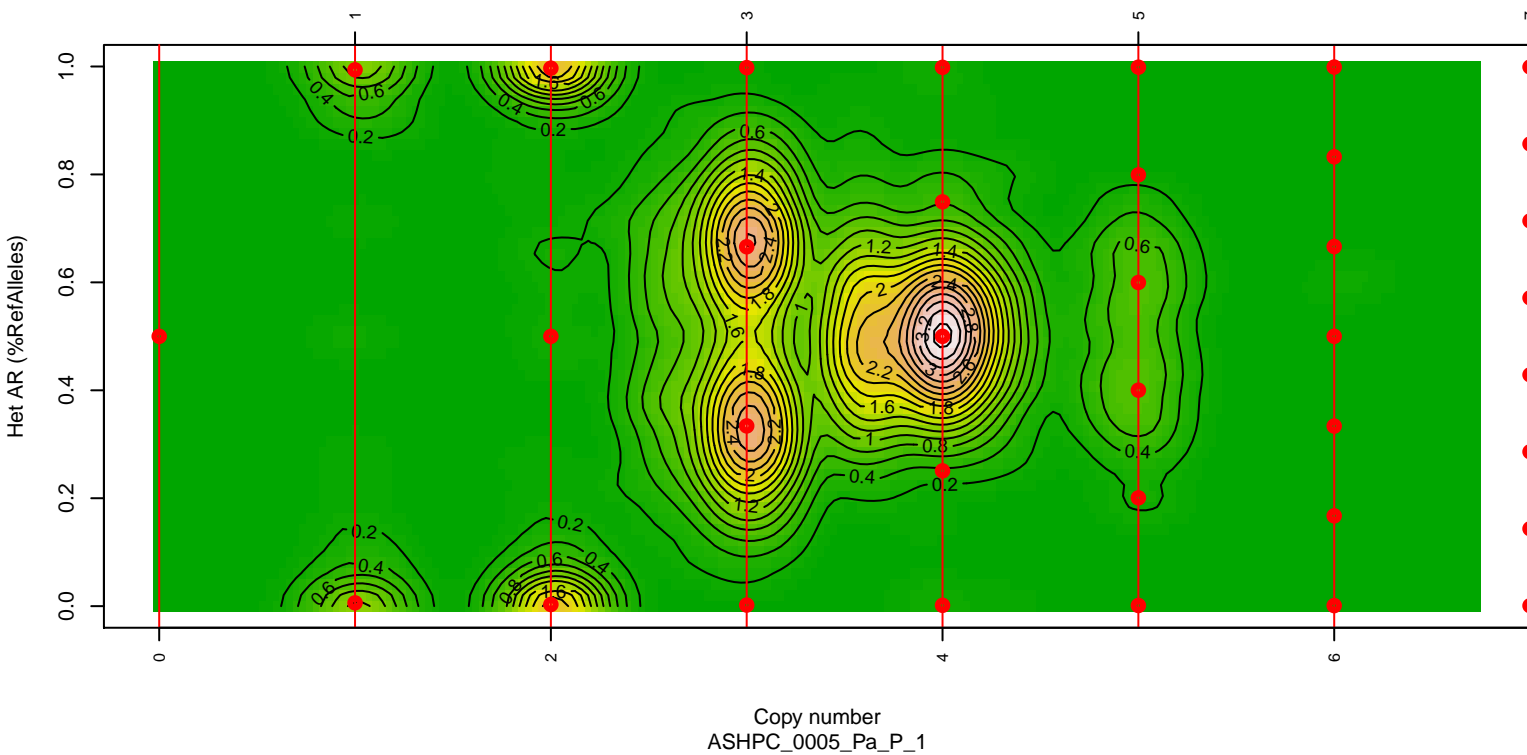

S:0.764, PLOIDY:2.773, %N:0.201, %T1:0.799

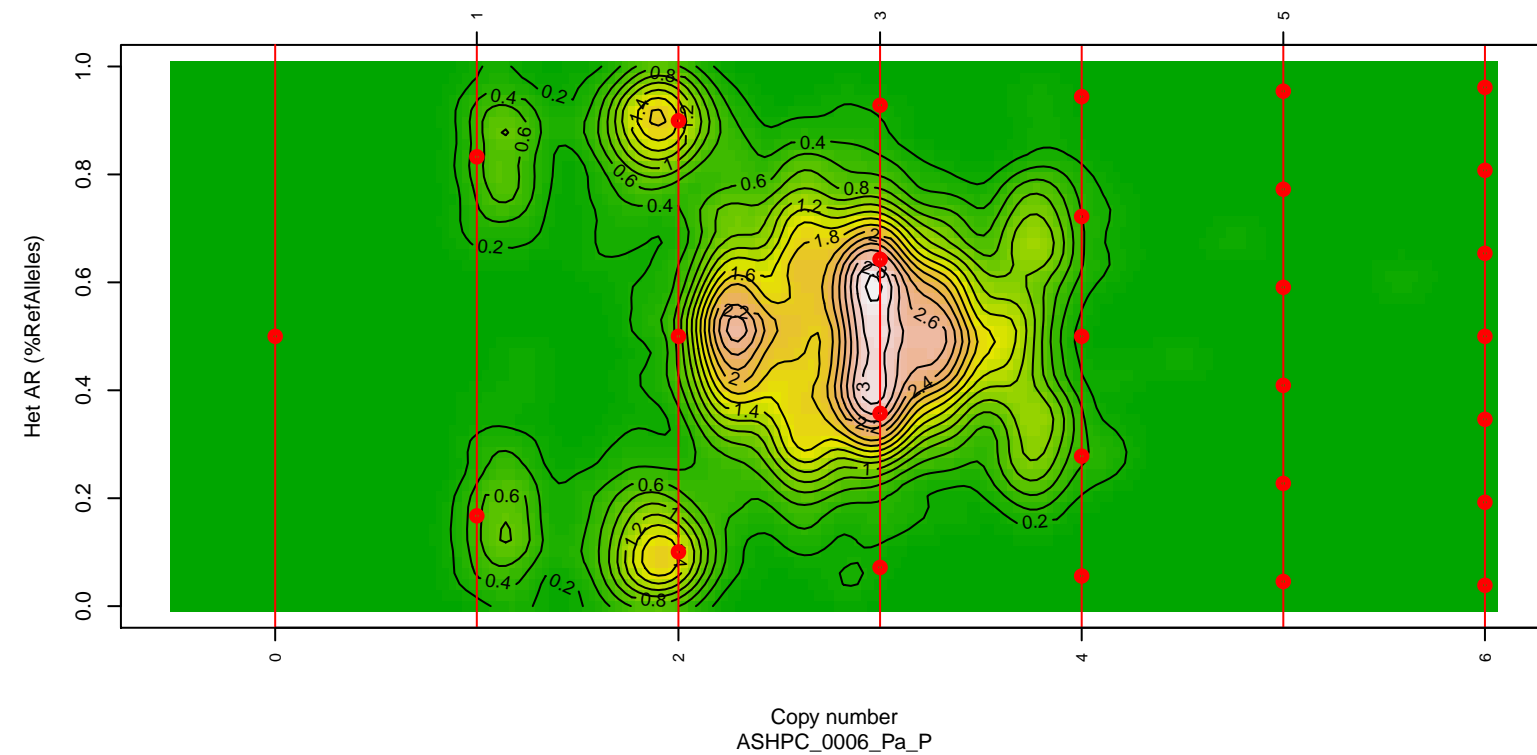

S:0.354, PLOIDY:6.185, %N:0.128, %T1:0.872

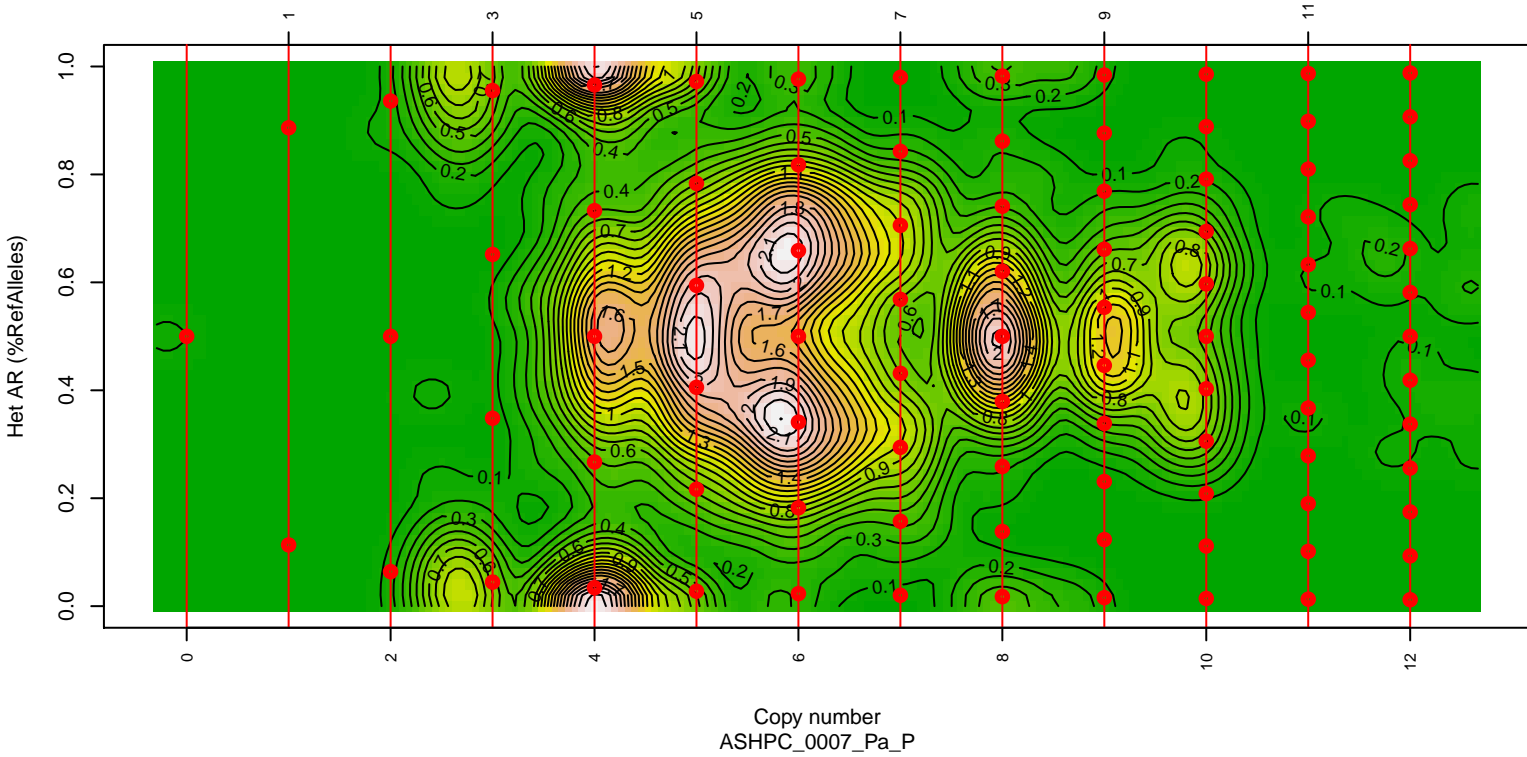

S:1.015, PLOIDY:1.967, %N:0.089, %T1:0.911

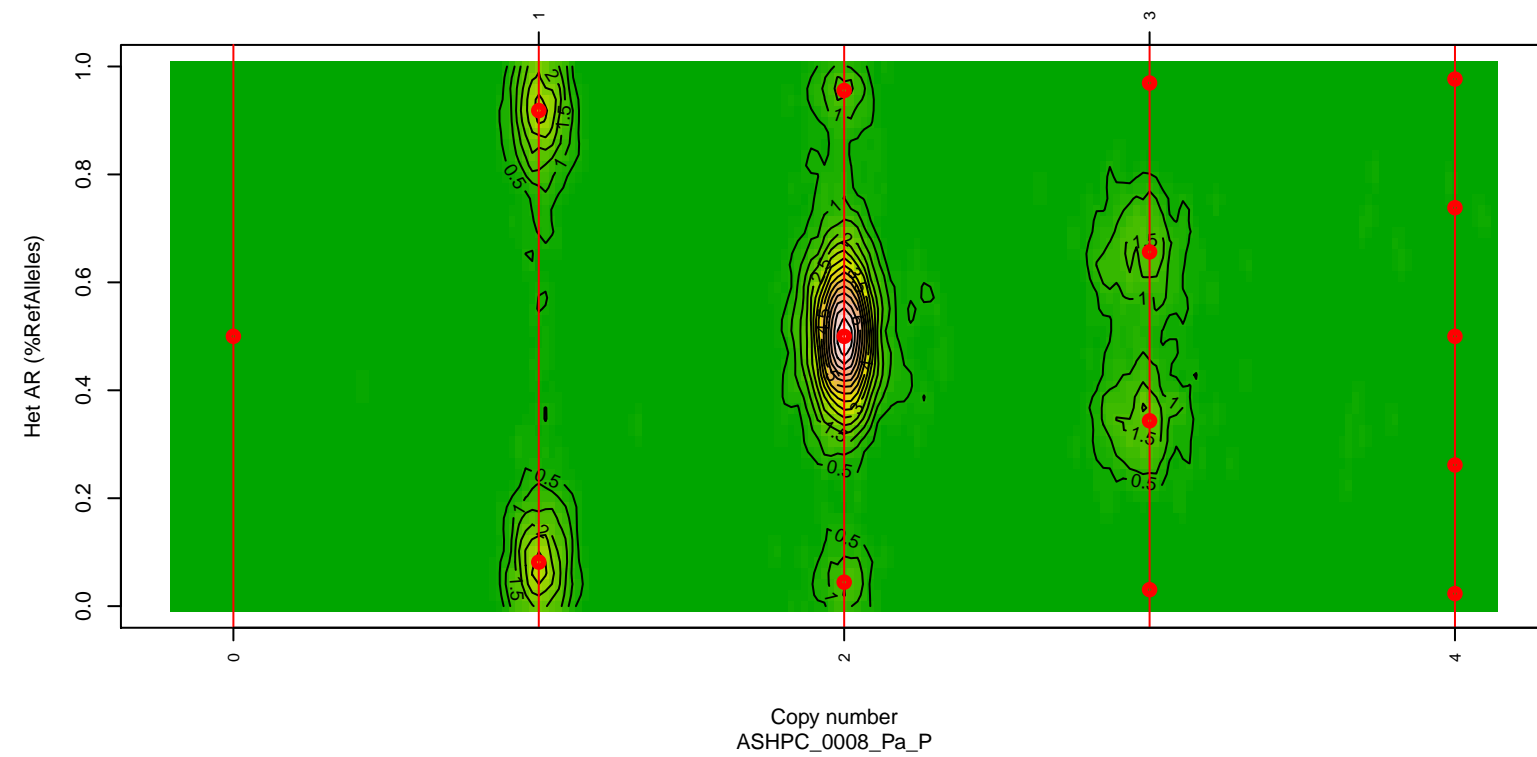

S:0.537, PLOIDY:3.761, %N:0.023, %T1:0.977

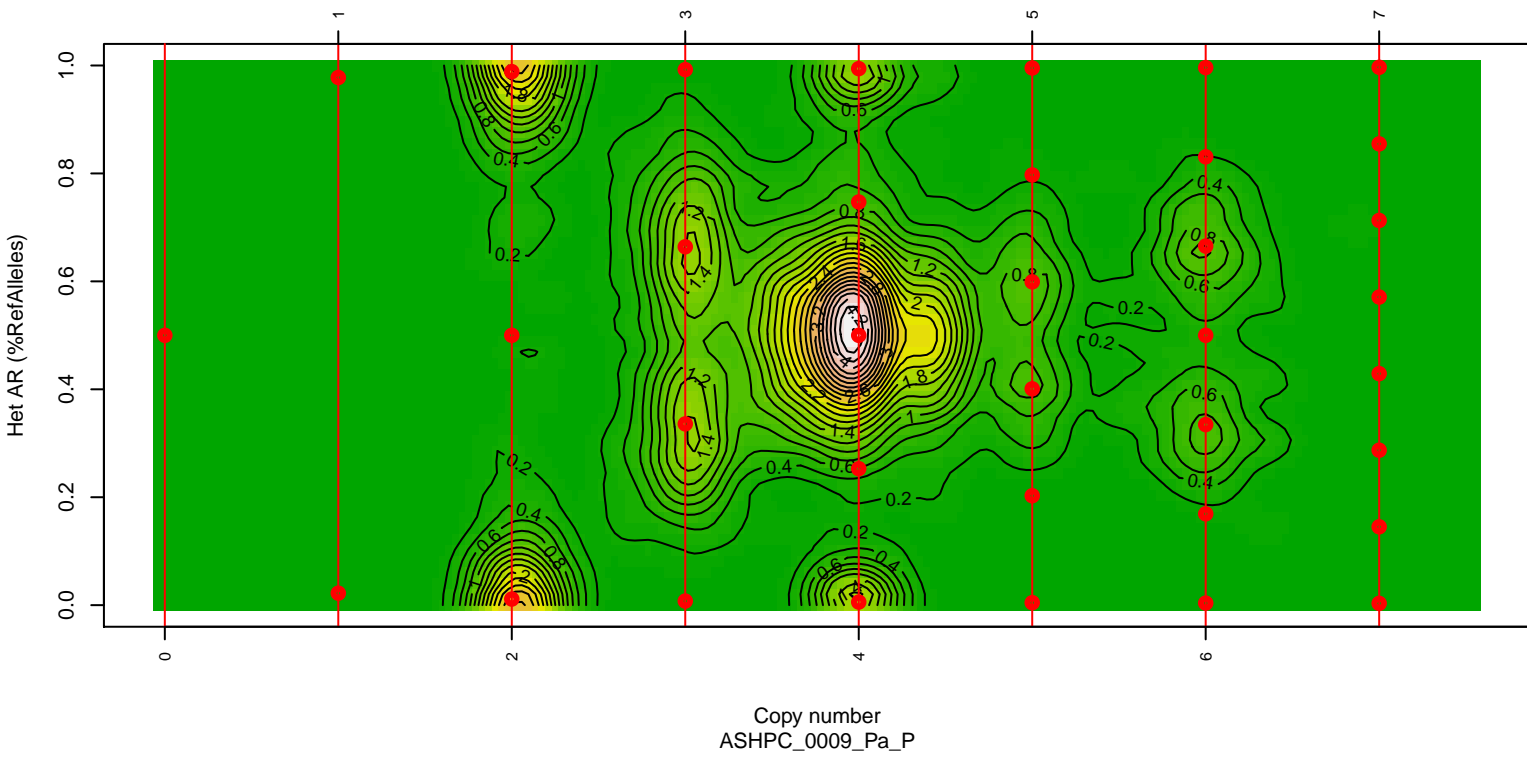

S:1.024, PLOIDY:1.943, %N:0.164, %T1:0.836

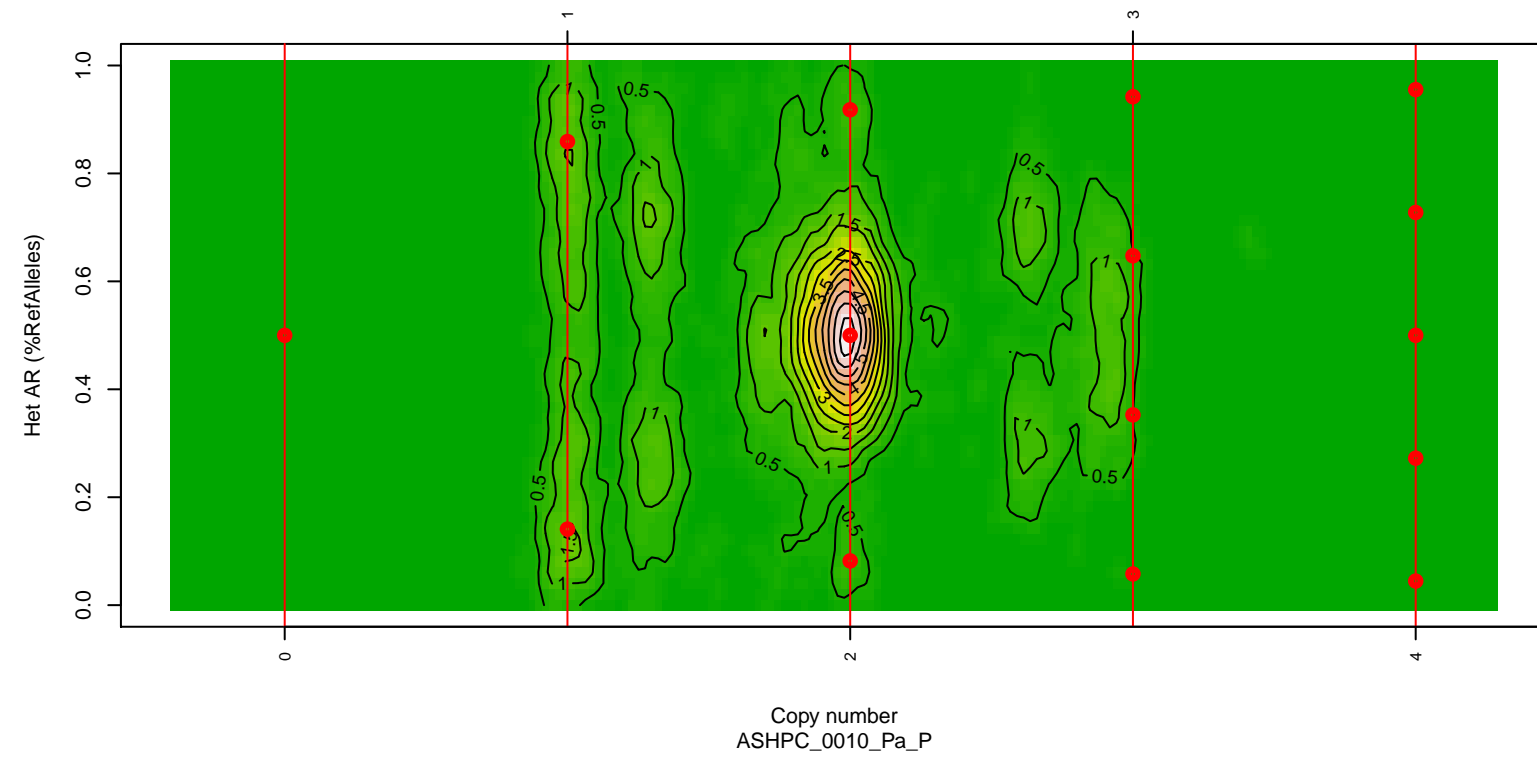

S:1.023, PLOIDY:1.955, %N:0.006, %T1:0.994

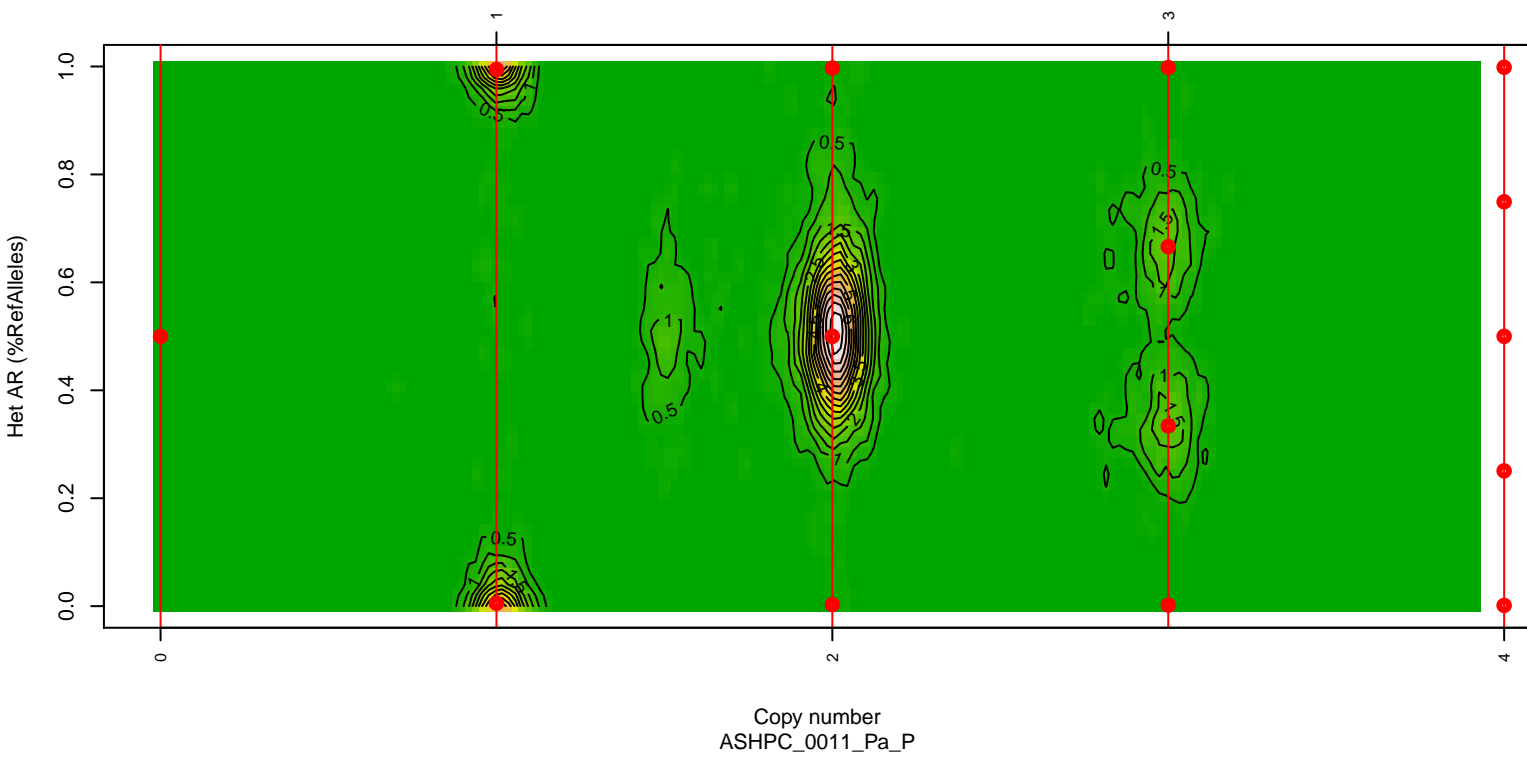

S:0.954, PLOIDY:2.127, %N:0.242, %T1:0.758

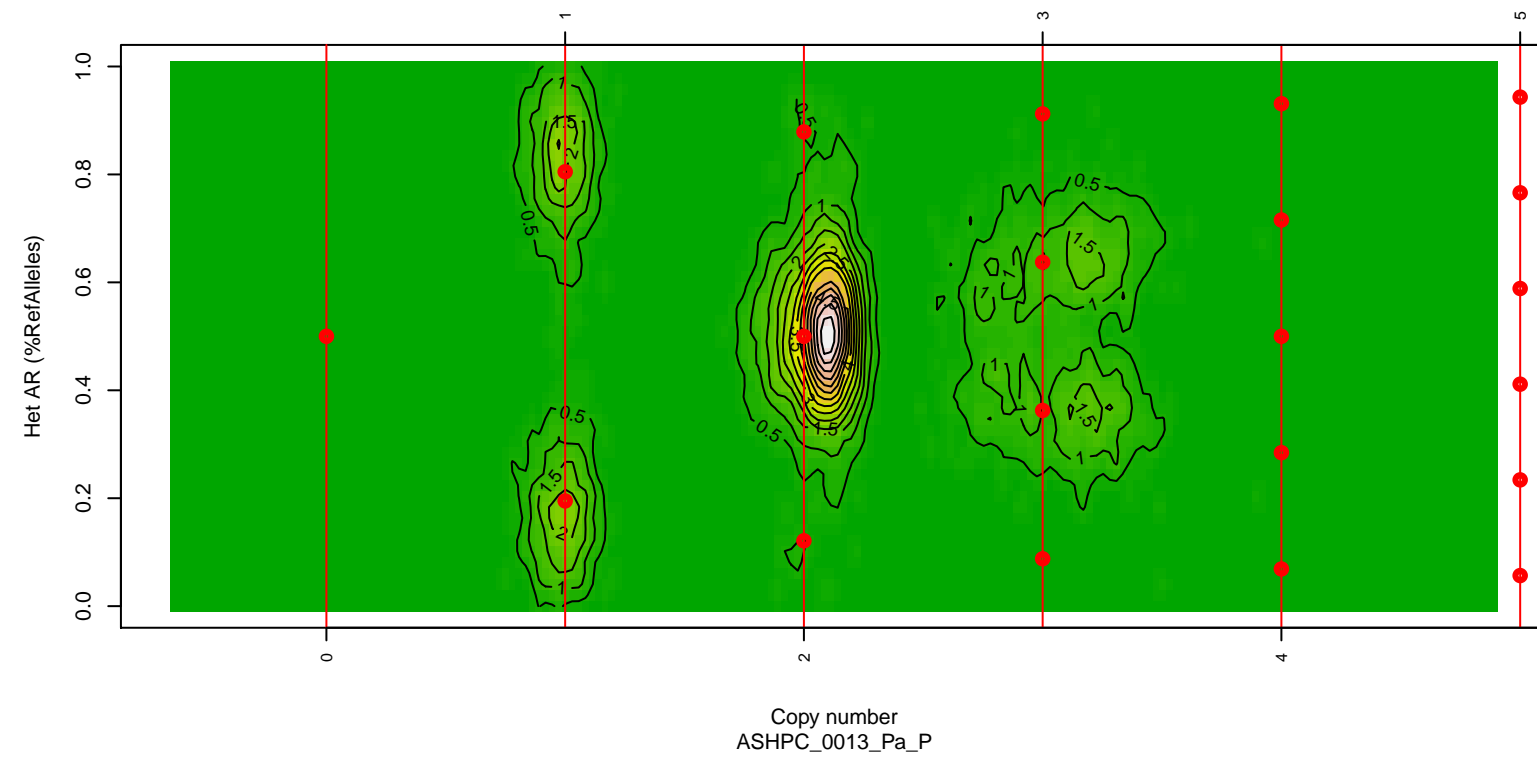

S:0.434, PLOIDY:5.573, %N:0.27, %T1:0.73

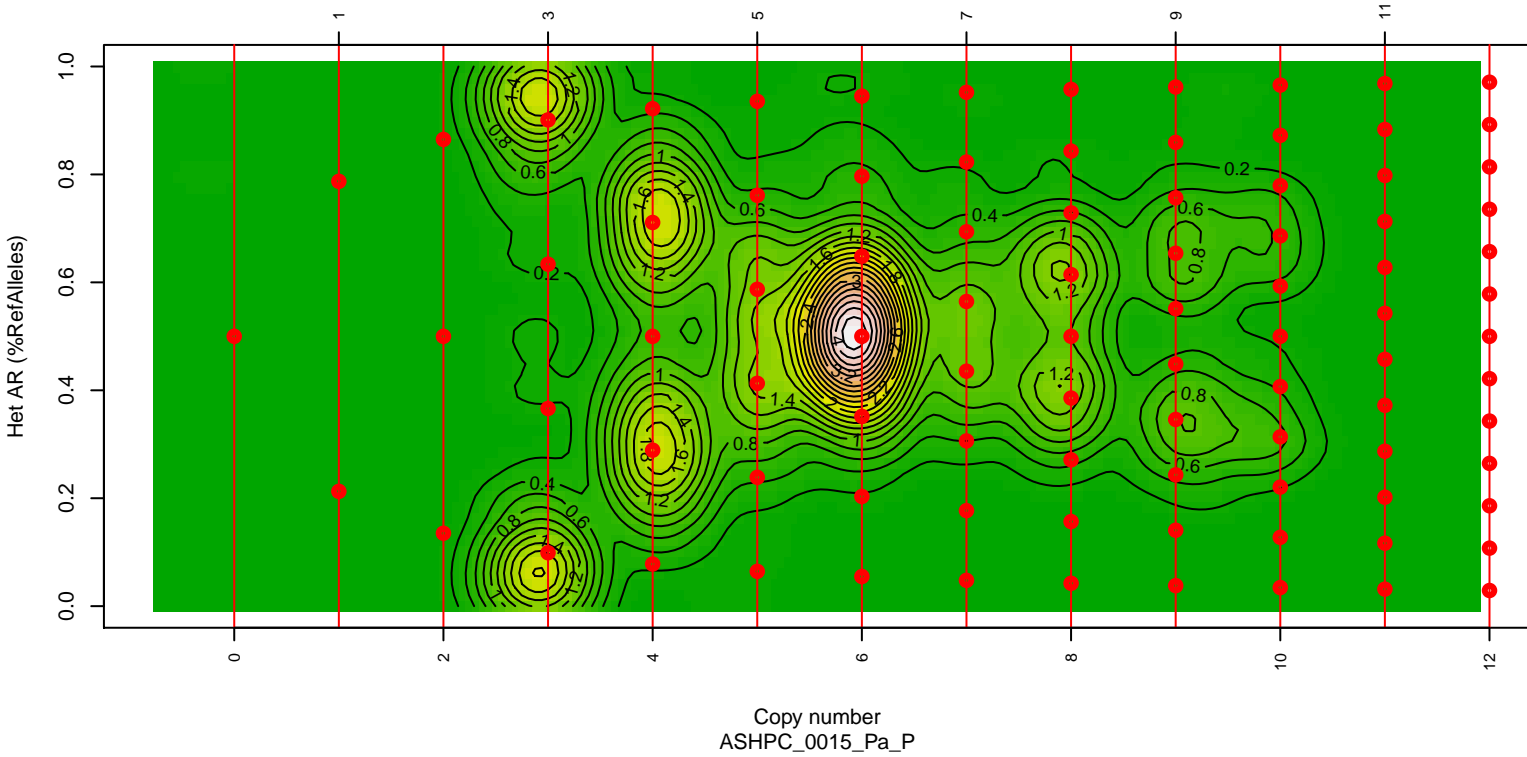

S:0.601, PLOIDY:3.869, %N:0.29, %T1:0.71

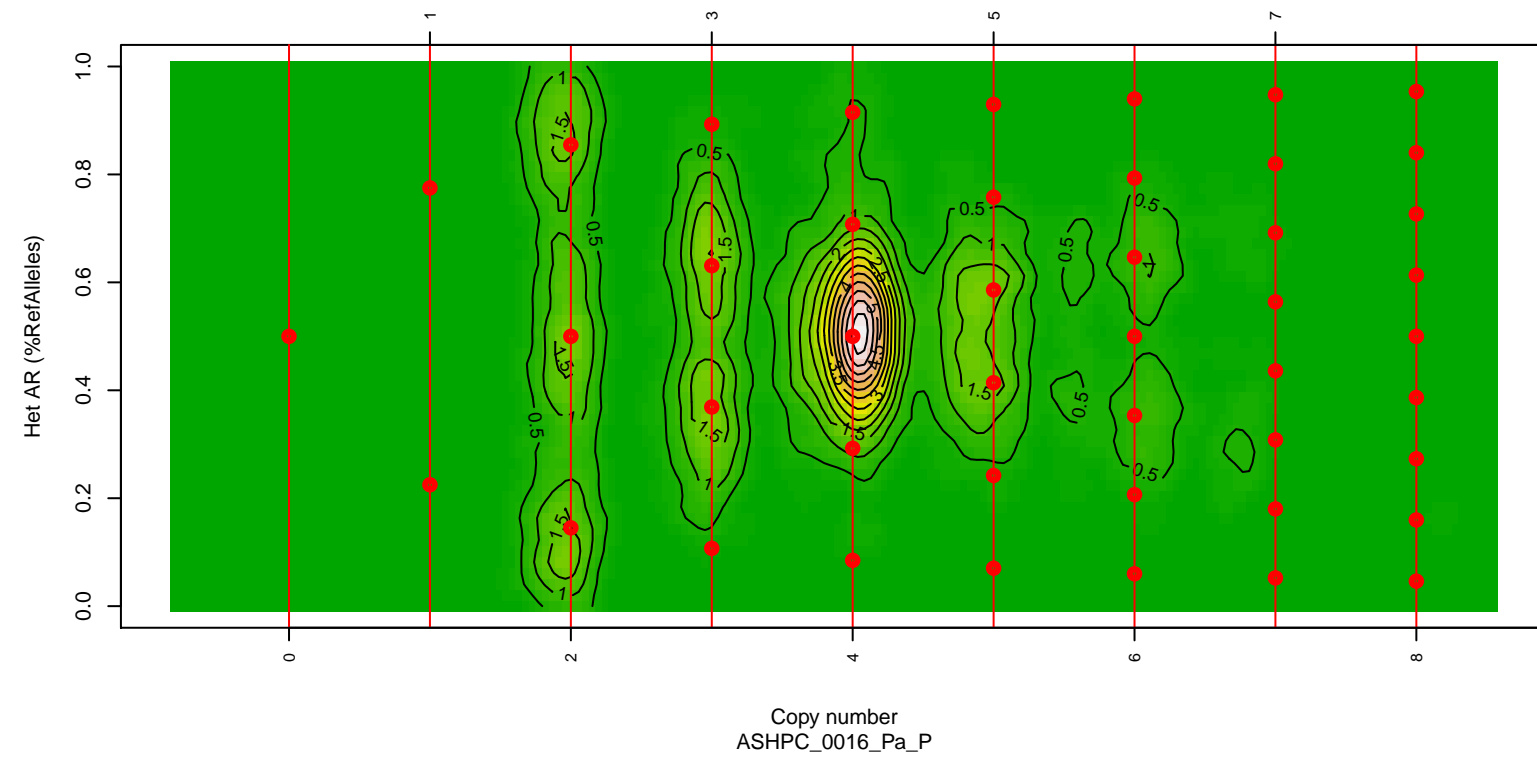

S:1.022, PLOIDY:1.951, %N:0.114, %T1:0.886

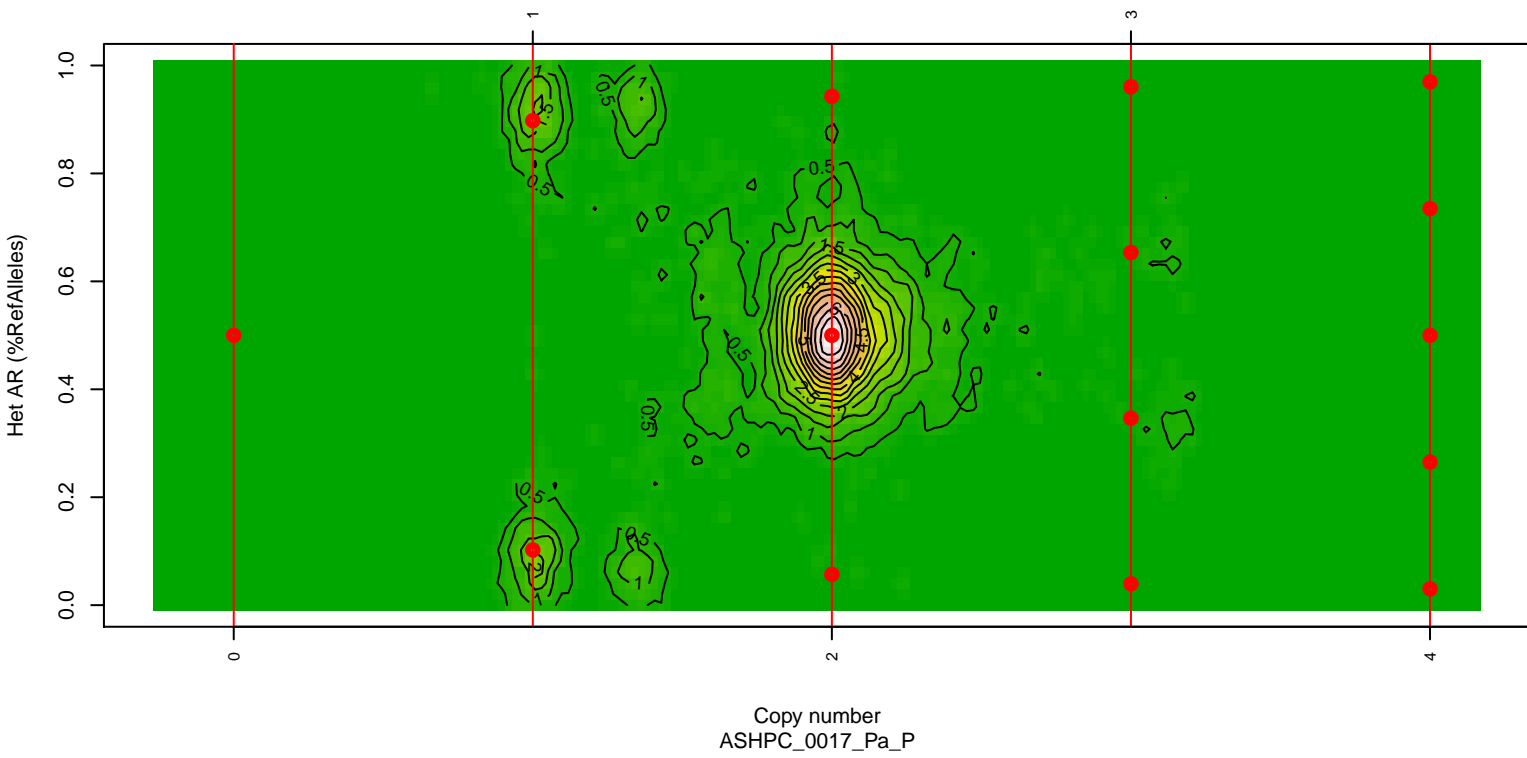

S:1.007, PLOIDY:1.985, %N:0.006, %T1:0.994

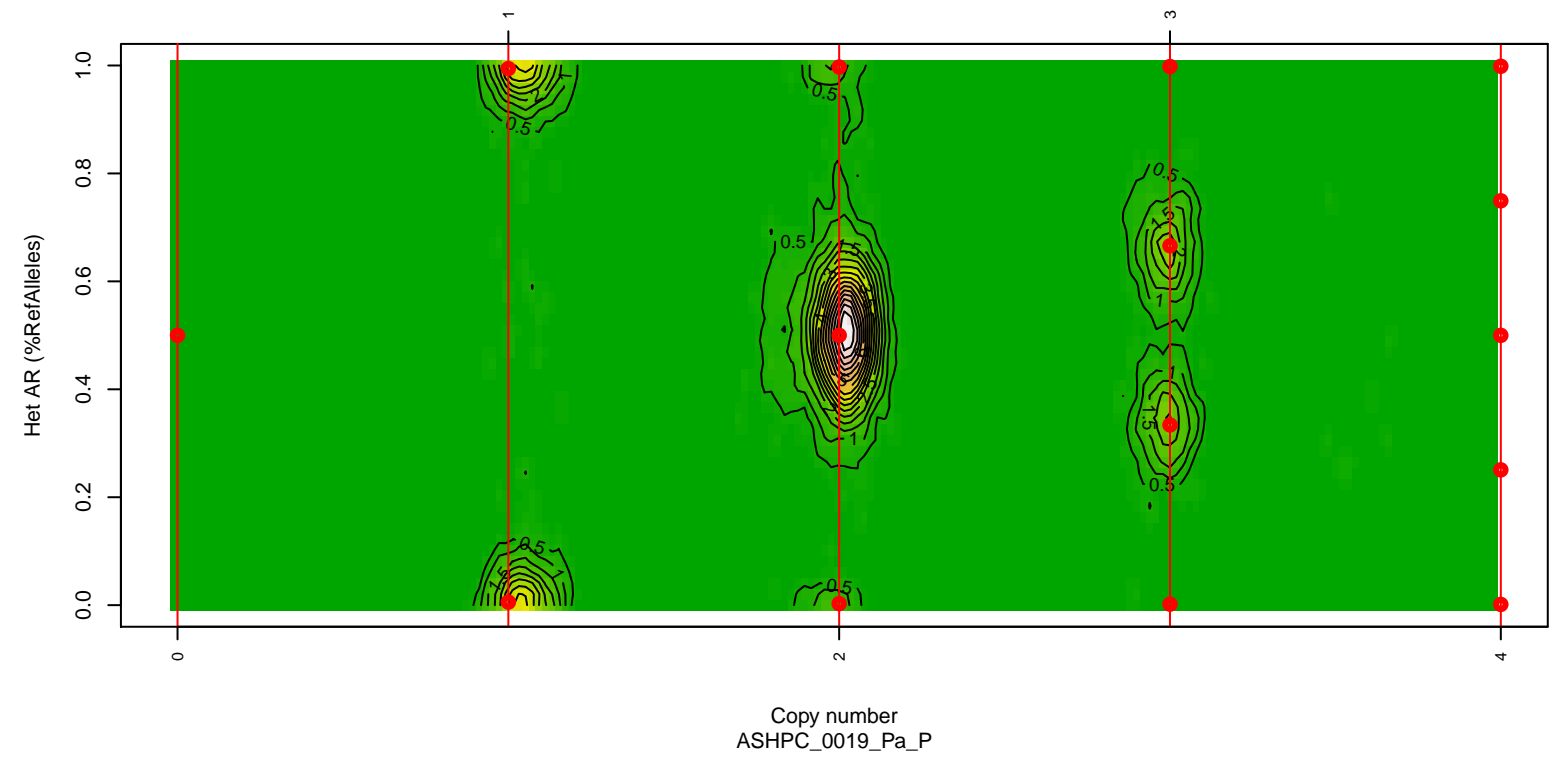

S:1.106, PLOIDY:1.798, %N:0.053, %T1:0.947

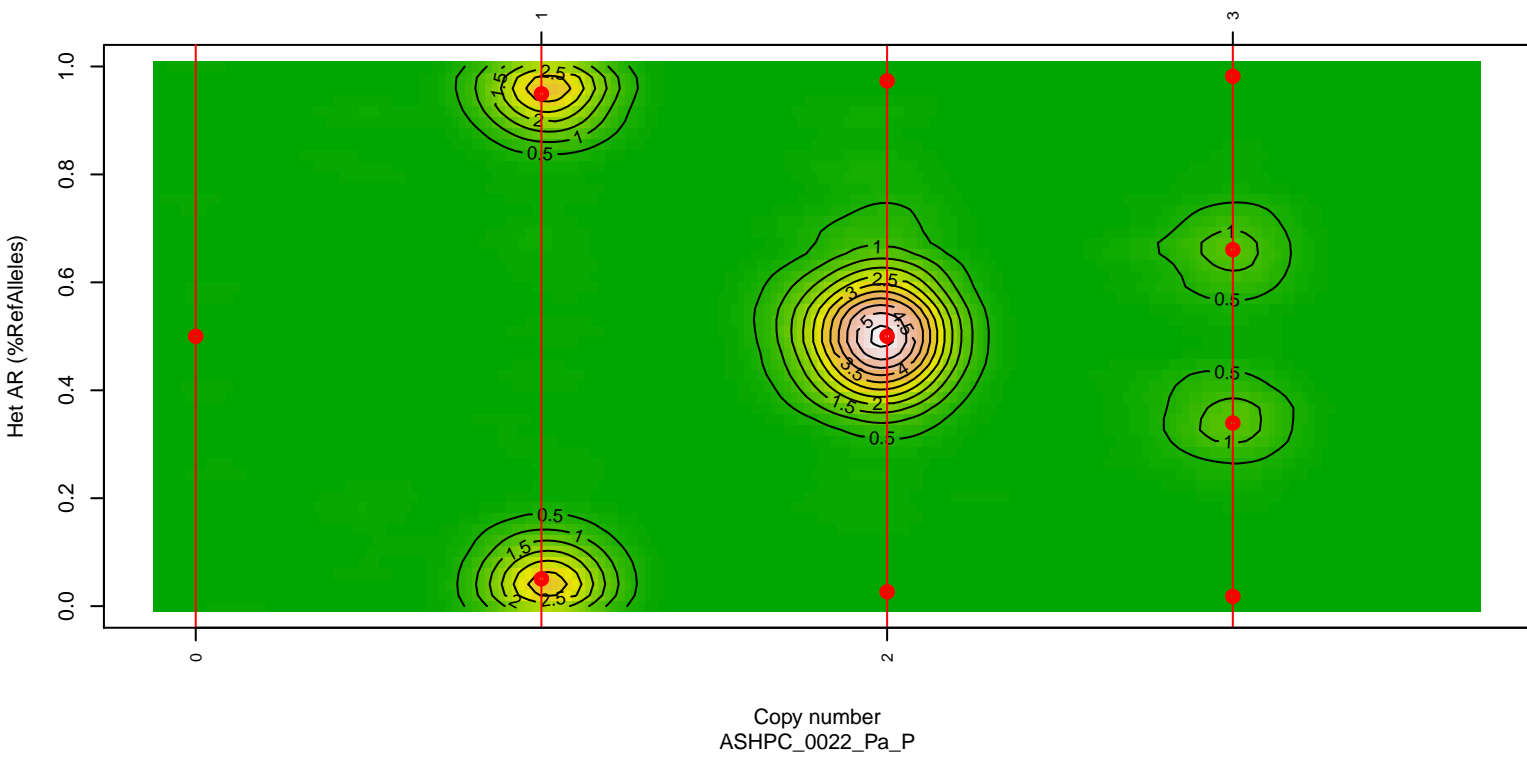

S:1.038, PLOIDY:1.922, %N:0.046, %T1:0.954

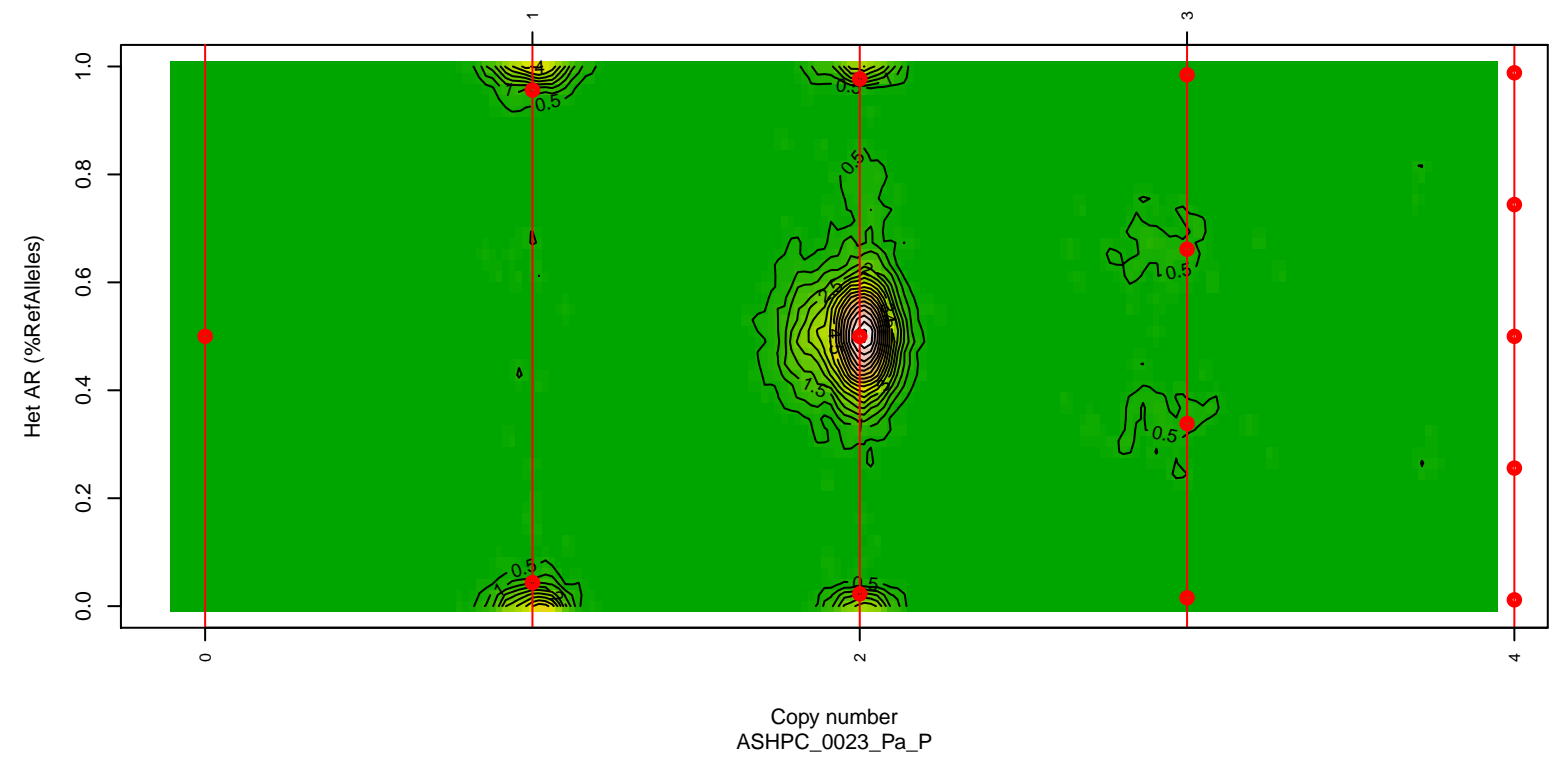

S:1.036, PLOIDY:1.929, %N:0.01, %T1:0.99

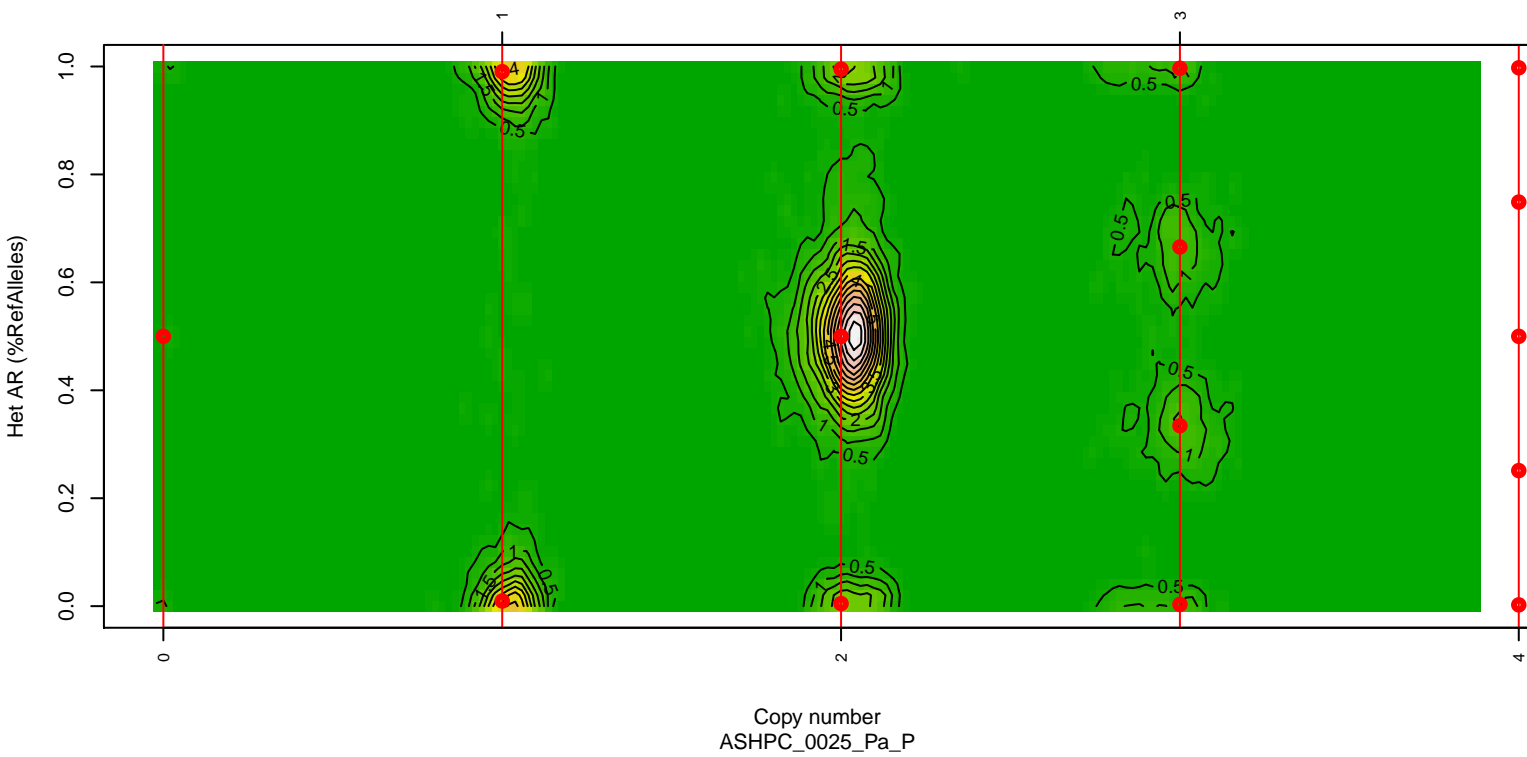

S:0.598, PLOIDY:3.615, %N:0.168, %T1:0.832

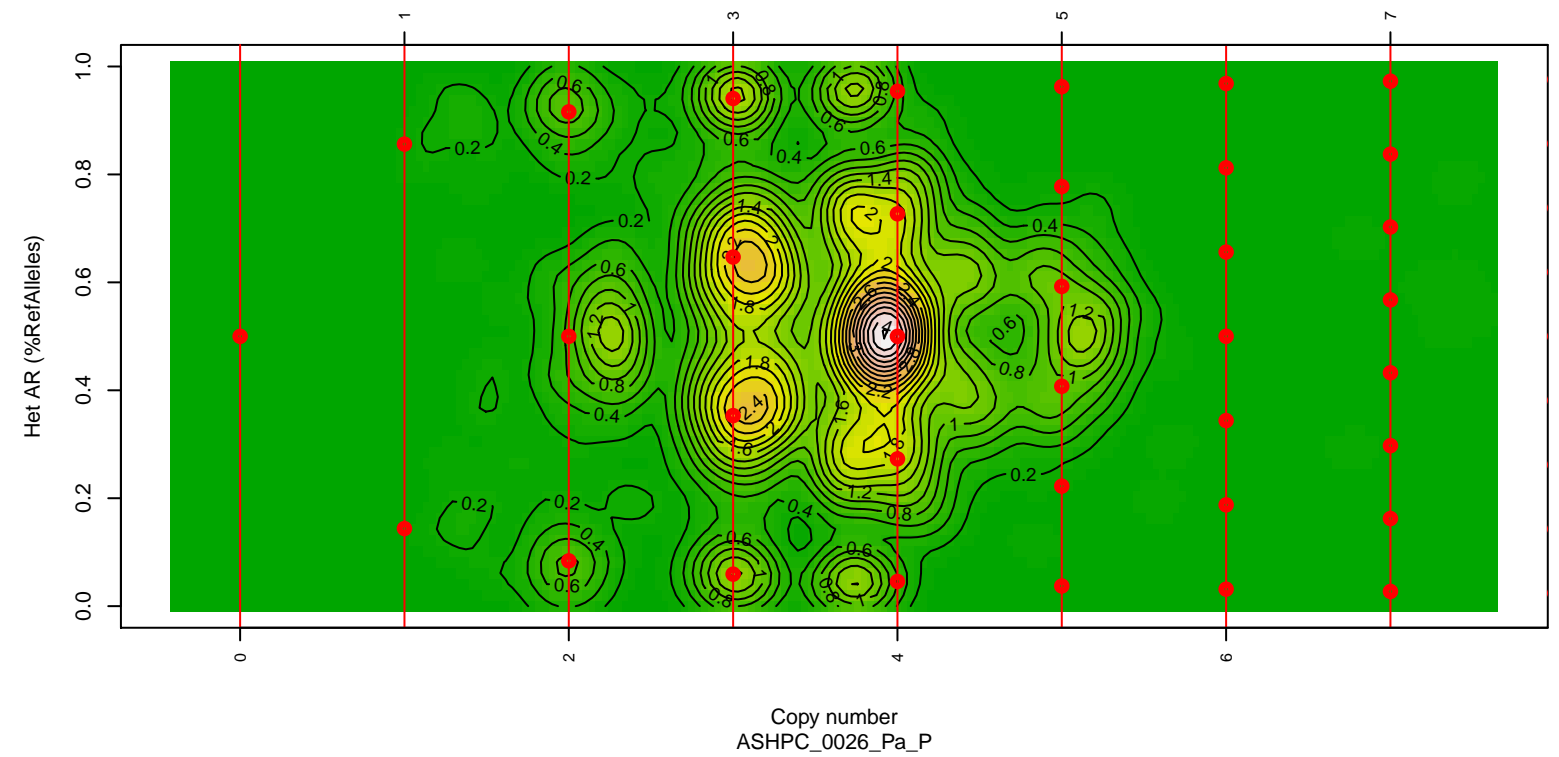



S:0.511, PLOIDY:3.917, %N:0.001, %T1:0.999

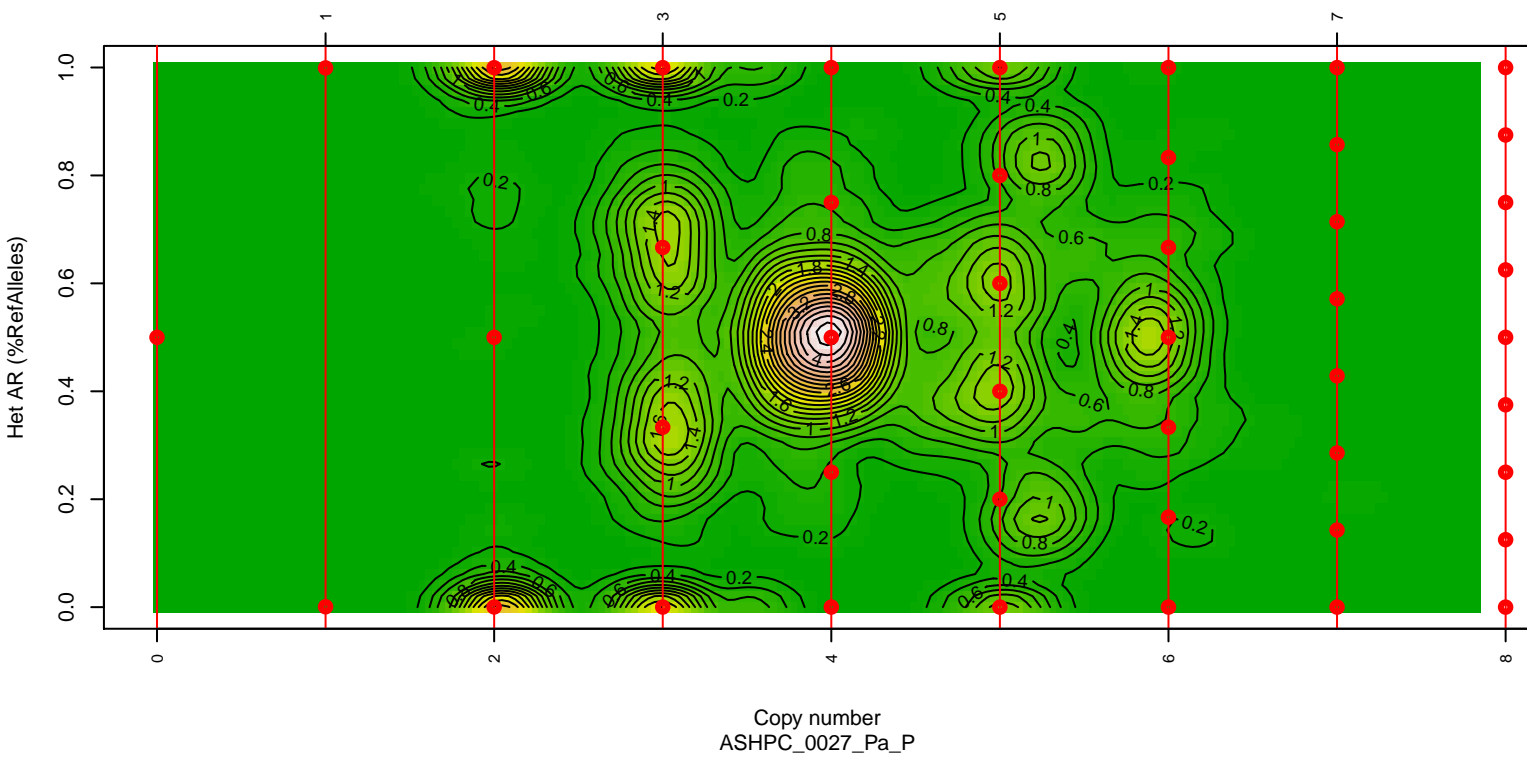

Copy number  
ASHPC\_0027\_Pa\_P

S:1.116, PLOIDY:1.732, %N:0.226, %T1:0.774

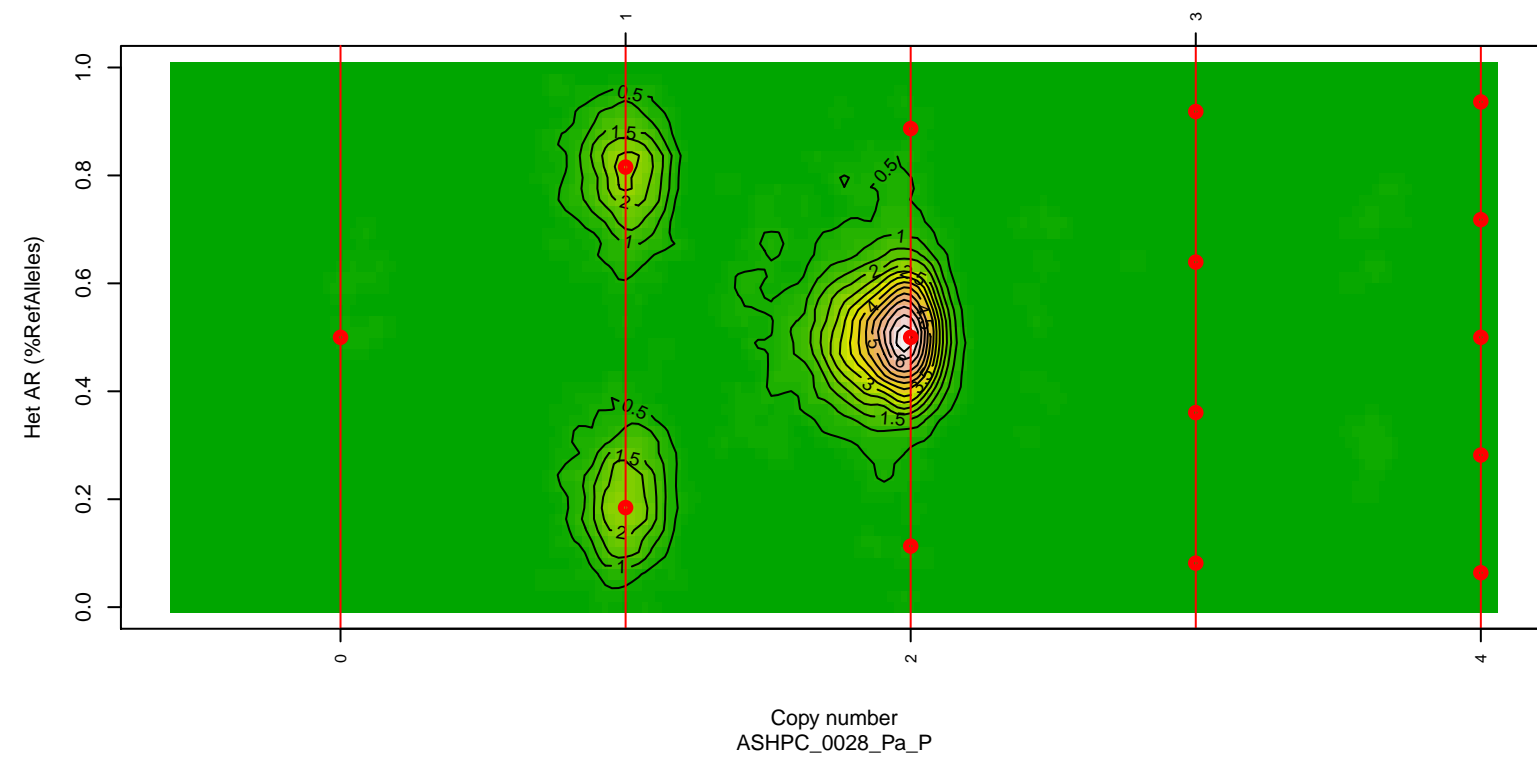

Copy number  
ASHPC\_0028\_Pa\_P

S:1.112, PLOIDY:1.787, %N:0.053, %T1:0.947

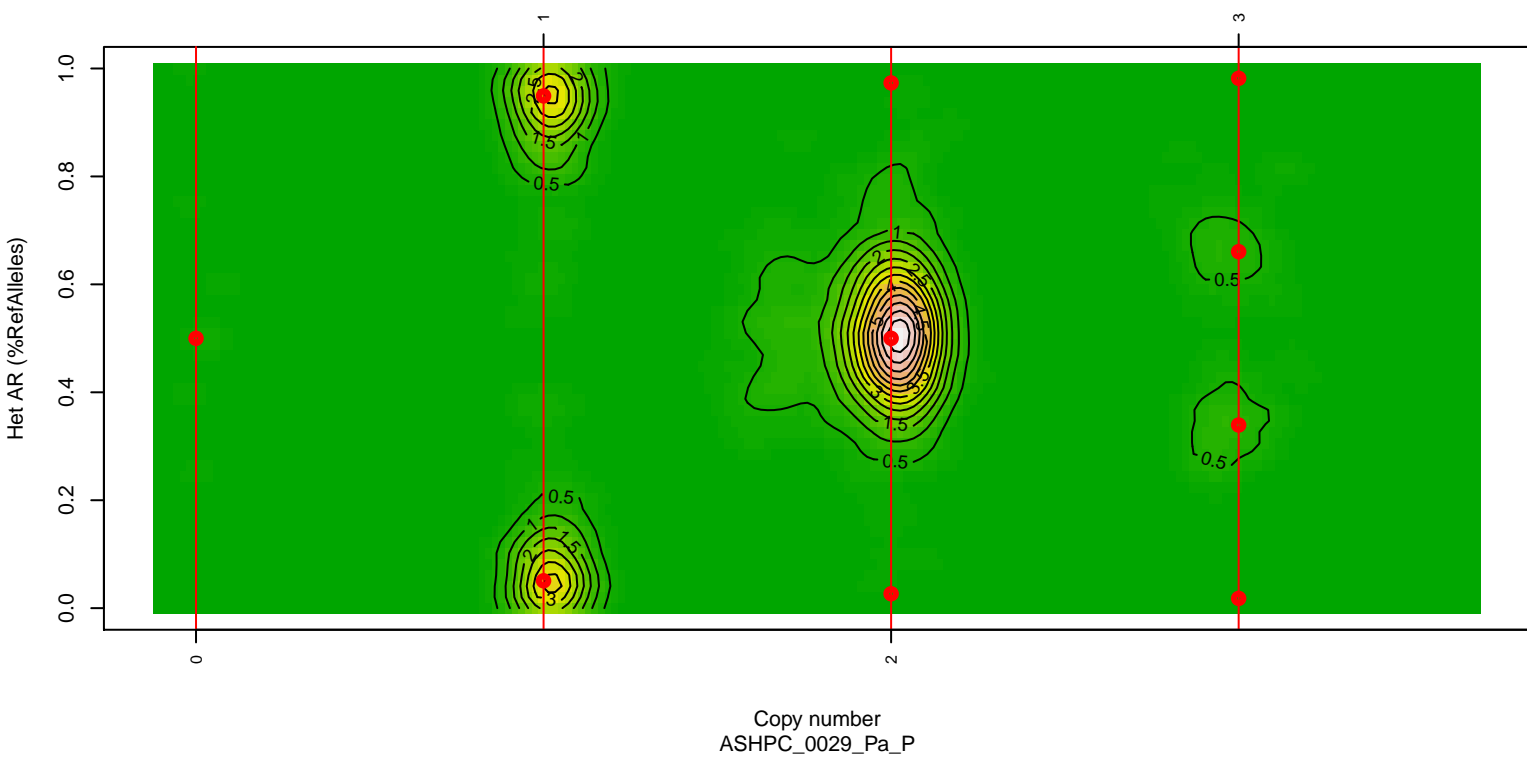

Copy number  
ASHPC\_0029\_Pa\_P

S:0.434, PLOIDY:4.927, %N:0.109, %T1:0.891

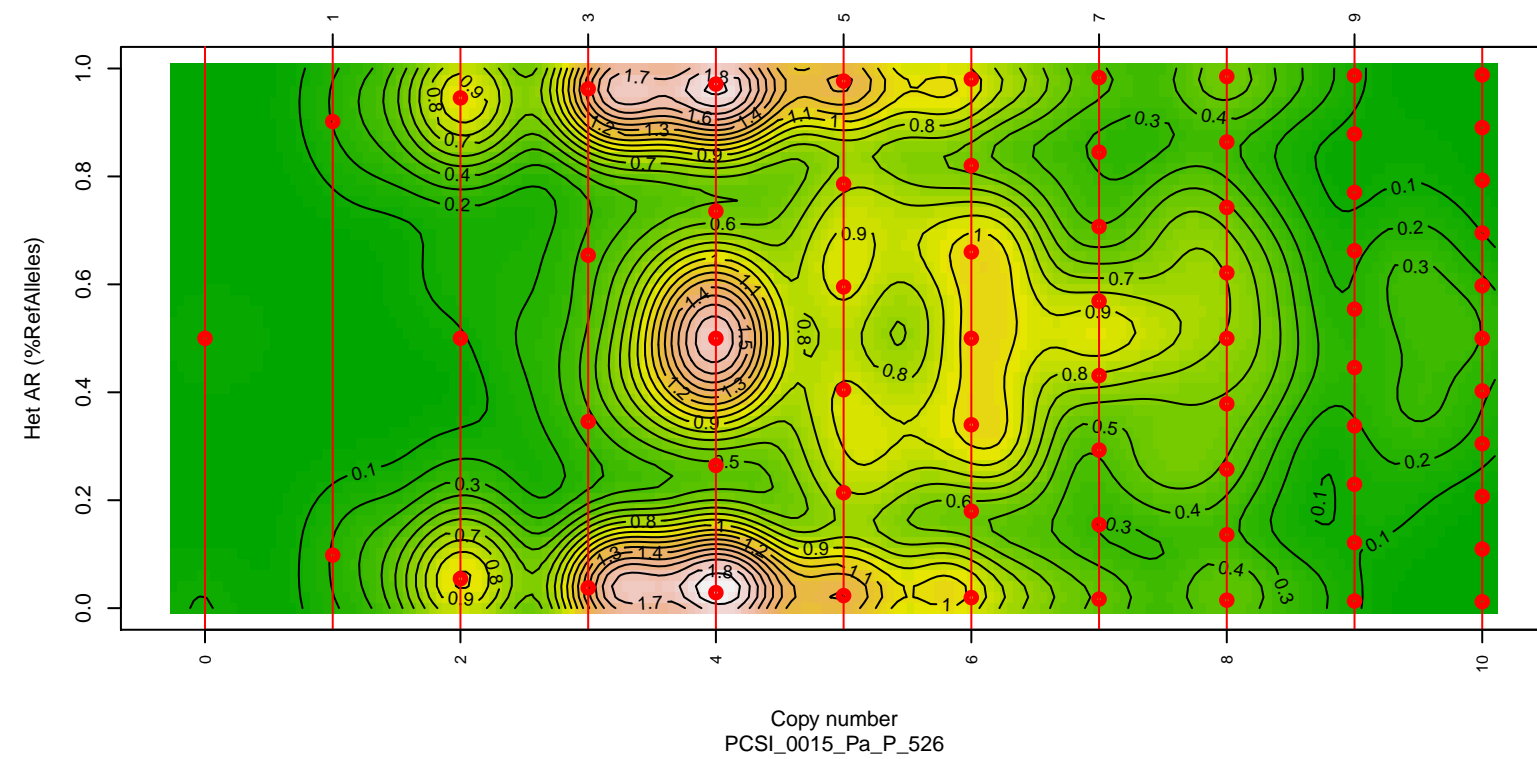

Copy number  
PCSI\_0015\_Pa\_P\_526

S:1.058, PLOIDY:1.847, %N:0.283, %T1:0.717

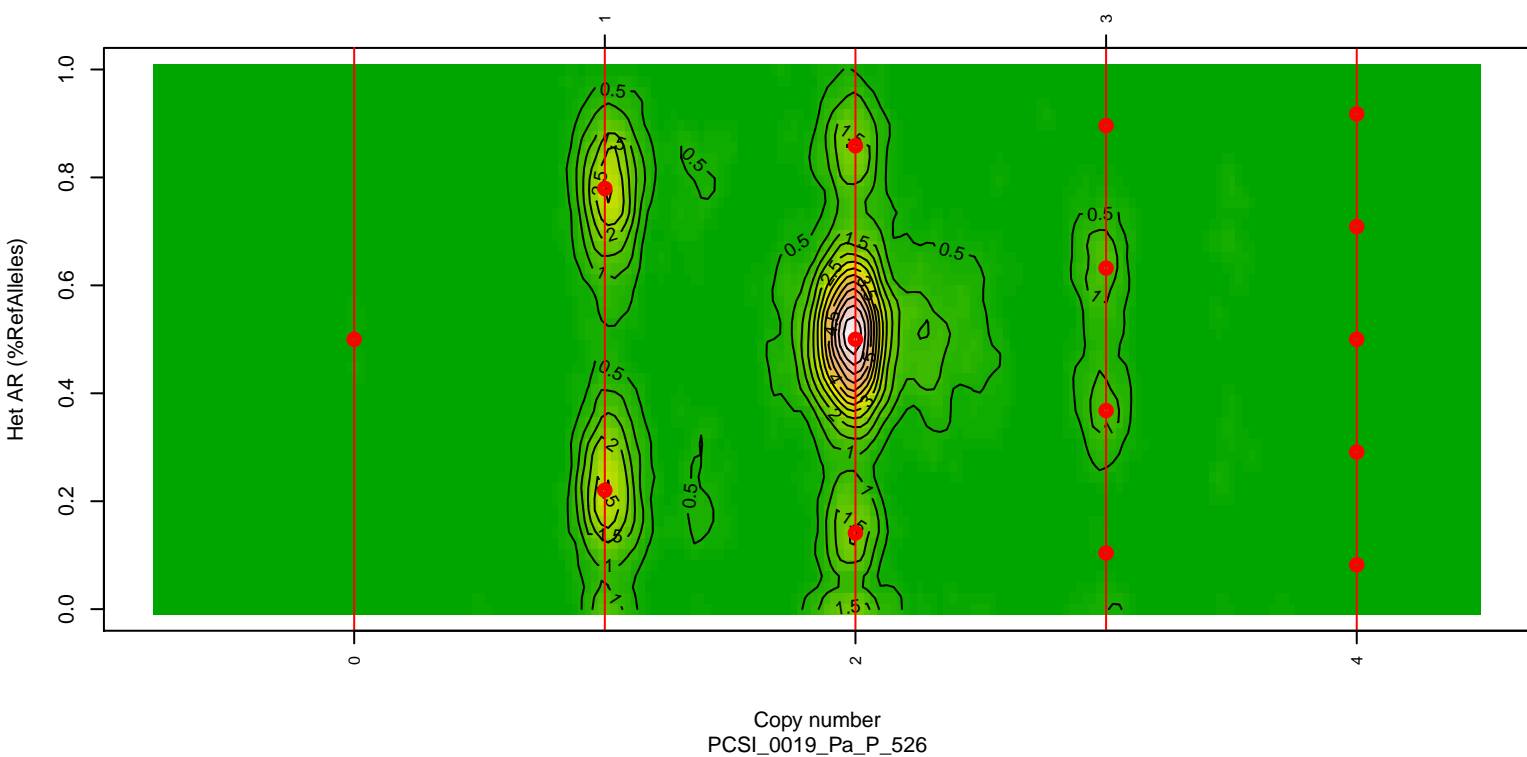

Copy number  
PCSI\_0019\_Pa\_P\_526

S:1.016, PLOIDY:1.954, %N:0.325, %T1:0.675

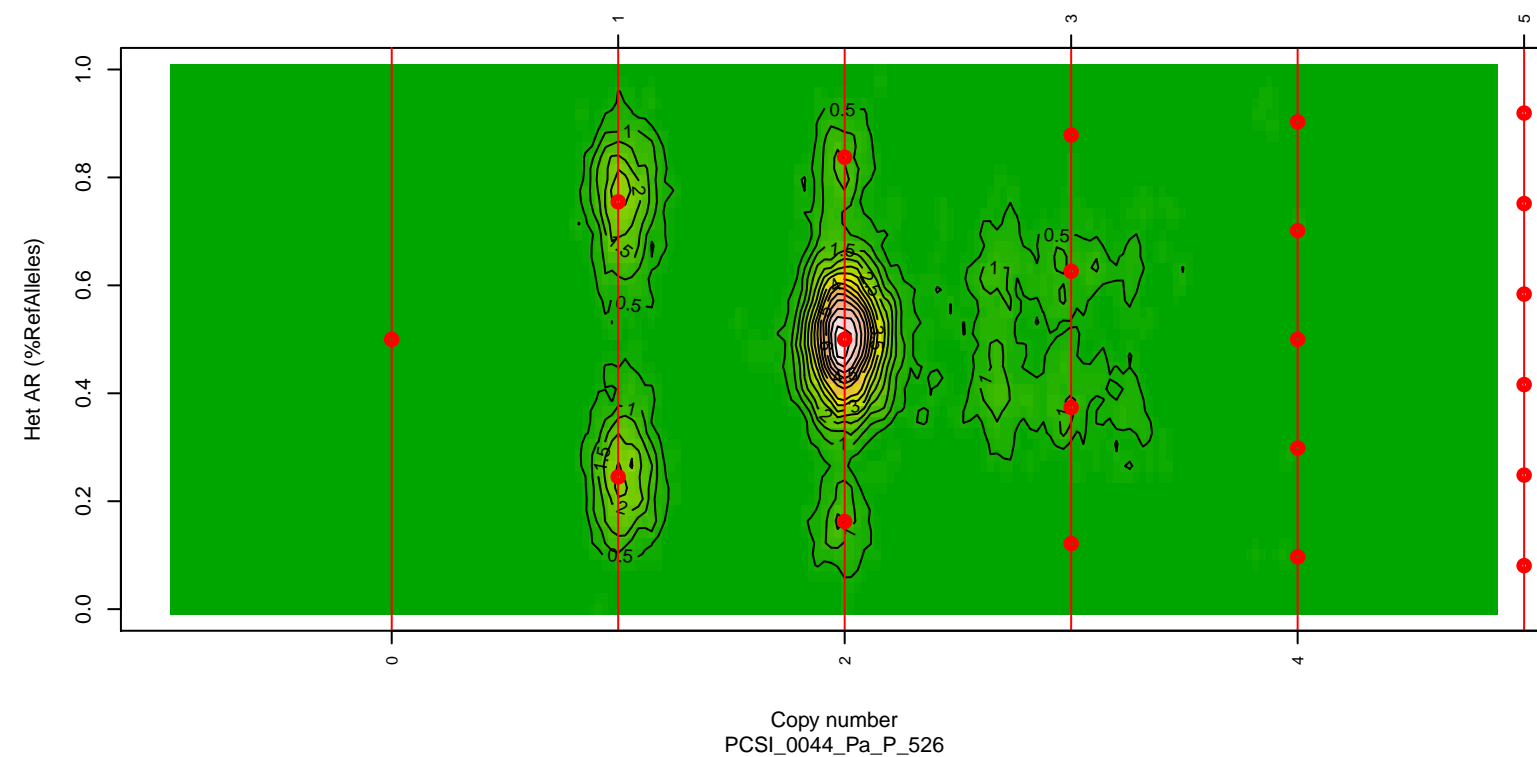

Copy number  
PCSI\_0044\_Pa\_P\_526

S:0.702, PLOIDY:3.177, %N:0.279, %T1:0.721

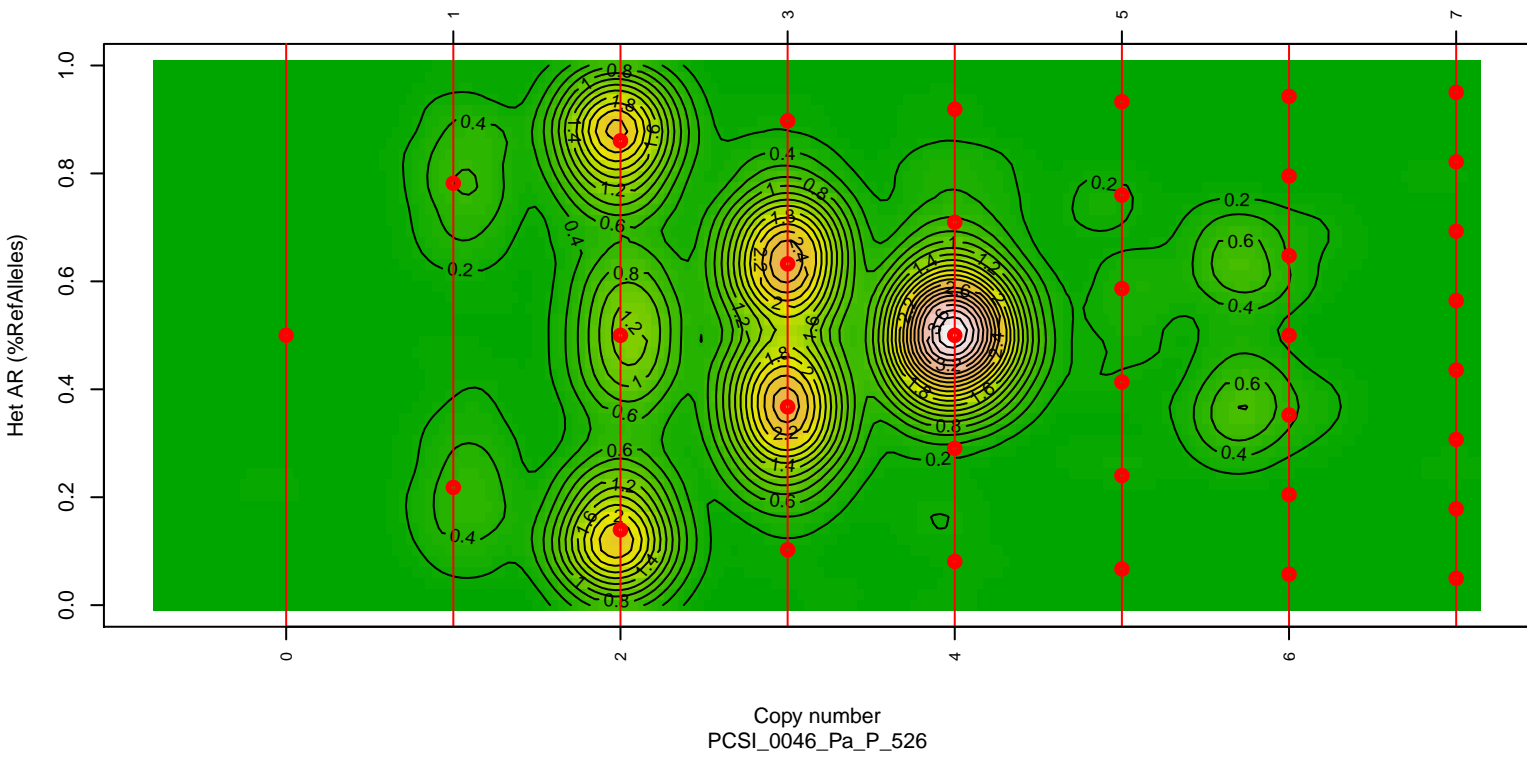

Copy number  
PCSI\_0046\_Pa\_P\_526

S:1.007, PLOIDY:1.976, %N:0.407, %T1:0.593

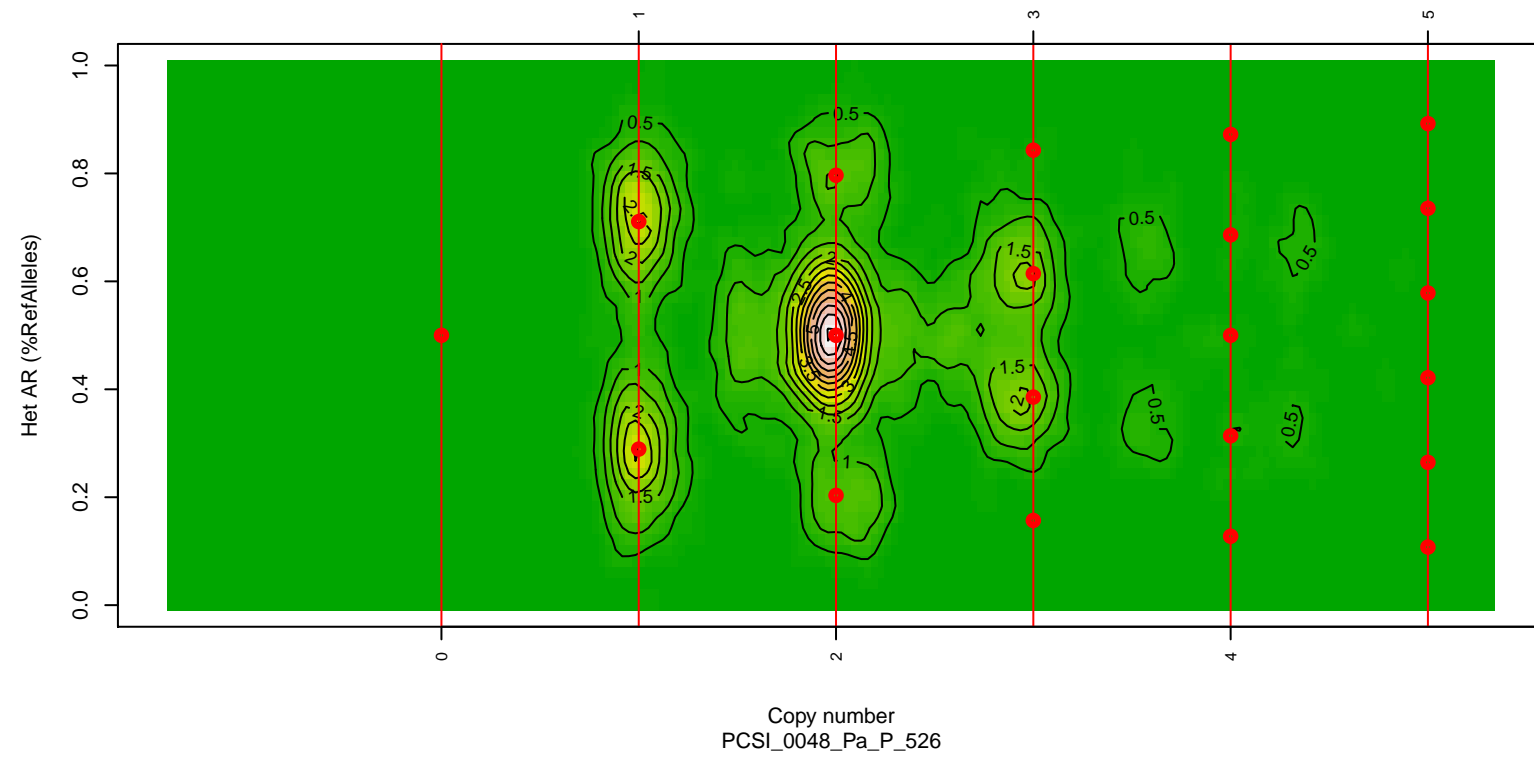

Copy number  
PCSI\_0048\_Pa\_P\_526

S:0.791, PLOIDY:3.17, %N:0.549, %T1:0.451

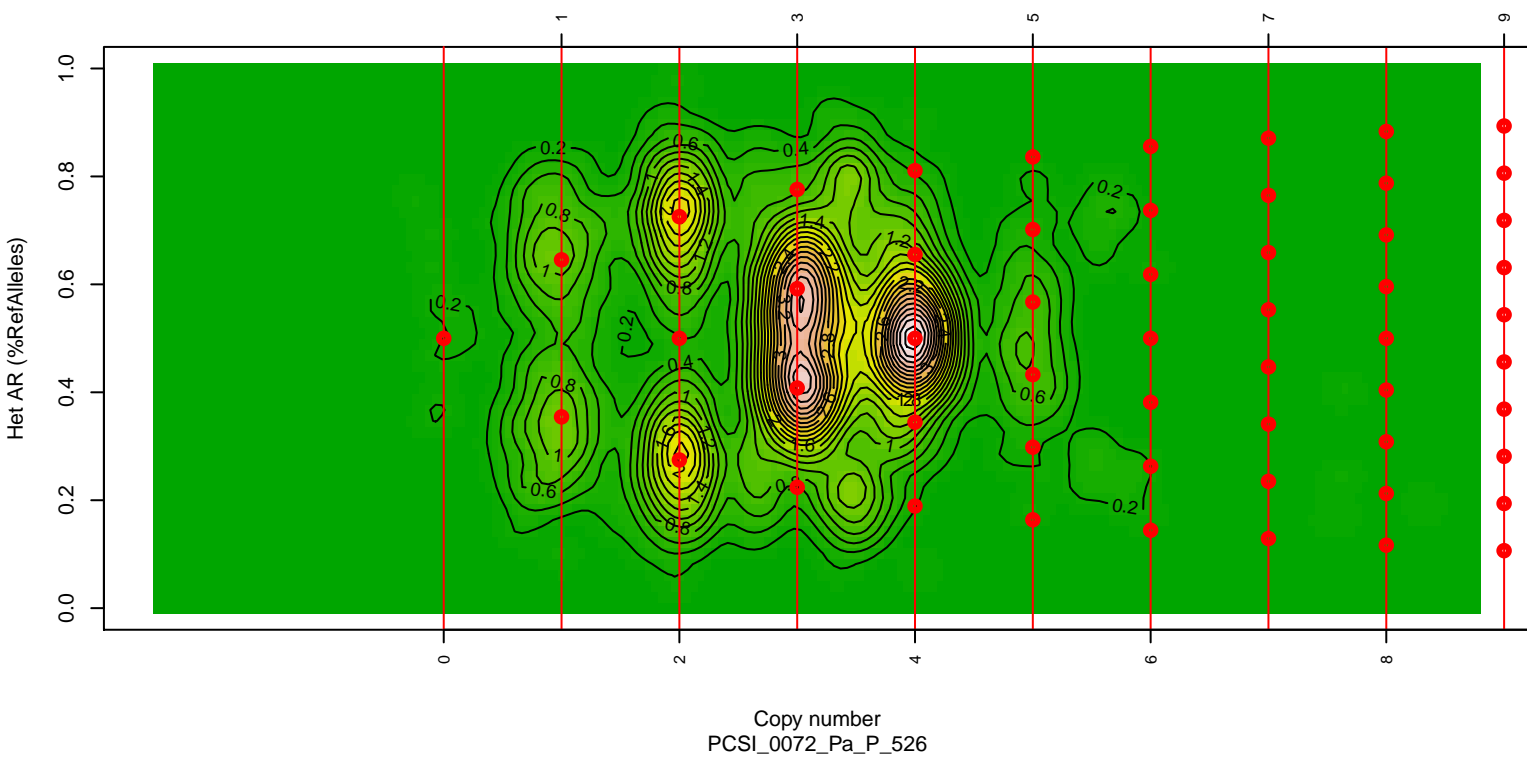

Copy number  
PCSI\_0072\_Pa\_P\_526

S:1.042, PLOIDY:1.888, %N:0.277, %T1:0.723

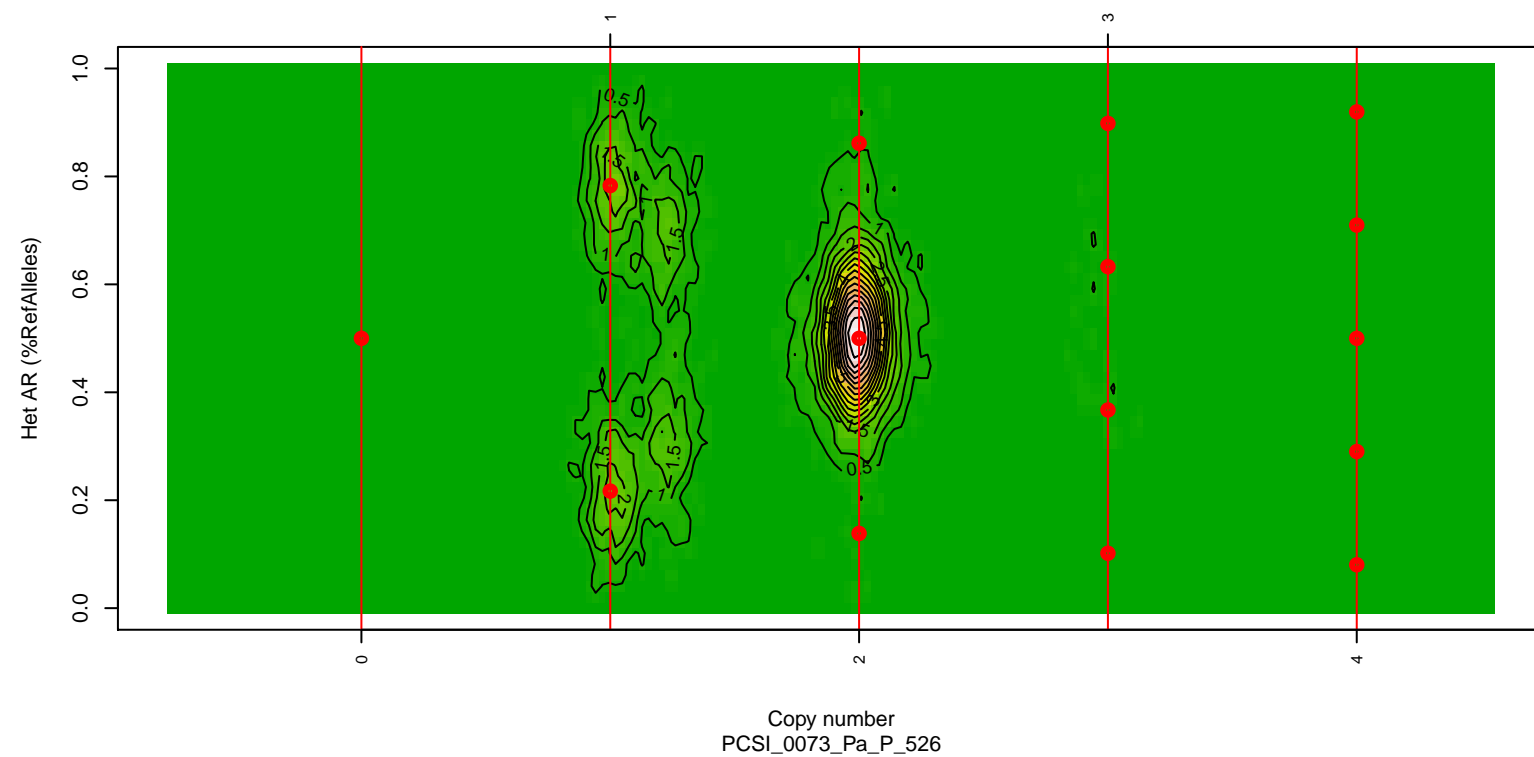

Copy number  
PCSI\_0073\_Pa\_P\_526

S:1.02, PLOIDY:1.933, %N:0.418, %T1:0.582

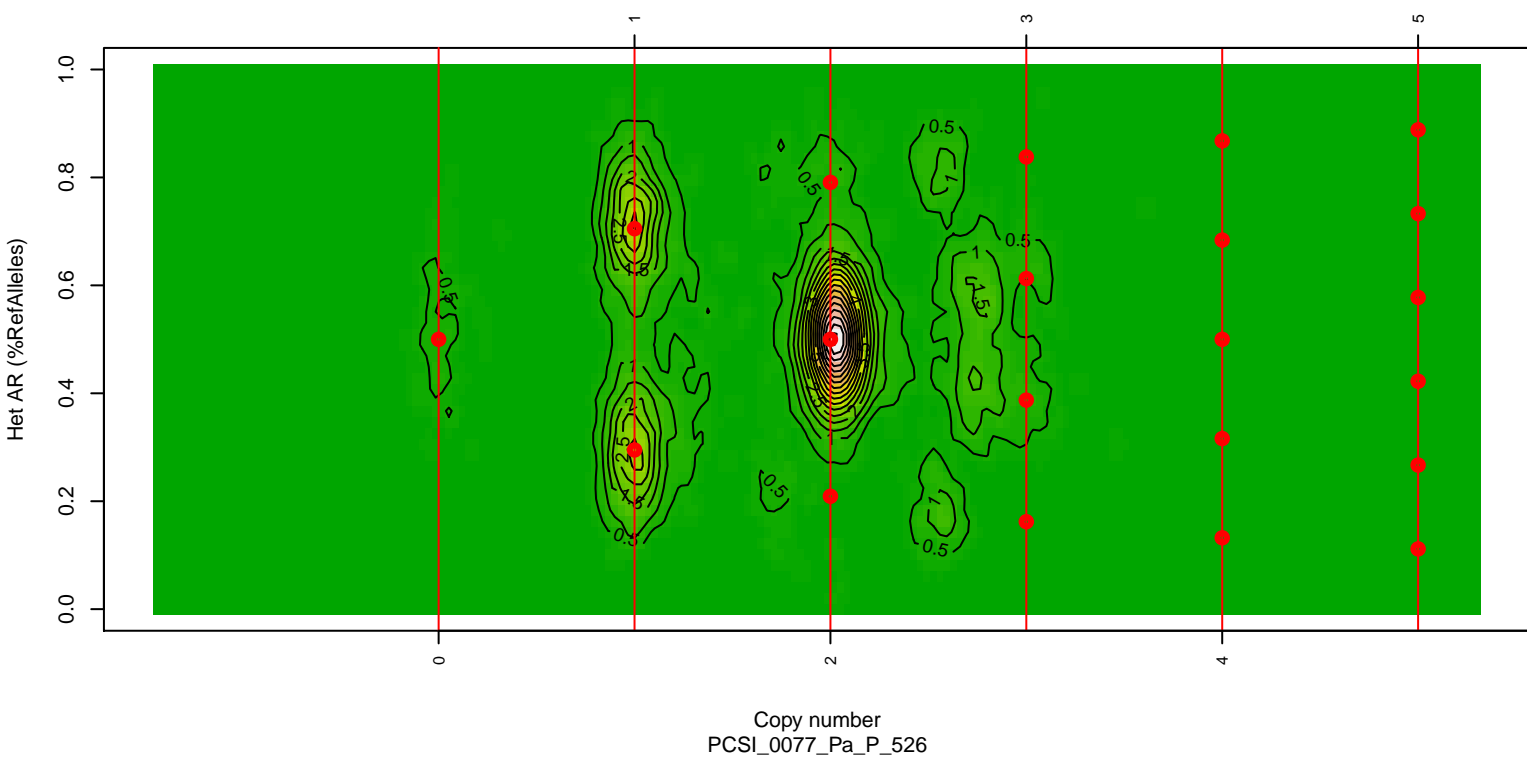

Copy number  
PCSI\_0077\_Pa\_P\_526

S:0.936, PLOIDY:2.199, %N:0.316, %T1:0.684

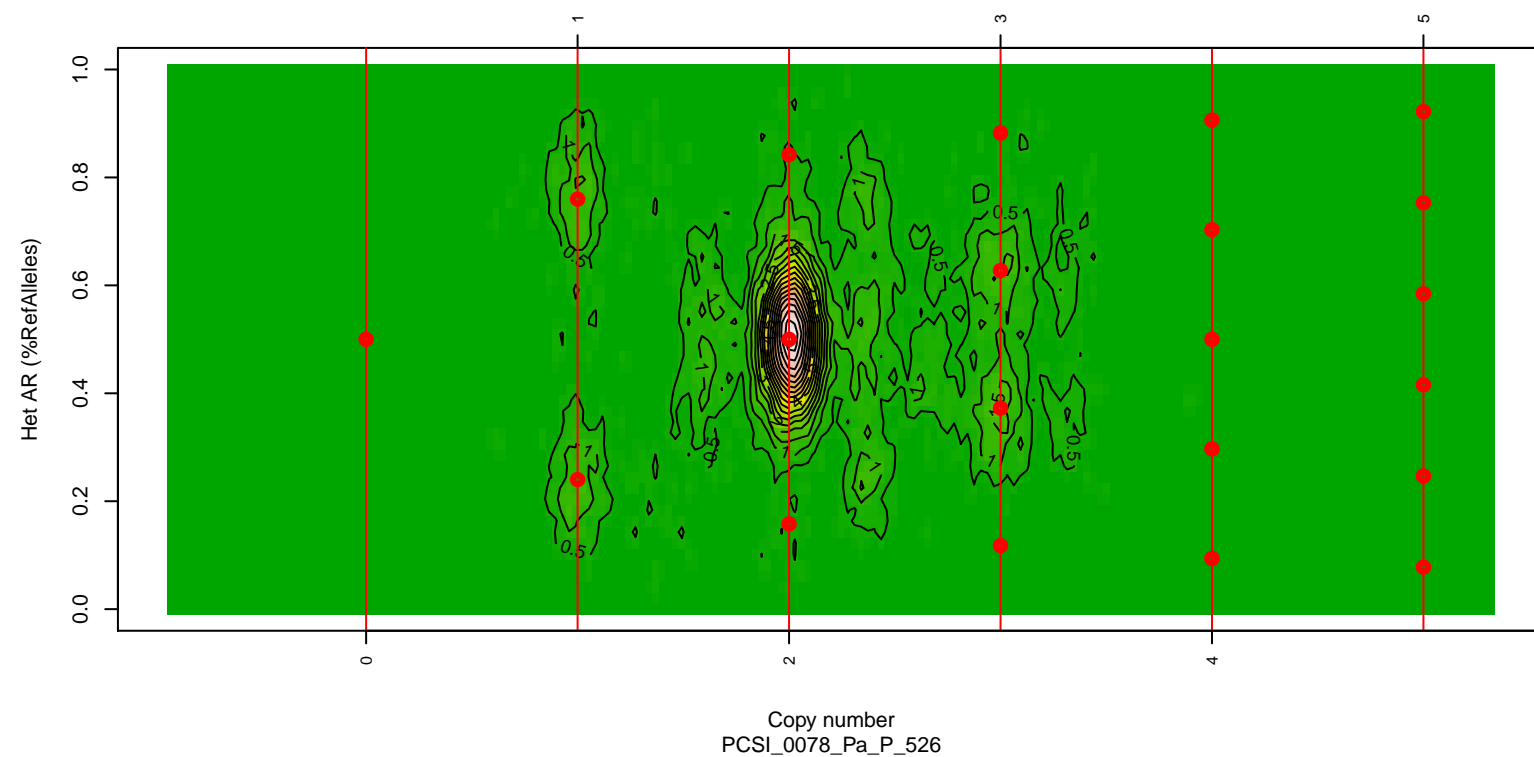

Copy number  
PCSI\_0078\_Pa\_P\_526

S:0.743, PLOIDY:3.381, %N:0.5, %T1:0.5

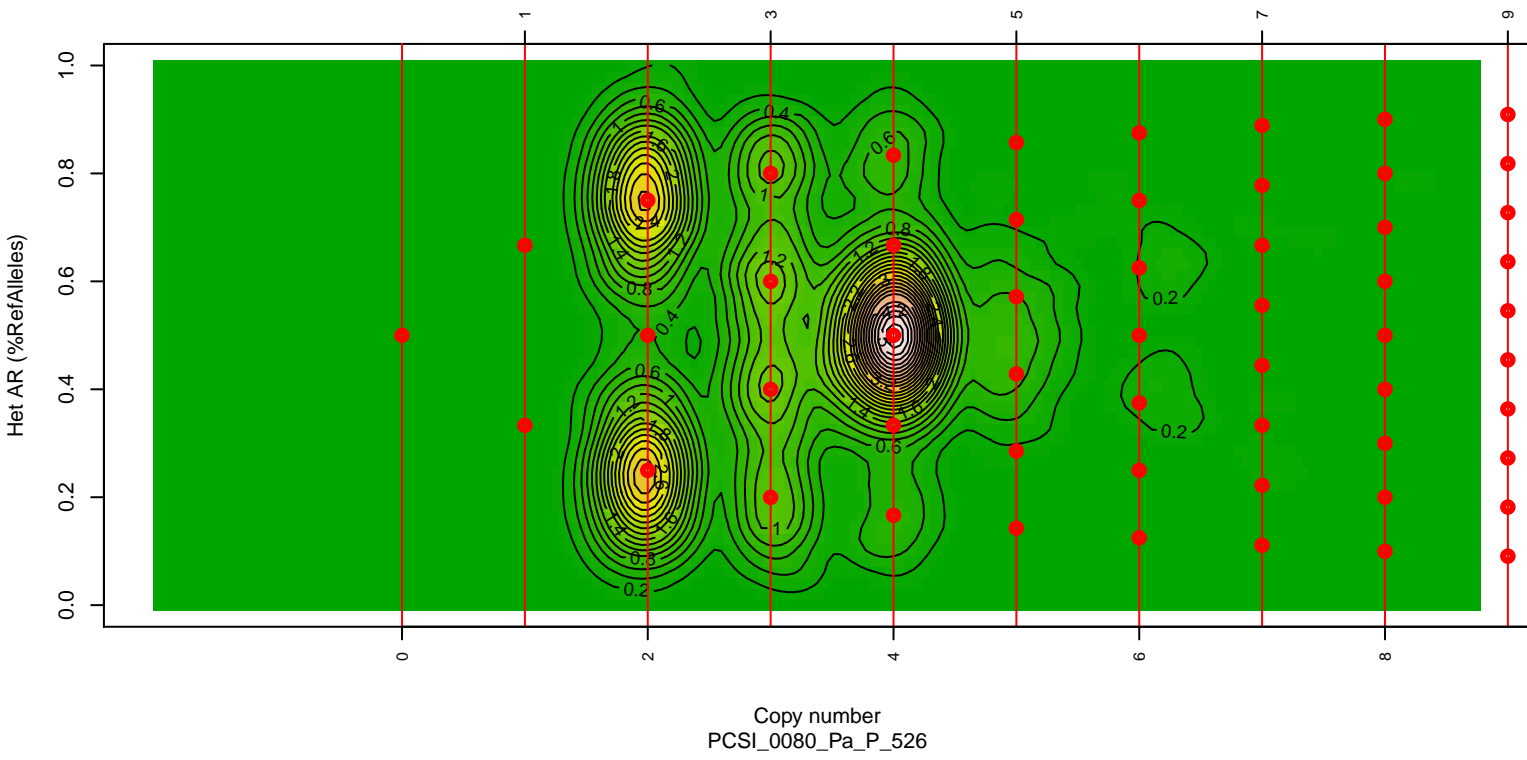

S:1.125, PLOIDY:1.735, %N:0.161, %T1:0.839

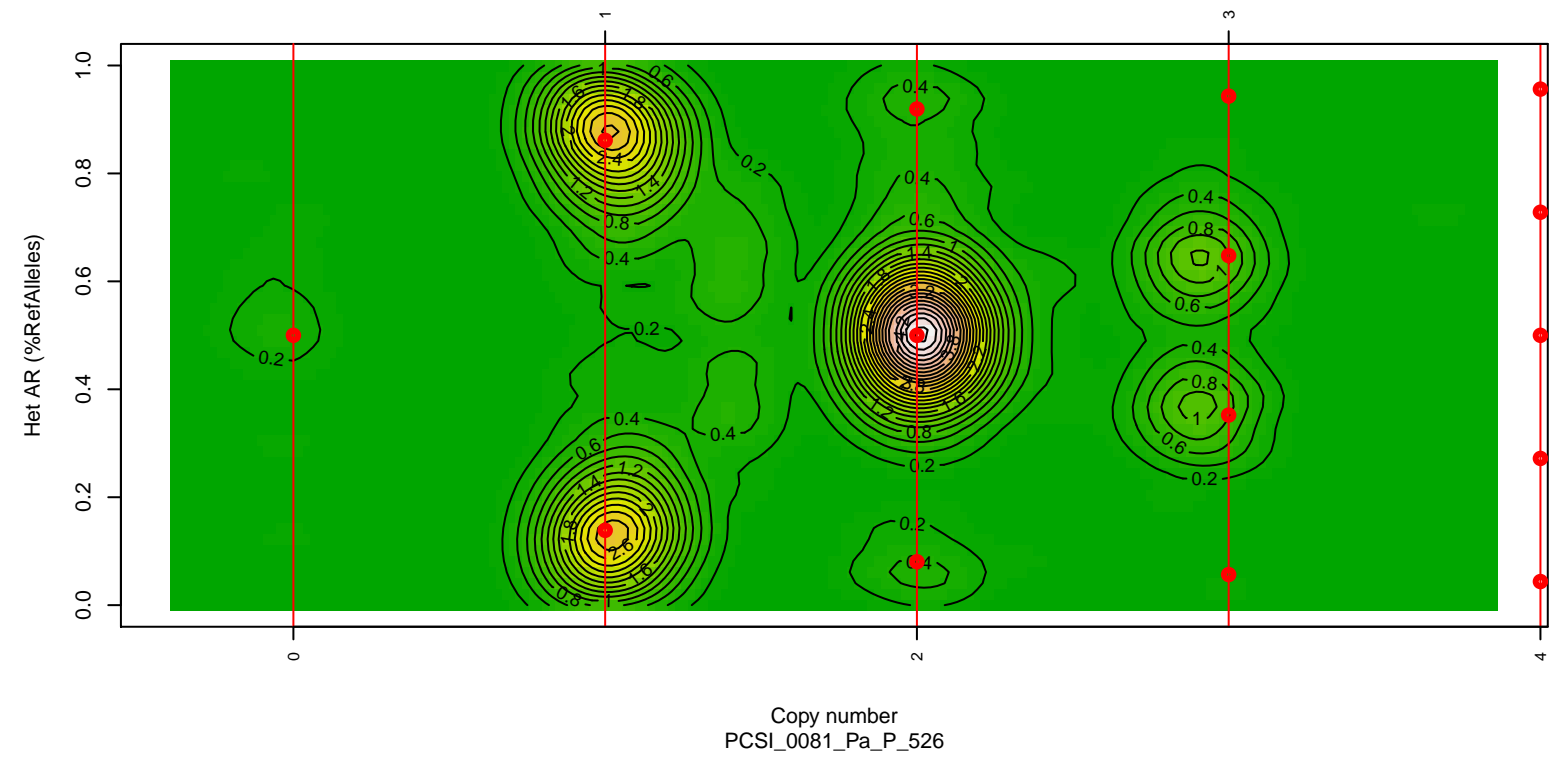

S:0.757, PLOIDY:2.995, %N:0.355, %T1:0.645

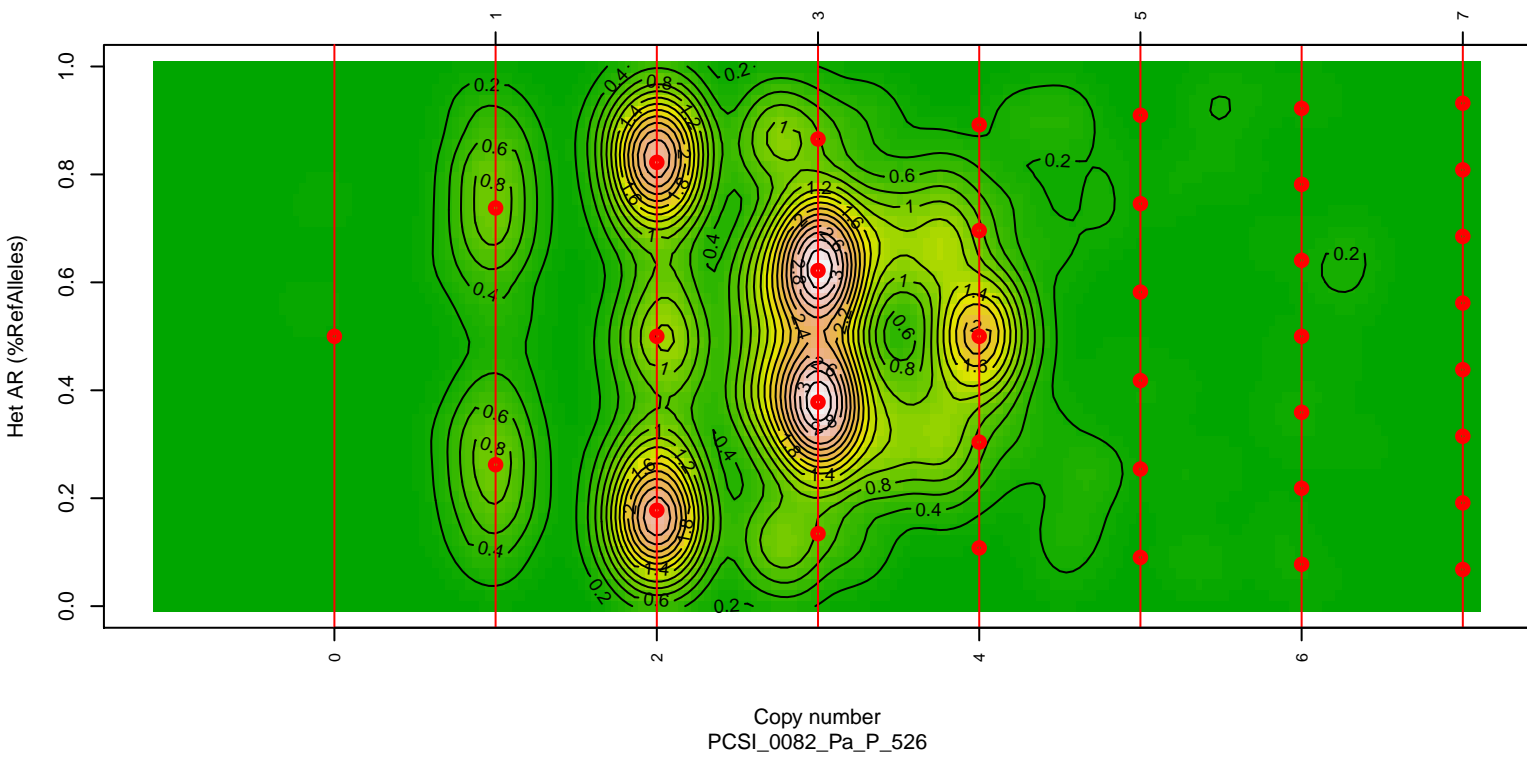

S:0.935, PLOIDY:2.18, %N:0.226, %T1:0.774

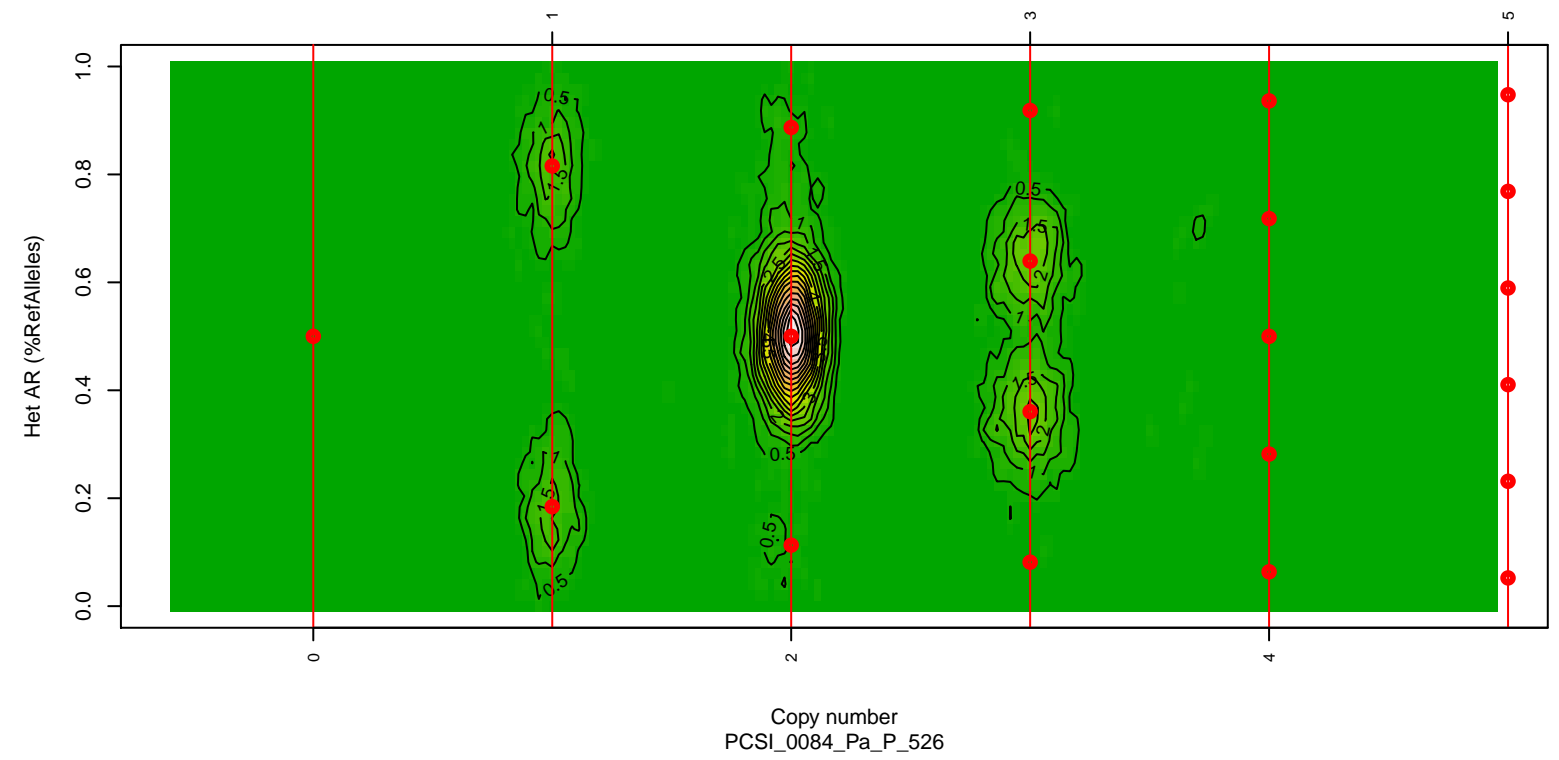

S:0.738, PLOIDY:3.225, %N:0.42, %T1:0.58

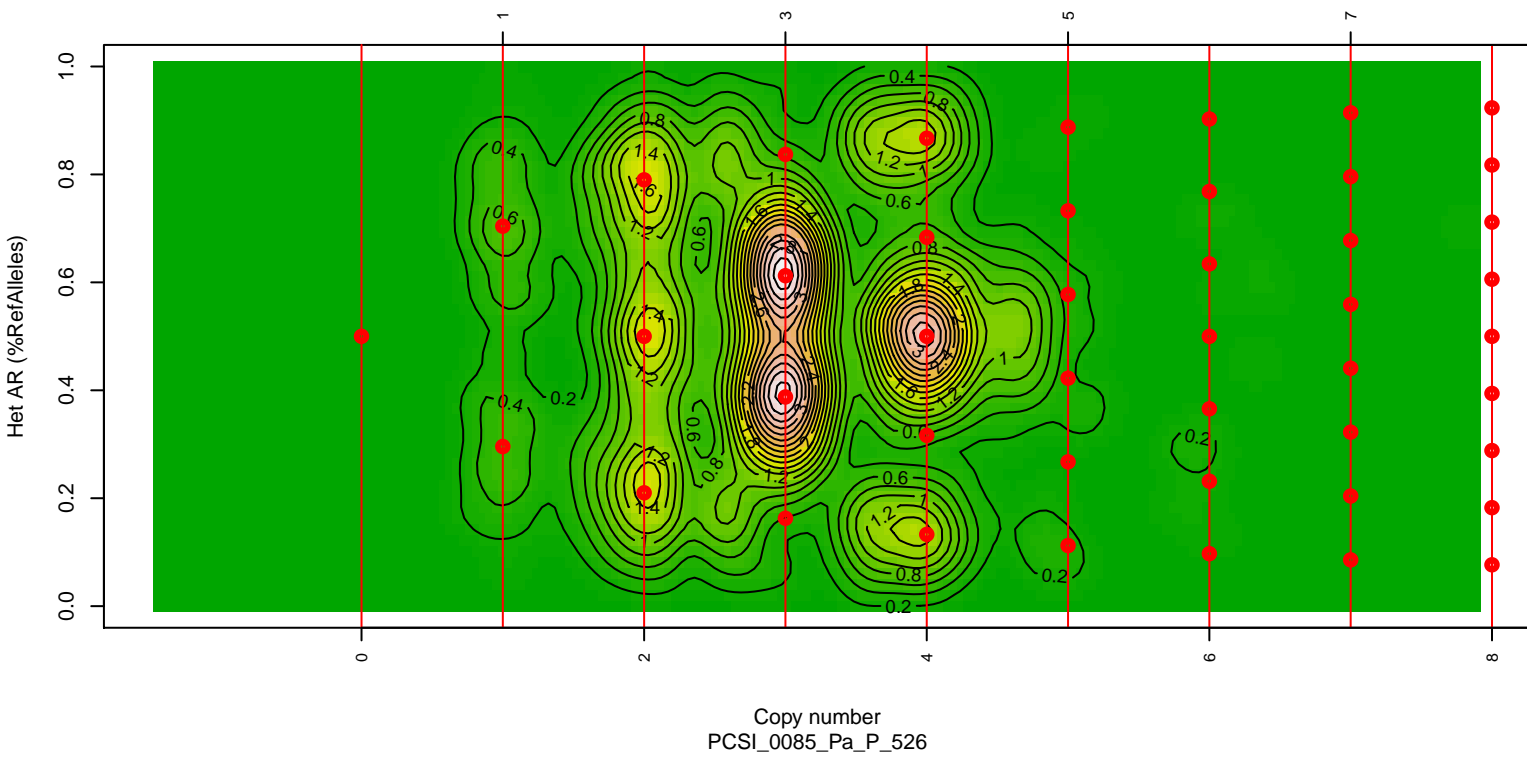

S:0.57, PLOIDY:3.936, %N:0.221, %T1:0.779

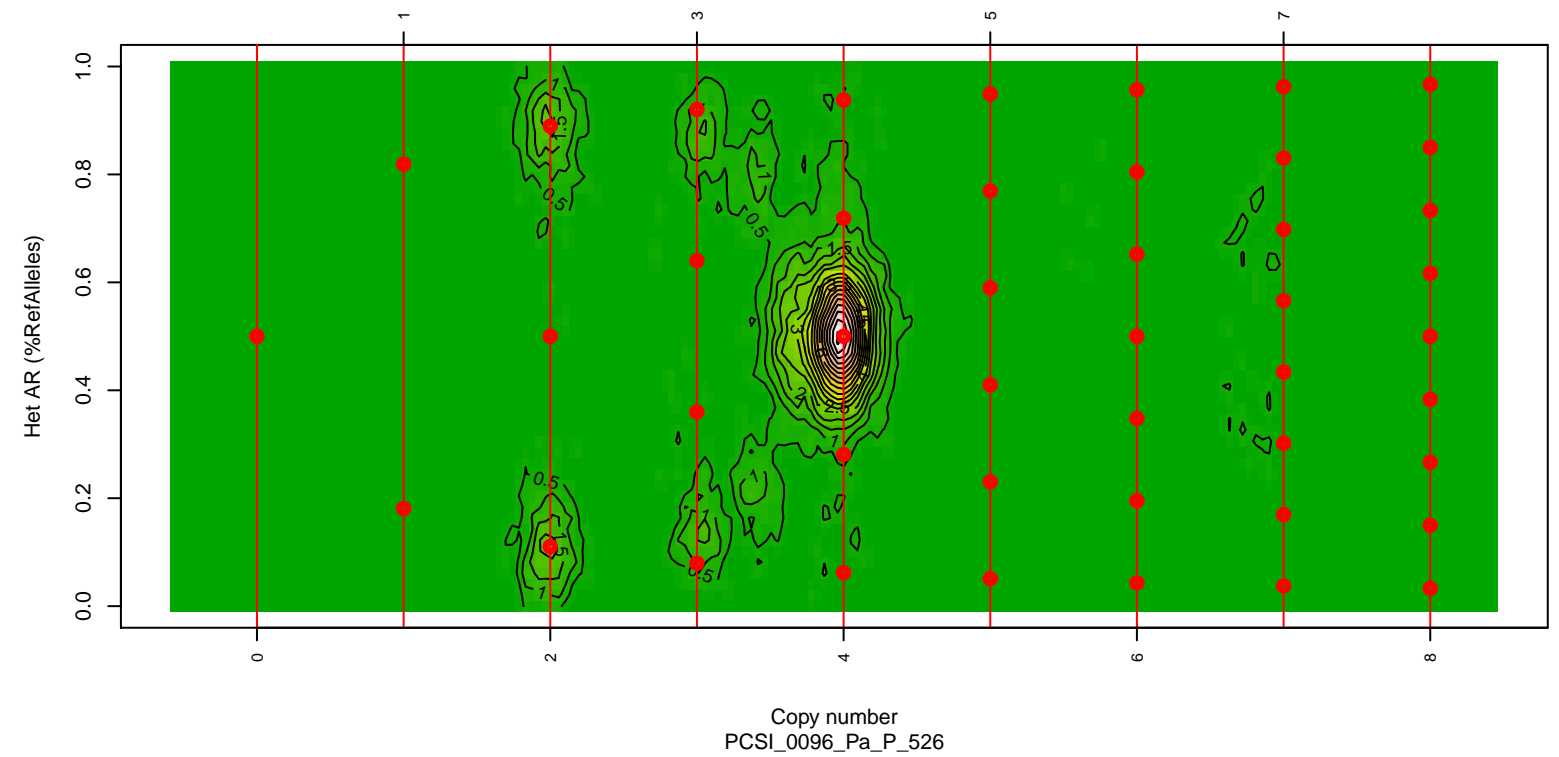



S:0.543, PLOIDY:3.876, %N:0.102, %T1:0.898

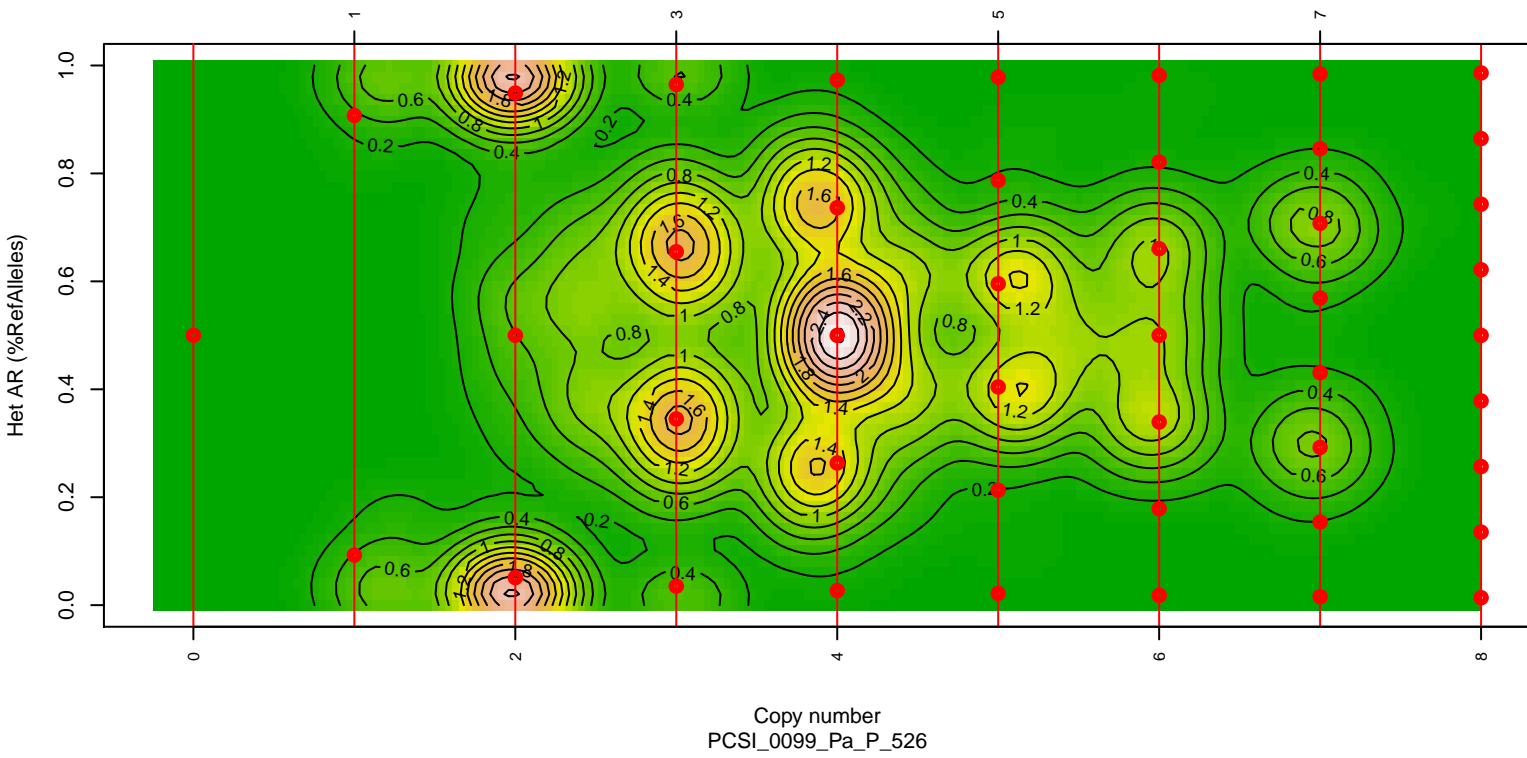

S:1.073, PLOIDY:1.836, %N:0.171, %T1:0.829

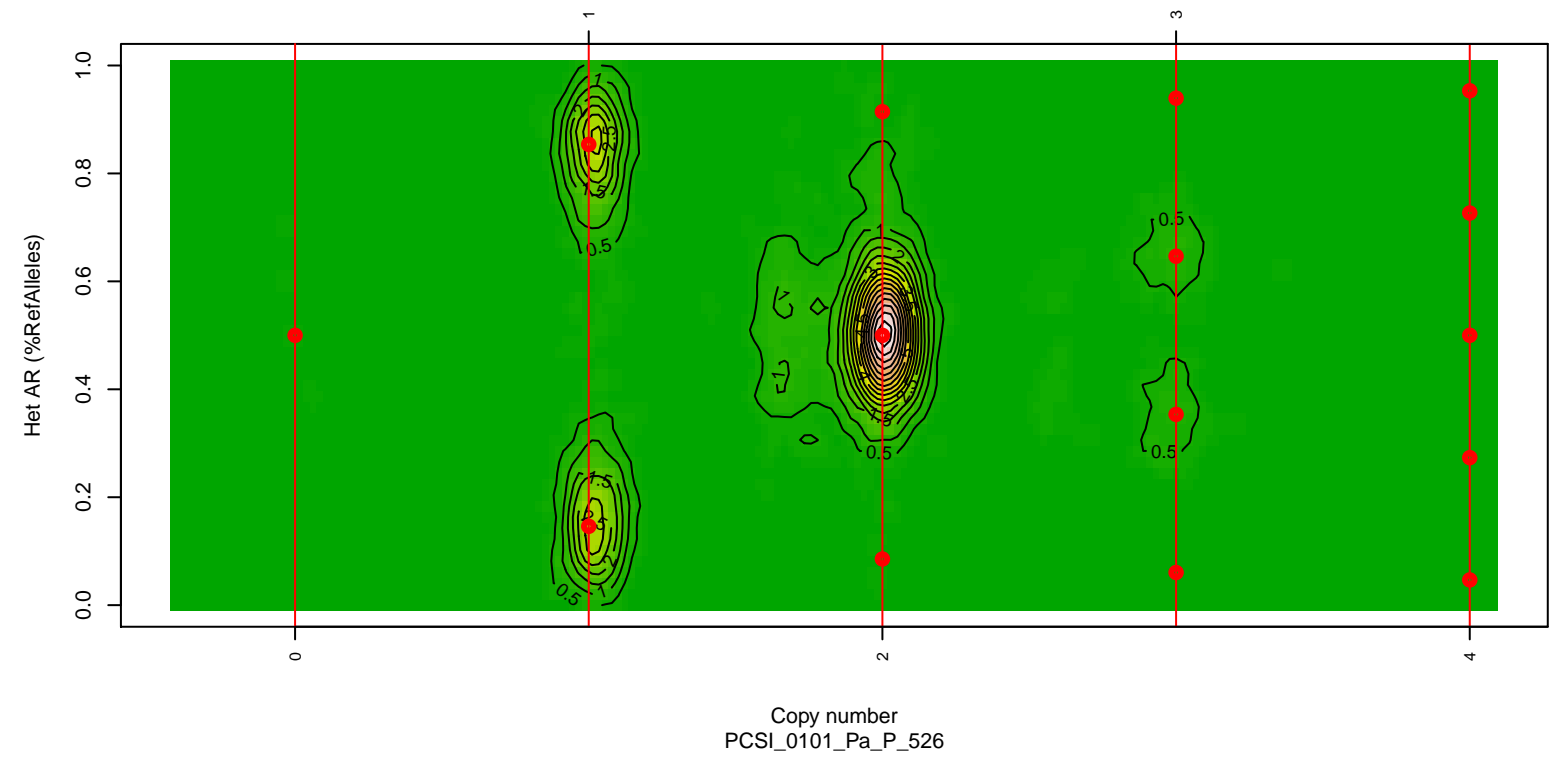

S:1.062, PLOIDY:1.797, %N:0.424, %T1:0.576

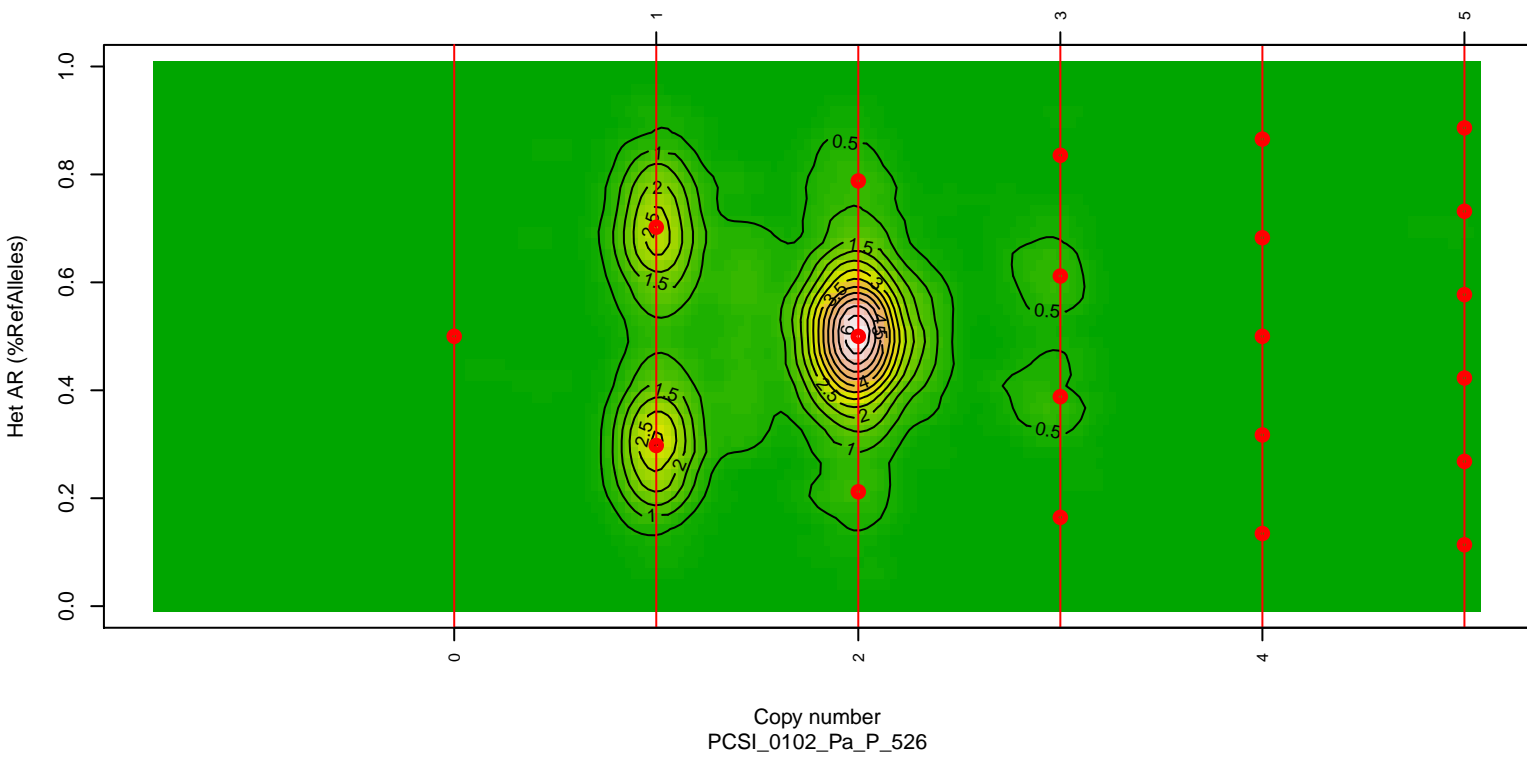

S:0.948, PLOIDY:2.159, %N:0.306, %T1:0.694

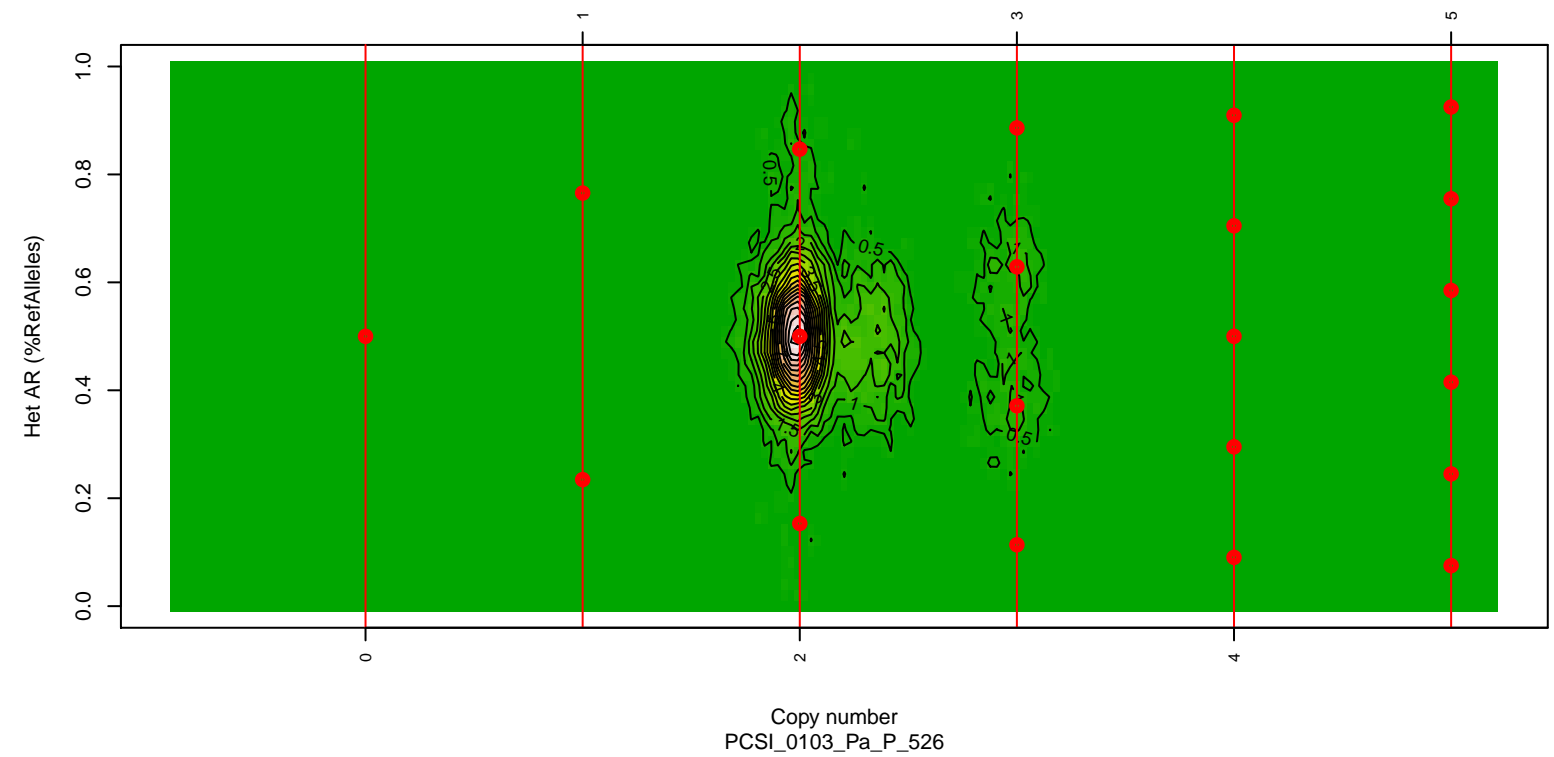

S:1.014, PLOIDY:1.967, %N:0.15, %T1:0.85

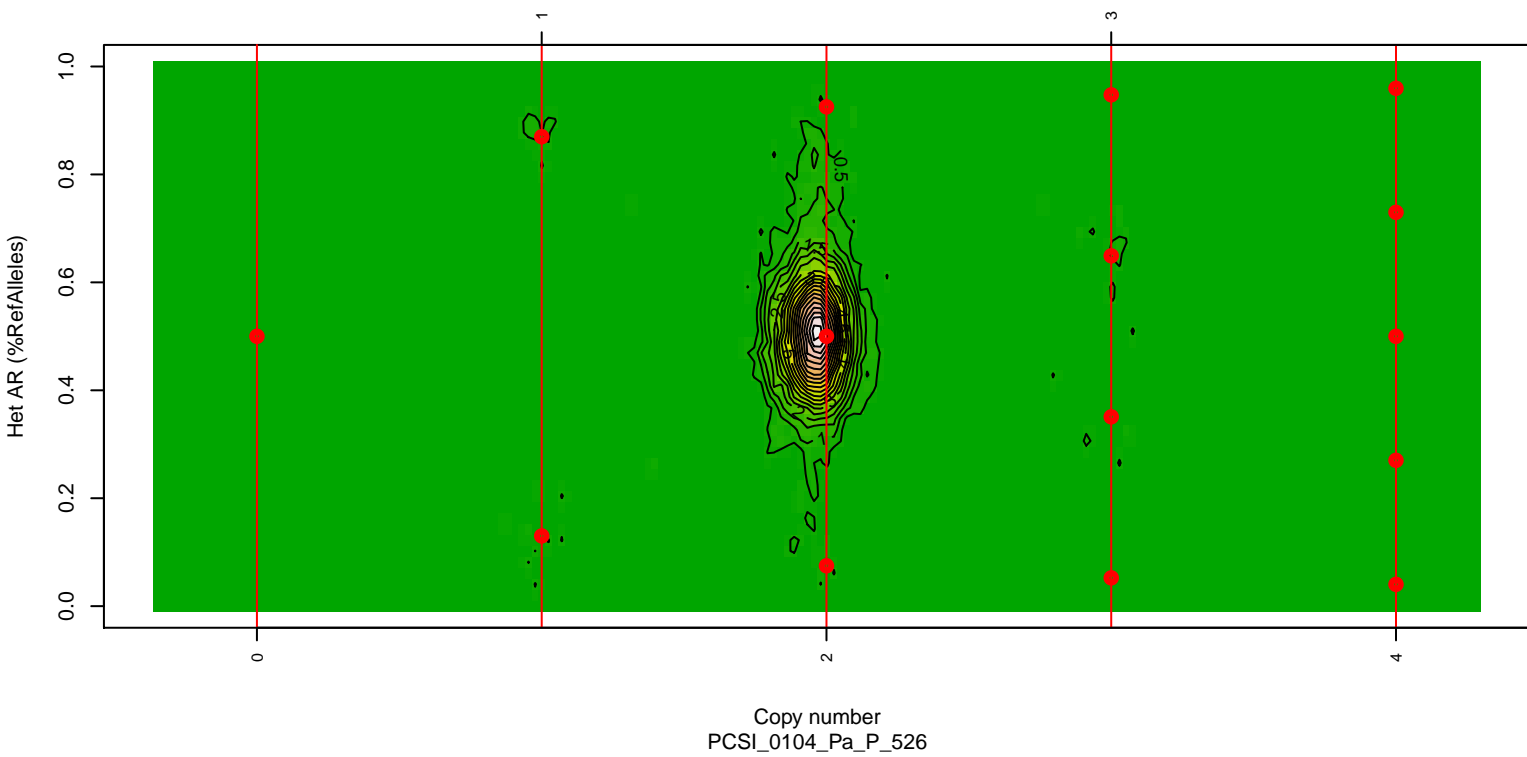

S:0.683, PLOIDY:3.727, %N:0.464, %T1:0.536

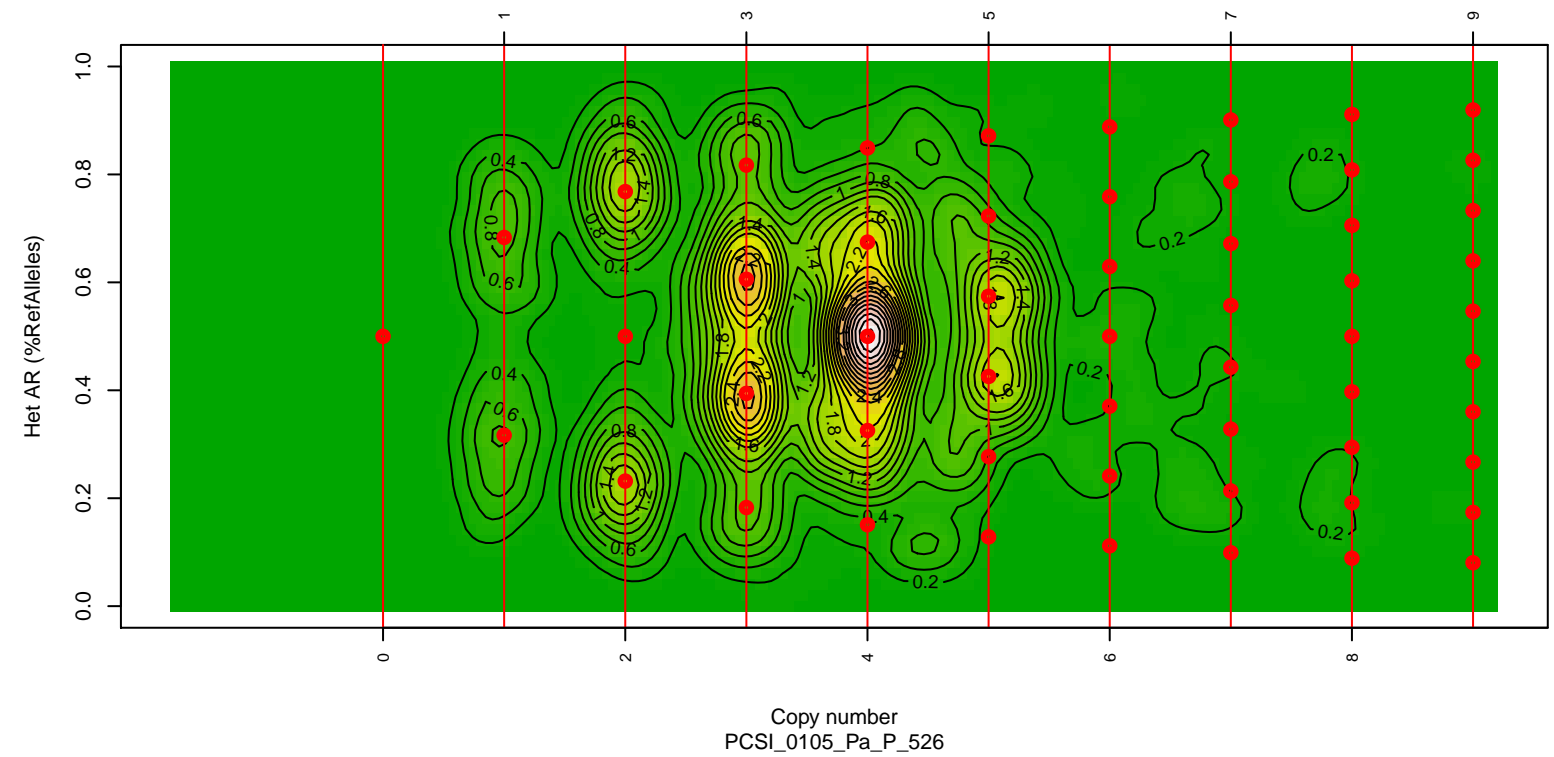

S:1.06, PLOIDY:1.841, %N:0.289, %T1:0.711

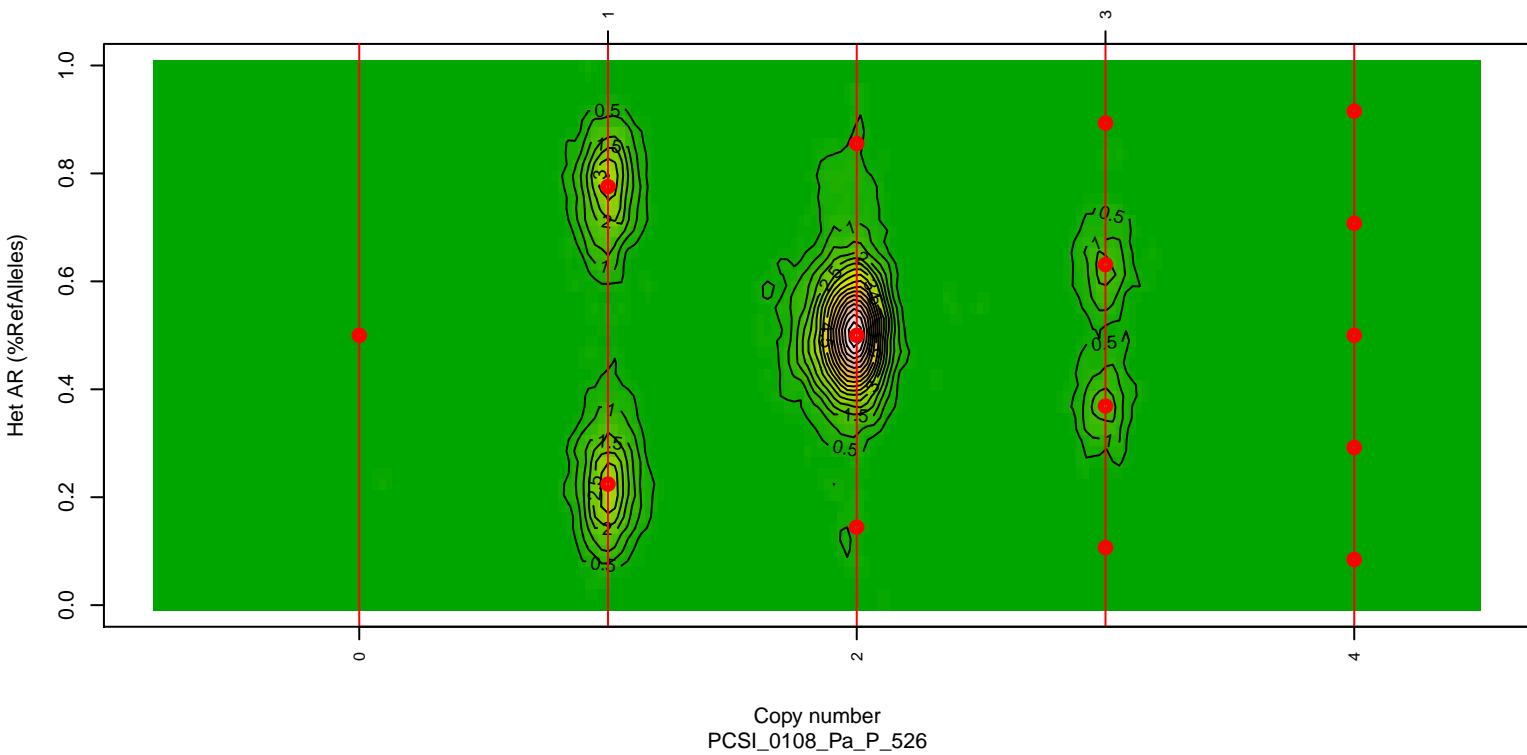

S:1.029, PLOIDY:1.94, %N:0.068, %T1:0.932

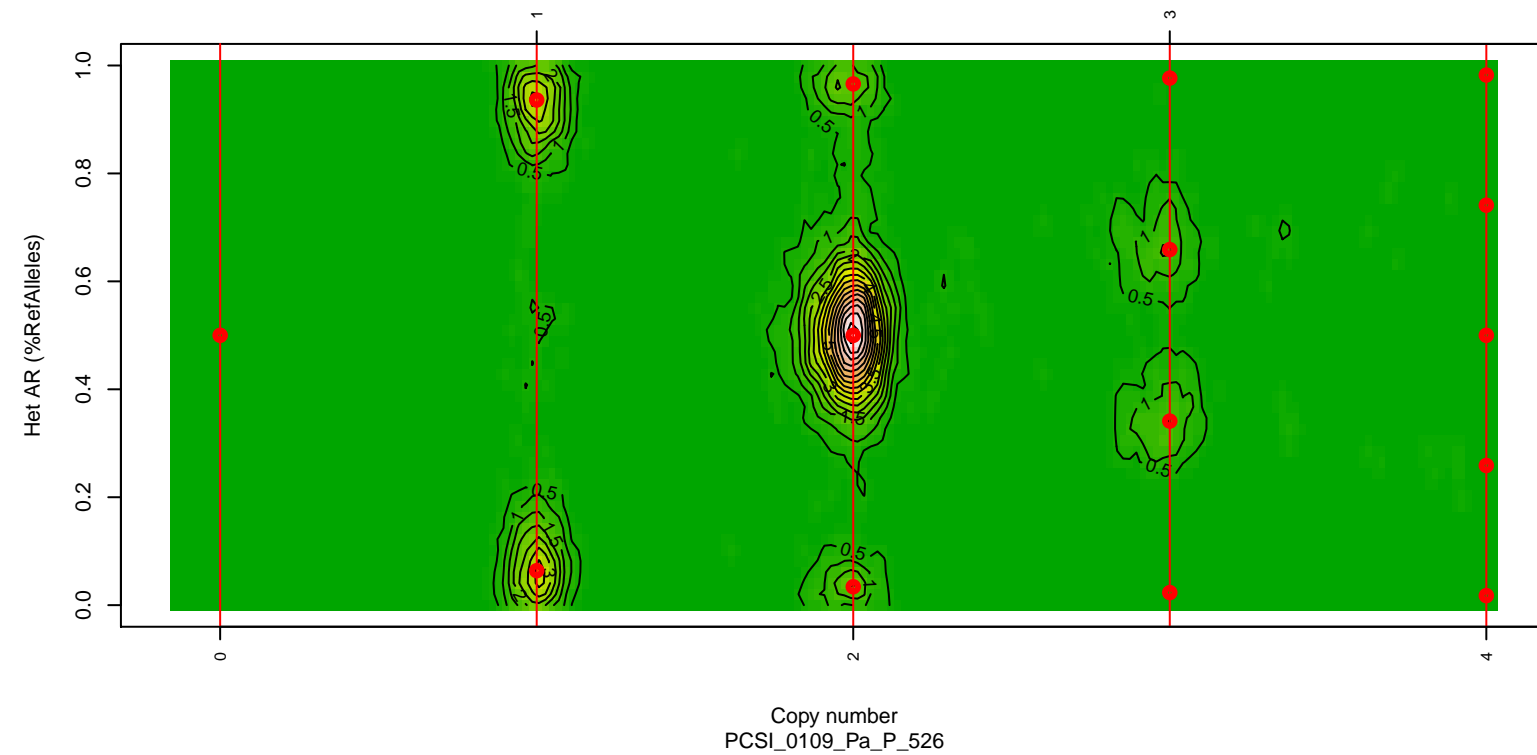

S:0.725, PLOIDY:2.916, %N:0.172, %T1:0.828

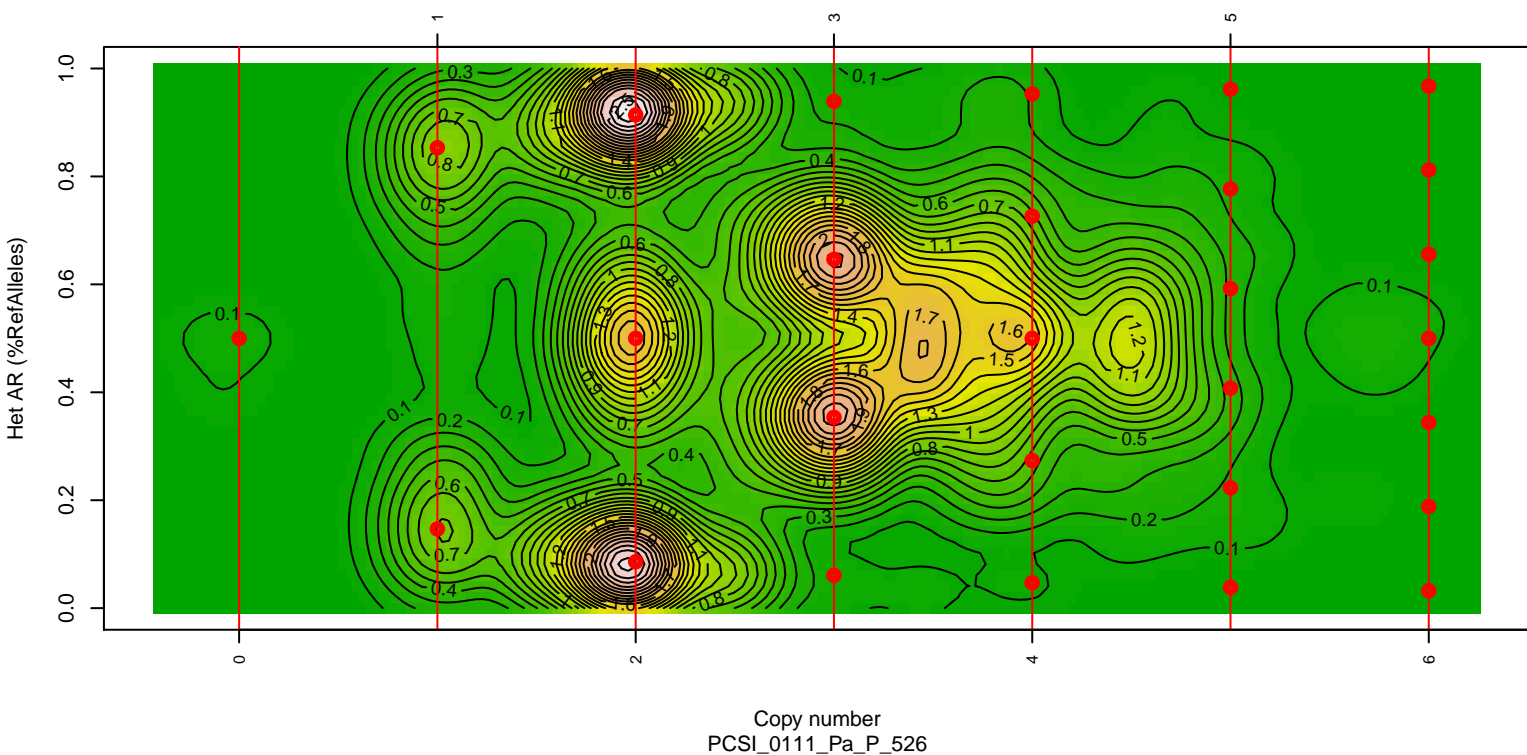

S:0.595, PLOIDY:3.624, %N:0.162, %T1:0.838

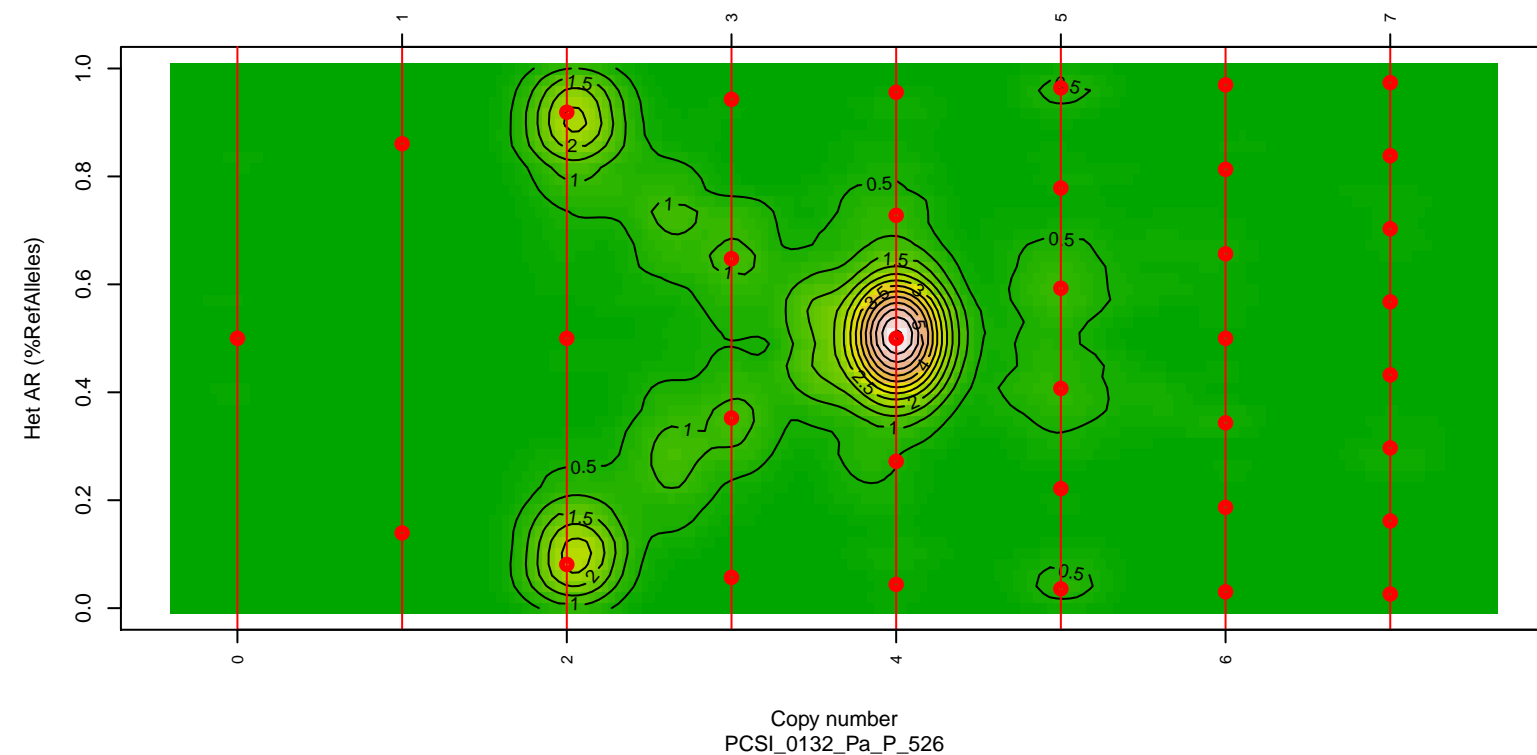

S:0.42, PLOIDY:5.496, %N:0.21, %T1:0.79

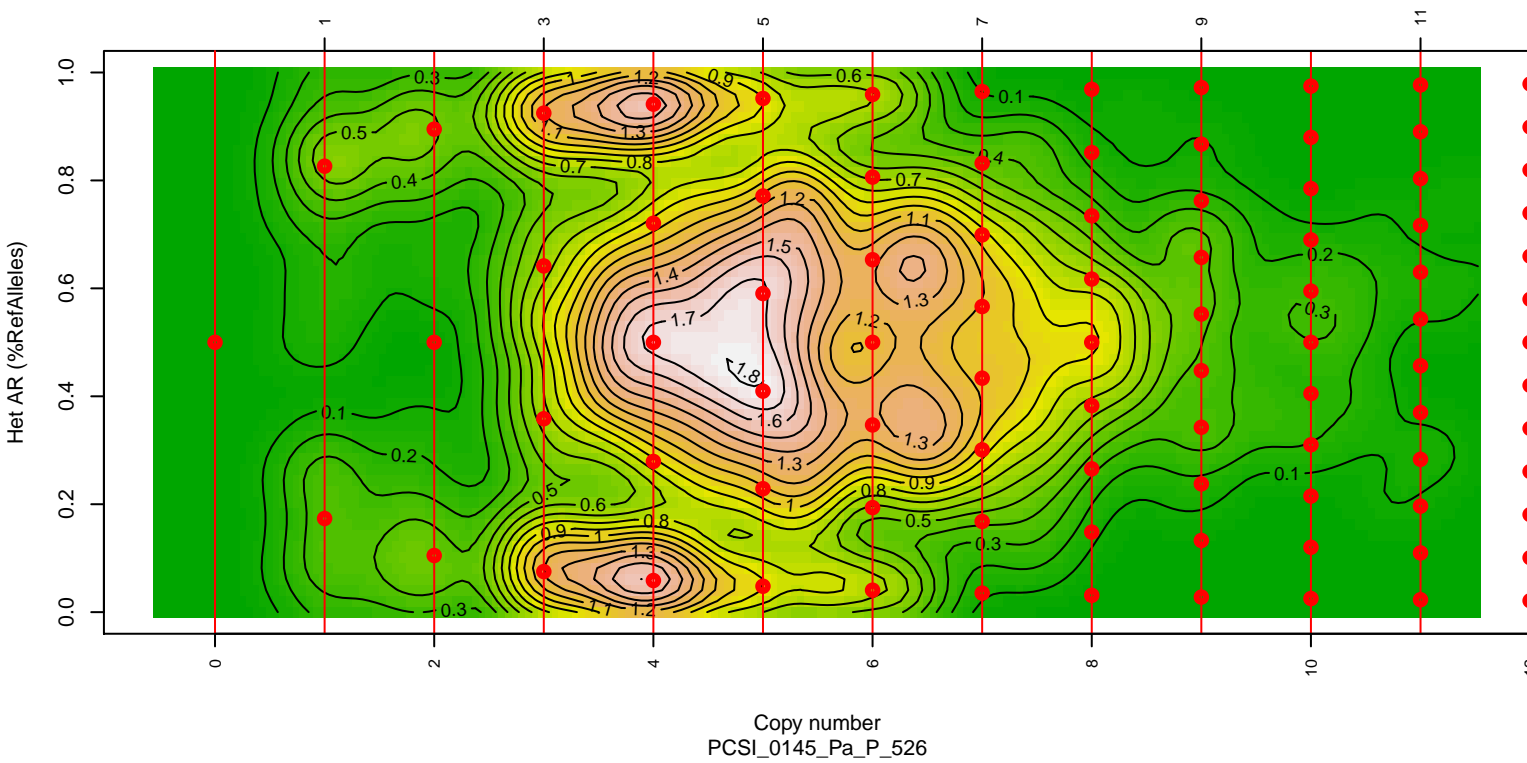

S:0.998, PLOIDY:2.005, %N:0.328, %T1:0.672

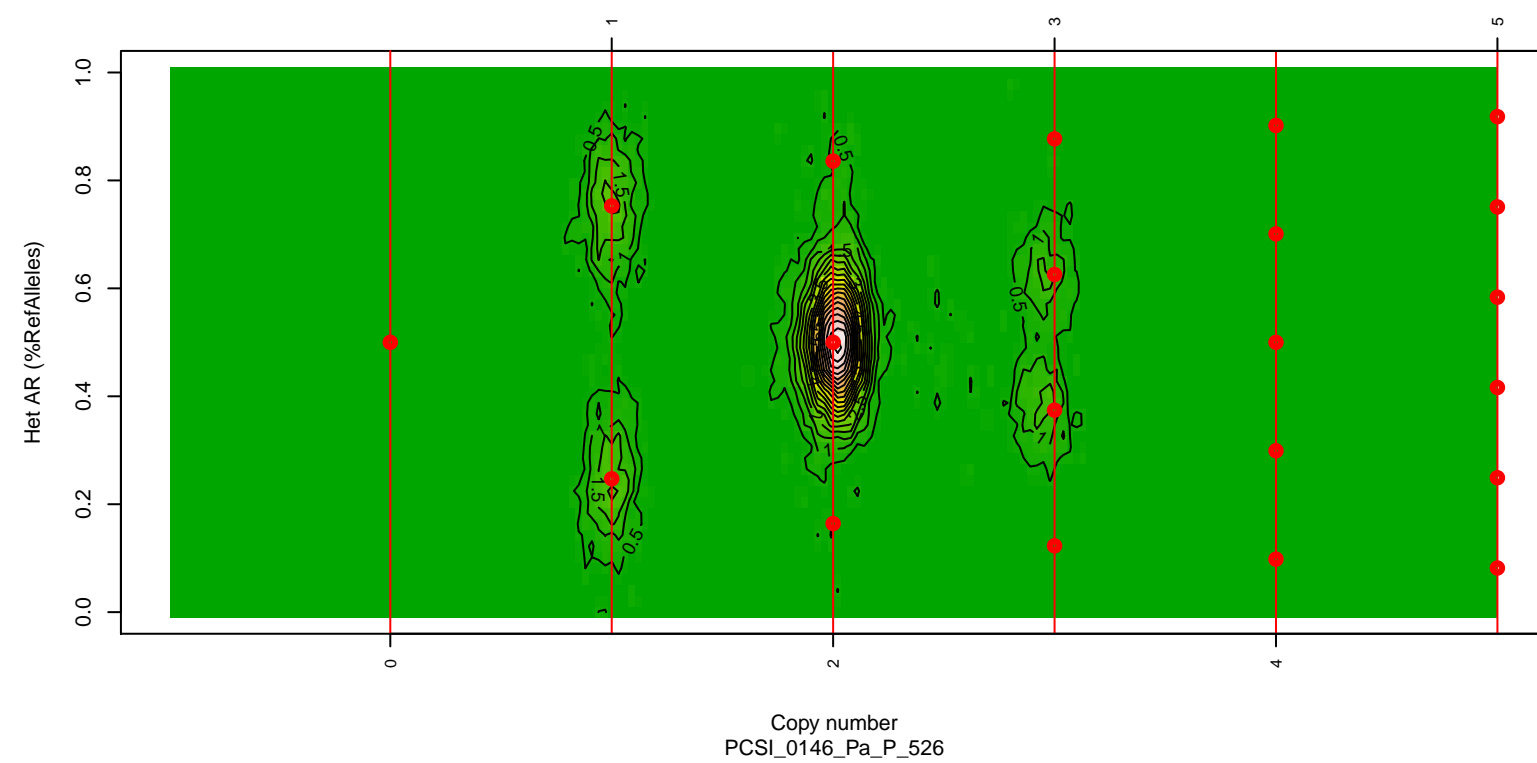



S:0.758, PLOIDY:3.025, %N:0.378, %T1:0.622

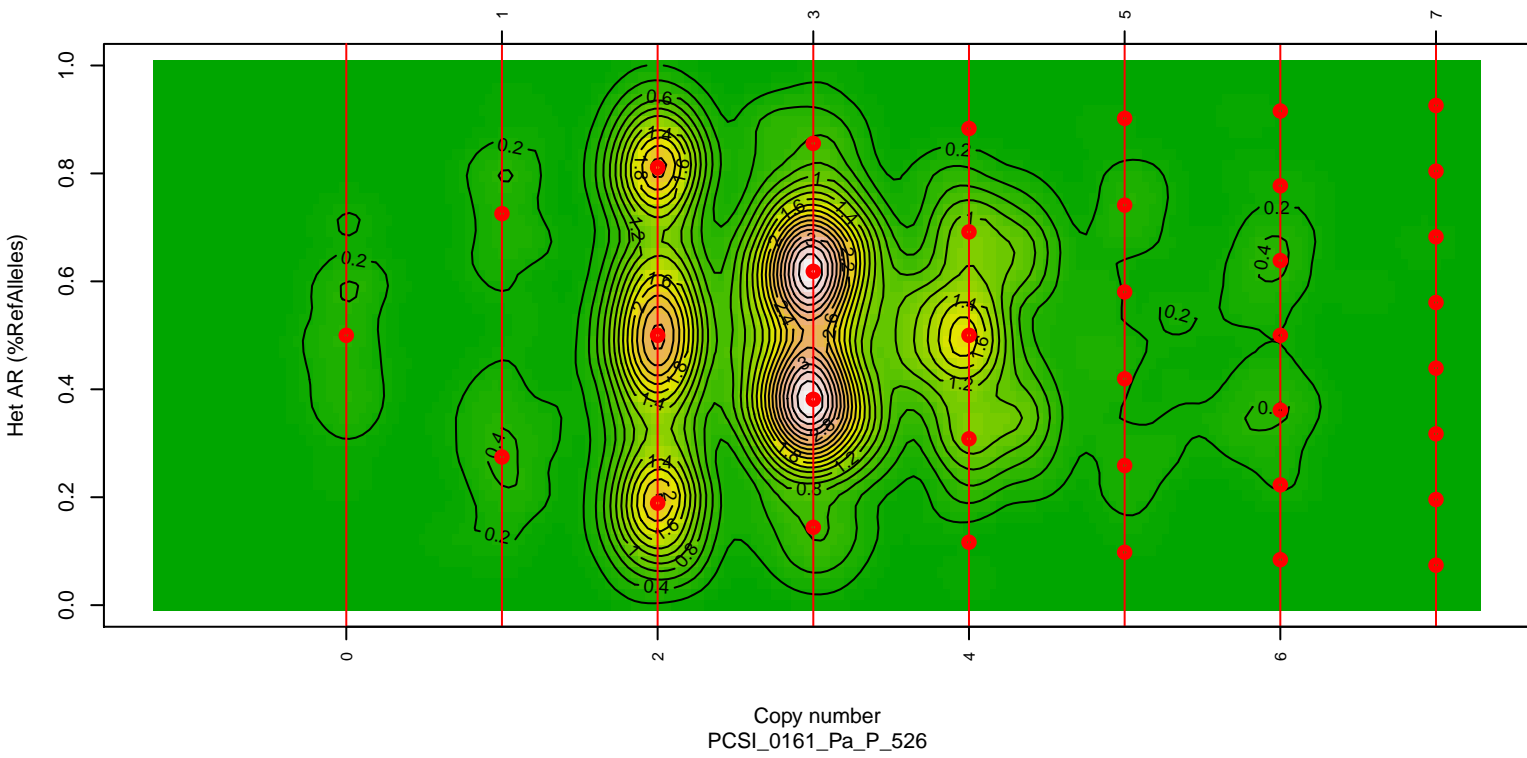

Copy number  
PCSI\_0161\_Pa\_P\_526

S:0.767, PLOIDY:2.968, %N:0.373, %T1:0.627

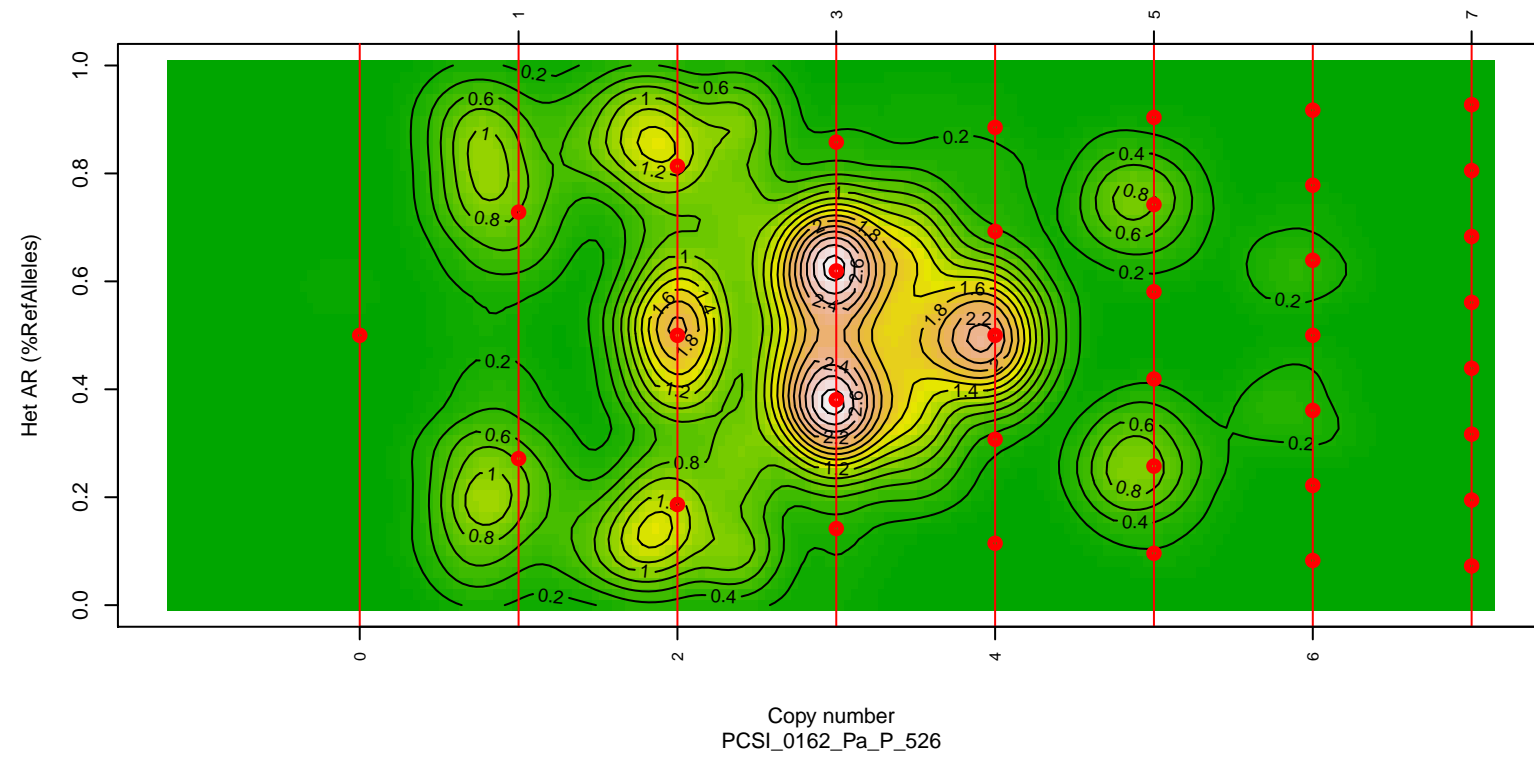

Copy number  
PCSI\_0162\_Pa\_P\_526

S:0.895, PLOIDY:2.282, %N:0.17, %T1:0.83

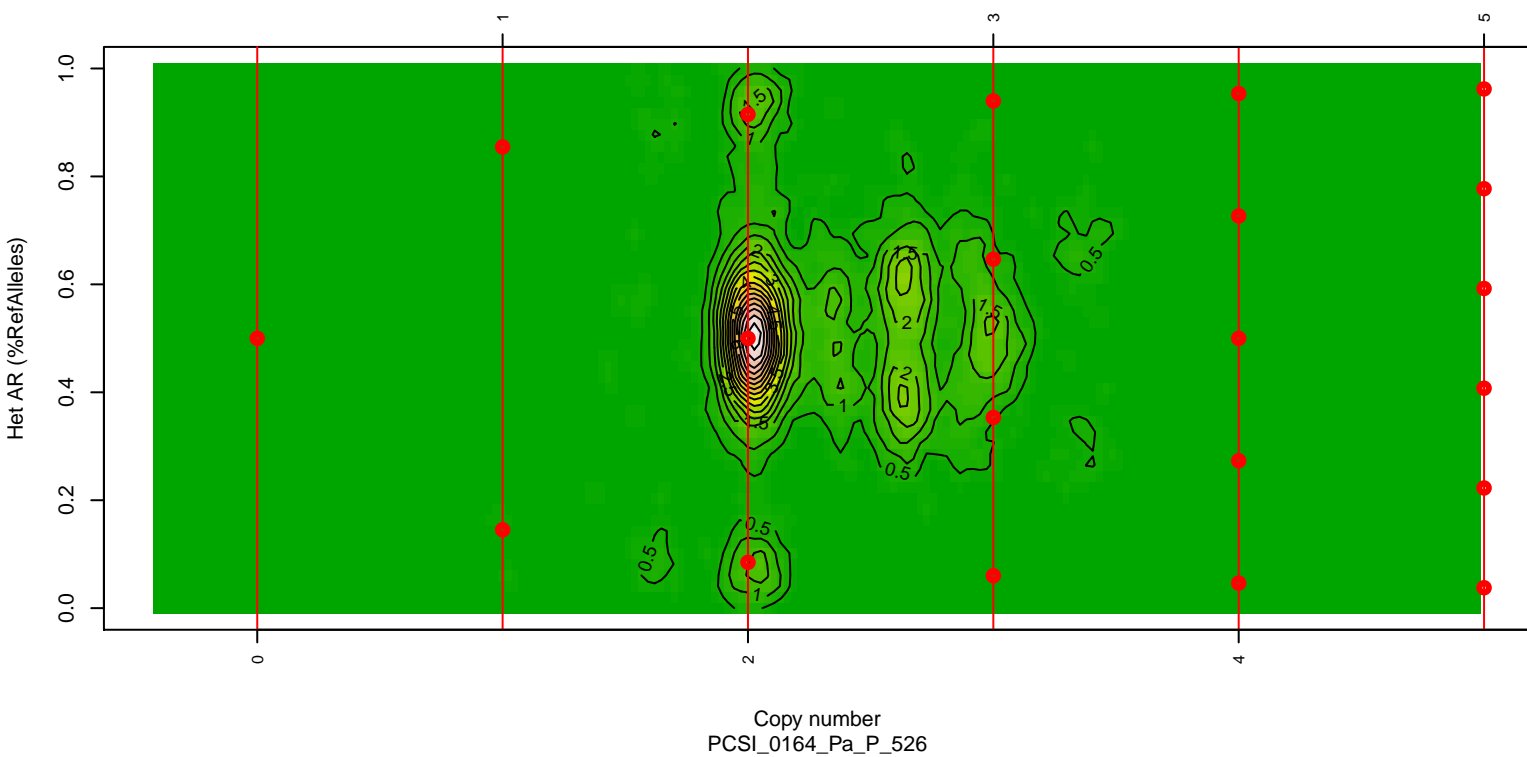

Copy number  
PCSI\_0164\_Pa\_P\_526

S:1.07, PLOIDY:1.856, %N:0.089, %T1:0.911

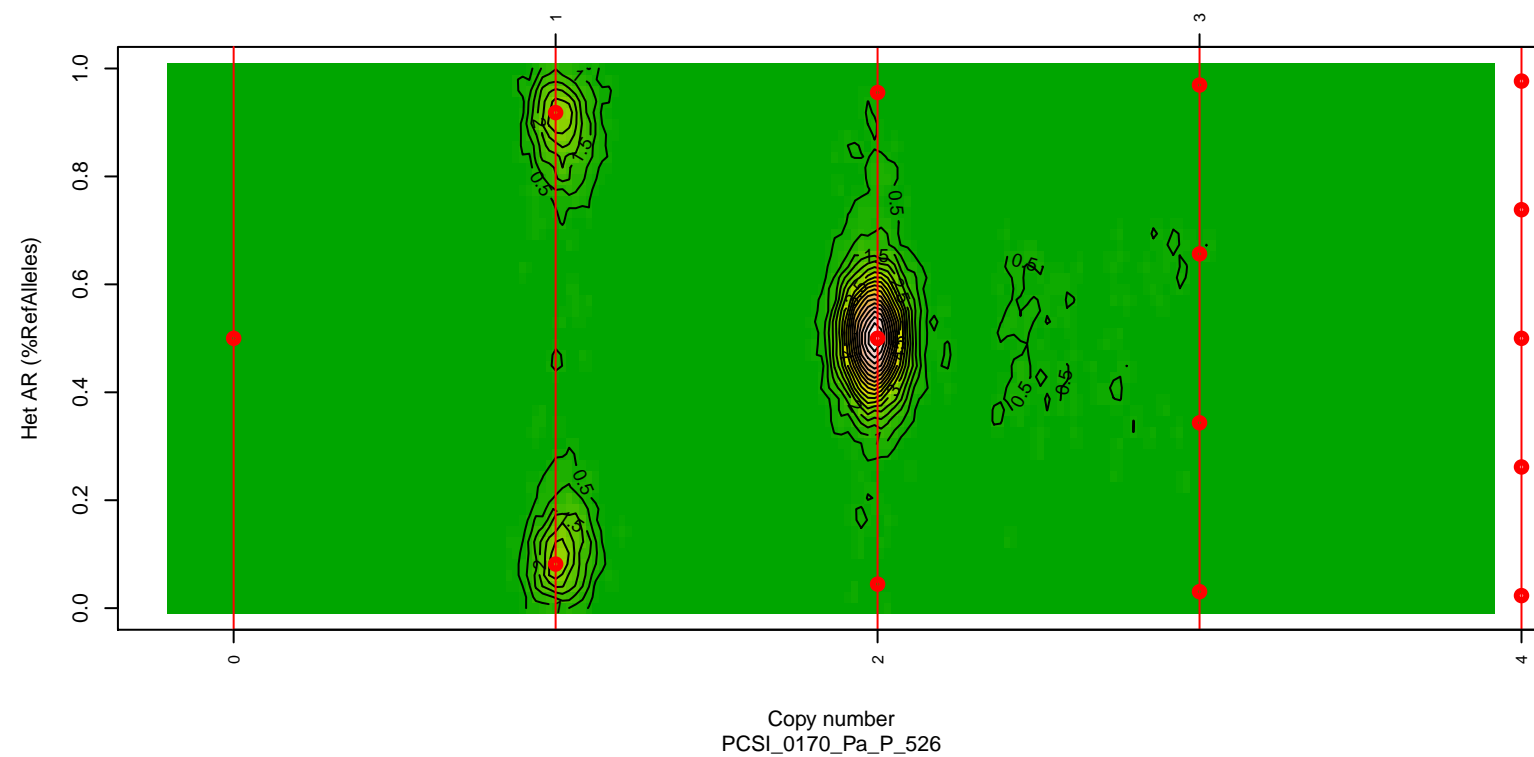

Copy number  
PCSI\_0170\_Pa\_P\_526

S:0.99, PLOIDY:2.021, %N:0.096, %T1:0.904

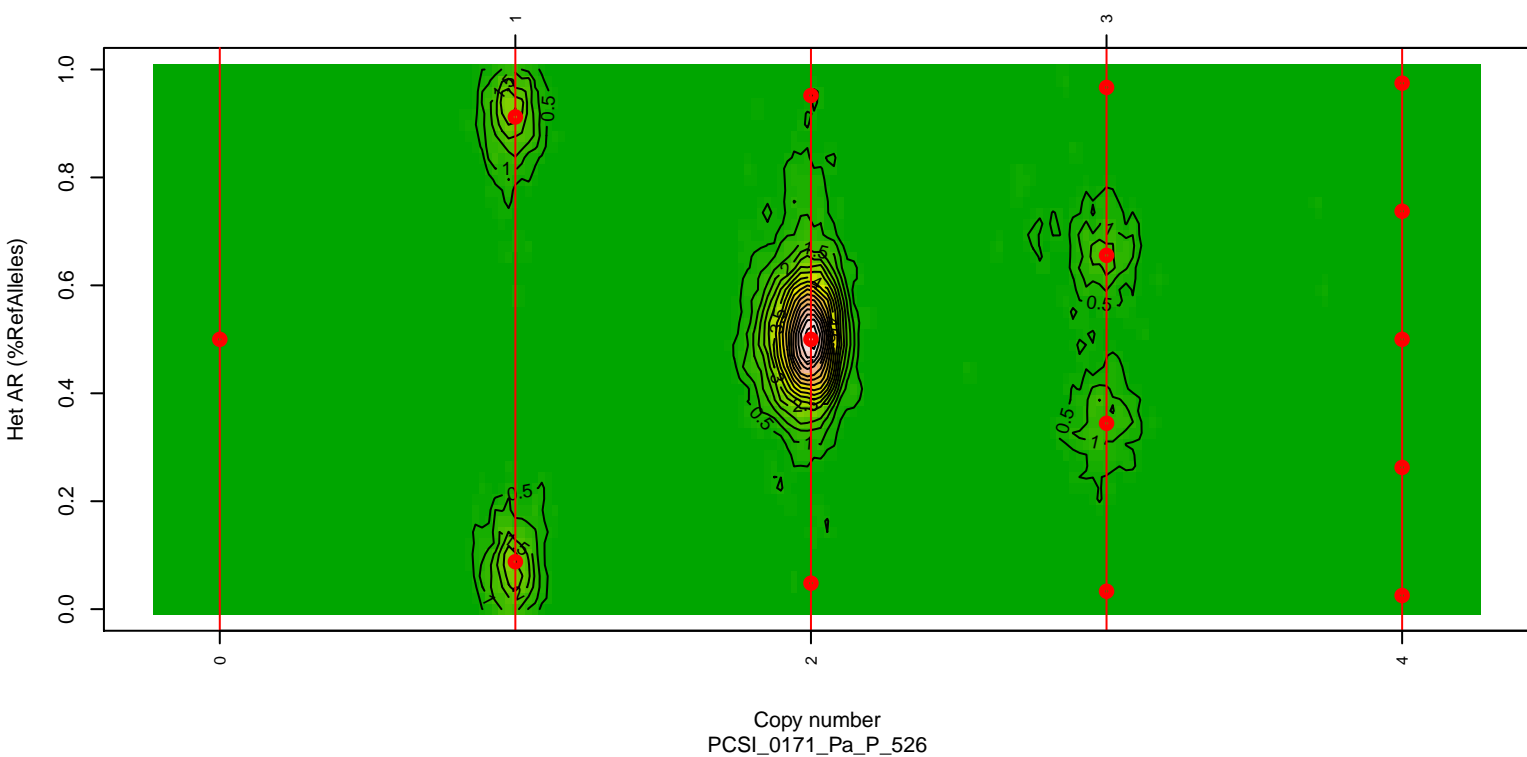

Copy number  
PCSI\_0171\_Pa\_P\_526

S:0.597, PLOIDY:3.704, %N:0.208, %T1:0.792

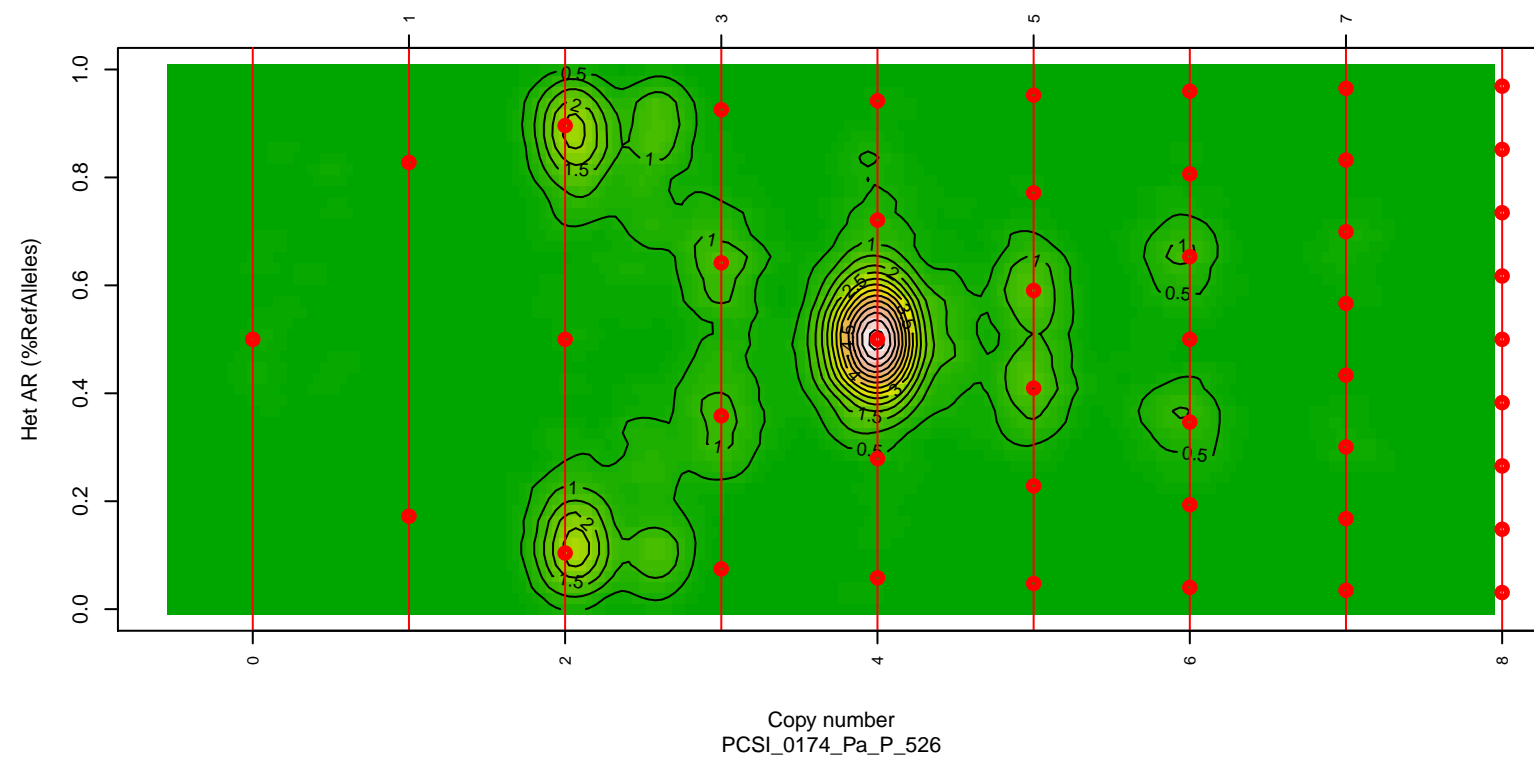

Copy number  
PCSI\_0174\_Pa\_P\_526

S:1.096, PLOIDY:1.788, %N:0.175, %T1:0.825

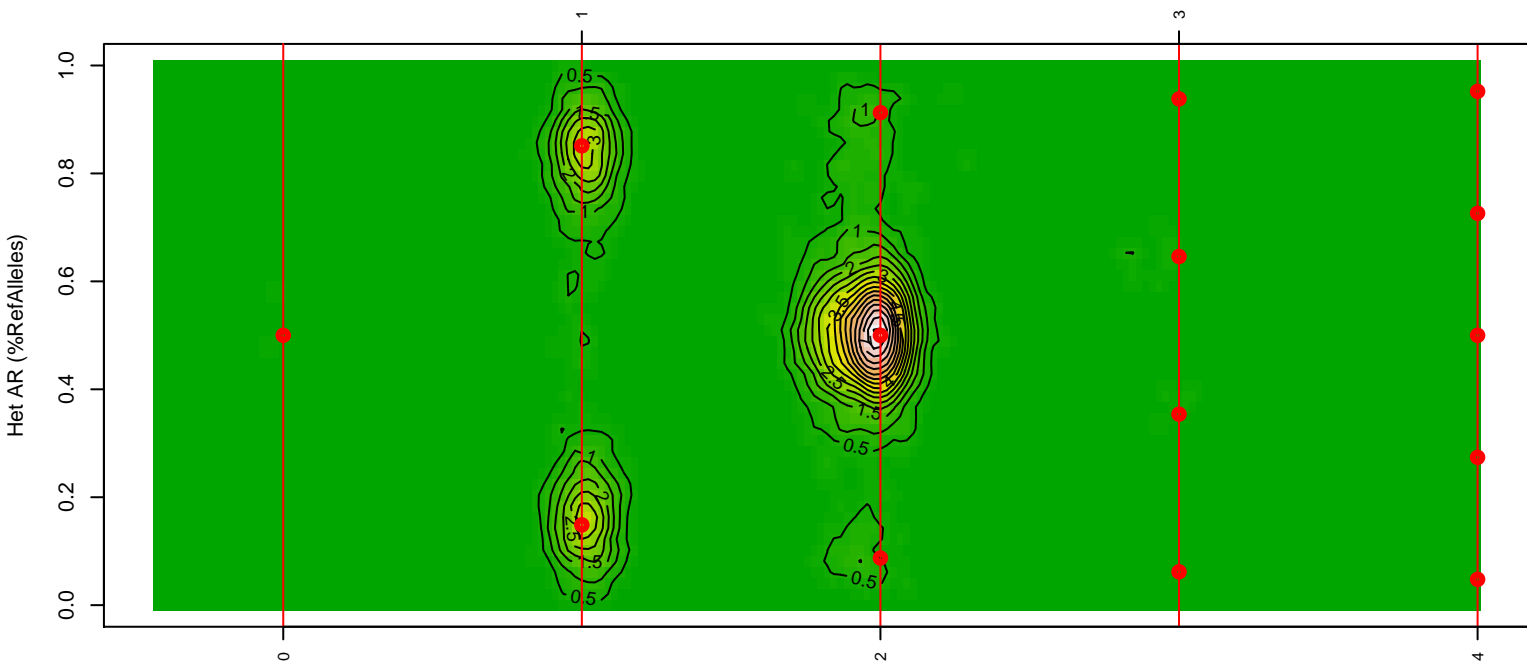

Copy number  
PCSI\_0175\_Pa\_P\_526

S:0.601, PLOIDY:3.702, %N:0.22, %T1:0.78

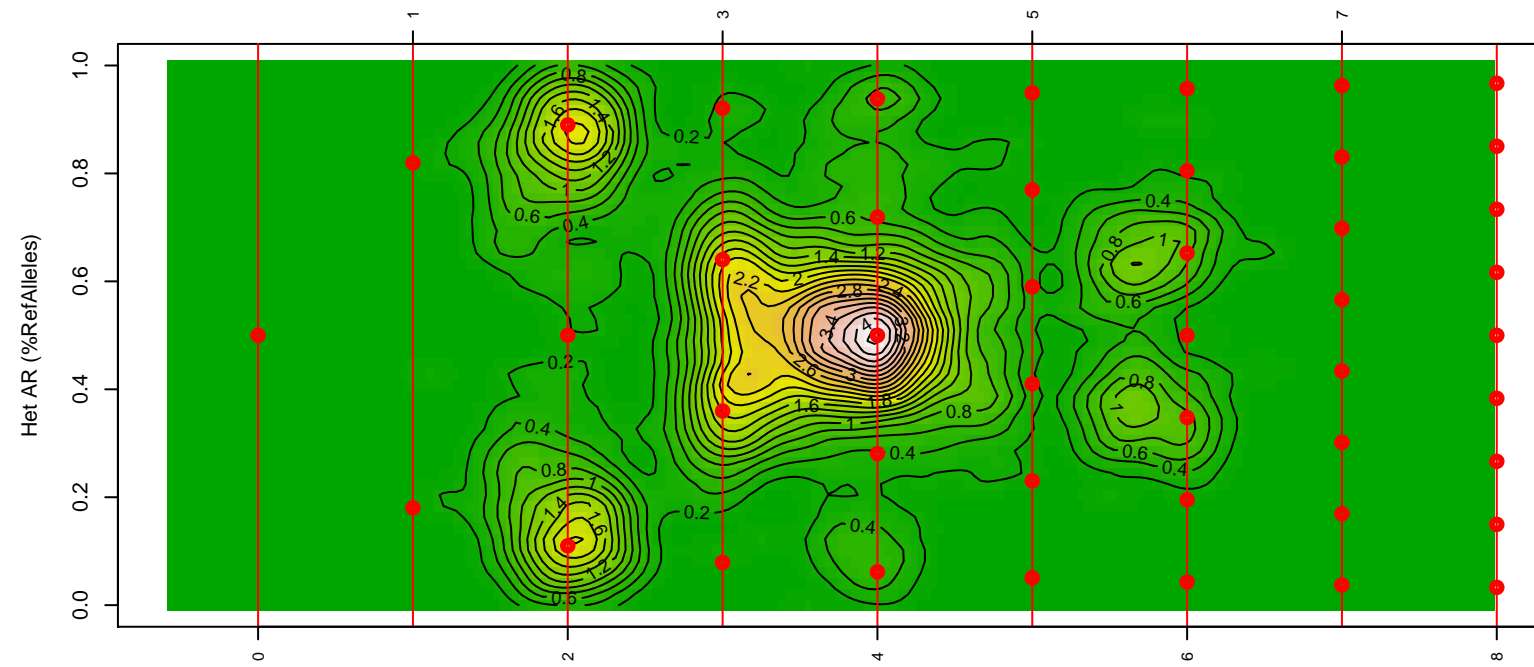

Copy number  
PCSI\_0210\_Pa\_P\_526

S:0.674, PLOIDY:3.254, %N:0.229, %T1:0.771

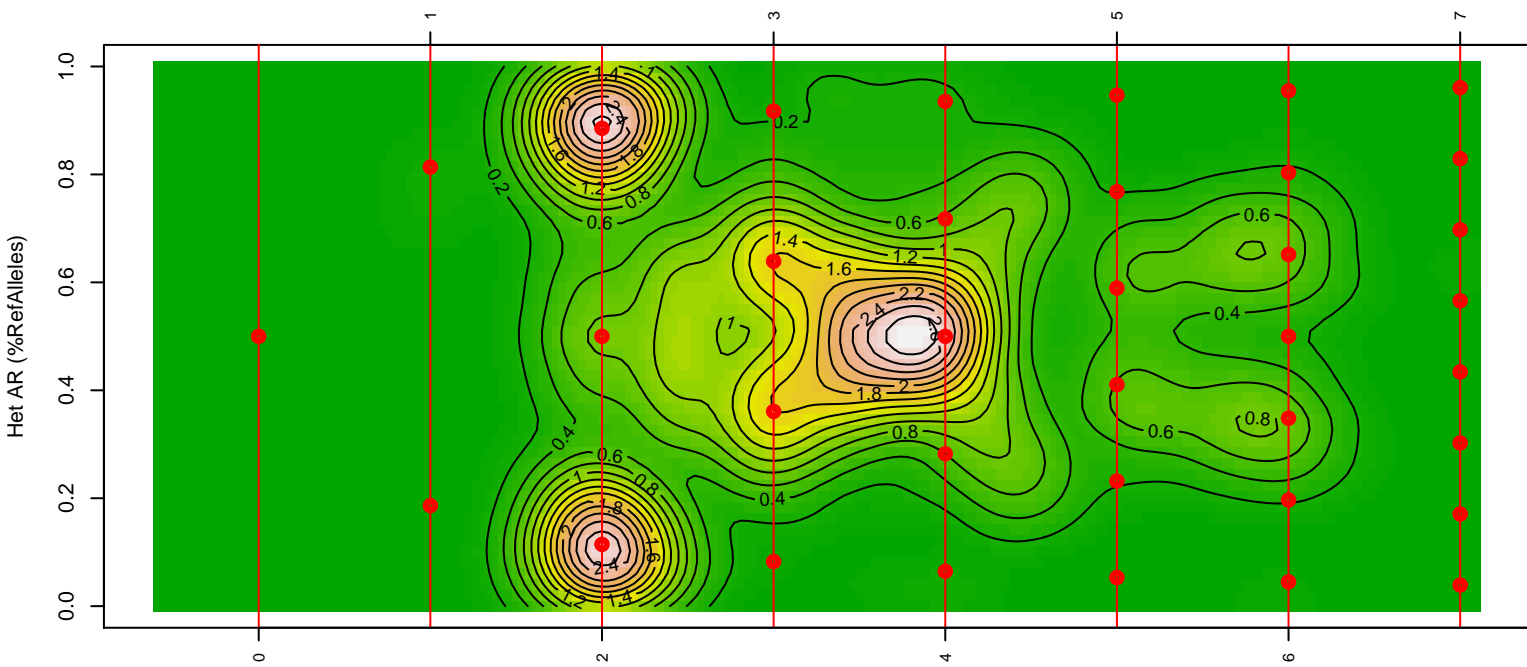

Copy number  
PCSI\_0217\_Pa\_P\_526

S:1.012, PLOIDY:1.963, %N:0.338, %T1:0.662

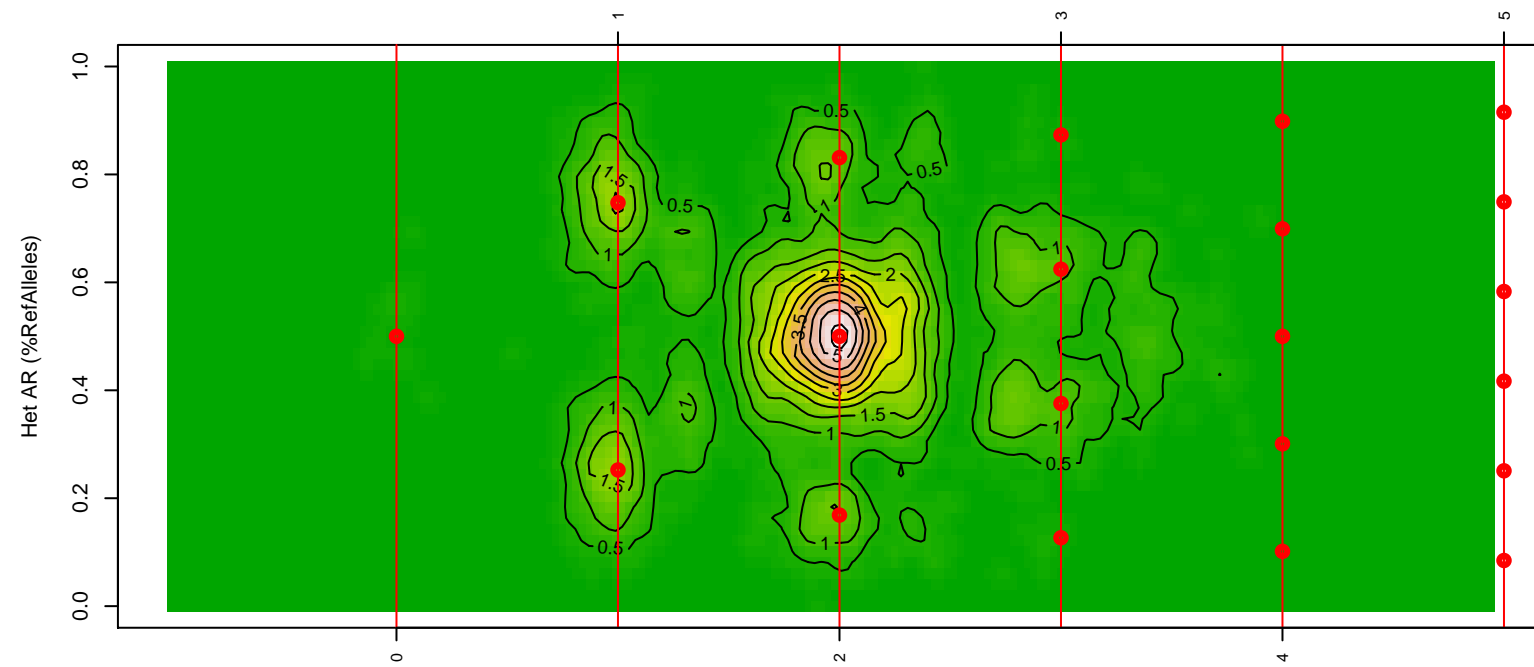

Copy number  
PCSI\_0218\_Pa\_P\_526

S:0.716, PLOIDY:2.99, %N:0.199, %T1:0.801

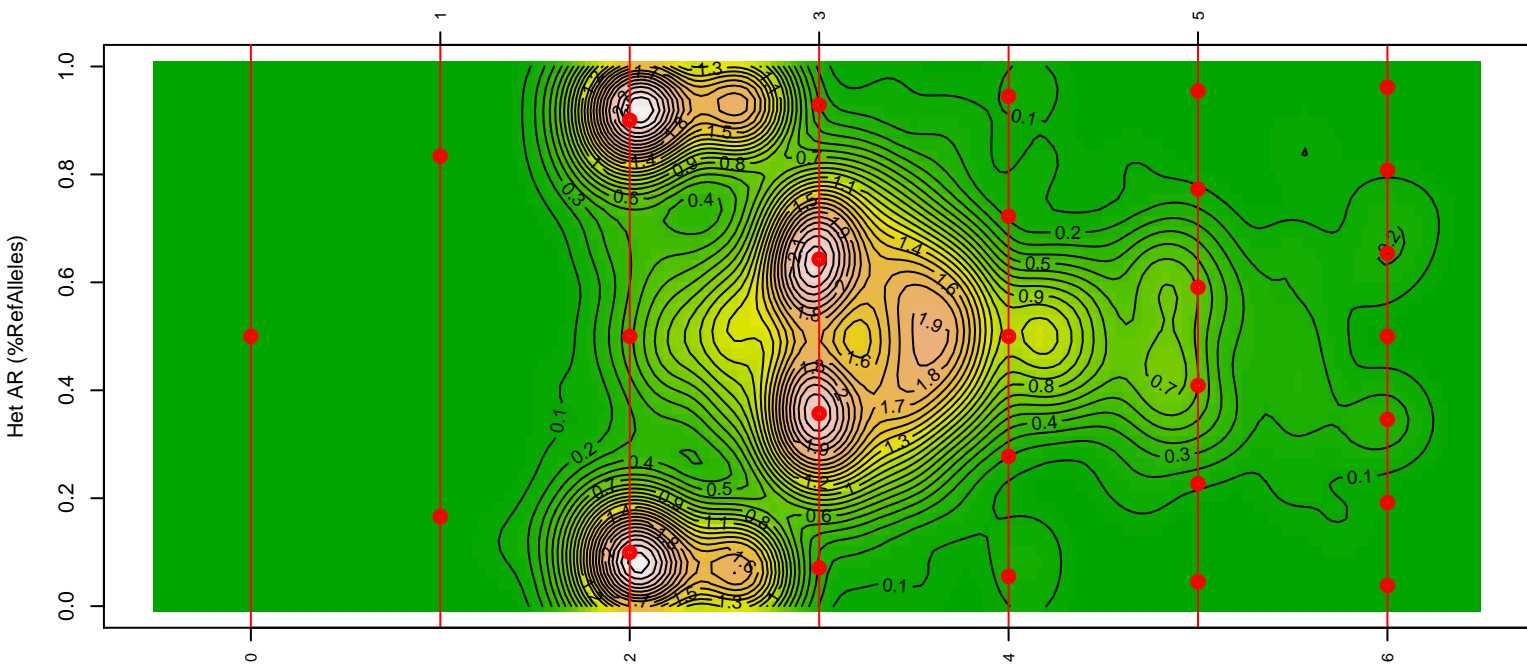

Copy number  
PCSI\_0226\_Pa\_P\_526

S:1.014, PLOIDY:1.97, %N:0.057, %T1:0.943

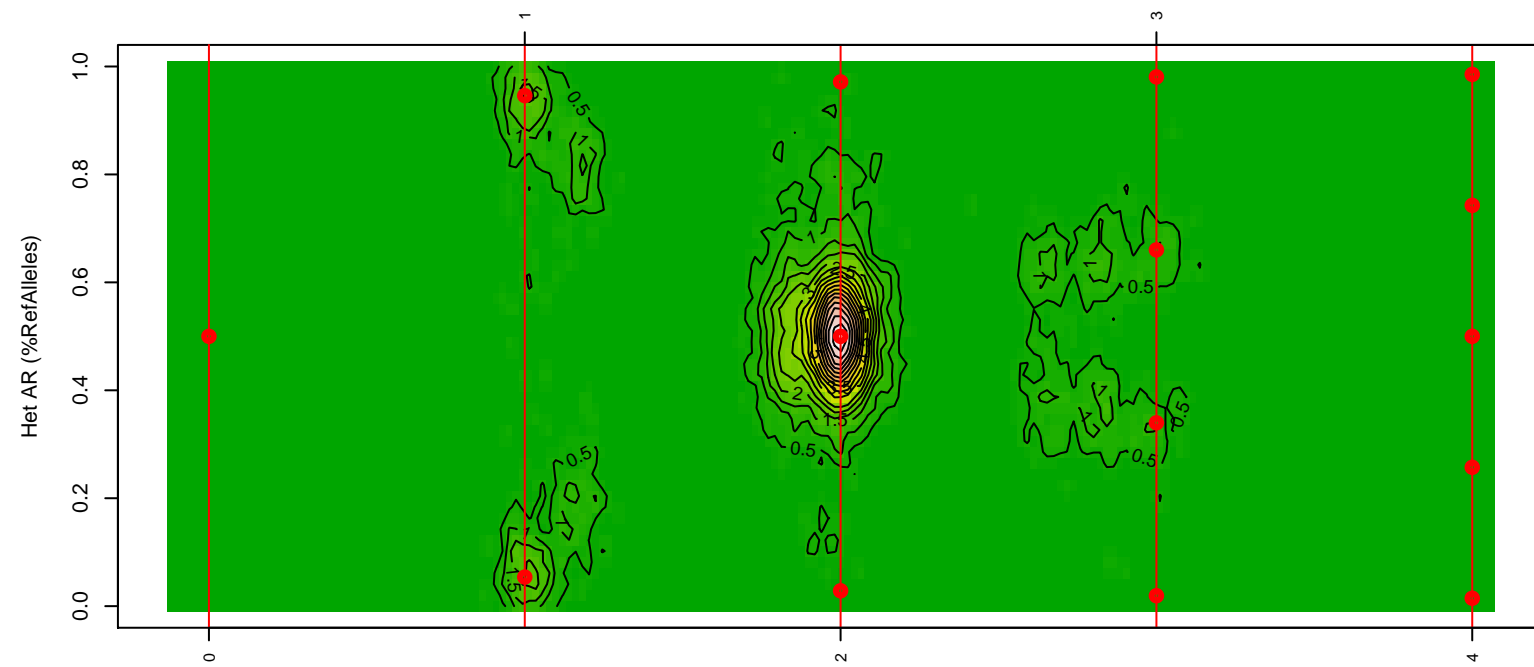

Copy number  
PCSI\_0227\_Pa\_P\_526

S:0.568, PLOIDY:4.726, %N:0.442, %T1:0.558

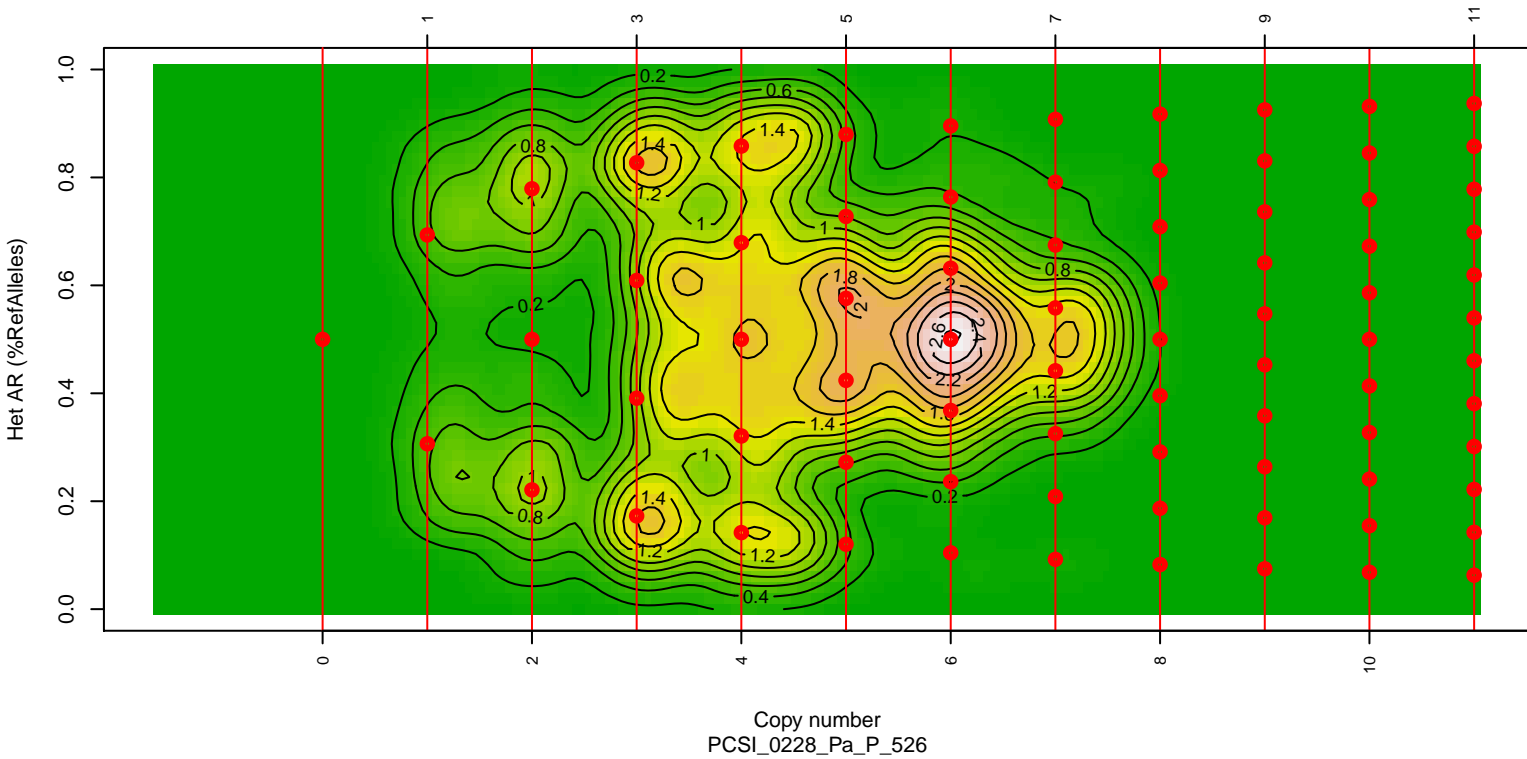

Copy number  
PCSI\_0228\_Pa\_P\_526

S:0.588, PLOIDY:3.67, %N:0.161, %T1:0.839

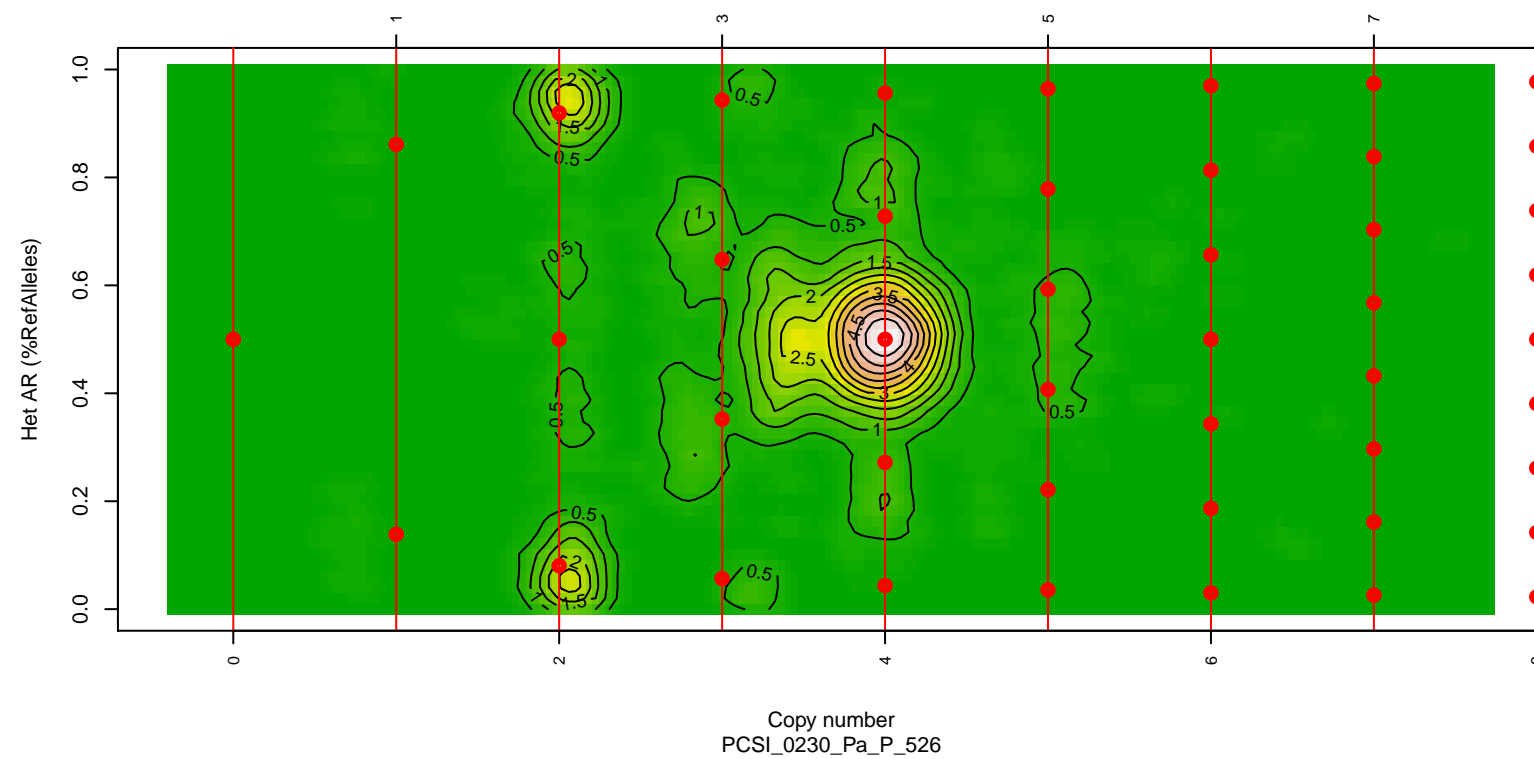

Copy number  
PCSI\_0230\_Pa\_P\_526

S:1.136, PLOIDY:1.71, %N:0.174, %T1:0.826

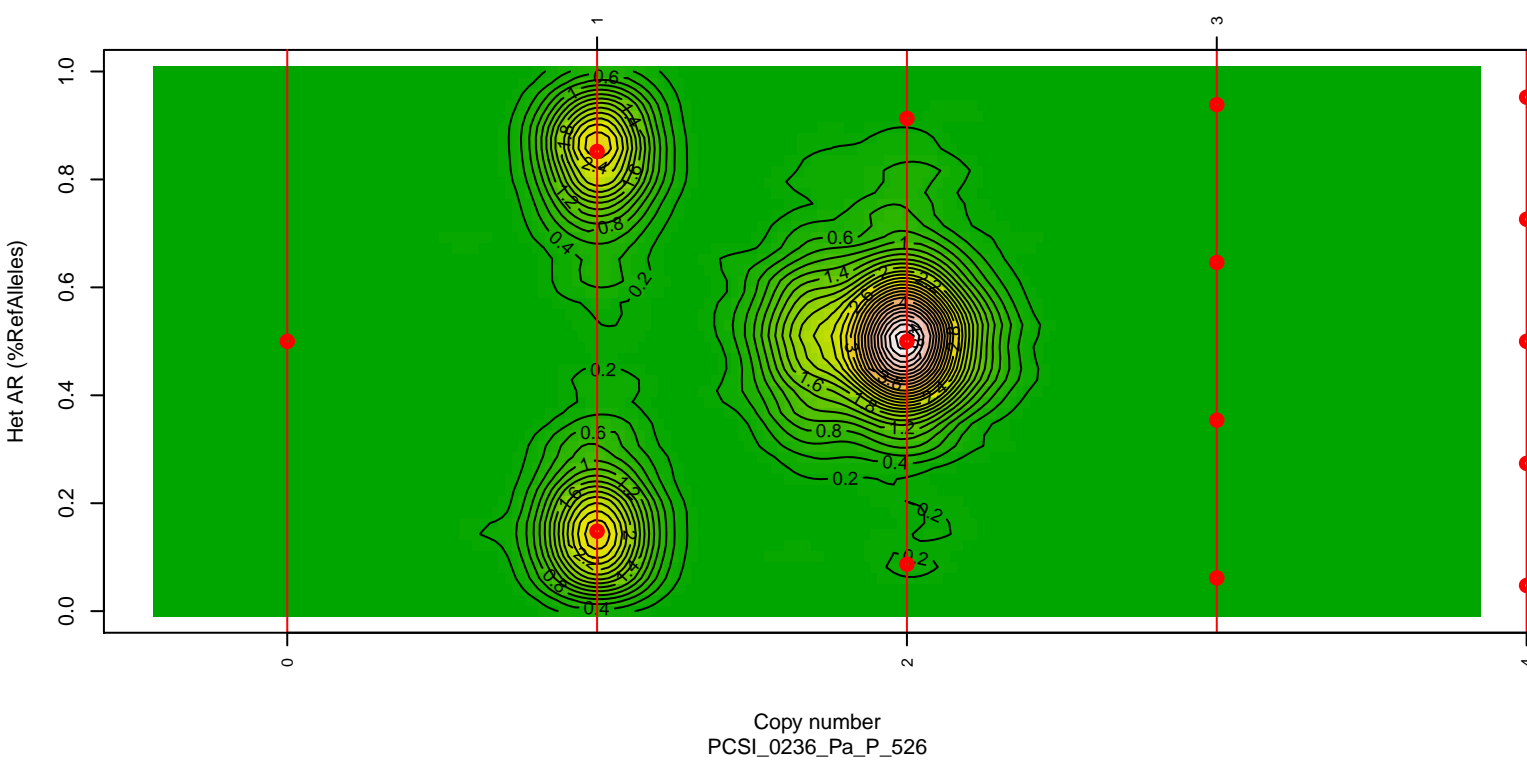

Copy number  
PCSI\_0236\_Pa\_P\_526

S:1.062, PLOIDY:1.856, %N:0.18, %T1:0.82

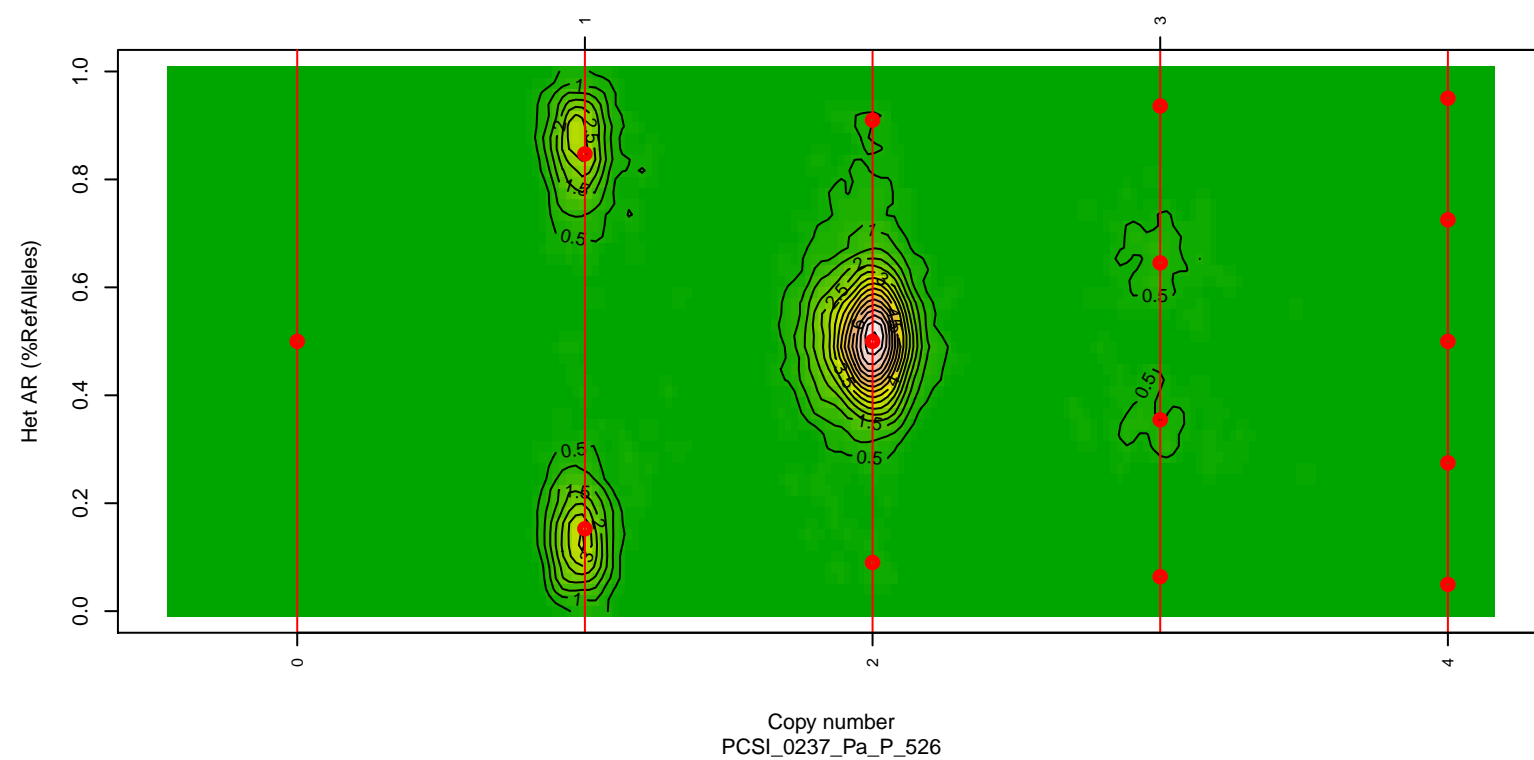

Copy number  
PCSI\_0237\_Pa\_P\_526

S:0.985, PLOIDY:2.048, %N:0.367, %T1:0.633

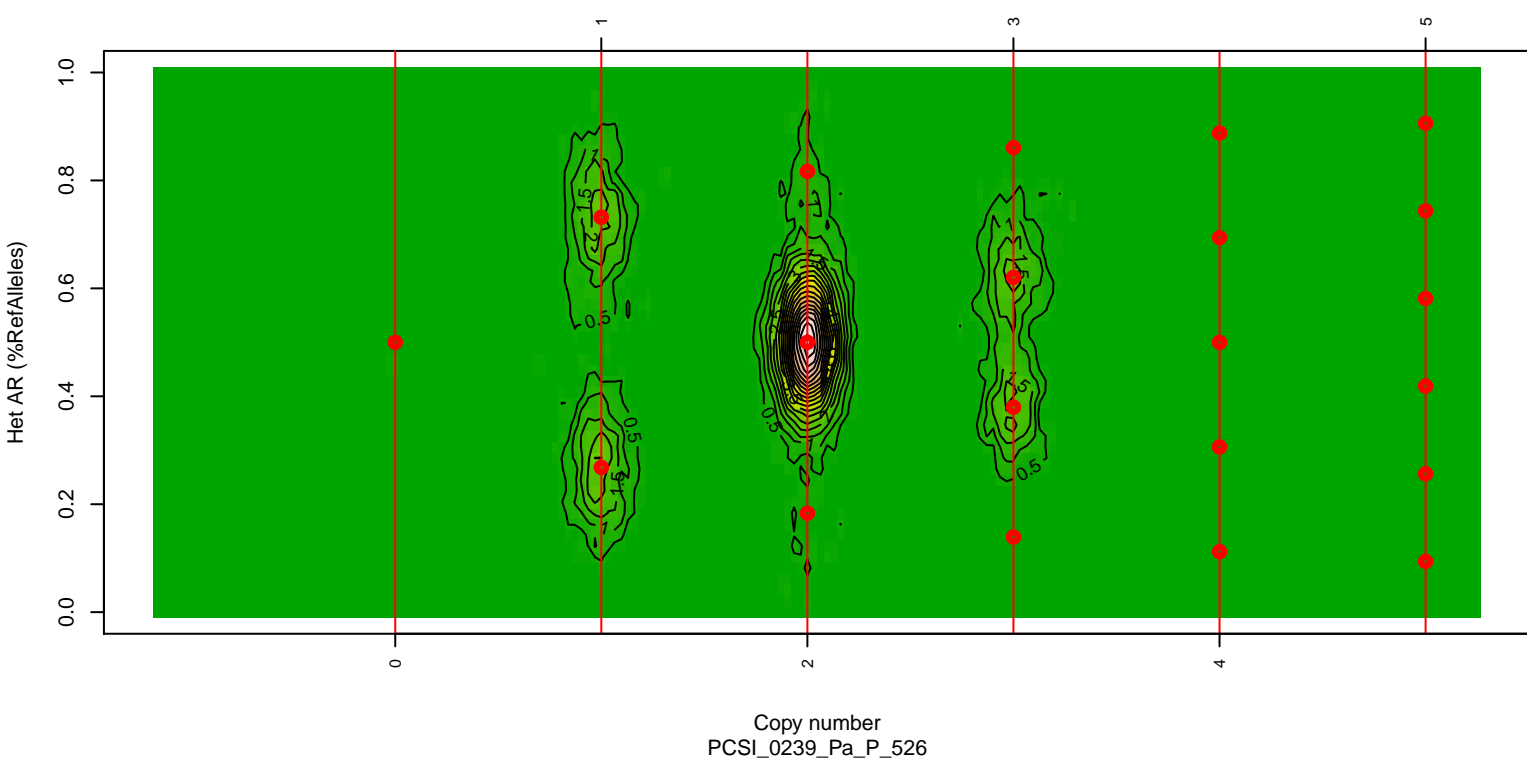

Copy number  
PCSI\_0239\_Pa\_P\_526

S:0.646, PLOIDY:3.622, %N:0.324, %T1:0.676

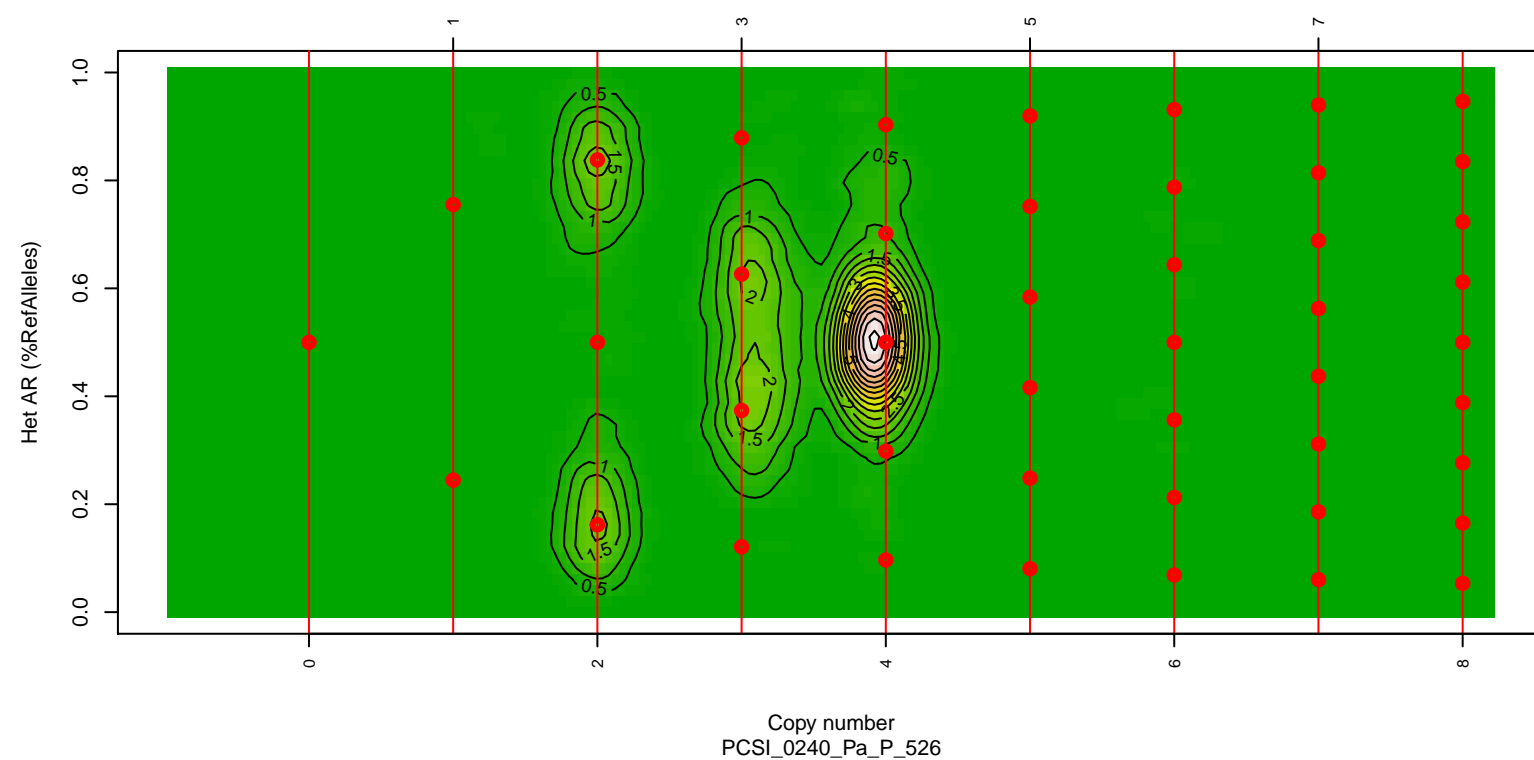

Copy number  
PCSI\_0240\_Pa\_P\_526



S:0.802, PLOIDY:2.877, %N:0.437, %T1:0.563

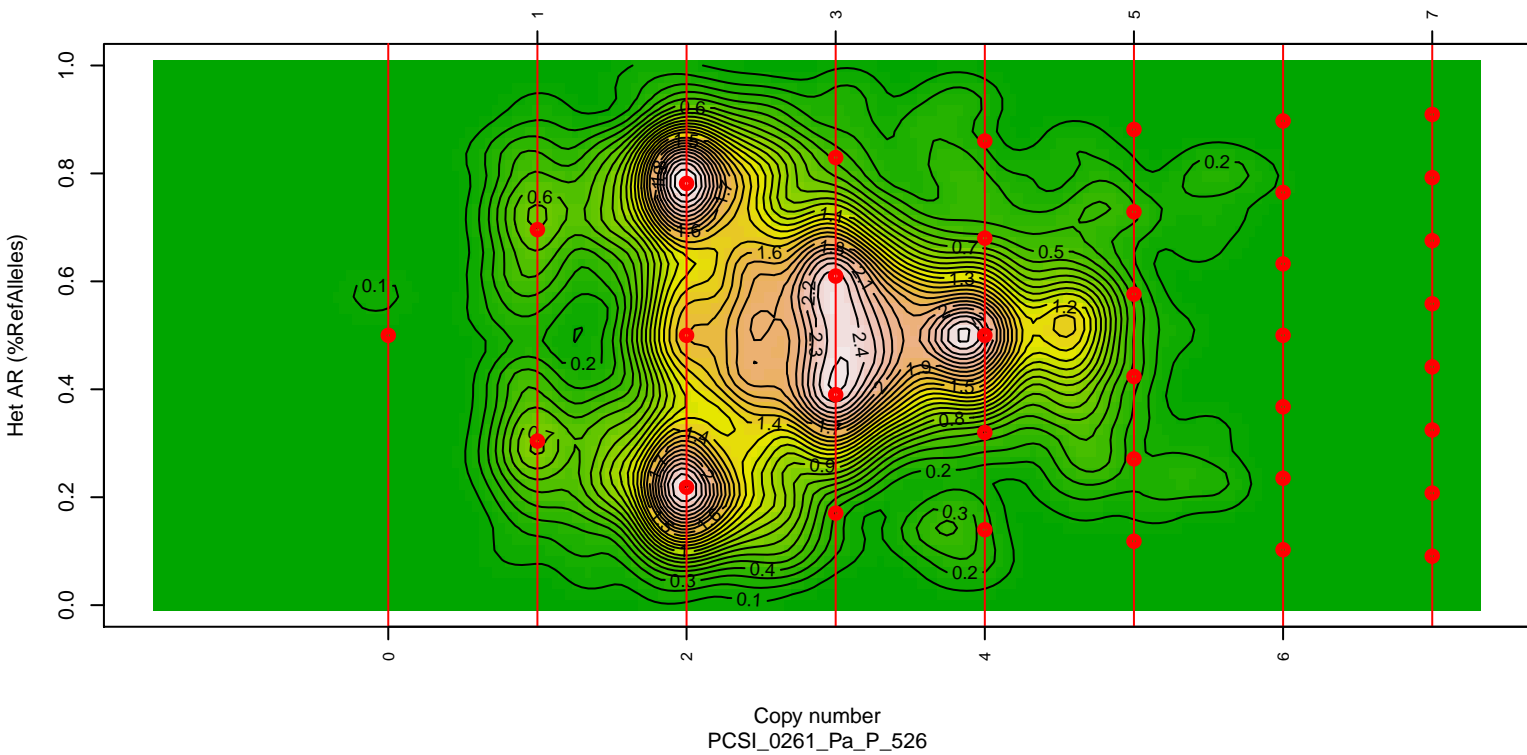

S:0.976, PLOIDY:2.08, %N:0.384, %T1:0.616

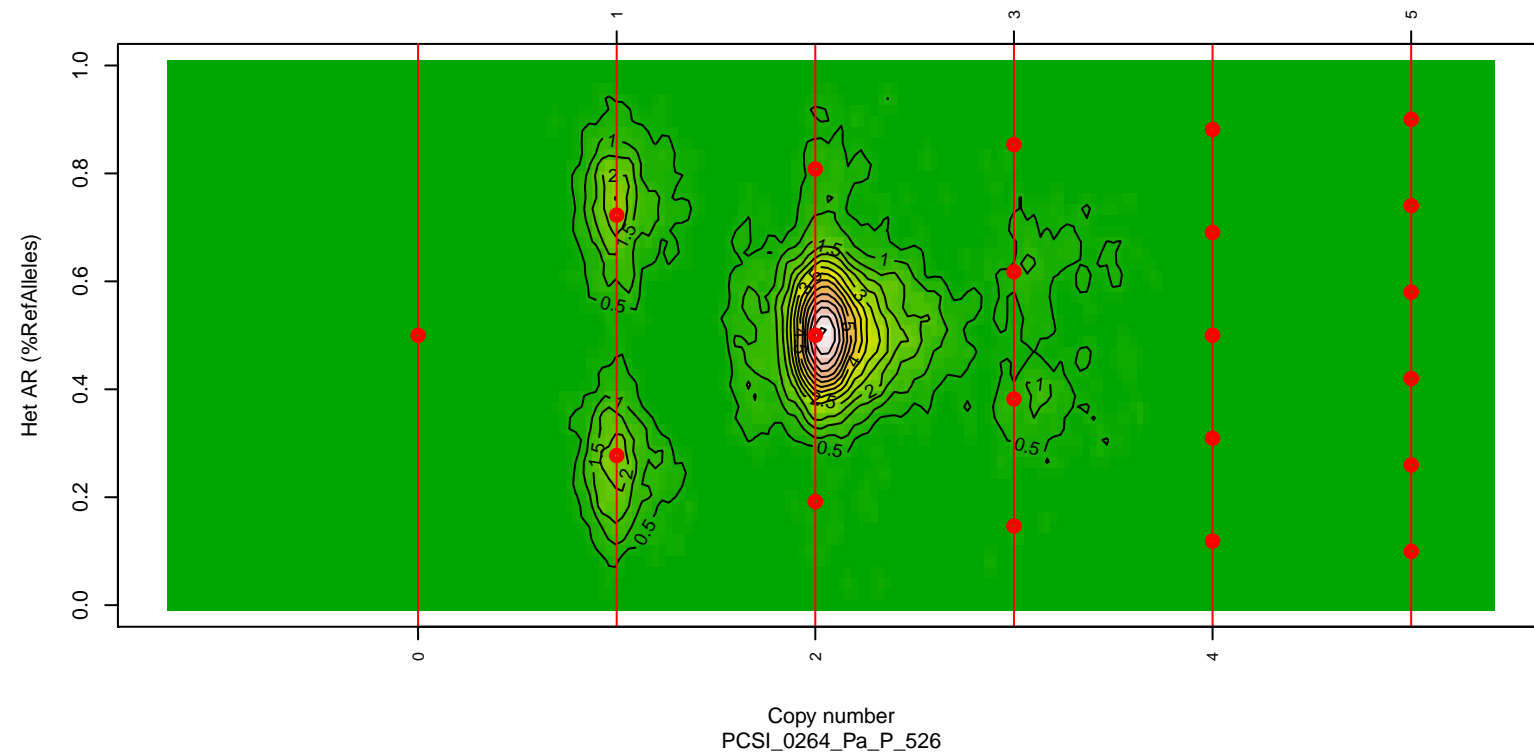

S:0.718, PLOIDY:3.586, %N:0.505, %T1:0.495

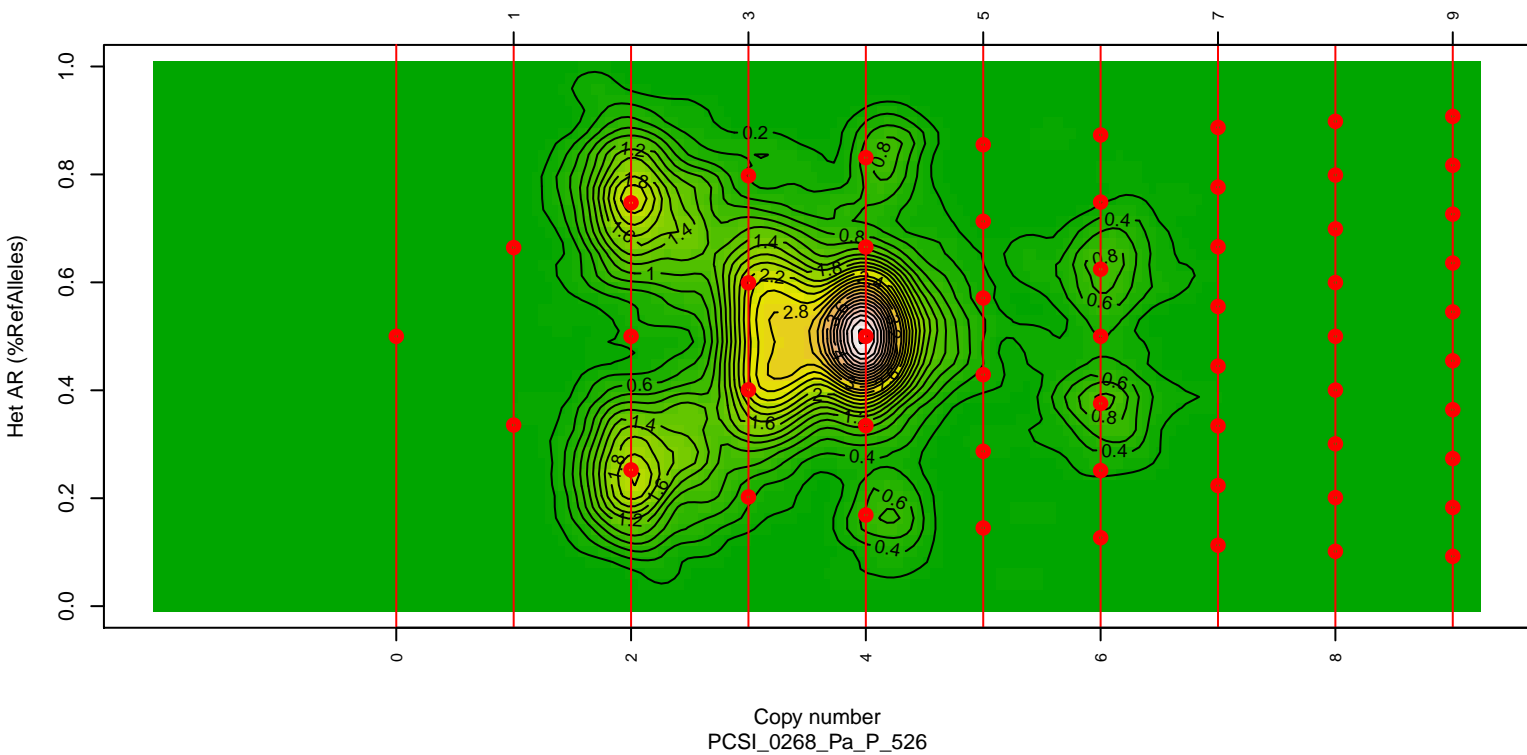

S:1.039, PLOIDY:1.881, %N:0.369, %T1:0.631

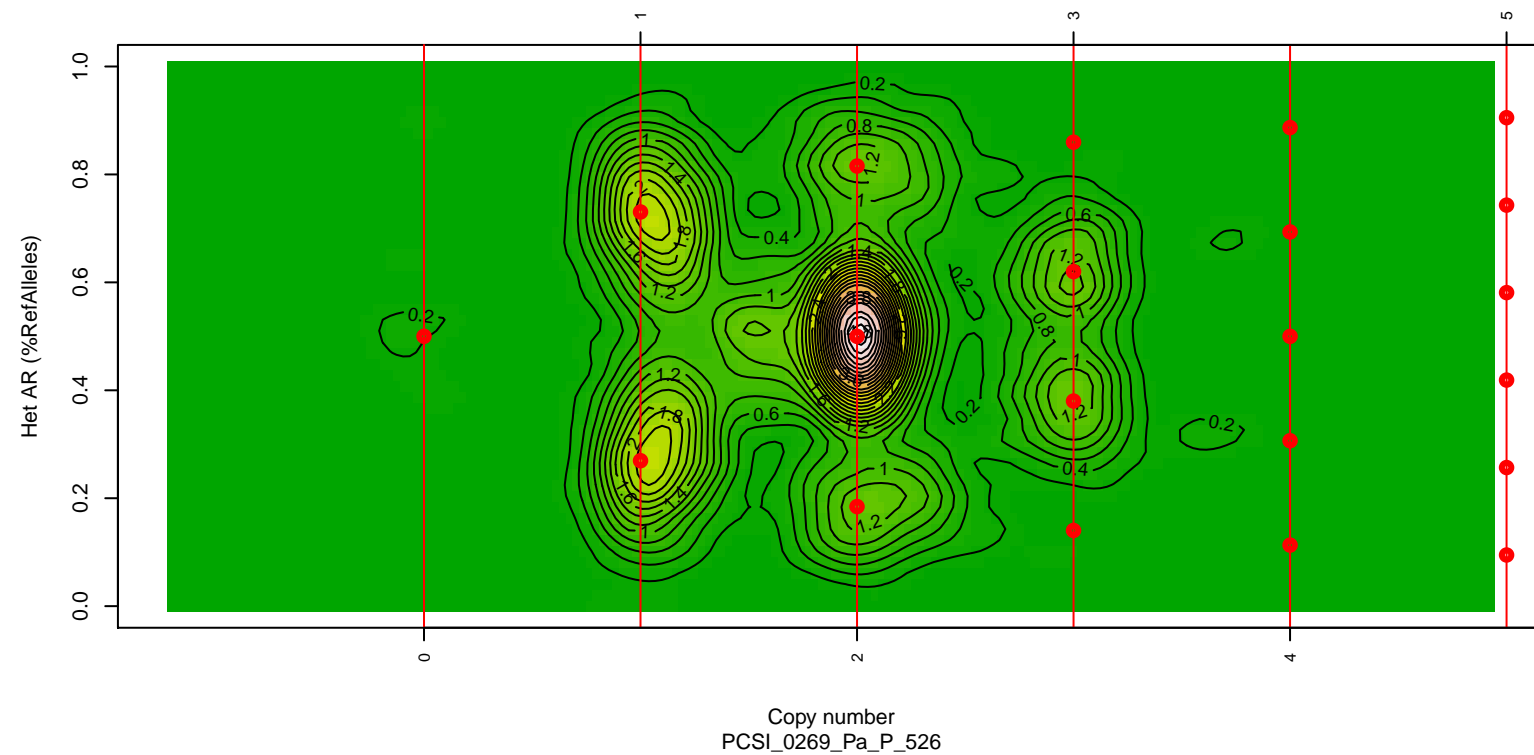

S:0.722, PLOIDY:3.273, %N:0.395, %T1:0.605

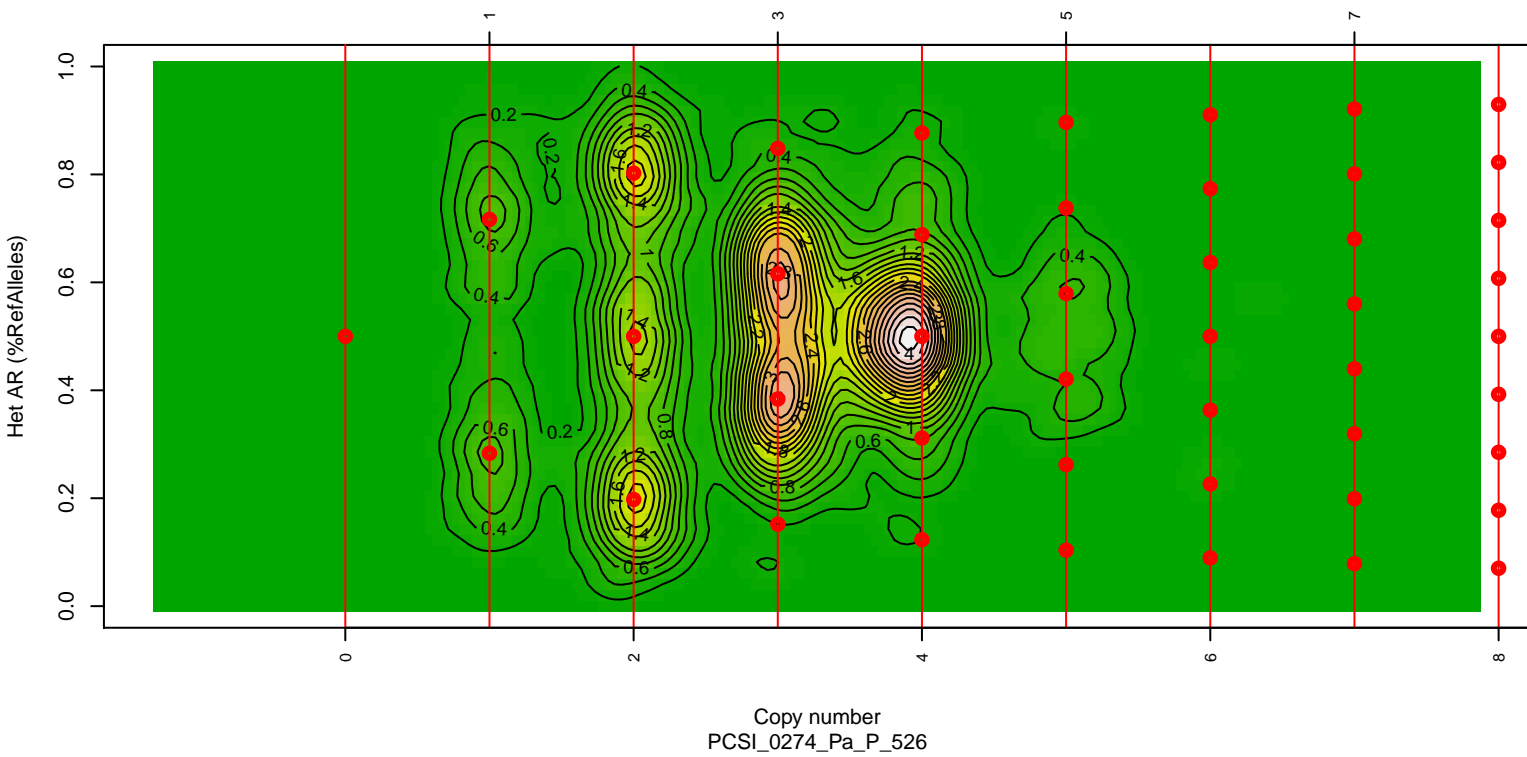

S:0.993, PLOIDY:2.023, %N:0.392, %T1:0.608

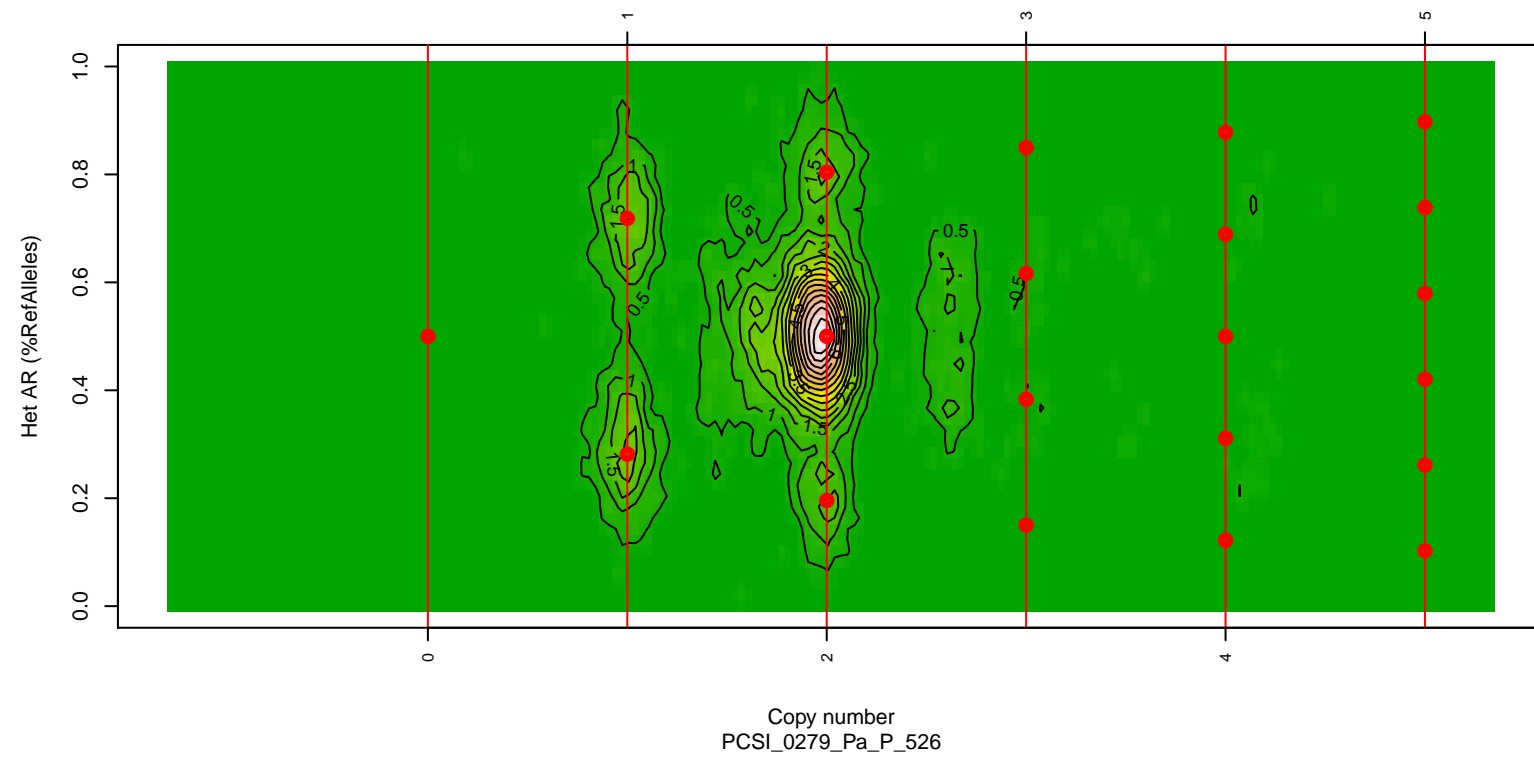

S:1.038, PLOIDY:1.925, %N:0.022, %T1:0.978

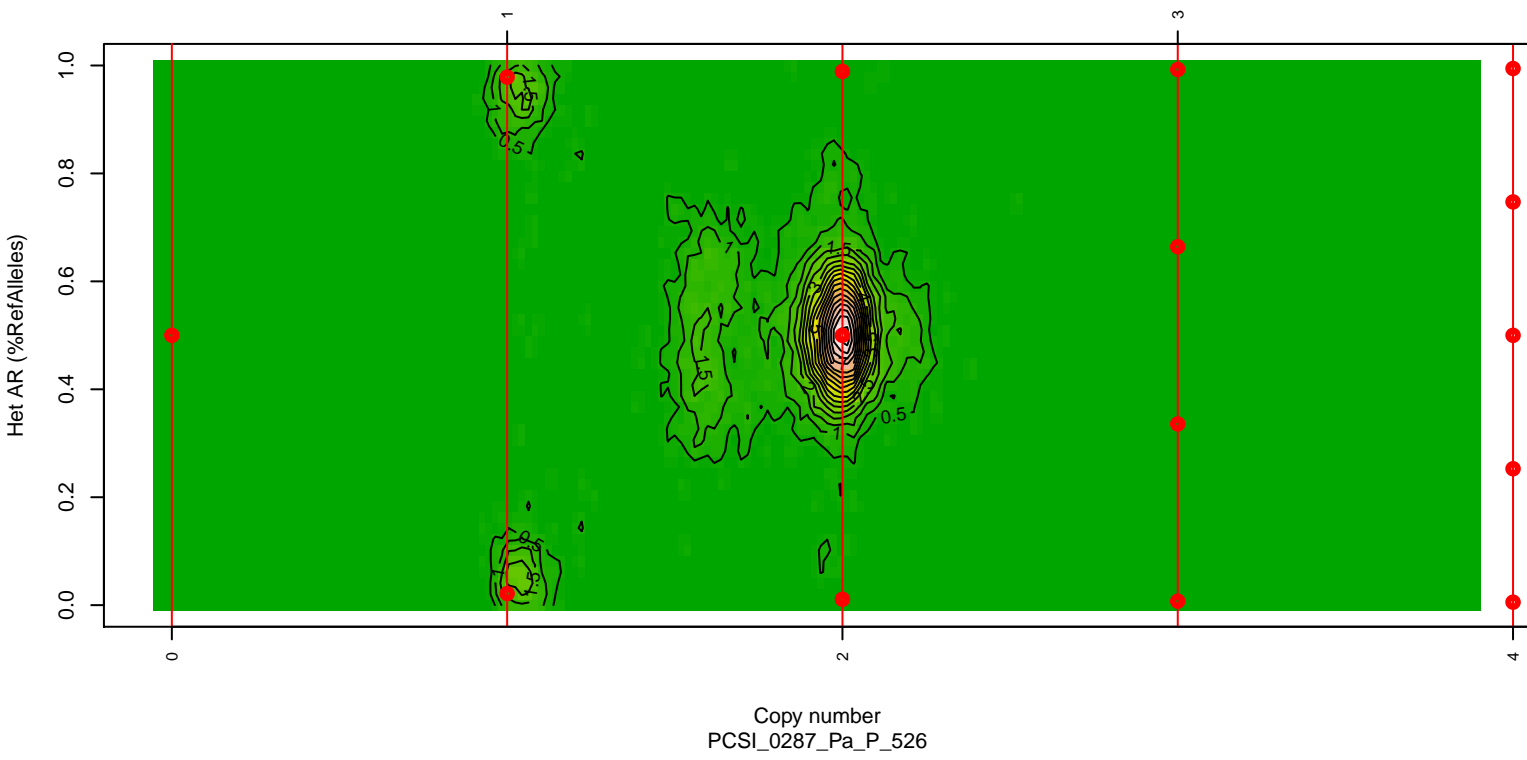

Copy number  
PCSI\_0287\_Pa\_P\_526

S:0.671, PLOIDY:3.416, %N:0.309, %T1:0.691

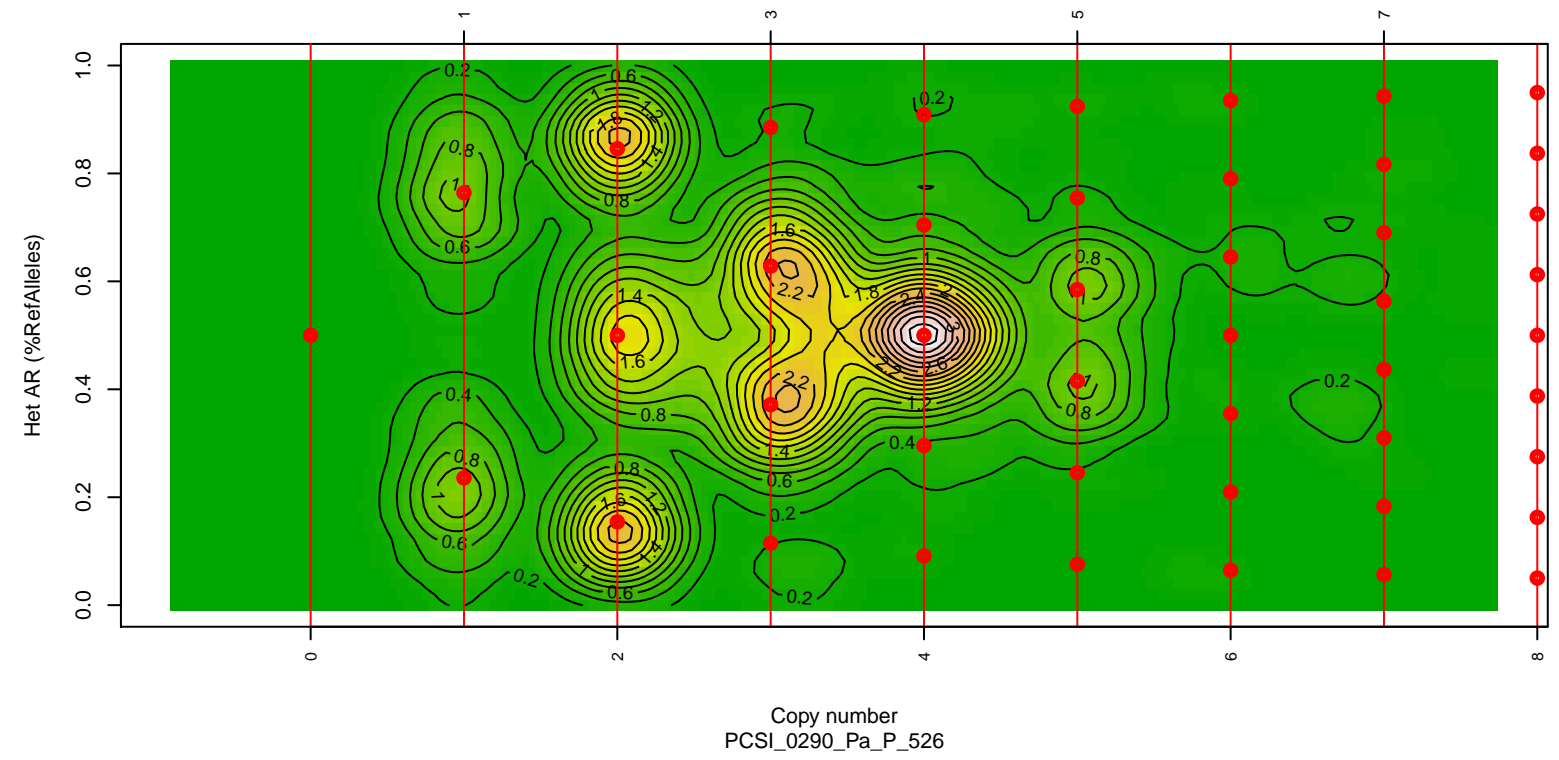

Copy number  
PCSI\_0290\_Pa\_P\_526

S:1.017, PLOIDY:1.953, %N:0.276, %T1:0.724

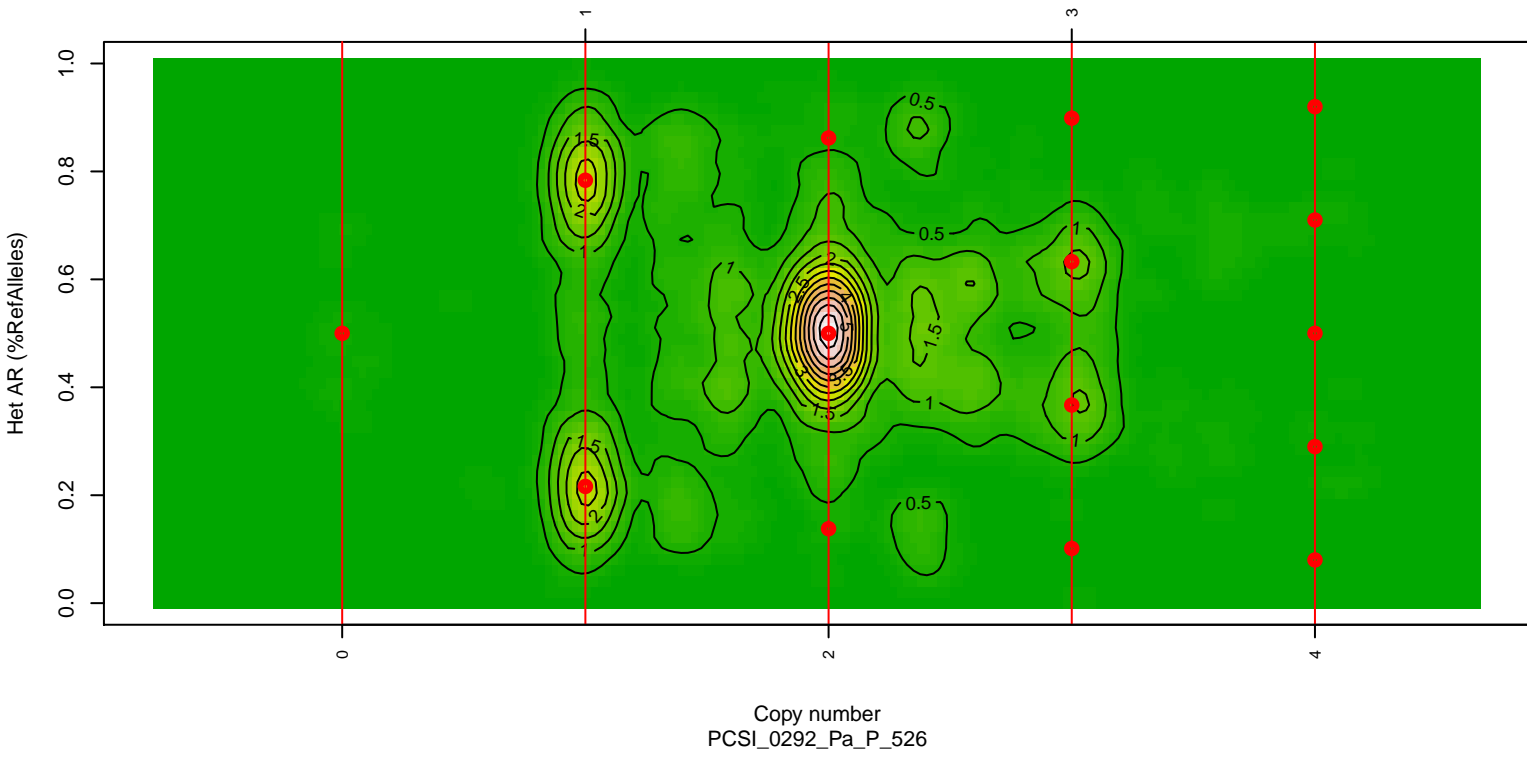

Copy number  
PCSI\_0292\_Pa\_P\_526

S:0.643, PLOIDY:3.542, %N:0.281, %T1:0.719

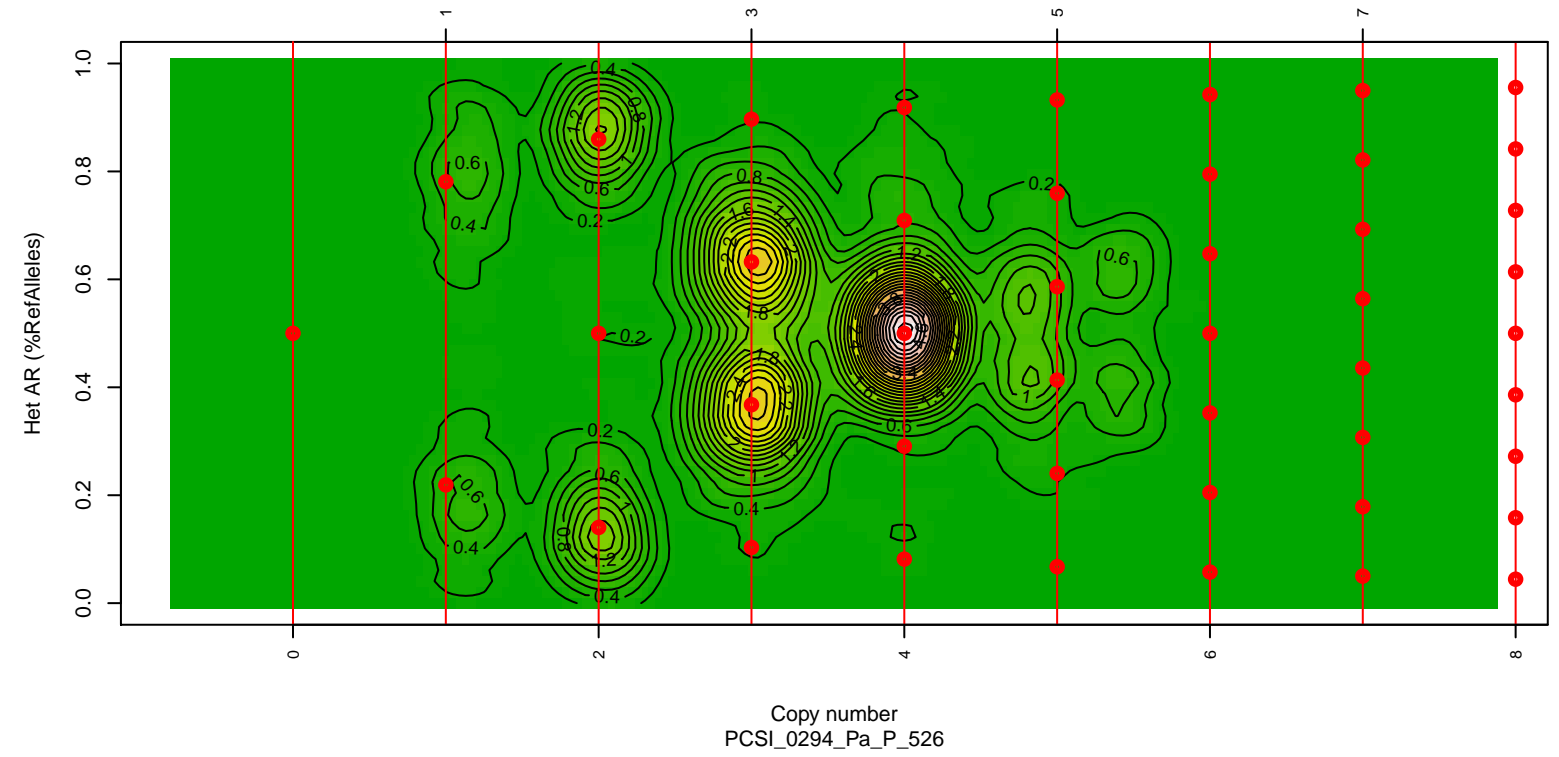

Copy number  
PCSI\_0294\_Pa\_P\_526

S:1.053, PLOIDY:1.88, %N:0.165, %T1:0.835

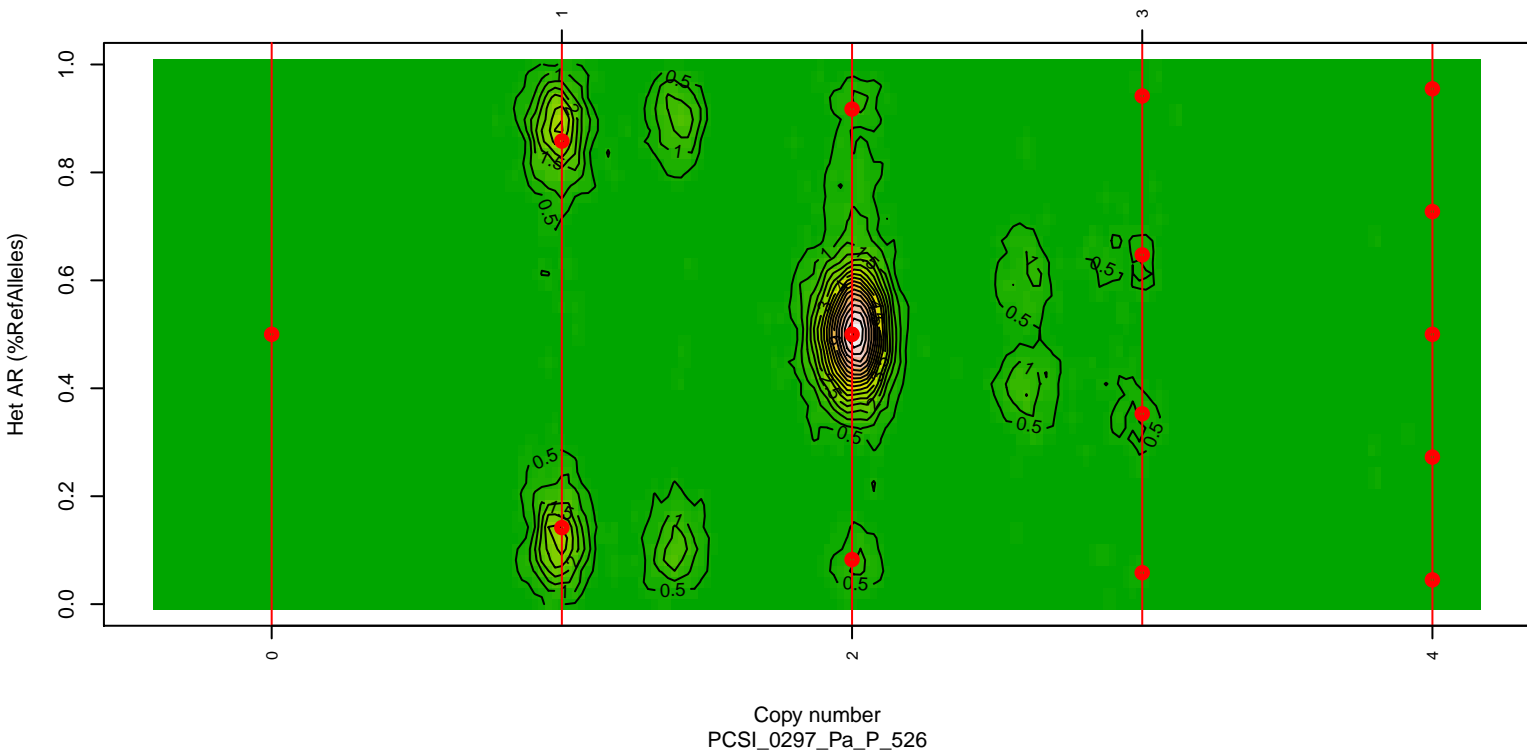

Copy number  
PCSI\_0297\_Pa\_P\_526

S:0.827, PLOIDY:2.782, %N:0.465, %T1:0.535

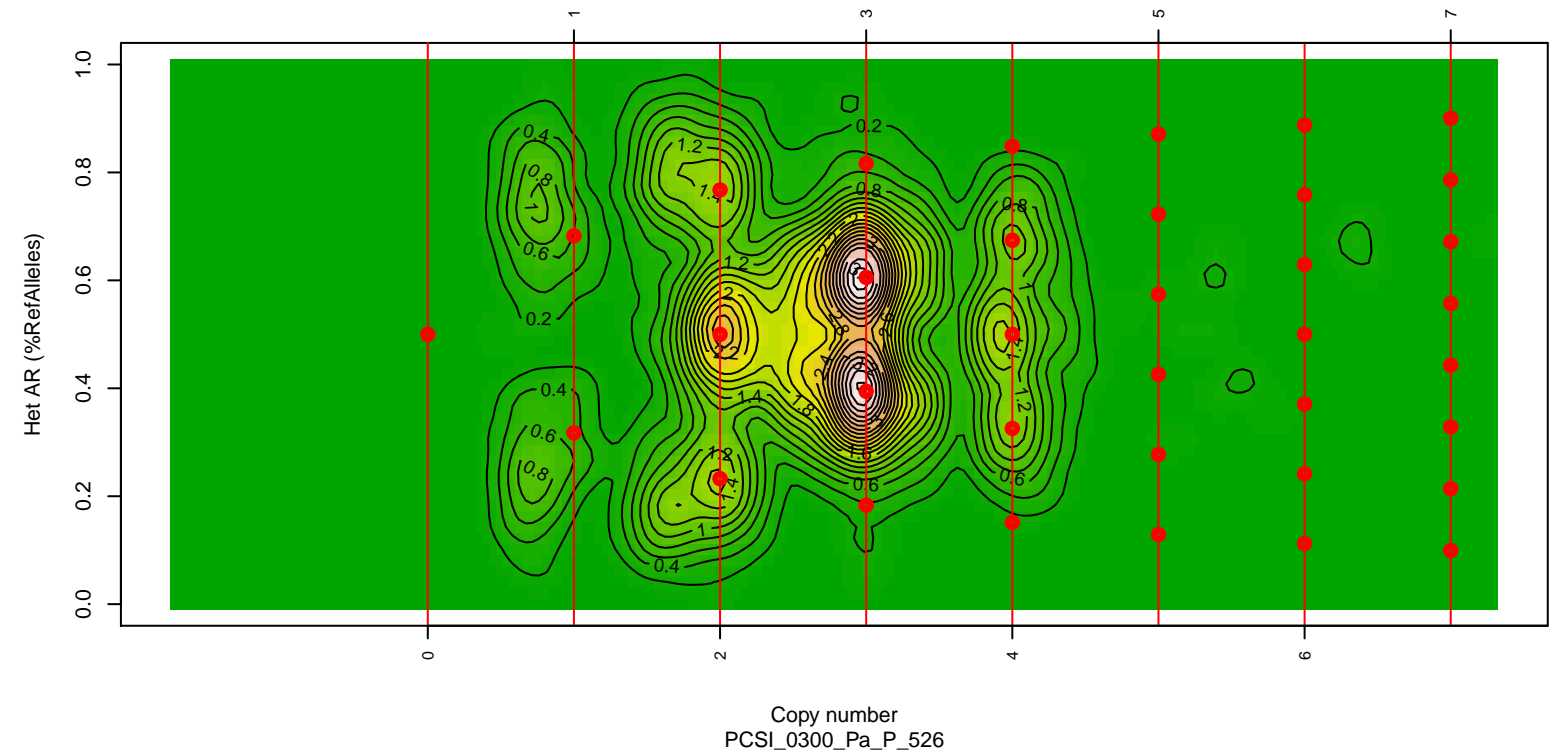

Copy number  
PCSI\_0300\_Pa\_P\_526

S:0.965, PLOIDY:2.147, %N:0.507, %T1:0.493

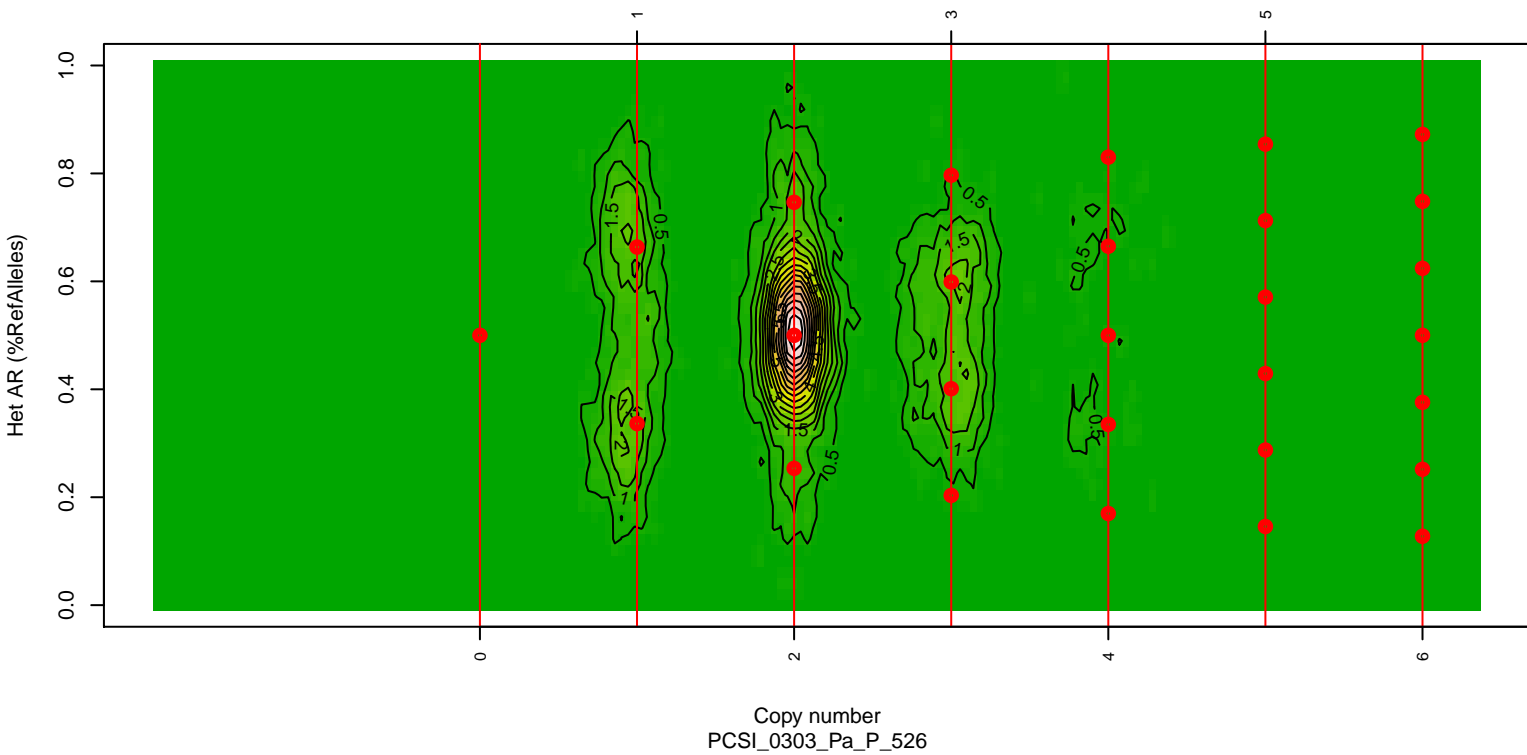

Copy number  
PCSI\_0303\_Pa\_P\_526

S:0.65, PLOIDY:3.221, %N:0.12, %T1:0.88

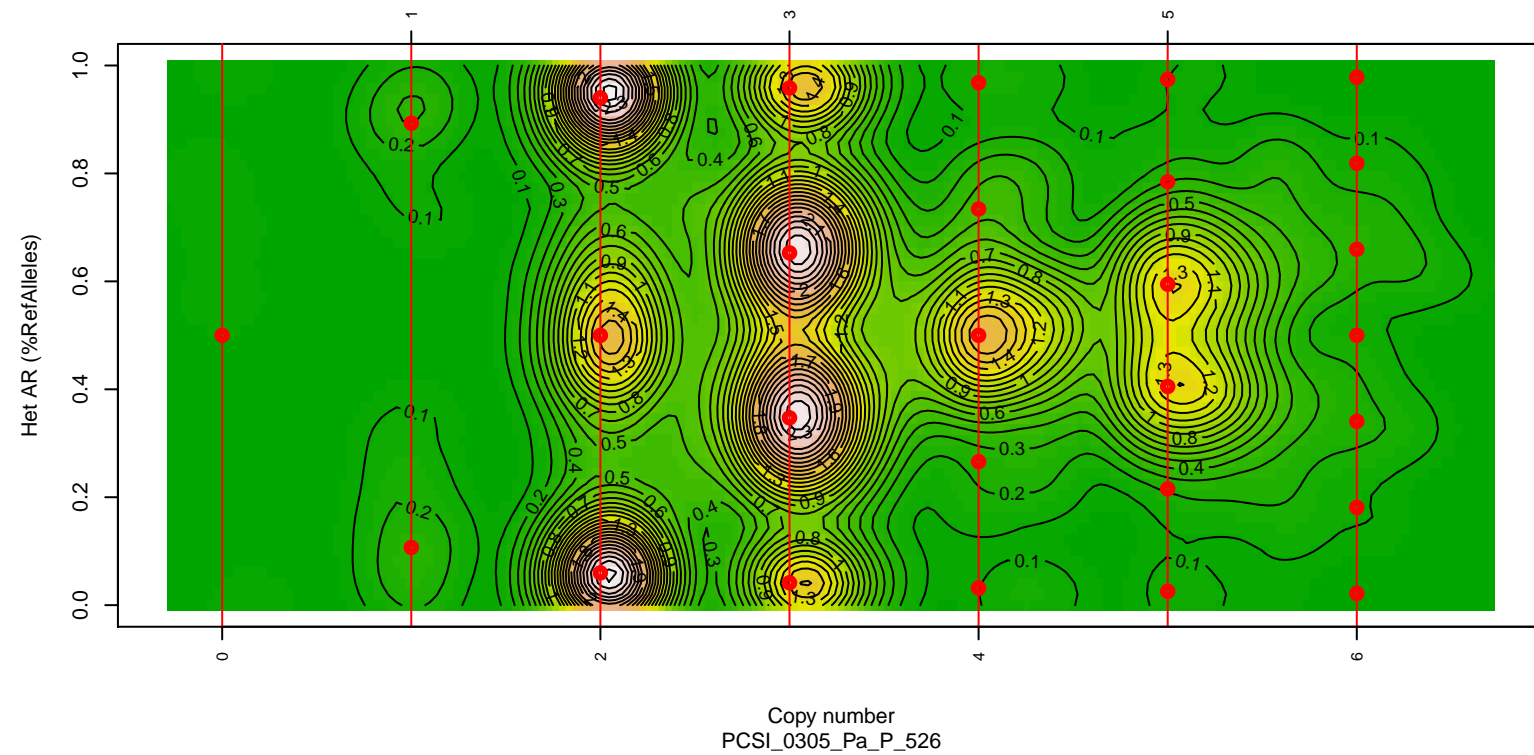

Copy number  
PCSI\_0305\_Pa\_P\_526

S:1.062, PLOIDY:1.854, %N:0.196, %T1:0.804

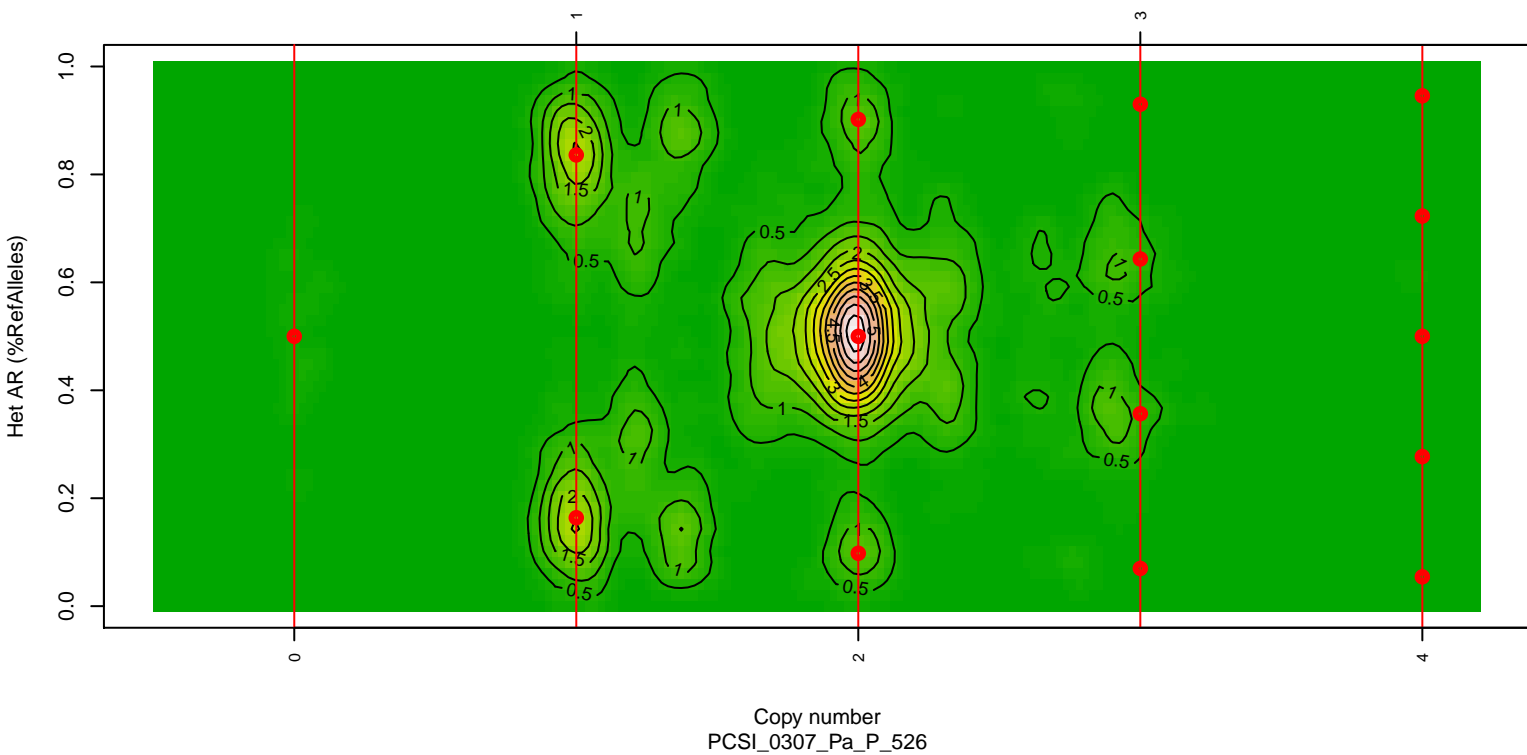

Copy number  
PCSI\_0307\_Pa\_P\_526

S:0.978, PLOIDY:2.094, %N:0.522, %T1:0.478

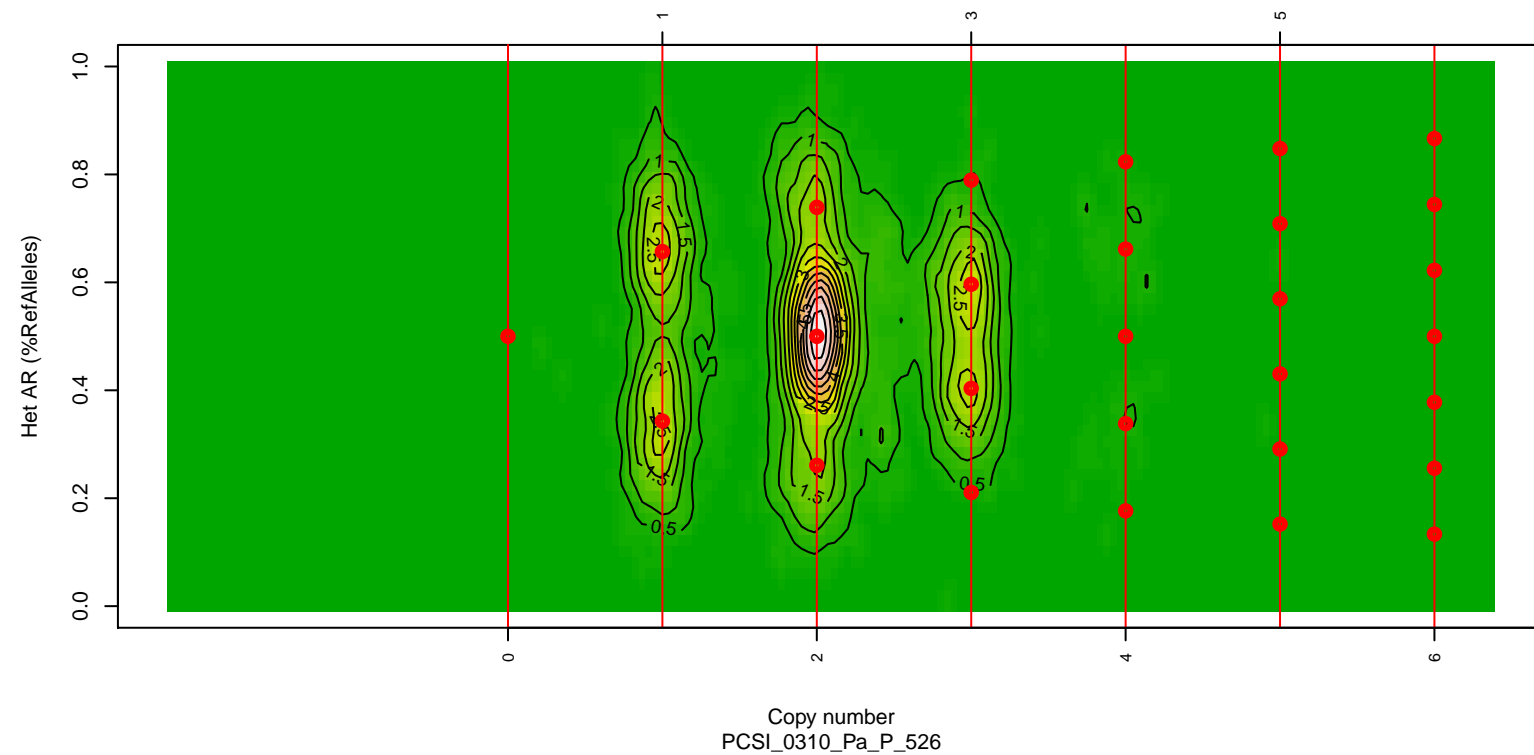

Copy number  
PCSI\_0310\_Pa\_P\_526

S:1.022, PLOIDY:1.921, %N:0.456, %T1:0.544

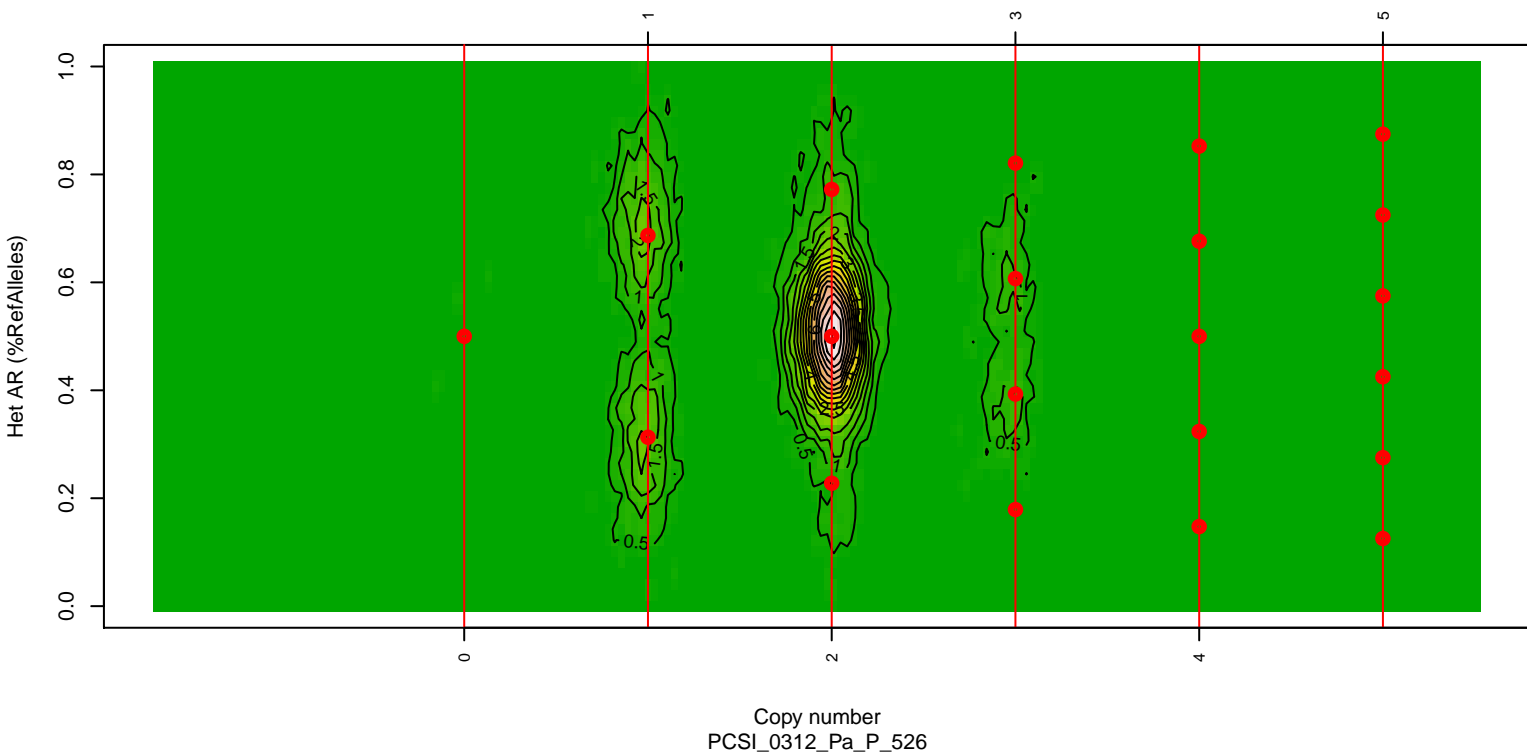

Copy number  
PCSI\_0312\_Pa\_P\_526

S:1.033, PLOIDY:1.884, %N:0.449, %T1:0.551

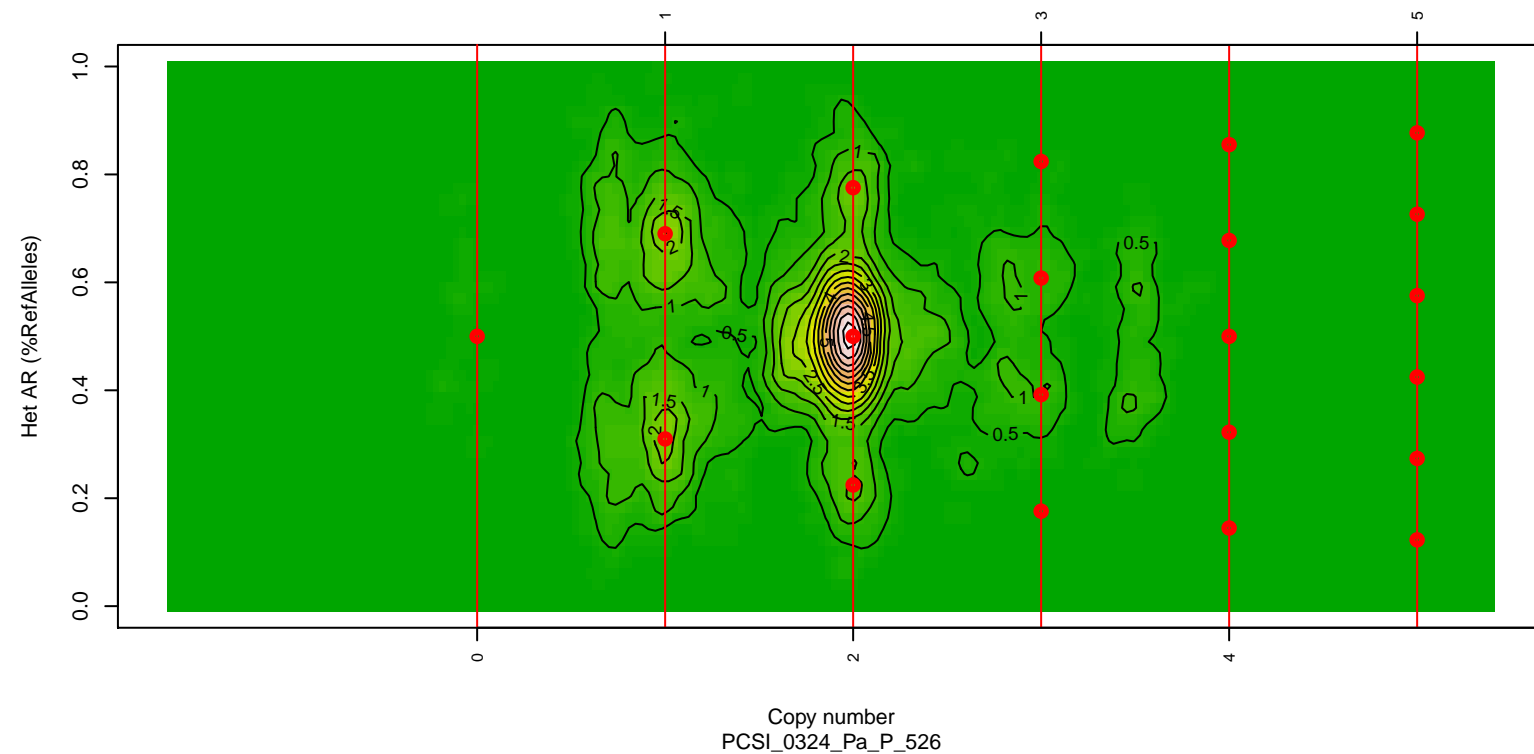

Copy number  
PCSI\_0324\_Pa\_P\_526



S:0.743, PLOIDY:3.061, %N:0.348, %T1:0.652

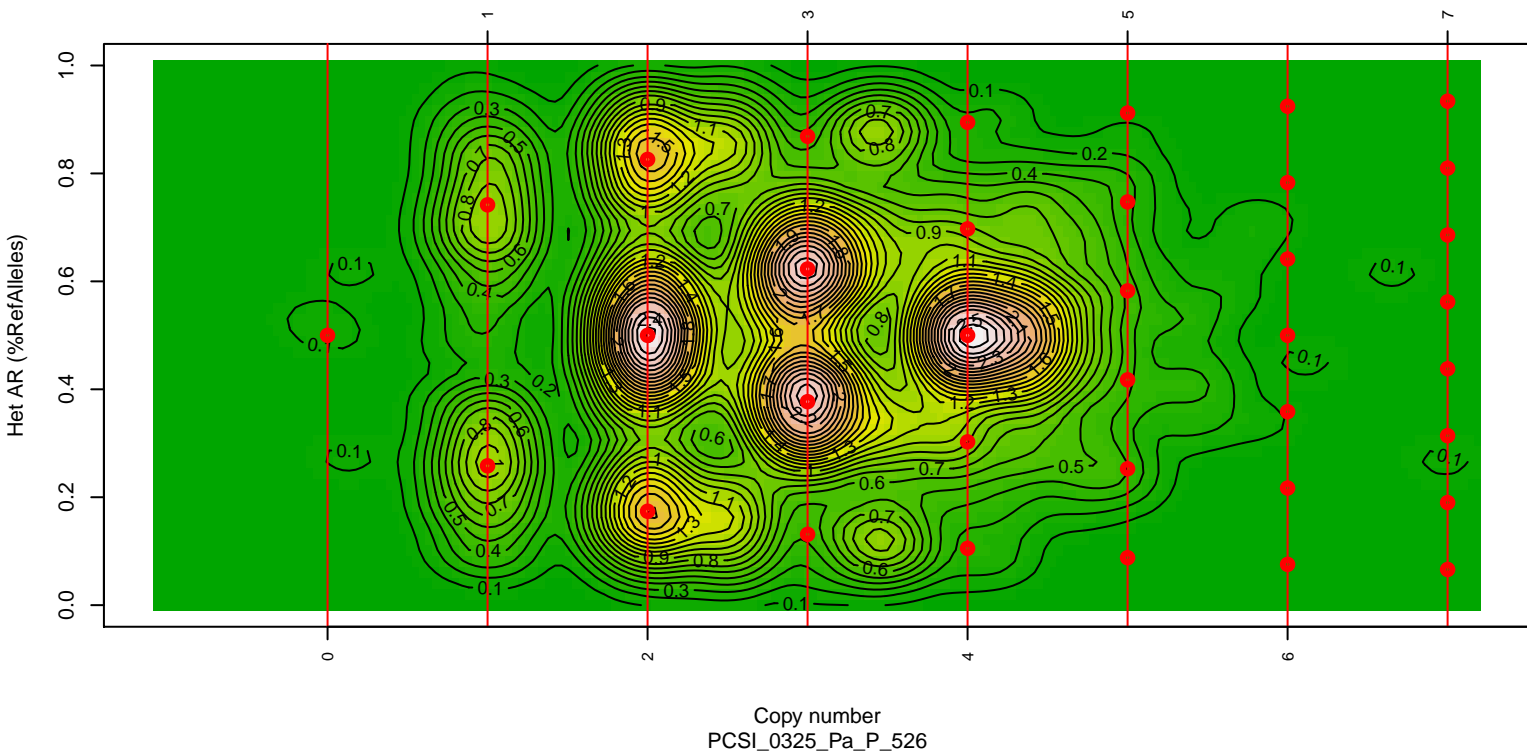

Copy number  
PCSI\_0325\_Pa\_P\_526

S:0.638, PLOIDY:3.499, %N:0.243, %T1:0.757

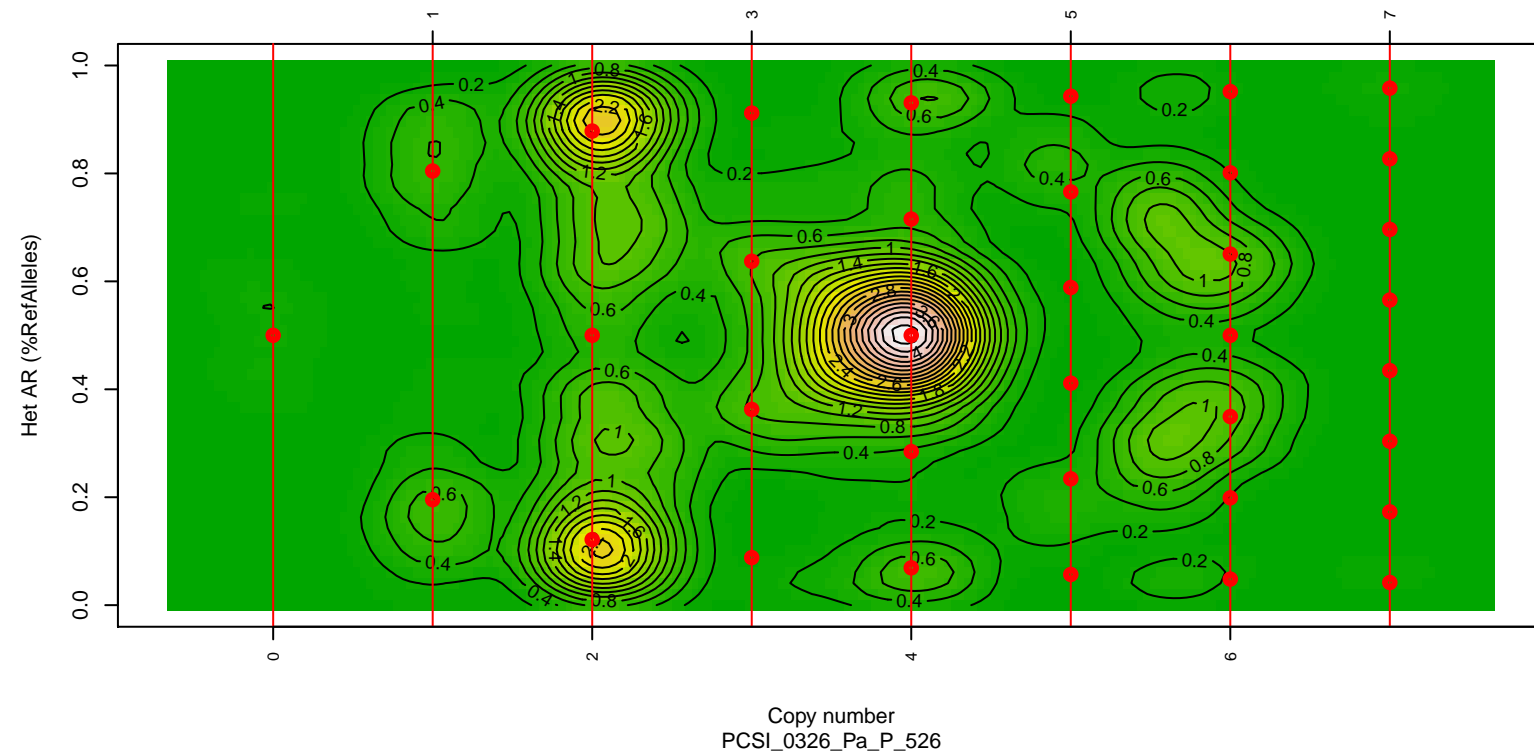

Copy number  
PCSI\_0326\_Pa\_P\_526

S:0.975, PLOIDY:2.071, %N:0.275, %T1:0.725

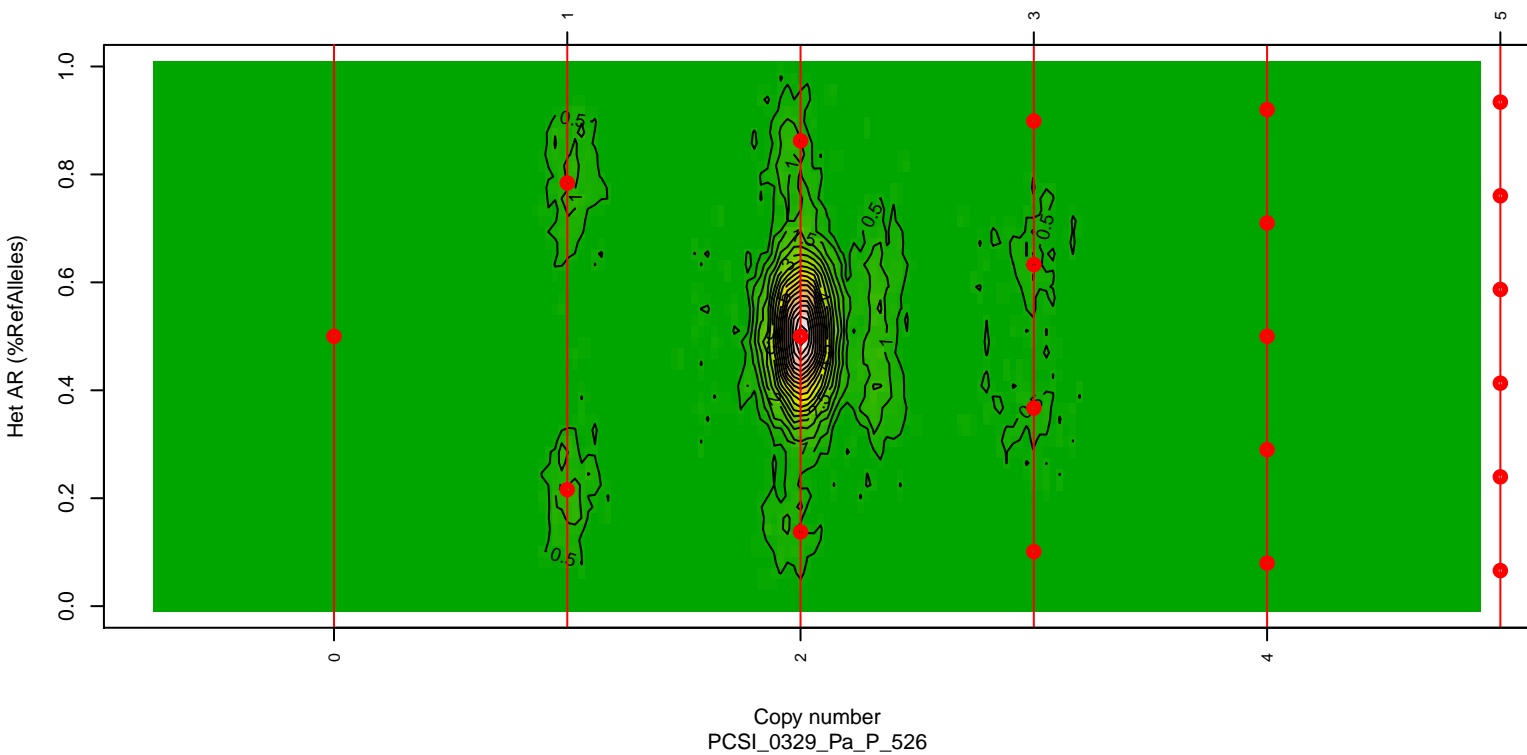

Copy number  
PCSI\_0329\_Pa\_P\_526

S:0.996, PLOIDY:2.013, %N:0.407, %T1:0.593

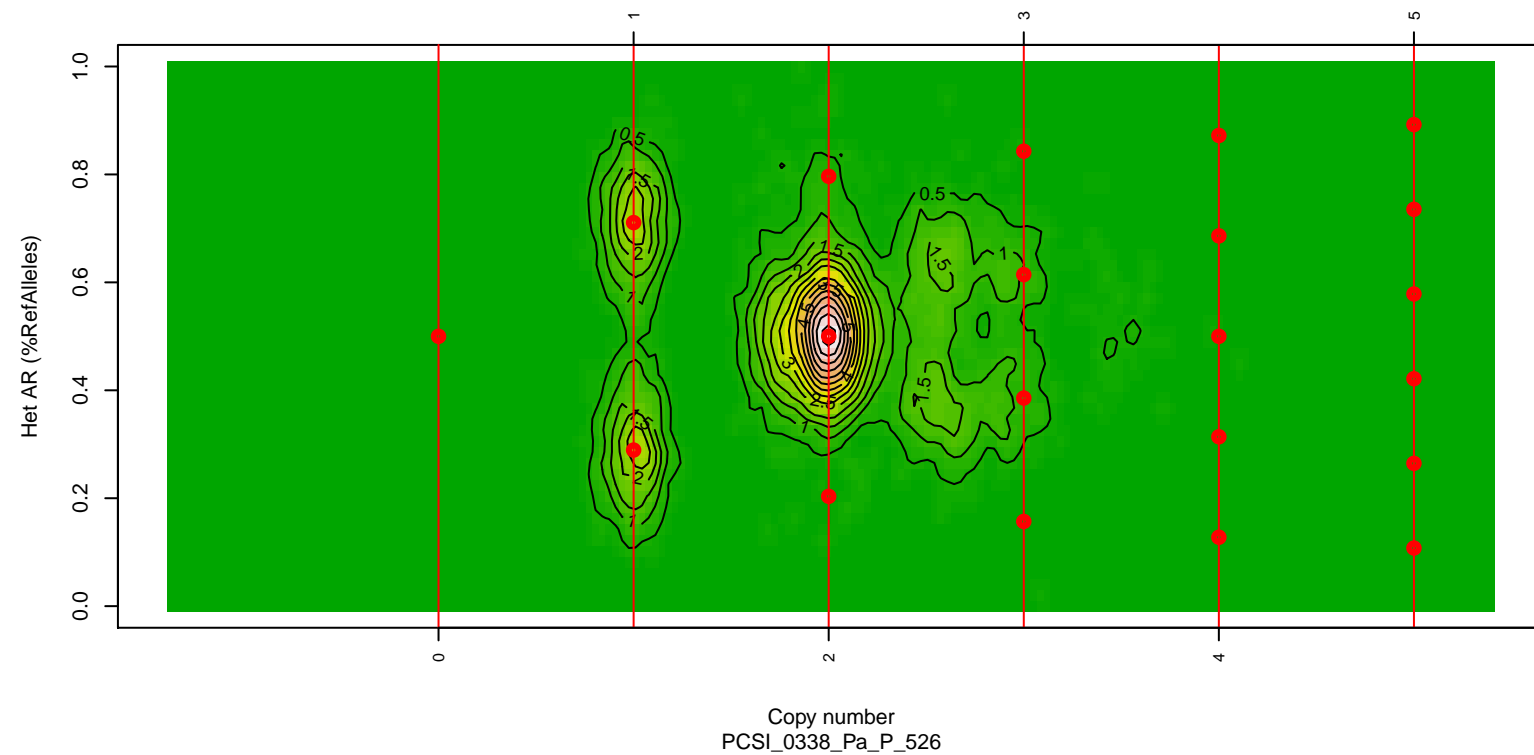

Copy number  
PCSI\_0338\_Pa\_P\_526

S:0.685, PLOIDY:3.733, %N:0.469, %T1:0.531

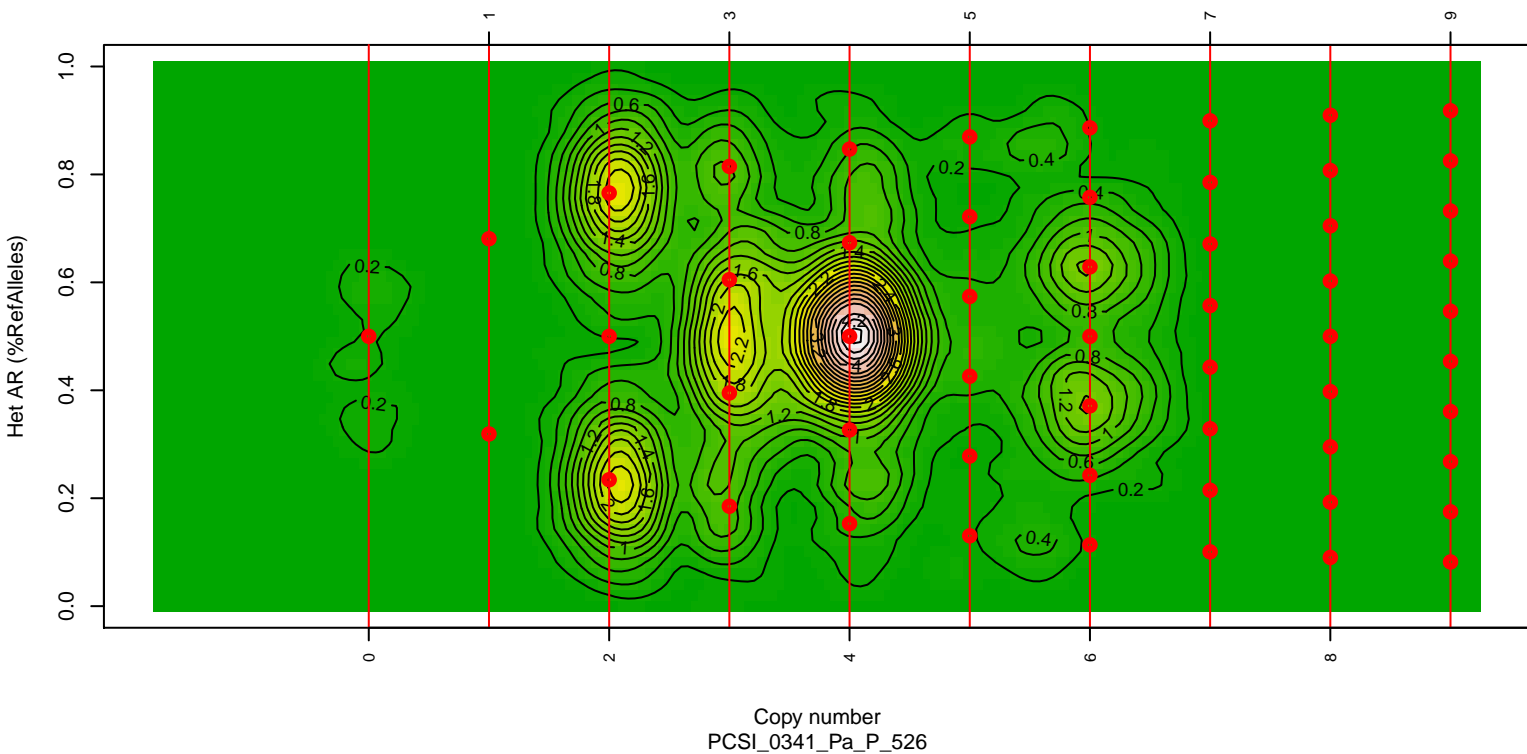

Copy number  
PCSI\_0341\_Pa\_P\_526

S:0.693, PLOIDY:3.601, %N:0.448, %T1:0.552

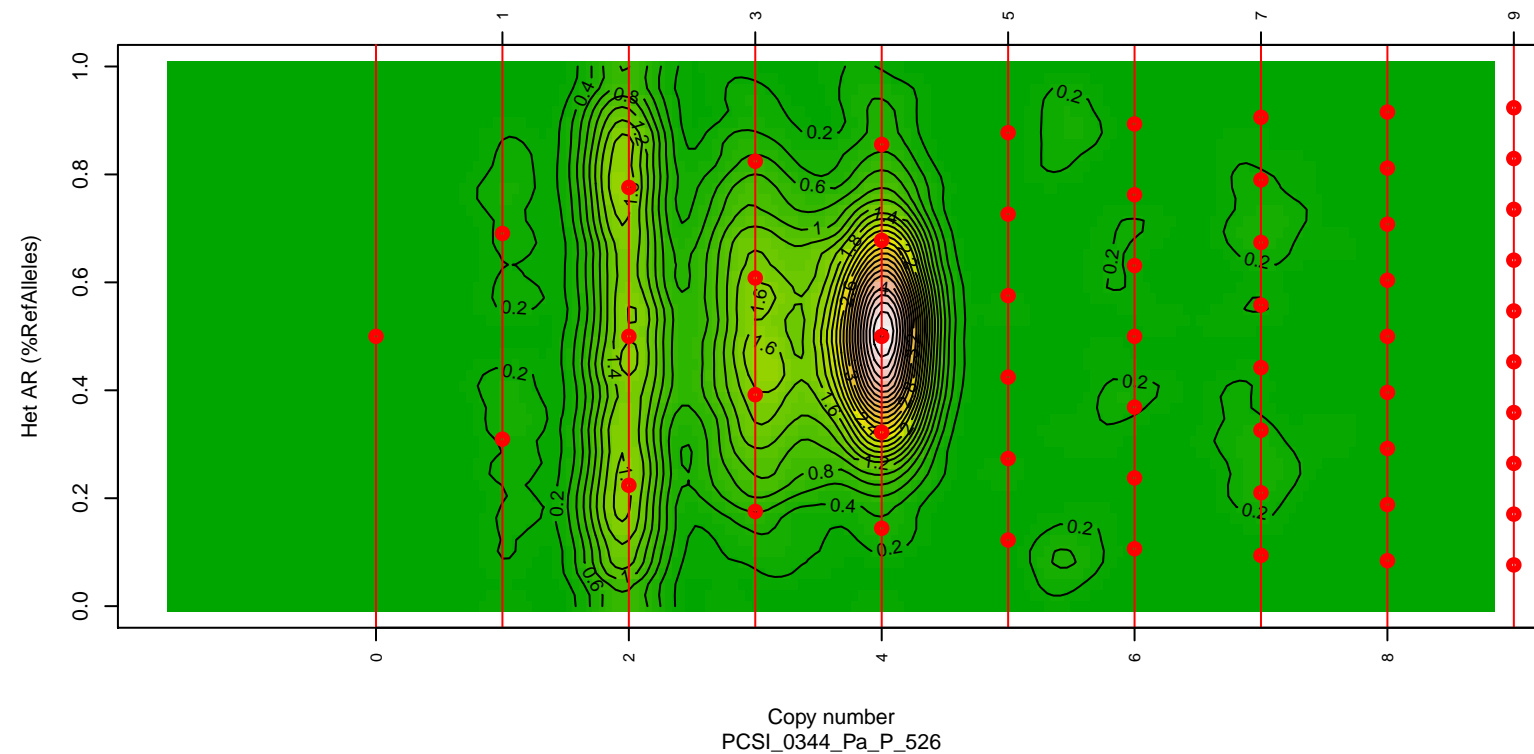

Copy number  
PCSI\_0344\_Pa\_P\_526

S:0.999, PLOIDY:2.003, %N:0.454, %T1:0.546

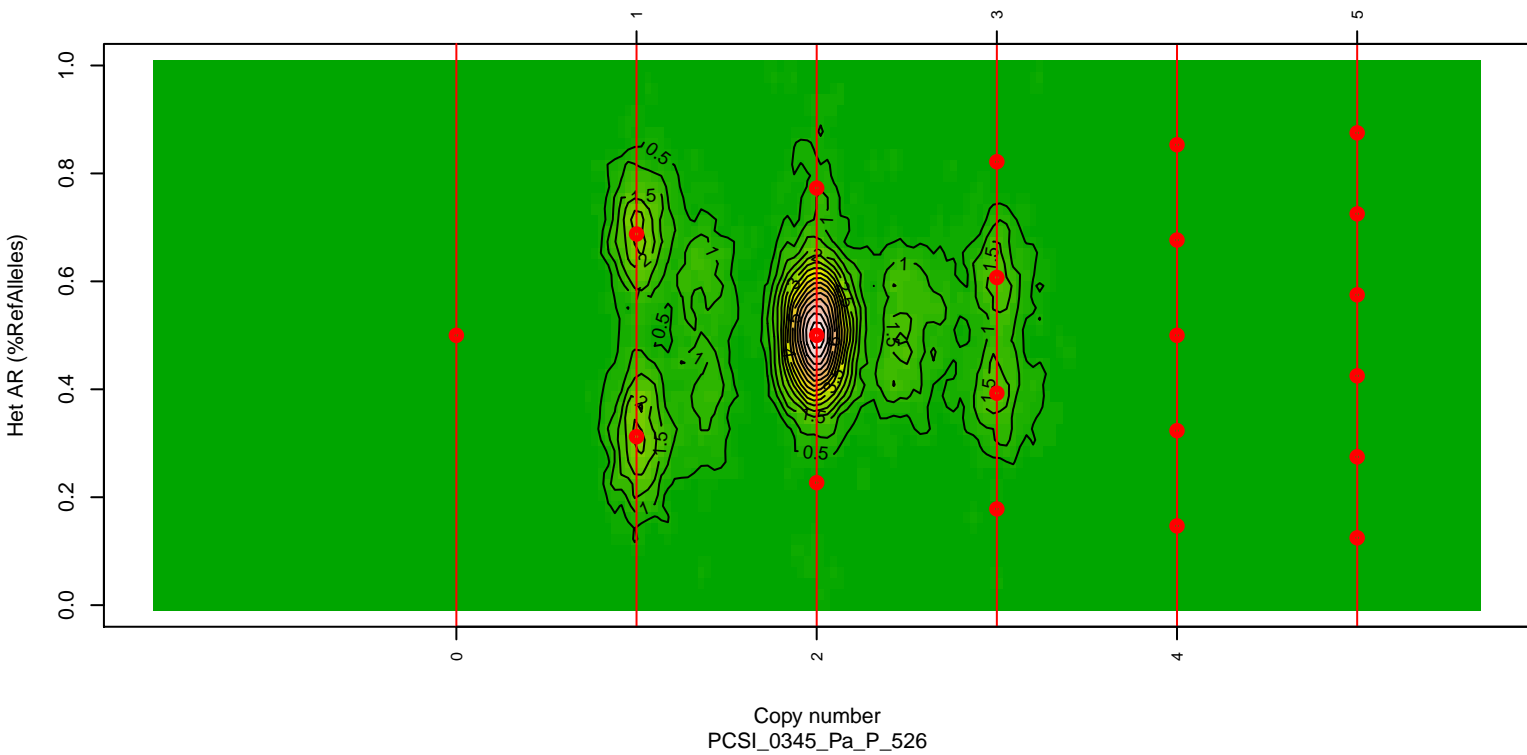

Copy number  
PCSI\_0345\_Pa\_P\_526

S:1.023, PLOIDY:1.95, %N:0.091, %T1:0.909

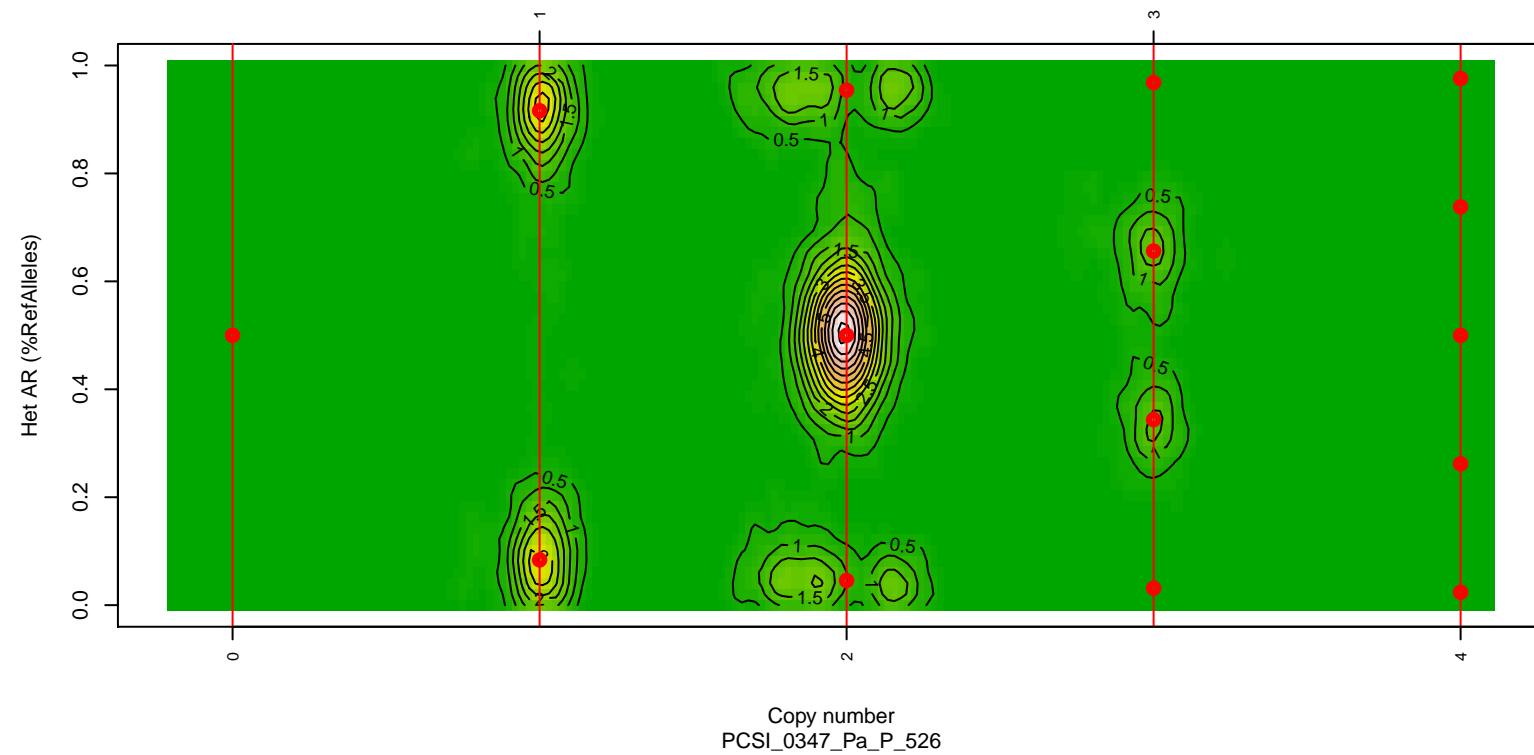

Copy number  
PCSI\_0347\_Pa\_P\_526

S:0.657, PLOIDY:3.35, %N:0.226, %T1:0.774

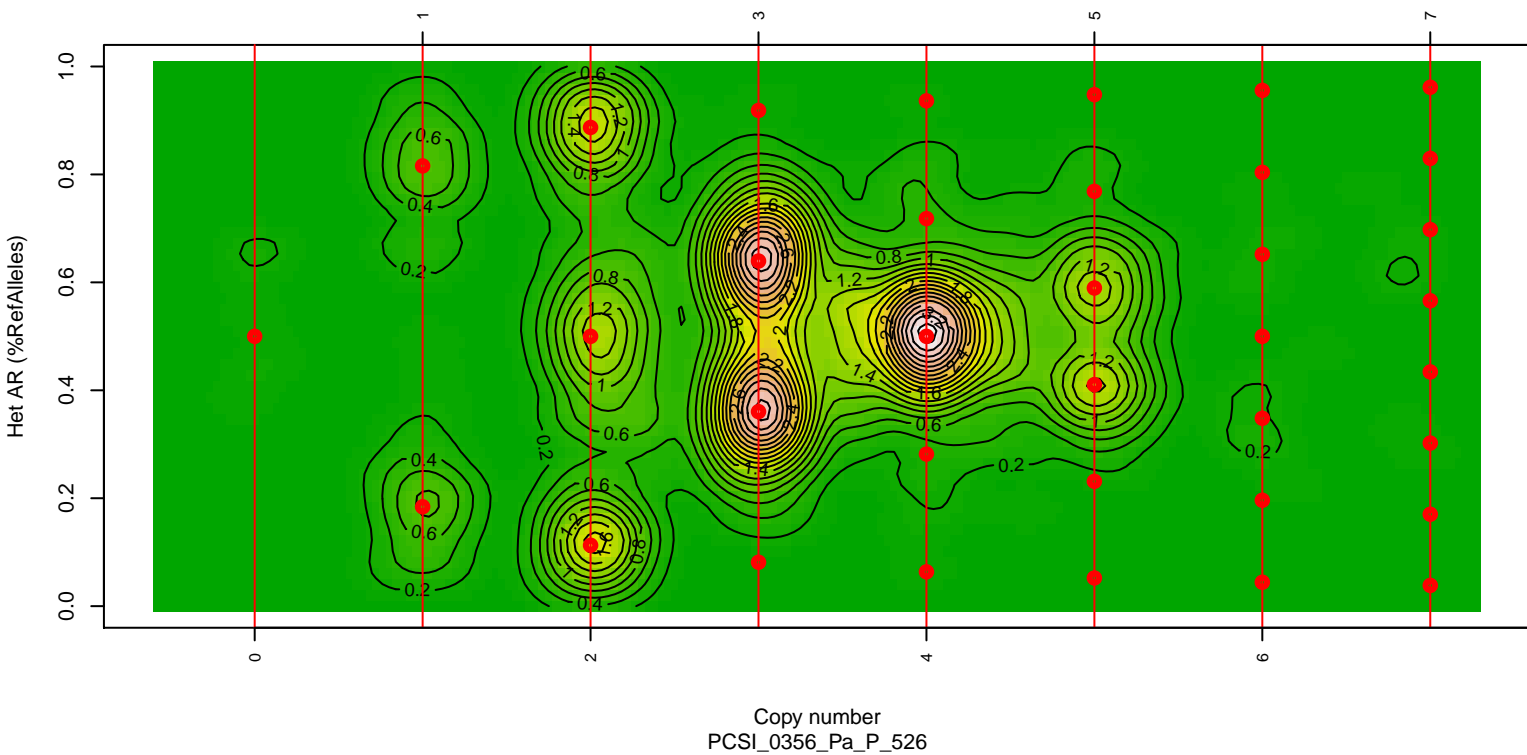

Copy number  
PCSI\_0356\_Pa\_P\_526

S:0.562, PLOIDY:4.007, %N:0.224, %T1:0.776

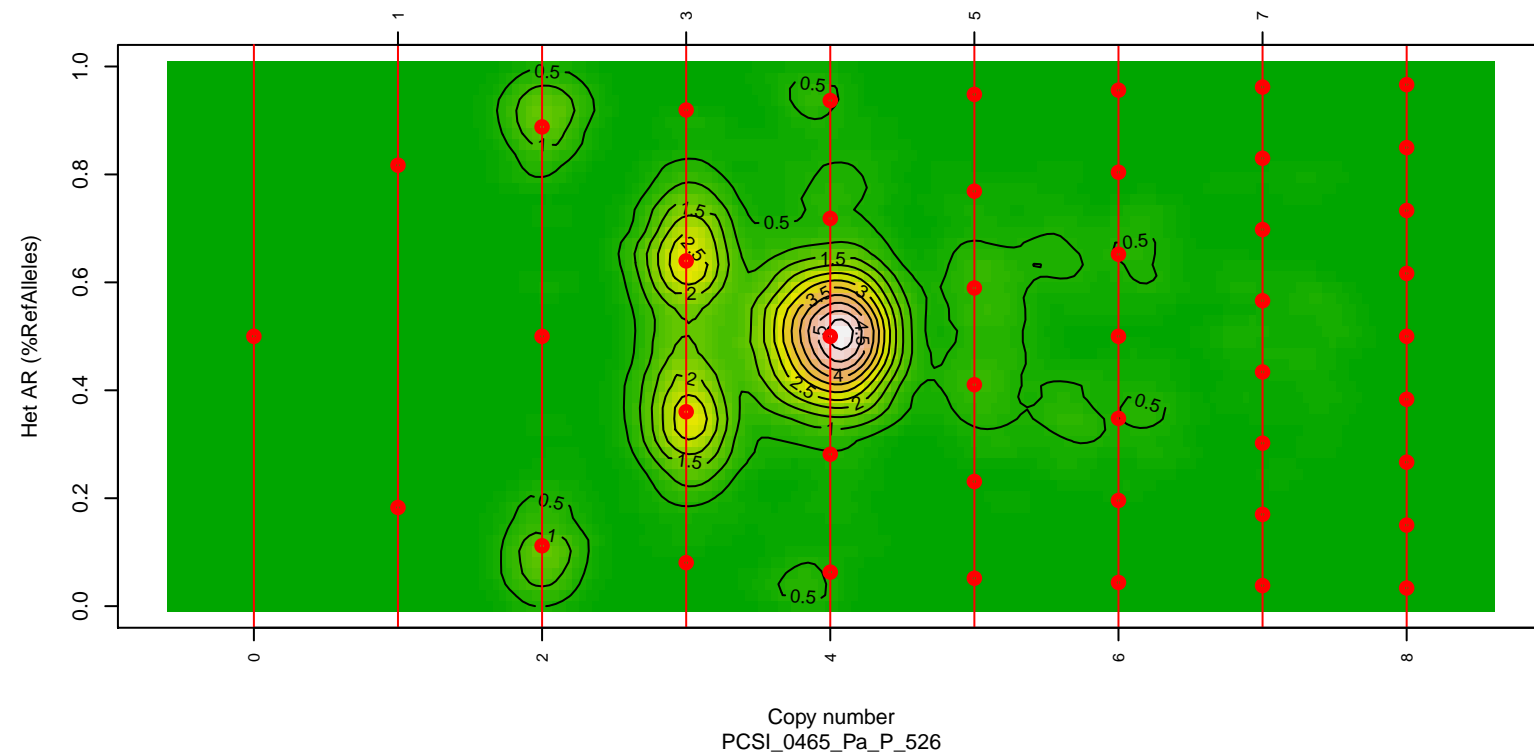

Copy number  
PCSI\_0465\_Pa\_P\_526

S:0.647, PLOIDY:3.34, %N:0.186, %T1:0.814

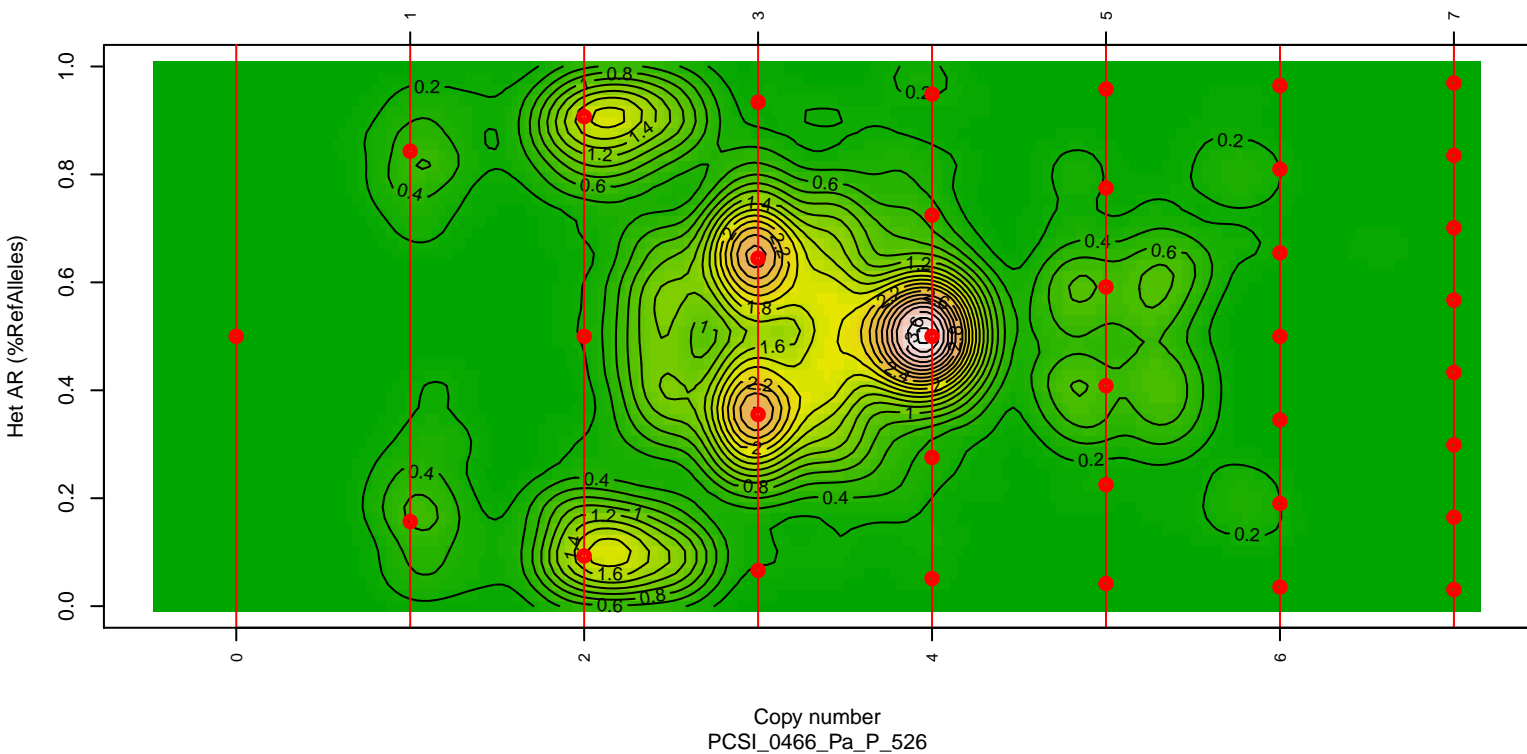

Copy number  
PCSI\_0466\_Pa\_P\_526

S:1.114, PLOIDY:1.76, %N:0.145, %T1:0.855

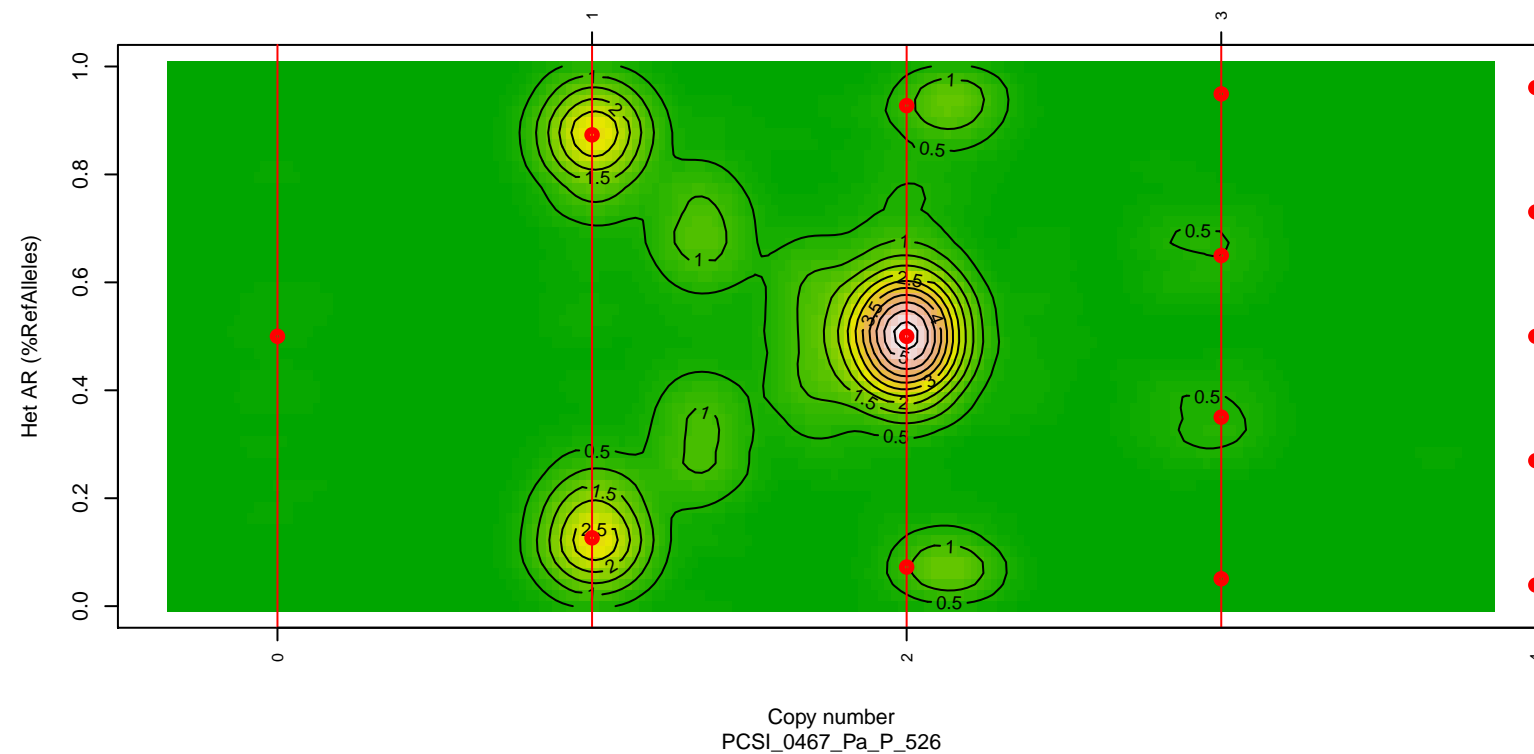

Copy number  
PCSI\_0467\_Pa\_P\_526



S:0.441, PLOIDY:5.516, %N:0.279, %T1:0.721

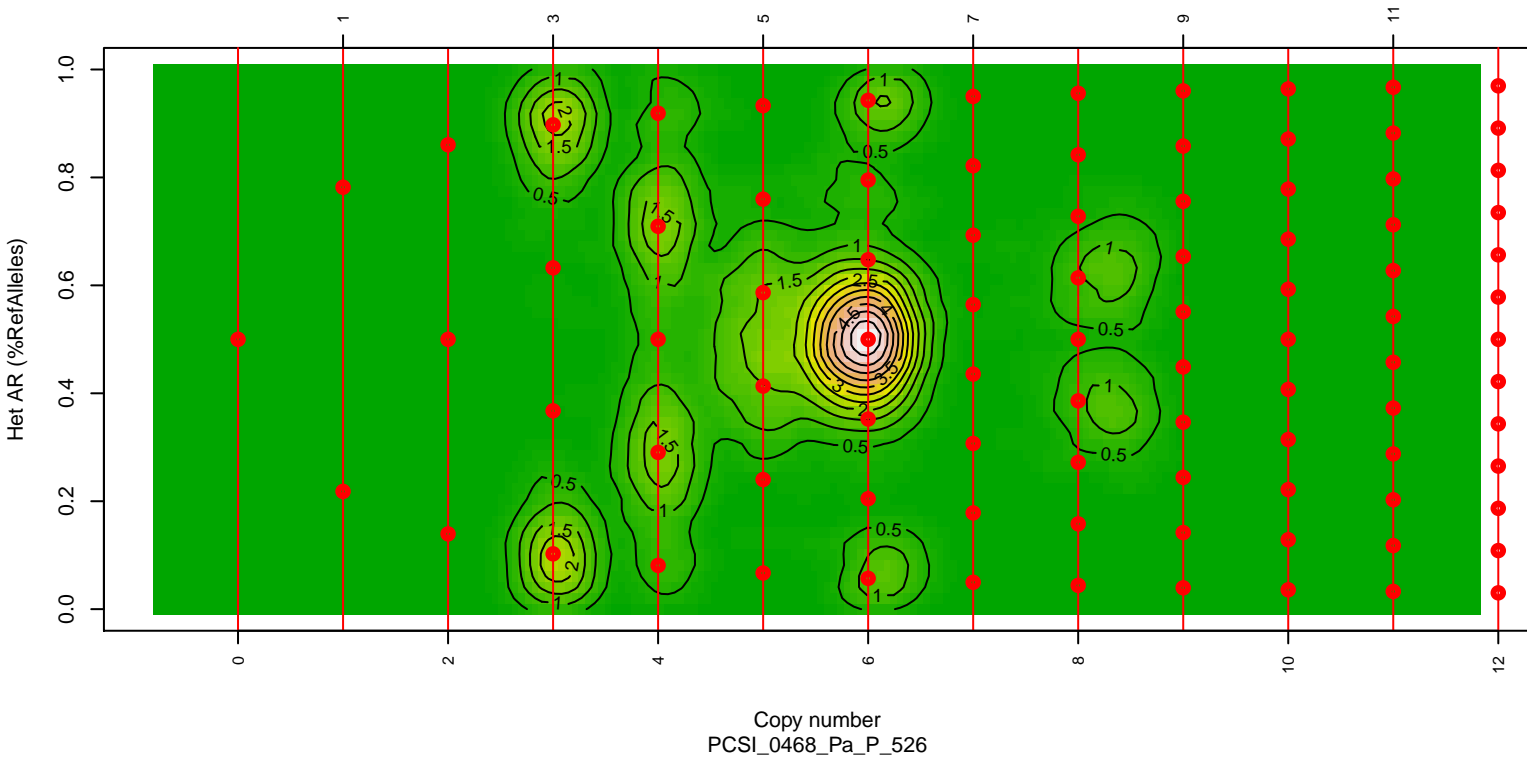

Copy number  
PCSI\_0468\_Pa\_P\_526

S:1.006, PLOIDY:1.985, %N:0.219, %T1:0.781

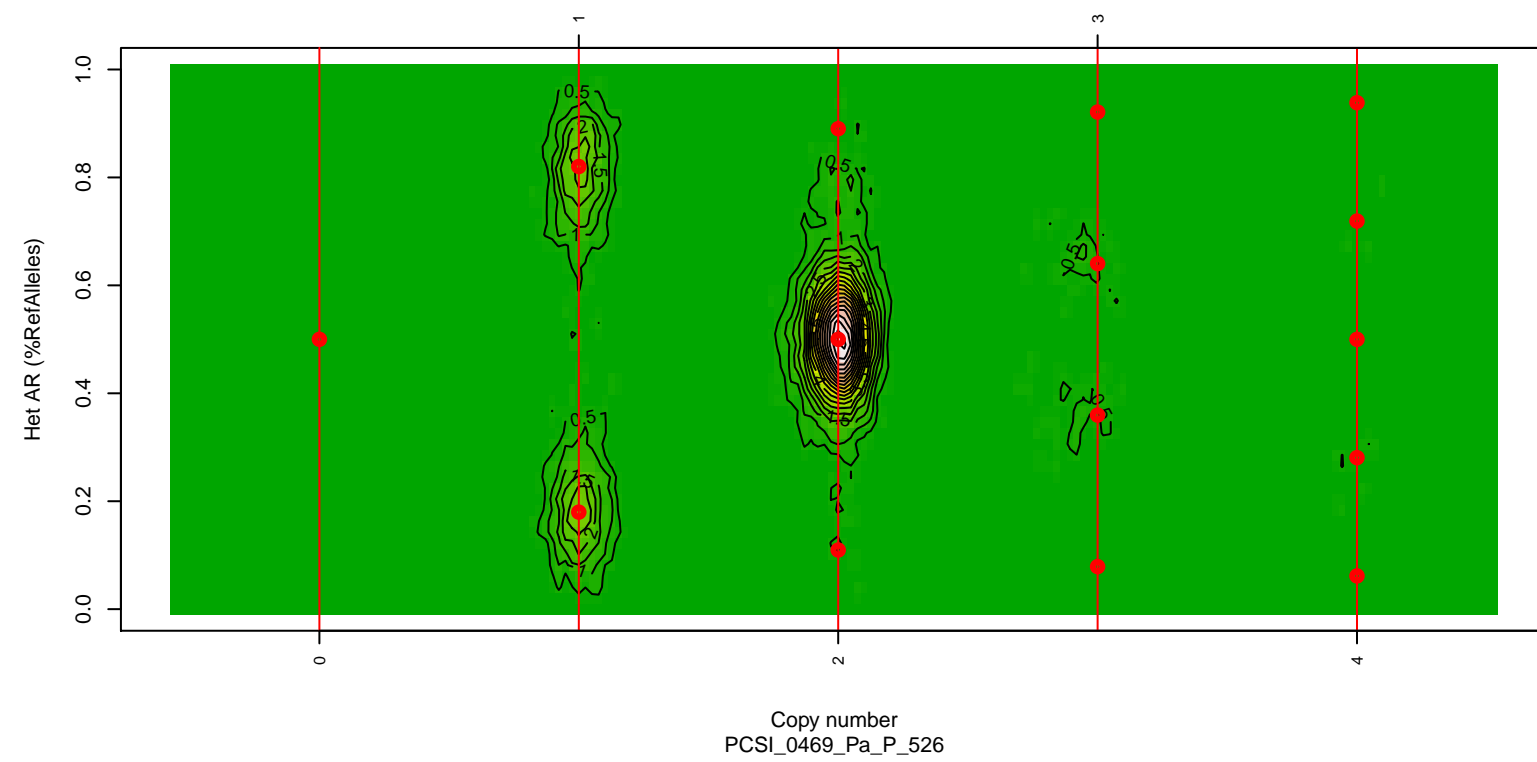

Copy number  
PCSI\_0469\_Pa\_P\_526

S:1.015, PLOIDY:1.949, %N:0.409, %T1:0.591

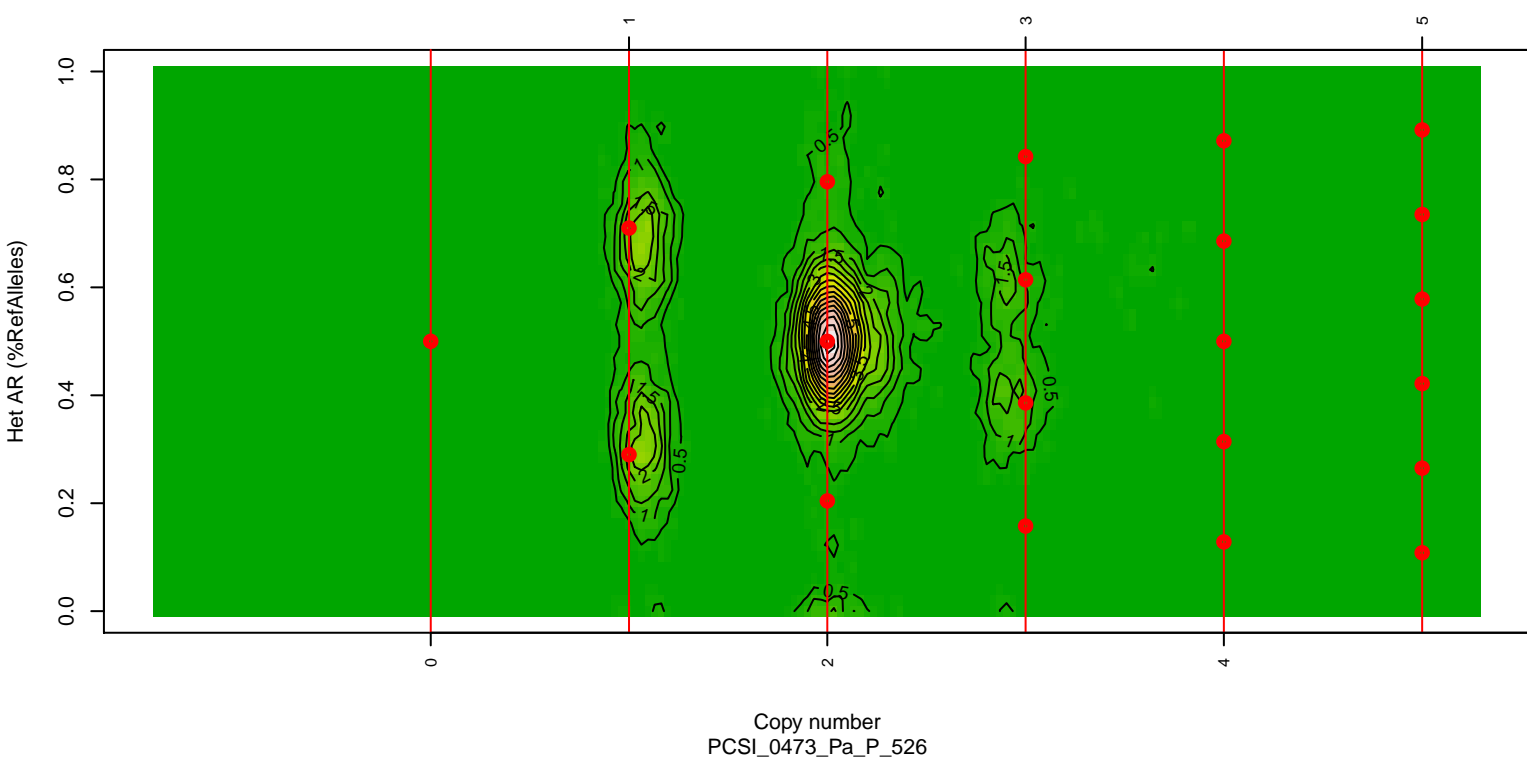

Copy number  
PCSI\_0473\_Pa\_P\_526

S:0.986, PLOIDY:2.041, %N:0.345, %T1:0.655

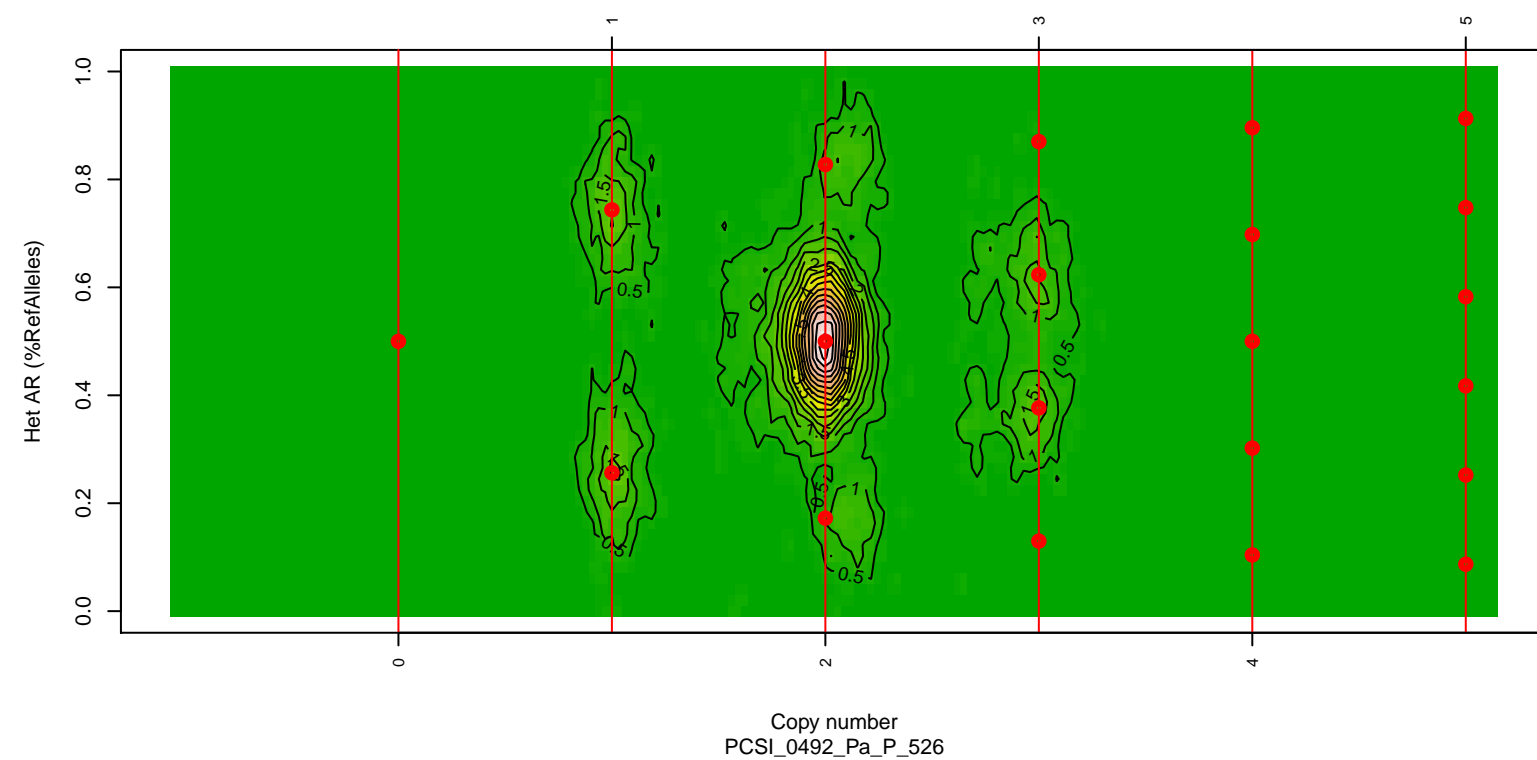

Copy number  
PCSI\_0492\_Pa\_P\_526

S:1.03, PLOIDY:1.923, %N:0.231, %T1:0.769

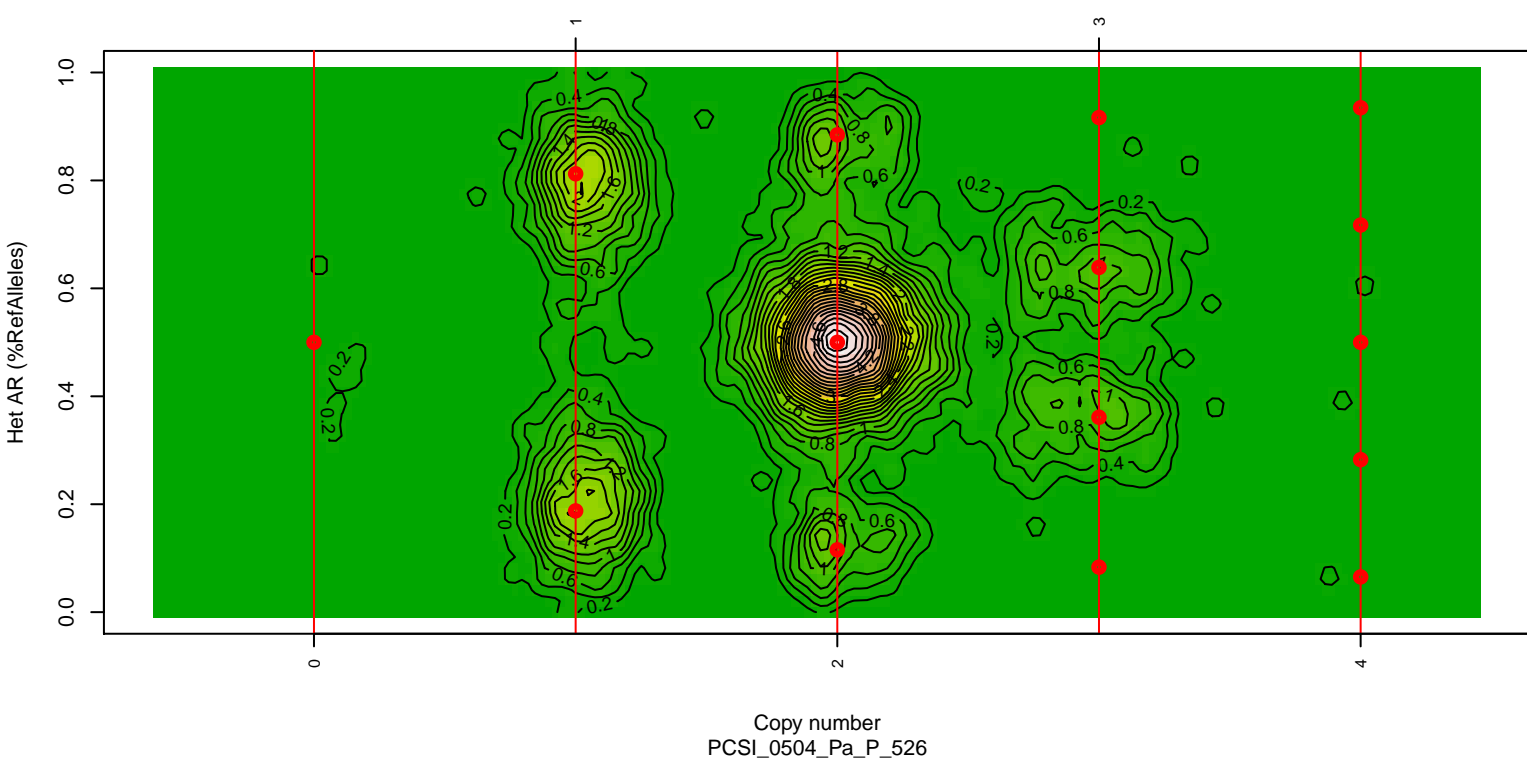

Copy number  
PCSI\_0504\_Pa\_P\_526

S:0.991, PLOIDY:2.028, %N:0.371, %T1:0.629

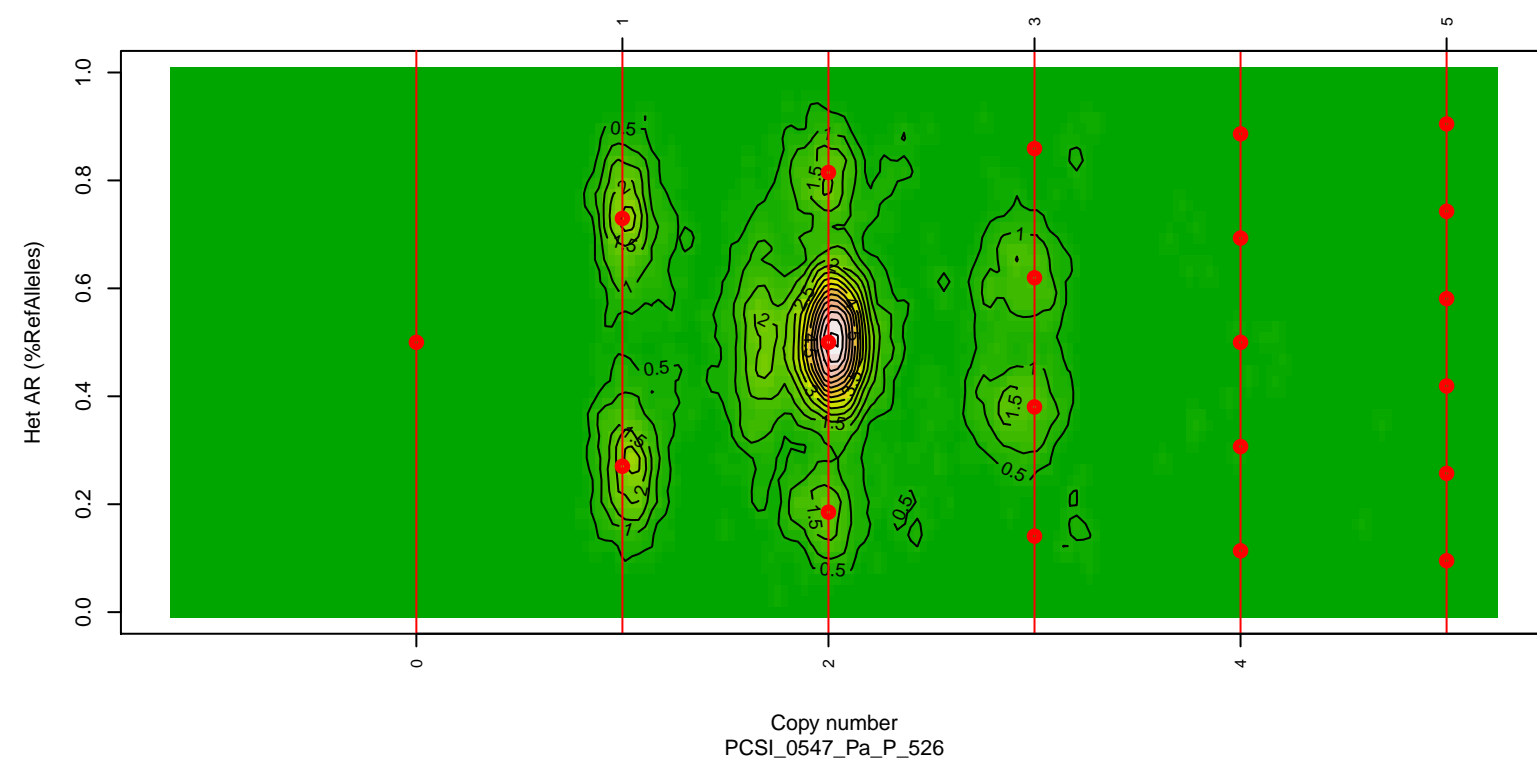

Copy number  
PCSI\_0547\_Pa\_P\_526

S:0.733, PLOIDY:2.975, %N:0.253, %T1:0.747

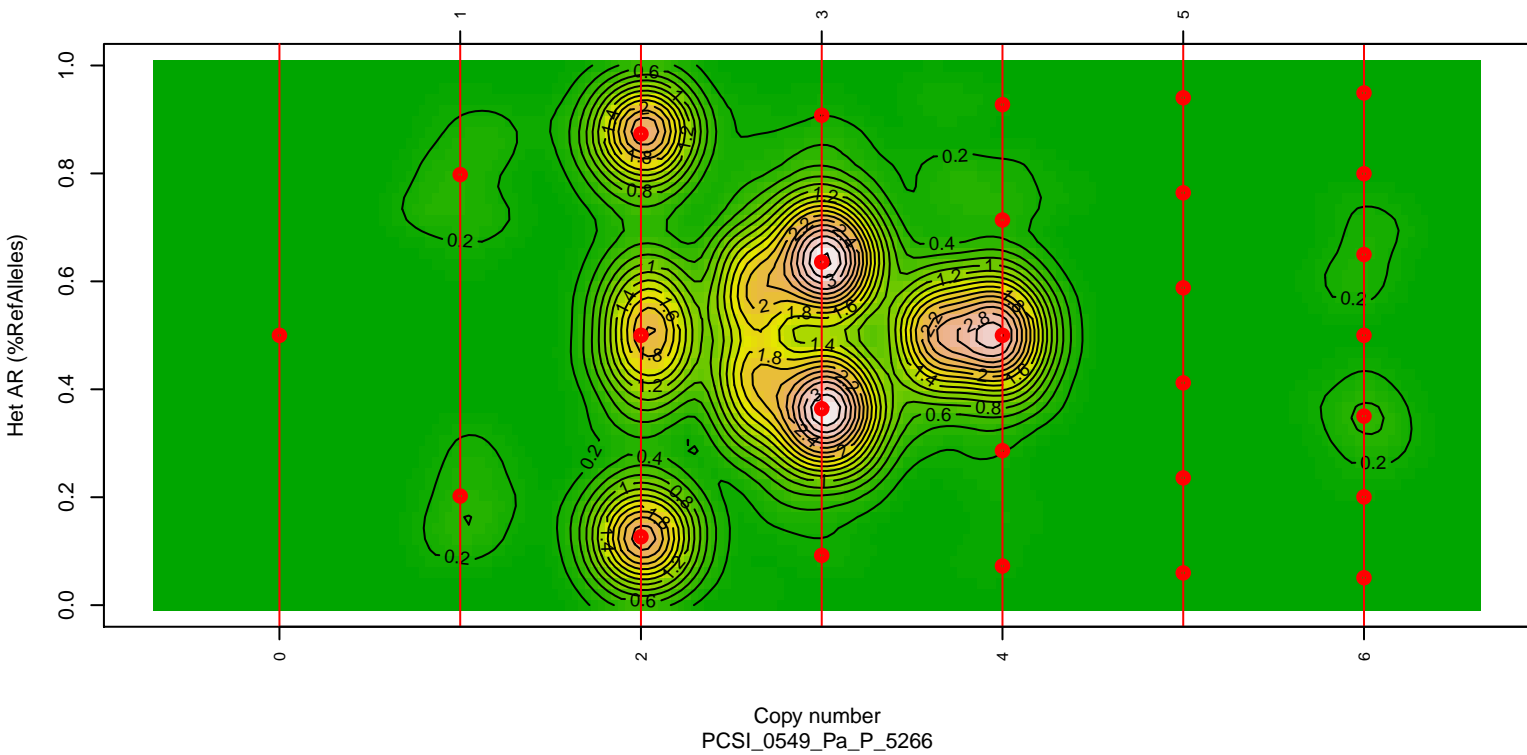

Copy number  
PCSI\_0549\_Pa\_P\_526

S:0.834, PLOIDY:2.788, %N:0.494, %T1:0.506

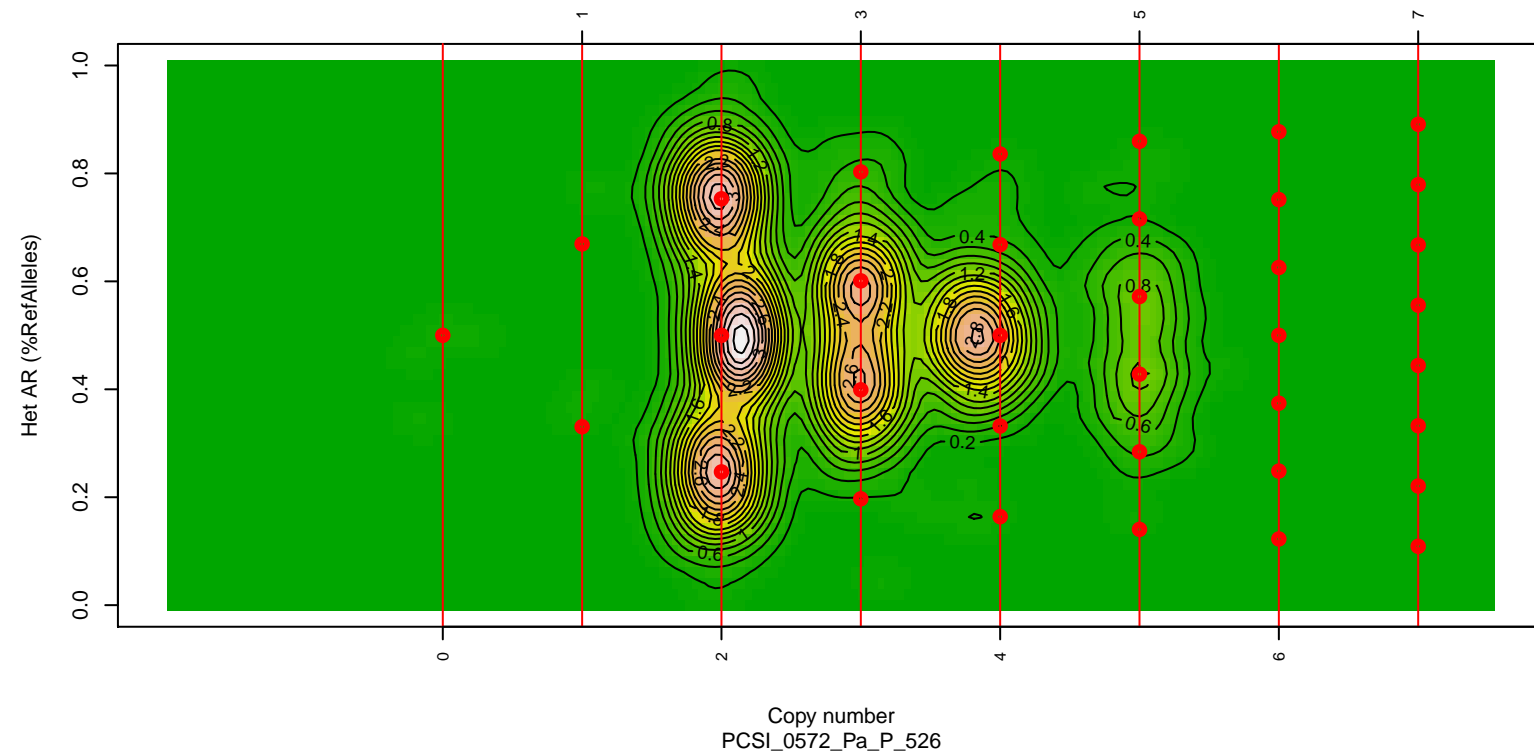

Copy number  
PCSI\_0572\_Pa\_P\_526

S:1.087, PLOIDY:1.787, %N:0.245, %T1:0.755

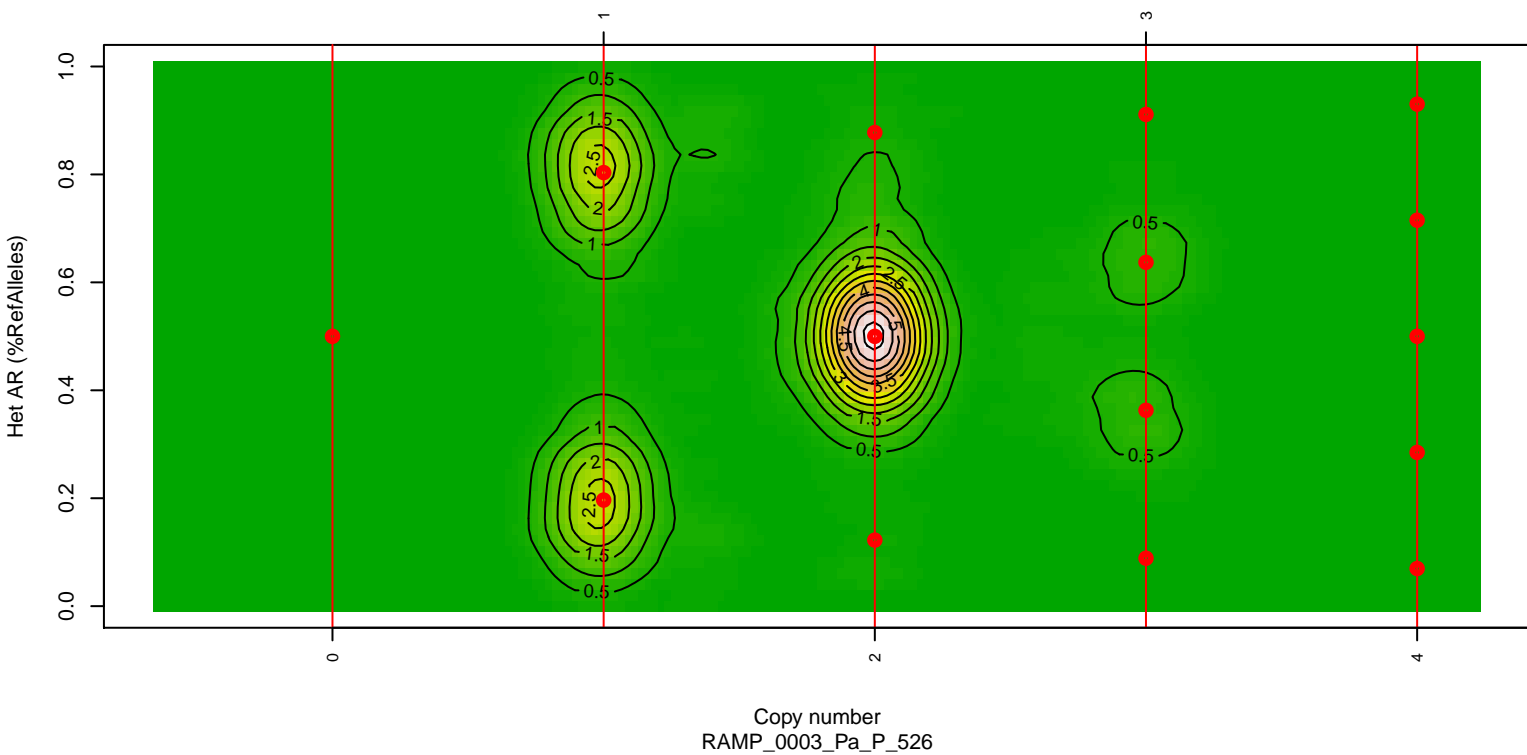

Copy number  
RAMP\_0003\_Pa\_P\_526

S:1.005, PLOIDY:1.988, %N:0.162, %T1:0.838

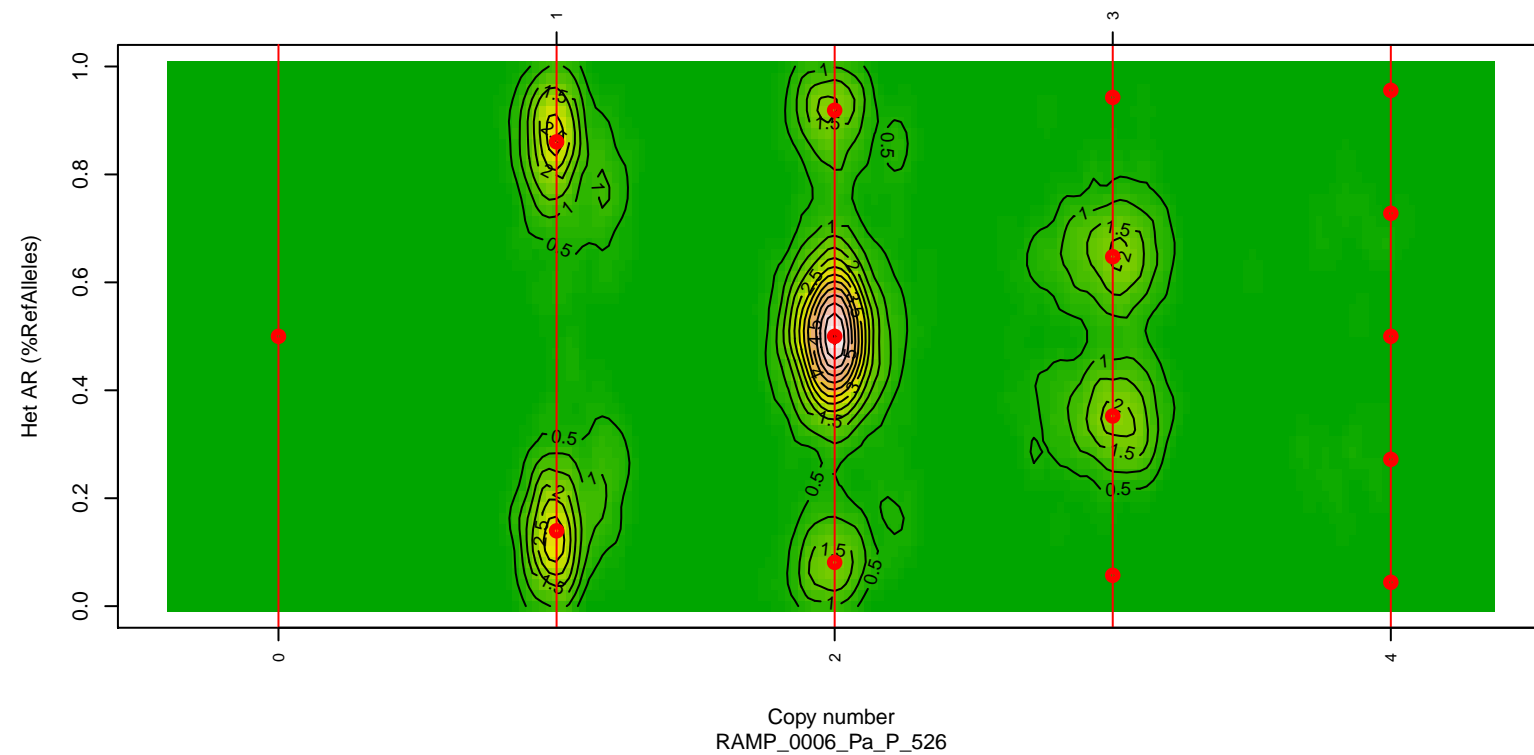

Copy number  
RAMP\_0006\_Pa\_P\_526

S:0.585, PLOIDY:3.623, %N:0.125, %T1:0.875

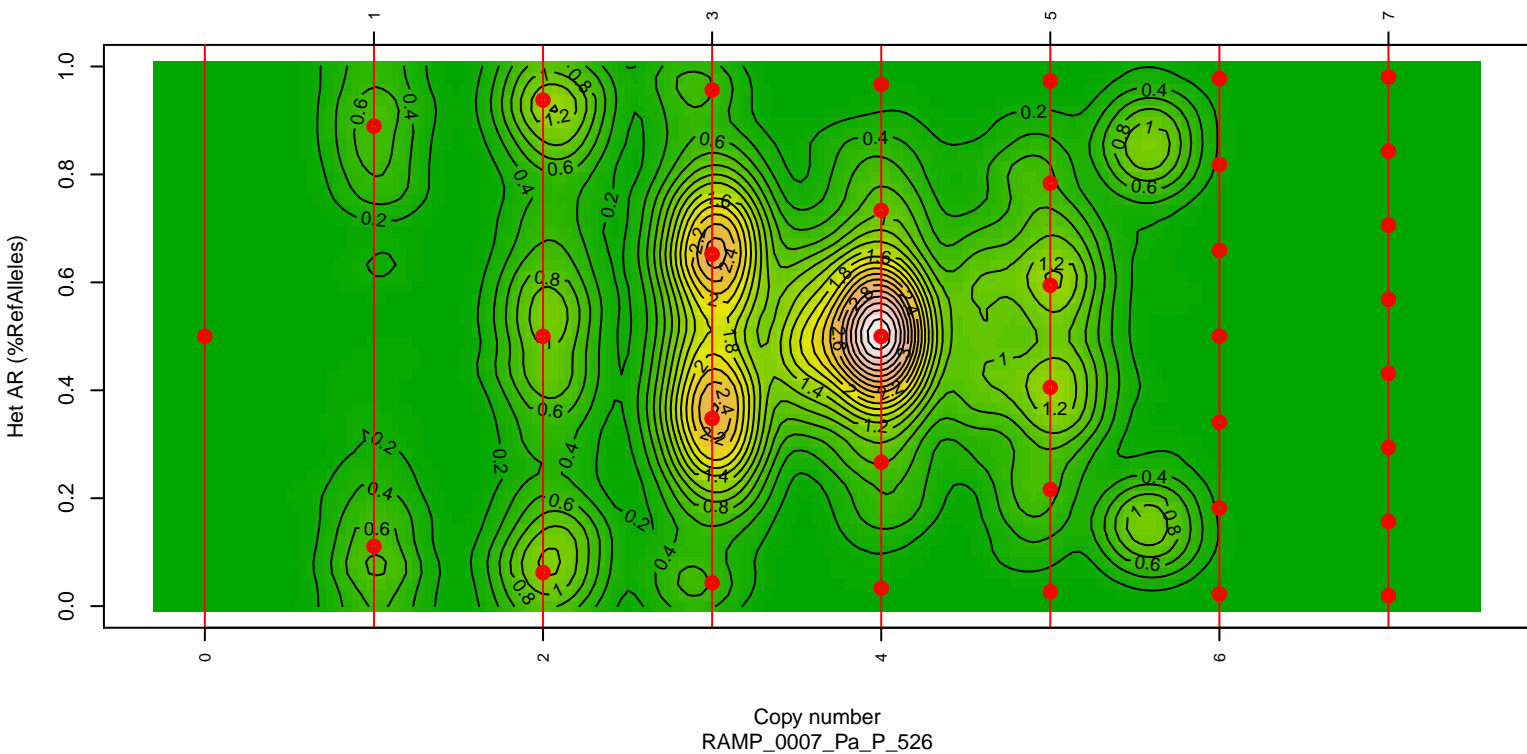

Copy number  
RAMP\_0007\_Pa\_P\_526
